# Supplementary material for: Partial Unlock for COVID-19-Like Epidemics Can Save 1-3 Million Lives Worldwide
Source: Preprints.org preprint supplement (doi:10.20944/preprints202004.0239.v5), 2020-05-21
Supplement: Supplementary file 3 [file supplementary]

## Sheet: US-likely
2020-05-15	2020-05-15	2040-10-01	2020-06-15	2020-08-15	2020-12-01	2021-02-01	scale all unlocks by	0-main region, 1-subregion, 2-without sub	Use Daily Intermittent Unlock->1	UNLOCK ALL->1	Initial & Unlocked R0	Total / Known case ratio	Mortality as % of vent cases enter at right	FINAL CASES	Econ Cost % 18-month lock down	Total Est. Deaths	Use proportional vent. alloc.	Initial Known Cases on Vent.	Vents per capita	Spreading Window (Days)	Case Duration	Vents avail for current region	Vents main region	Vents subregion (if not auto alloc)	Pre-Peak Vent. Util. Target	MWFSa or late Vent. Util. Target	TTSu Vent. Util. Target	Population	Population main region	Population subregion (e.g. NY St.)	Name of main region	Name of sub-region	Ventil mfg rate/day	Change per day in crit cases on vent 180 days only	region mortality % of vent cases	sub-region mortality % of vent cases	region w/o sub-region mortality % vent cases	immunity wears off (days)	population growth rate	ending 07/15/22	economic efficiency of unlock	low season start month	low season duration (months)	low season R0 max reduction
0	0.2	4.4	0.3	0.4	0.6	1	1	0	0	0	2.5	15	1.05	0.616004	0.352828	249815	0	0.05	0.000909091	6	14	100000	100000	200000	0.4	0.4	0.4	330000000	330000000	31897000	US	NYNJCT	300	0.0004	1.05	1.5	0.88	730	0.006	2021-07-19	1.2	5	5	0.8
Date	Predicted Known cases	US known cases	US known cases	NYNJCT known cases	Target Vent. Util.	Knwn Spreading Cases, unlk 60%, immu. 730 da., ratio=15, seasonal dur.5 mths. low 0.8*R0	Known Active Cases	Total Cum. Cases	US Known New Cases	US COVID-19 Replication Rate (R0)	Unlock this day of the week on:	Lock-down ON/OFF	0.2	US cases - ending 07/15/22	historical cases	UNLOCK %, R0=2.5, Deaths=0.25M, Cost=35.3%, Efficiency gain 1.2	ventilator utilization, 100000+300/day, improve 0.04%/day	predicted active cases, case ratio=15, low season 0.8*R0 for 5 months	present herd immunity threshold (60% natural)	predicted active cases, case ratio=10 R0=2.7	predicted active cases, case ratio=20 R0=2.3	potential unlock effectiveness	suscepti-bility	last fully locked R0	current # ventils	current % known cases on vent	Econ Cost %	unused	susceptibility change rate	Rt	US pred	NY pred	US excl NY pred	predicted from date	Est. Deaths	cases end date	date		population	date of non-decreasing susceptibility	immunity lapsed	R0 reduction
2020-03-21	24000	24000	24000	11930	0	24000	24000	360000	6226.59	2.5	2021-01-01	0	2020-03-21	0.00109091	0.00109091	0.2	0.012	0.00109091	0.6	0.000727273	0.00145455	0.2	0.998909	2.5	100000	0.05	0.76		1	2.49727	0.00423529	0.0062136	0.00426375	2020-05-21	326.896	2022-07-15		delta-cases	330000000	2021-07-19	0	1
2020-03-22	32821	32821	32821	17429	0	32821	32821	492315	8821	2.35262	2021-01-01	1	2020-03-22	0.00149184	0.00149184	0	0.0162792	0.00149184	0.574943	0.000994559	0.00198912	0	0.998508	2.35262	100000	0.0496	1		0.999599	2.34912	0.00599253	0.00878651	0.00603274	2020-05-21	786.294	2022-07-15	2020-03-22	8821	3.30005e+08	2021-07-19	0	1
2020-03-23	43600	43600	43600	24158	0	43600	43600	654000	10779	2.16157	2021-01-01	1	2020-03-23	0.00198175	0.00198175	0	0.0214526	0.00198175	0.537372	0.00132117	0.00264234	0	0.998018	2.42631	100000	0.0492032	1		0.999509	2.15728	0.00847445	0.0124154	0.00853121	2020-05-21	1343.17	2022-07-15	2020-03-23	10779	3.30011e+08	2021-07-19	0	1
2020-03-24	53870	53870	53870	29996	0	53870	53870	808050	10270	2.10687	2021-01-01	1	2020-03-24	0.00244852	0.00244852	0	0.0262937	0.00244852	0.525363	0.00163234	0.00326469	0	0.997551	2.2571	100000	0.0488096	1		0.999532	2.10171	0.0119755	0.0175242	0.0120556	2020-05-21	1869.51	2022-07-15	2020-03-24	10270	3.30016e+08	2021-07-19	0	1
2020-03-25	67857	67857	67857	38393	0	67857	67857	1017855	13987	2.04473	2021-01-01	1	2020-03-25	0.00308421	0.00308421	0	0.0328557	0.00308421	0.510938	0.00205614	0.00411228	0	0.996916	2.13422	100000	0.0484191	1		0.999363	2.03843	0.0169056	0.0246981	0.0170182	2020-05-21	2580.61	2022-07-15	2020-03-25	13987	3.30022e+08	2021-07-19	0	1
2020-03-26	84773	84773	84773	46945	0	84773	84773	1271595	16916	1.95223	2021-01-01	1	2020-03-26	0.003853	0.003853	0	0.040718	0.003853	0.487764	0.00256867	0.00513734	0	0.996147	2.0758	100000	0.0480317	1		0.999229	1.9447	0.0238305	0.0347348	0.0239884	2020-05-21	3433.74	2022-07-15	2020-03-26	16916	3.30027e+08	2021-07-19	0	1
2020-03-27	102738	102738	102738	54861	0	78738	102738	1541070	17965	1.84384	2021-01-01	1	2020-03-27	0.00466945	0.00466945	0	0.0375167	0.00466945	0.457652	0.00311297	0.00622593	0	0.995331	1.99848	100000	0.0476475	1		0.99918	1.83523	0.0335233	0.0487049	0.0337438	2020-05-21	4332.53	2022-07-15	2020-03-27	17965	3.30033e+08	2021-07-19	0	1
2020-03-28	122070	122070	122070	66164	0	89249	122070	1831050	19332	1.82848		1	2020-03-28	0.005548	0.005548	0	0.0421847	0.005548	0.453099	0.00369867	0.00739733	0	0.994452	1.89803	100000	0.0472663	1		0.999117	1.81834	0.04674	0.0676022	0.0470444	2020-05-21	5291.97	2022-07-15	2020-03-28	19332	3.30038e+08	2021-07-19	0	1
2020-03-29	140321	140321	140321	75162	0	96721	140321	2104815	18251	1.71288		1	2020-03-29	0.00637739	0.00637739	0	0.0453507	0.00637739	0.416188	0.00425159	0.00850318	0	0.993623	1.83616	100000	0.0468882	1		0.999166	1.70196	0.0643276	0.0924662	0.0647407	2020-05-21	6190.51	2022-07-15	2020-03-29	18251	3.30043e+08	2021-07-19	0	1
2020-03-30	162417	162417	162417	86669	0	108547	162417	2436255	22096	1.68898		1	2020-03-30	0.0073815	0.0073815	0	0.0504885	0.0073815	0.407925	0.004921	0.009842	0	0.992619	1.77068	100000	0.0465131	1		0.998989	1.67651	0.0874799	0.124697	0.0880308	2020-05-21	7269.65	2022-07-15	2020-03-30	22096	3.30049e+08	2021-07-19	0	1
2020-03-31	187500	187500	187500	98035	0	119643	187500	2812500	25083	1.6542		1	2020-03-31	0.00852133	0.00852133	0	0.0552044	0.00852133	0.39548	0.00568088	0.0113618	0	0.991479	1.70093	100000	0.046141	1		0.998852	1.64011	0.117531	0.165675	0.118252	2020-05-21	8484.87	2022-07-15	2020-03-31	25083	3.30054e+08	2021-07-19	0	1
2020-04-01	214465	214465	214465	110175	0	129692	214465	3216975	26965	1.60208		1	2020-04-01	0.00974665	0.00974665	0	0.0593624	0.00974665	0.375813	0.00649776	0.0129955	0	0.990253	1.67159	100000	0.0457718	1		0.998764	1.58647	0.155829	0.216486	0.156751	2020-05-21	9780.82	2022-07-15	2020-04-01	26965	3.3006e+08	2021-07-19	0	1
2020-04-02	244000	244000	244000	122385	0	141262	244000	3660000	29535	1.57791		1	2020-04-02	0.0110887	0.0110887	0	0.064141	0.0110887	0.366252	0.00739248	0.014785	0	0.988911	1.62814	100000	0.0454057	1		0.998645	1.56042	0.203501	0.277513	0.204647	2020-05-21	11188.9	2022-07-15	2020-04-02	29535	3.30065e+08	2021-07-19	0	1
2020-04-03	276000	276000	276000	138461	0	153930	276000	4140000	32000	1.54834		1	2020-04-03	0.0125428	0.0125428	0	0.0693338	0.0125428	0.354149	0.00836185	0.0167237	0	0.987457	1.59	100000	0.0450424	1		0.99853	1.52892	0.261084	0.347953	0.262462	2020-05-21	12702.4	2022-07-15	2020-04-03	32000	3.30071e+08	2021-07-19	0	1
2020-04-04	310500	310500	310500	155363	0	170179	286500	4657500	34500	1.51828		1	2020-04-04	0.0141104	0.0141104	0	0.0760395	0.0130197	0.341359	0.00867982	0.0173596	0	0.98589	1.56313	100000	0.0446821	1		0.998412	1.49685	0.311259	0.400831	0.312737	2020-05-21	14321	2022-07-15	2020-04-04	34500	3.30076e+08	2021-07-19	0	1
2020-04-05	336327	336327	336327	167265	0	173910	303506	5044905	25827	1.38878		1	2020-04-05	0.0152838	0.0152838	0	0.077085	0.0137923	0.279943	0.00919488	0.0183898	0	0.984716	1.53331	100000	0.0443246	1		0.99881	1.36755	0.379179	0.471759	0.38077	2020-05-21	15523	2022-07-15	2020-04-05	25827	3.30081e+08	2021-07-19	0	1
2020-04-06	364028	364028	364028	180057	0	176528	320428	5460420	27701	1.35278		1	2020-04-06	0.0165424	0.0165424	0	0.0776194	0.0145611	0.260779	0.00970739	0.0194148	0	0.983458	1.45353	100000	0.04397	1		0.998722	1.3304	0.448852	0.537363	0.45045	2020-05-21	16801.9	2022-07-15	2020-04-06	27701	3.30087e+08	2021-07-19	0	1
2020-04-07	395000	395000	395000	193900	0	180535	341130	5925000	30972	1.32813		1	2020-04-07	0.0179495	0.0179495	0	0.0787462	0.0155016	0.247064	0.0103344	0.0206688	0	0.98205	1.37078	100000	0.0436183	1		0.998569	1.30429	0.515085	0.591865	0.516562	2020-05-21	18220.4	2022-07-15	2020-04-07	30972	3.30092e+08	2021-07-19	0	1
2020-04-08	426659	426659	426659	207489	0	182659	358802	6399885	31659	1.28047		1	2020-04-08	0.0193879	0.0193879	0	0.0790353	0.0163044	0.219034	0.0108696	0.0217391	0	0.980612	1.34045	100000	0.0432693	1		0.998535	1.25564	0.572266	0.630591	0.573491	2020-05-21	19658.7	2022-07-15	2020-04-08	31659	3.30098e+08	2021-07-19	0	1
2020-04-09	466546	466546	466546	222847	0	190546	381773	6998190	39887	1.3179		1	2020-04-09	0.0212	0.0212	0	0.0817884	0.0173479	0.241215	0.0115653	0.0231305	0	0.9788	1.3043	100000	0.0429232	1		0.998152	1.28996	0.615228	0.650371	0.616094	2020-05-21	21456.4	2022-07-15	2020-04-09	39887	3.30103e+08	2021-07-19	0	1
2020-04-10	502000	502000	502000	237956	0	191500	399262	7530000	35454	1.26072		1	2020-04-10	0.0228107	0.0228107	0	0.0815403	0.0181423	0.206804	0.0120949	0.0241897	0	0.977189	1.29918	100000	0.0425798	1		0.998354	1.23196	0.640319	0.649909	0.64076	2020-05-21	23041.5	2022-07-15	2020-04-10	35454	3.30109e+08	2021-07-19	0	1
2020-04-11	531257	531257	531257	252651	0	194930	409187	7968855	29257	1.19394		1	2020-04-11	0.0241397	0.0241397	0	0.0823368	0.018593	0.162436	0.0123953	0.0247907	0	0.97586	1.28931	100000	0.0422391	1		0.99864	1.16512	0.64573	0.629468	0.645721	2020-05-21	24339.1	2022-07-15	2020-04-11	29257	3.30114e+08	2021-07-19	0	1
2020-04-12	560402	560402	560402	265310	0	196374	420081	8406030	29145	1.16741		1	2020-04-12	0.0254636	0.0254636	0	0.0822831	0.0190877	0.143404	0.0127251	0.0254502	0	0.974536	1.22733	100000	0.0419012	1		0.998643	1.13769	0.631305	0.590562	0.63085	2020-05-21	25621.4	2022-07-15	2020-04-12	29145	3.30119e+08	2021-07-19	0	1
2020-04-13	585290	585290	585290	275938	0	190290	422873	8779350	24888	1.09562		1	2020-04-13	0.026594	0.026594	0	0.0788594	0.0192142	0.0872787	0.0128095	0.025619	0	0.973406	1.18068	100300	0.041566	1		0.99884	1.06649	0.598222	0.535908	0.597358	2020-05-21	26707.6	2022-07-15	2020-04-13	24888	3.30125e+08	2021-07-19	0	1
2020-04-14	611745	611745	611745	288188	0	185086	424245	9176175	26455	1.07278		1	2020-04-14	0.0277956	0.0277956	0	0.0758623	0.0192763	0.0678431	0.0128508	0.0257017	0	0.972204	1.13152	100600	0.0412335	1		0.998766	1.04296	0.548788	0.469442	0.547575	2020-05-21	27853	2022-07-15	2020-04-14	26455	3.3013e+08	2021-07-19	0	1
2020-04-15	644025	644025	644025	302915	0	177479	429560	9660375	32280	1.09556		1	2020-04-15	0.0292618	0.0292618	0	0.0719478	0.0195174	0.0872269	0.0130116	0.0260232	0	0.970738	1.0842	100900	0.0409036	1		0.998492	1.0635	0.486447	0.396228	0.484974	2020-05-21	29239.4	2022-07-15	2020-04-15	32280	3.30136e+08	2021-07-19	0	1
2020-04-16	676339	676339	676339	316962	0	174339	432339	10145085	32314	1.0891		1	2020-04-16	0.0307295	0.0307295	0	0.0699017	0.0196434	0.081811	0.0130956	0.0261912	0	0.96927	1.08417	101200	0.0405764	1		0.998488	1.05563	0.415846	0.322038	0.414229	2020-05-21	30616.1	2022-07-15	2020-04-16	32314	3.30141e+08	2021-07-19	0	1
2020-04-17	709201	709201	709201	328569	0	177944	433201	10638015	32862	1.0971		1	2020-04-17	0.0322221	0.0322221	0	0.0705671	0.0196822	0.0885087	0.0131215	0.026243	0	0.967778	1.09233	101500	0.0402518	1		0.99846	1.06175	0.342499	0.252379	0.340868	2020-05-21	32005	2022-07-15	2020-04-17	32862	3.30146e+08	2021-07-19	0	1
2020-04-18	737023	737023	737023	339512	0	176621	426523	11055345	27822	1.05497		1	2020-04-18	0.0334856	0.0334856	0	0.0692774	0.0193785	0.0521061	0.012919	0.025838	0	0.966514	1.0931	101800	0.0399298	1		0.998694	1.01964	0.271967	0.1914	0.270444	2020-05-21	33171.5	2022-07-15	2020-04-18	27822	3.30152e+08	2021-07-19	0	1
2020-04-19	764265	764265	764265	350004	0	178975	427938	11463975	27242	1.04165		1	2020-04-19	0.0347228	0.0347228	0	0.0694345	0.0194425	0.0399876	0.0129616	0.0259233	0	0.965277	1.07604	102100	0.0396103	1		0.99872	1.00548	0.208799	0.141228	0.207471	2020-05-21	34304.5	2022-07-15	2020-04-19	27242	3.30157e+08	2021-07-19	0	1
2020-04-20	792759	792759	792759	360229	0	181014	428731	11891385	28494	1.03724		1	2020-04-20	0.0360167	0.0360167	0	0.0694596	0.0194782	0.0359044	0.0129854	0.0259709	0	0.963983	1.04831	102400	0.0392935	1		0.998659	0.999884	0.155711	0.102024	0.154622	2020-05-21	35480.1	2022-07-15	2020-04-20	28494	3.30163e+08	2021-07-19	0	1
2020-04-21	816385	816385	816385	368679	0	172360	421385	12245775	23626	0.979247		1	2020-04-21	0.0370895	0.0370895	0	0.0654181	0.0191441	0	0.0127627	0.0255255	0	0.96291	1.03945	102700	0.0389791	1		0.998887	0.942927	0.113447	0.0726087	0.112597	2020-05-21	36447.1	2022-07-15	2020-04-21	23626	3.30168e+08	2021-07-19	0	1
2020-04-22	848994	848994	848994	379925	0	172655	422335	12734910	32609	1.04832		1	2020-04-22	0.0385703	0.0385703	0	0.0648165	0.019187	0.0460948	0.0127913	0.0255826	0	0.96143	1.00824	103000	0.0386673	1		0.998462	1.00789	0.0812314	0.0512009	0.0805932	2020-05-21	37771	2022-07-15	2020-04-22	32609	3.30174e+08	2021-07-19	0	1
2020-04-23	879430	879430	879430	391021	0	170229	412884	13191450	30436	1.03063		1	2020-04-23	0.0399524	0.0399524	0	0.0632104	0.0187573	0.0297158	0.0125049	0.0250097	0	0.960048	1.01378	103300	0.0383579	1		0.998562	0.98945	0.0574769	0.0359644	0.0570121	2020-05-21	38996.8	2022-07-15	2020-04-23	30436	3.30179e+08	2021-07-19	0	1
2020-04-24	925038	925038	925038	402335	0	188015	423038	13875570	45608	1.16643		1	2020-04-24	0.0420237	0.0420237	0	0.0690557	0.0192183	0.142684	0.0128122	0.0256243	0	0.957976	1.03947	103600	0.0380511	1		0.997843	1.11741	0.0403853	0.0252946	0.0400546	2020-05-21	40819	2022-07-15	2020-04-24	45608	3.30184e+08	2021-07-19	0	1
2020-04-25	960525	960525	960525	417006	0	196260	429268	14407875	35487	1.09446		1	2020-04-25	0.0436351	0.0436351	0	0.0713009	0.019501	0.08631	0.0130006	0.0260013	0	0.956365	1.09853	103900	0.0377467	1		0.998318	1.04671	0.028305	0.0179096	0.0280741	2020-05-21	42225.5	2022-07-15	2020-04-25	35487	3.3019e+08	2021-07-19	0	1
2020-04-26	987322	987322	987322	427221	0	194563	426920	14809830	26797	1.02769		1	2020-04-26	0.0448517	0.0448517	0	0.069917	0.019394	0.0269414	0.0129293	0.0258586	0	0.955148	1.13045	104200	0.0374447	1		0.998728	0.981594	0.0198761	0.0128402	0.0197175	2020-05-21	43279.1	2022-07-15	2020-04-26	26797	3.30195e+08	2021-07-19	0	1
2020-04-27	1010356	1010356	1010356	434176	0	193971	425066	15155340	23034	0.999728		1	2020-04-27	0.0458973	0.0458973	0	0.0689481	0.0193094	0	0.012873	0.0257459	0	0.954103	1.06108	104500	0.0371451	1		0.998905	0.953843	0.0140488	0.00937982	0.0139416	2020-05-21	44177.5	2022-07-15	2020-04-27	23034	3.30201e+08	2021-07-19	0	1
2020-04-28	1035765	1035765	1035765	440444	0	186771	424020	15536475	25409	0.97696		1	2020-04-28	0.0470508	0.0470508	0	0.0656692	0.0192616	0	0.0128411	0.0256821	0	0.952949	1.01371	104800	0.036848	1		0.998791	0.930994	0.0100459	0.00702672	0.00997476	2020-05-21	45160.6	2022-07-15	2020-04-28	25409	3.30206e+08	2021-07-19	0	1
2020-04-29	1064194	1064194	1064194	448025	0	184764	420169	15962910	28429	0.979414		1	2020-04-29	0.0483415	0.0483415	0	0.0642599	0.0190864	0	0.0127242	0.0254485	0	0.951659	0.988344	105100	0.0365532	1		0.998646	0.932067	0.00730826	0.0054306	0.00726219	2020-05-21	46251.7	2022-07-15	2020-04-29	28429	3.30212e+08	2021-07-19	0	1
2020-04-30	1094464	1094464	1094464	456048	0	169426	418125	16416960	30270	0.984771		1	2020-04-30	0.0497157	0.0497157	0	0.0582876	0.0189932	0	0.0126621	0.0253243	0	0.950284	0.978187	105400	0.0362608	1		0.998556	0.935813	0.00544148	0.00434964	0.00541275	2020-05-21	47404.2	2022-07-15	2020-04-30	30270	3.30217e+08	2021-07-19	0	1
2020-05-01	1129882	1129882	1129882	463529	0	169357	420681	16948230	35418	1.0837		1	2020-05-01	0.0513237	0.0513237	0	0.0576337	0.019109	0	0.0127393	0.0254786	0	0.948676	0.982093	105700	0.0359707	1		0.998308	1.02808	0.00417115	0.00361814	0.00415436	2020-05-21	48741.9	2022-07-15	2020-05-01	35418	3.30222e+08	2021-07-19	0	0.9
2020-05-02	1160774	1160774	1160774	471138	0.4	173452	423751	17411610	30892	1.06598		1	2020-05-02	0.052726	0.052726	0	0.0583894	0.0192481	0	0.0128321	0.0256642	0	0.947274	1.03423	106000	0.0356829	1		0.998522	1.00978	0.00330788	0.00312305	0.00329927	2020-05-21	49899.3	2022-07-15	2020-05-02	30892	3.30228e+08	2021-07-19	0	0.9
2020-05-03	1186073	1186073	1186073	477864	0.4	175717	421808	17791095	25299	1.02671		1	2020-05-03	0.0538743	0.0538743	0	0.058513	0.0191595	0	0.012773	0.0255461	0	0.946126	1.07484	106300	0.0353974	1		0.998788	0.971393	0.00272166	0.00278757	0.00271865	2020-05-21	50839.6	2022-07-15	2020-05-03	25299	3.30233e+08	2021-07-19	0	0.9
2020-05-04	1210267	1210267	1210267	482599	0.4	174502	417508	18154005	24194	1.02358		1	2020-05-04	0.0549724	0.0549724	0	0.0574813	0.0189639	0	0.0126426	0.0252852	0	0.945028	1.04634	106600	0.0351143	1		0.998839	0.967307	0.00232361	0.00255972	0.00232443	2020-05-21	51731.7	2022-07-15	2020-05-04	24194	3.30239e+08	2021-07-19	0	0.9
2020-05-05	1236141	1236141	1236141	487873	0.4	171947	419756	18542115	25874	1.02619		1	2020-05-05	0.0561467	0.0561467	0	0.0560289	0.0190657	0	0.0127105	0.0254209	0	0.943853	1.02514	106900	0.0348334	1		0.998757	0.968572	0.0020532	0.00240436	0.00205661	2020-05-21	52678	2022-07-15	2020-05-05	25874	3.30244e+08	2021-07-19	0	0.9
2020-05-06	1263092	1263092	1263092	492290	0.4	168628	414098	18946380	26951	1.03035		1	2020-05-06	0.0573699	0.0573699	0	0.0543553	0.0188084	0	0.0125389	0.0250779	0	0.94263	1.02488	107200	0.0345547	1		0.998704	0.97124	0.00186925	0.00229777	0.00187442	2020-05-21	53655.9	2022-07-15	2020-05-06	26951	3.3025e+08	2021-07-19	0	0.9
2020-05-07	1292623	1292623	1292623	498350	0.4	162741	413193	19389345	29531	1.0619		1	2020-05-07	0.0587102	0.0587102	0	0.0518928	0.018767	0	0.0125113	0.0250227	0	0.94129	1.02827	107500	0.0342782	1		0.998578	0.99956	0.00174384	0.00222399	0.0017502	2020-05-21	54718.7	2022-07-15	2020-05-07	29531	3.30255e+08	2021-07-19	0	0.9
2020-05-08	1321497	1321497	1321497	503669	0.4	160723	396459	19822455	28874	1.07532		1	2020-05-08	0.0600207	0.0600207	0	0.0506978	0.0180067	0	0.0120044	0.0240089	0	0.939979	1.04613	107800	0.034004	1		0.998608	1.01077	0.00165804	0.00217225	0.0016652	2020-05-21	55749.7	2022-07-15	2020-05-08	28874	3.3026e+08	2021-07-19	0	0.9
2020-05-09	1347309	1347309	1347309	508588	0.4	161236	386784	20209635	25812	1.05956		1	2020-05-09	0.061192	0.061192	0	0.0503128	0.0175669	0	0.0117113	0.0234226	0	0.938808	1.06861	108100	0.033732	1		0.998754	0.994722	0.00159901	0.00213531	0.0016067	2020-05-21	56663.9	2022-07-15	2020-05-09	25812	3.30266e+08	2021-07-19	0	0.9
2020-05-10	1367406	1367406	1367406	512743	0.4	157139	380084	20511090	20097	1.00693		1	2020-05-10	0.0621038	0.0621038	0	0.0485074	0.0172624	0	0.0115082	0.0230165	0	0.937896	1.06744	108400	0.0334621	1		0.999029	0.944399	0.00155807	0.00210832	0.00156611	2020-05-21	57370	2022-07-15	2020-05-10	20097	3.30271e+08	2021-07-19	0	0.9
2020-05-11	1384033	1384033	1384033	515977	0.4	147892	373677	20760495	16627	0.961803		1	2020-05-11	0.0628579	0.0628579	0	0.0451628	0.0169711	0	0.0113141	0.0226281	0	0.937142	1.03325	108700	0.0331944	1		0.999196	0.901346	0.00152936	0.002088	0.00153762	2020-05-21	57949.5	2022-07-15	2020-05-11	16627	3.30277e+08	2021-07-19	0	0.9
2020-05-12	1408636	1408636	1408636	525067	0.4	145544	372871	21129540	24603	1.03434		1	2020-05-12	0.0639742	0.0639742	0	0.0439688	0.0169342	0	0.0112895	0.0225789	0	0.936026	0.984368	109000	0.0329289	1		0.998809	0.968166	0.0015089	0.00207216	0.0015173	2020-05-21	58800.2	2022-07-15	2020-05-12	24603	3.30282e+08	2021-07-19	0	0.9
2020-05-13	1430348	1430348	1430348	528564	0.4	137725	366154	21455220	21712	0.999399		1	2020-05-13	0.0649592	0.0649592	0	0.0411606	0.0166289	0	0.0110859	0.0221718	0	0.935041	0.99807	109300	0.0326654	1		0.998948	0.934479	0.00149401	0.00205932	0.0015025	2020-05-21	59544.9	2022-07-15	2020-05-13	21712	3.30288e+08	2021-07-19	0	0.9
2020-05-14	1454330	1454330	1454330	532032	0.4	132833	359866	21814950	23982	1.0391		1	2020-05-14	0.0660473	0.0660473	0	0.0392731	0.016343	0	0.0108954	0.0217907	0	0.933953	1.01687	109600	0.0324041	1		0.998836	0.970471	0.00148288	0.00204852	0.00149141	2020-05-21	60360.8	2022-07-15	2020-05-14	23982	3.30293e+08	2021-07-19	0	0.9
2020-05-15	1483994	1483994	1483994	537597	0.4	136685	354112	22259910	29664	1.14041		0	2020-05-15	0.0673933	0.0673933	0.2	0.0399793	0.0160815	0.025688	0.010721	0.0214419	0.2	0.932607	1.01925	109900	0.0321449	0.76		0.998559	1.06355	0.00147429	0.00203907	0.00148284	2020-05-21	61362.1	2022-07-15	2020-05-15	29664	3.30298e+08	2021-07-19	0	0.9
2020-05-16	1507773	1507773	1507773	541191	0.4	140367	346999	22616595	23779	1.08468		0	2020-05-16	0.0684721	0.0684721	0.2	0.0406169	0.0157582	0	0.0105054	0.0210109	0.2	0.931528	1.14041	110200	0.0318877	0.76		0.998843	1.01041	0.00146742	0.00203055	0.00147596	2020-05-21	62158.2	2022-07-15	2020-05-16	23779	3.30304e+08	2021-07-19	0	0.9
2020-05-17	1527664	1527664	1527664	545124	0.4	143631	341591	22914960	19891	1.05222		0	2020-05-17	0.0693742	0.0693742	0.2	0.041117	0.0155123	0	0.0103415	0.0206831	0.2	0.930626	1.08468	110500	0.0316326	0.76		0.999032	0.979227	0.0014617	0.00202266	0.00147023	2020-05-21	62818.9	2022-07-15	2020-05-17	19891	3.30309e+08	2021-07-19	0	0.9
2020-05-18	1550294	1550294	1550294	550710	0.4	141658	340027	23254410	22630	1.08192		0	2020-05-18	0.0704008	0.0704008	0.2	0.0401188	0.015441	0	0.010294	0.0205881	0.2	0.929599	1.05222	110800	0.0313796	0.76		0.998897	1.00575	0.00145677	0.00201519	0.00146527	2020-05-21	63564.5	2022-07-15	2020-05-18	22630	3.30315e+08	2021-07-19	0	0.9
2020-05-19	1570583	1570583	1570583	553743	0.4	140235	334442	23558745	20289	1.04341		0	2020-05-19	0.0713209	0.0713209	0.2	0.0392917	0.0151872	0	0.0101248	0.0202496	0.2	0.928679	1.08192	111100	0.0311285	0.76		0.99901	0.968996	0.00145236	0.00200801	0.00146084	2020-05-21	64227.7	2022-07-15	2020-05-19	20289	3.3032e+08	2021-07-19	0	0.9
2020-05-20	1592723	1592723	1592723	556898	0.4	138393	329631	23890845	22140	1.05752		0	2020-05-20	0.0723251	0.0723251	0.2	0.0383618	0.0149685	0	0.00997897	0.0199579	0.2	0.927675	1.04341	111400	0.0308795	0.76		0.998919	0.981034	0.00144832	0.00200105	0.00145676	2020-05-21	64945.5	2022-07-15	2020-05-20	22140	3.30326e+08	2021-07-19	0	0.9
2020-05-21	1620457	1620457	1620457	366298	0.4	136463	327834	24306855	27734	1.12971		0	2020-05-21	0.0735833	0.0735833	0.2	0.0374234	0.0148866	0.0164668	0.00992441	0.0198488	0.2	0.926417	1.05752	111700	0.0306325	0.76		0.998644	1.04659	0.00144452	0.00199423	0.00145293	2020-05-21	65837.6	2022-07-15	2020-05-21	27734	3.30331e+08	2021-07-19	0	0.9
2020-05-22	1.64215e+06	0		0	0.4	134381	320657	2.46323e+07	21697.1	1.14417		0	2020-05-22	0.0745673		0.2	0.0364598	0.0145605	0.0288896	0.00971818	0.0193853	0.2	0.925433	1.12971	112000	0.0303874	0.76		0.998938	1.05885	0.0014409	0.00198752	0.00144927	00:00:00	66529.9	2022-07-15	2020-05-22	-1620457	3.30336e+08	2021-07-19	0	0.9
2020-05-23	1.66424e+06	0		0	0.4	136573	316928	2.49635e+07	22082.6	1.18379		0	2020-05-23	0.0755688		0.2	0.0366597	0.0143909	0.061397	0.00961784	0.0191254	0.2	0.924431	1.12971	112300	0.0301443	0.76		0.998918	1.09433	0.00143738	0.00198089	0.00144572	00:00:00	67228.8	2022-07-15	2020-05-23	0	3.30342e+08	2021-07-19	0	0.9
2020-05-24	1.68725e+06	0		0	0.4	136959	319847	2.53088e+07	23016.3	1.21536		0	2020-05-24	0.0766127		0.2	0.0363722	0.0145232	0.0857767	0.0097201	0.0192619	0.2	0.923387	1.12971	112600	0.0299032	0.76		0.998871	1.12225	0.00143395	0.00197433	0.00144225	00:00:00	67951.5	2022-07-15	2020-05-24	0	3.30347e+08	2021-07-19	0	0.9
2020-05-25	1.71071e+06	0		0	0.4	140131	326681	2.56607e+07	23461.5	1.23677		0	2020-05-25	0.0776767		0.2	0.0368189	0.0148333	0.101604	0.00994172	0.0196296	0.2	0.922323	1.12971	112900	0.0296639	0.76		0.998848	1.1407	0.00143058	0.00196781	0.00143884	00:00:00	68682.2	2022-07-15	2020-05-25	0	3.30353e+08	2021-07-19	0	0.9
2020-05-26	1.73514e+06	0		0	0.4	142418	326505	2.60271e+07	24426.1	1.25992		0	2020-05-26	0.0787845		0.2	0.0370218	0.014825	0.118113	0.00995338	0.0195637	0.2	0.921215	1.12971	113200	0.0294266	0.76		0.998799	1.16066	0.00142725	0.00196135	0.00143547	00:00:00	69437	2022-07-15	2020-05-26	0	3.30358e+08	2021-07-19	0	0.9
2020-05-27	1.76031e+06	0		0	0.4	139853	329962	2.64046e+07	25169.3	1.27896		0	2020-05-27	0.079926		0.2	0.0359689	0.0149818	0.131237	0.0100776	0.0197077	0.2	0.920074	1.12971	113500	0.0291912	0.76		0.998761	1.17674	0.00142396	0.00195492	0.00143213	00:00:00	70208.4	2022-07-15	2020-05-27	0	3.30364e+08	2021-07-19	0	0.9
2020-05-28	1.7853e+06	0		0	0.4	143148	330972	2.67795e+07	24992.3	1.29486		0	2020-05-28	0.0810594		0.2	0.0364256	0.0150274	0.141904	0.0101306	0.0196923	0.2	0.918941	1.12971	113800	0.0289577	0.76		0.998768	1.1899	0.00142068	0.00194852	0.00142882	00:00:00	70968.3	2022-07-15	2020-05-28	0	3.30369e+08	2021-07-19	0	0.9
2020-05-29	1.81114e+06	0		0	0.4	146902	327144	2.71671e+07	25836.2	1.30938		0	2020-05-29	0.0822312		0.2	0.0369842	0.0148533	0.15142	0.0100391	0.0193742	0.2	0.917769	1.12971	114100	0.028726	0.76		0.998725	1.20171	0.00141743	0.00194217	0.00142553	00:00:00	71747.6	2022-07-15	2020-05-29	0	3.30375e+08	2021-07-19	0	0.9
2020-05-30	1.83787e+06	0		0	0.4	150615	330095	2.7568e+07	26729.9	1.32174		0	2020-05-30	0.0834434		0.2	0.0375172	0.0149871	0.159358	0.0101549	0.0194559	0.2	0.916557	1.12971	114400	0.0284962	0.76		0.998679	1.21145	0.00141419	0.00193584	0.00142226	00:00:00	72547.4	2022-07-15	2020-05-30	0	3.3038e+08	2021-07-19	0	0.9
2020-05-31	1.86546e+06	0		0	0.4	154745	337795	2.79819e+07	27590.9	1.33244		0	2020-05-31	0.0846947		0.2	0.0381374	0.0153364	0.166106	0.0104168	0.0198133	0.2	0.915305	1.12971	114700	0.0282682	0.76		0.998635	1.21959	0.00141097	0.00192954	0.001419	00:00:00	73366.3	2022-07-15	2020-05-31	0	3.30385e+08	2021-07-19	0	0.9
2020-06-01	1.8908e+06	0		0	0.4	155659	340506	2.8362e+07	25340.7	1.34183		0	2020-06-01	0.0858438		0.2	0.0379567	0.0154592	0.0684372	0.0105269	0.0198692	0.2	0.914156	1.12971	115000	0.0280421	0.76		0.998745	1.22664	0.00140777	0.00192327	0.00141575	00:00:00	74112.5	2022-07-15	2020-06-01	0	3.30391e+08	2021-07-19	0	0.8
2020-06-02	1.91641e+06	0		0	0.4	156103	345829	2.87462e+07	25612.4	1.34994		0	2020-06-02	0.0870052		0.2	0.037662	0.0157007	0.0740362	0.0107178	0.0200739	0.2	0.912995	1.12971	115300	0.0278178	0.76		0.99873	1.23249	0.00140457	0.00191703	0.00141251	00:00:00	74860.6	2022-07-15	2020-06-02	0	3.30396e+08	2021-07-19	0	0.8
2020-06-03	1.9422e+06	0		0	0.4	156897	349476	2.9133e+07	25786.7	1.357		0	2020-06-03	0.0881745		0.2	0.0374533	0.015866	0.0788476	0.0108598	0.020168	0.2	0.911826	1.12971	115600	0.0275952	0.76		0.998719	1.23734	0.00140138	0.00191082	0.00140929	00:00:00	75607.7	2022-07-15	2020-06-03	0	3.30402e+08	2021-07-19	0	0.8
2020-06-04	1.9682e+06	0		0	0.4	157063	347744	2.9523e+07	26001.8	1.36314		0	2020-06-04	0.0893535		0.2	0.0370966	0.0157871	0.0829967	0.0108407	0.0199275	0.2	0.910647	1.12971	115900	0.0273745	0.76		0.998707	1.24133	0.00139821	0.00190463	0.00140608	00:00:00	76355.1	2022-07-15	2020-06-04	0	3.30407e+08	2021-07-19	0	0.8
2020-06-05	1.9943e+06	0		0	0.4	156430	352144	2.99145e+07	26097.2	1.36846		0	2020-06-05	0.0905367		0.2	0.036557	0.0159866	0.0865657	0.0109976	0.0200782	0.2	0.909463	1.12971	116200	0.0271555	0.76		0.998701	1.24457	0.00139505	0.00189848	0.00140288	00:00:00	77099.2	2022-07-15	2020-06-05	0	3.30413e+08	2021-07-19	0	0.8
2020-06-06	2.02034e+06	0		0	0.4	154885	356108	3.03052e+07	26046.1	1.37309		0	2020-06-06	0.0917177		0.2	0.0358139	0.0161662	0.0896453	0.0111412	0.0201996	0.2	0.908282	1.12971	116500	0.0269382	0.76		0.998702	1.24715	0.00139189	0.00189235	0.00139969	00:00:00	77835.9	2022-07-15	2020-06-06	0	3.30418e+08	2021-07-19	0	0.8
2020-06-07	2.04618e+06	0		0	0.4	155375	358922	3.06926e+07	25830.9	1.37711		0	2020-06-07	0.0928888		0.2	0.0355483	0.0162937	0.0923052	0.0112502	0.02025	0.2	0.907111	1.12971	116800	0.0267227	0.76		0.998711	1.2492	0.00138875	0.00188625	0.00139651	00:00:00	78560.7	2022-07-15	2020-06-07	0	3.30423e+08	2021-07-19	0	0.8
2020-06-08	2.07212e+06	0		0	0.4	155708	361406	3.10818e+07	25944.9	1.38061		0	2020-06-08	0.094065		0.2	0.0352488	0.0164062	0.0946029	0.0113502	0.0202774	0.2	0.905935	1.12971	117100	0.0265089	0.76		0.998703	1.25074	0.00138562	0.00188017	0.00139334	00:00:00	79282.9	2022-07-15	2020-06-08	0	3.30429e+08	2021-07-19	0	0.8
2020-06-09	2.09814e+06	0		0	0.4	155945	363003	3.14722e+07	26023.8	1.38365		0	2020-06-09	0.0952448		0.2	0.0349306	0.0164785	0.0965902	0.0114229	0.0202513	0.2	0.904755	1.12971	117400	0.0262969	0.76		0.998698	1.25186	0.0013825	0.00187412	0.00139018	00:00:00	80001.5	2022-07-15	2020-06-09	0	3.30434e+08	2021-07-19	0	0.8
2020-06-10	2.12422e+06	0		0	0.4	156022	363913	3.18633e+07	26079.1	1.38629		0	2020-06-10	0.0964271		0.2	0.03458	0.0165195	0.0983099	0.0114742	0.020185	0.2	0.903573	1.12971	117700	0.0260865	0.76		0.998693	1.25261	0.00137938	0.0018681	0.00138703	00:00:00	80715.8	2022-07-15	2020-06-10	0	3.3044e+08	2021-07-19	0	0.8
2020-06-11	2.15032e+06	0		0	0.4	156026	365022	3.22549e+07	26101.1	1.38858		0	2020-06-11	0.0976103		0.2	0.034217	0.0165695	0.0997987	0.0115306	0.0201332	0.2	0.90239	1.12971	118000	0.0258778	0.76		0.998691	1.25304	0.00137628	0.00186211	0.00138389	00:00:00	81425	2022-07-15	2020-06-11	0	3.30445e+08	2021-07-19	0	0.8
2020-06-12	2.17643e+06	0		0	0.4	156085	365290	3.26464e+07	26104.9	1.39057		0	2020-06-12	0.0987937		0.2	0.0338699	0.0165815	0.101088	0.0115617	0.0200317	0.2	0.901206	1.12971	118300	0.0256708	0.76		0.998689	1.25319	0.00137318	0.00185614	0.00138076	00:00:00	82128.6	2022-07-15	2020-06-12	0	3.30451e+08	2021-07-19	0	0.8
2020-06-13	2.20254e+06	0		0	0.4	156367	364674	3.30381e+07	26113	1.3923		0	2020-06-13	0.0999774		0.2	0.0335746	0.0165532	0.102206	0.011566	0.0198785	0.2	0.900023	1.12971	118600	0.0254654	0.76		0.998687	1.2531	0.0013701	0.00185019	0.00137764	00:00:00	82826.9	2022-07-15	2020-06-13	0	3.30456e+08	2021-07-19	0	0.8
2020-06-14	2.2287e+06	0		0	0.4	156576	363237	3.34304e+07	26154	1.39381		0	2020-06-14	0.101163		0.2	0.0332664	0.0164877	0.103175	0.0115453	0.0196786	0.2	0.898837	1.12971	118900	0.0252617	0.76		0.998683	1.2528	0.00136703	0.00184428	0.00137452	00:00:00	83520.6	2022-07-15	2020-06-14	0	3.30461e+08	2021-07-19	0	0.8
2020-06-15	2.25552e+06	0		0	0.4	157374	364718	3.38328e+07	26821.9	1.42937		0	2020-06-15	0.102379		0.3	0.033085	0.0165547	0.125488	0.0116187	0.019649	0.3	0.897621	1.12971	119200	0.0250596	0.64		0.998647	1.28303	0.00136396	0.00183839	0.00137142	00:00:00	84226.3	2022-07-15	2020-06-15	0	3.30467e+08	2021-07-19	0	0.8
2020-06-16	2.28262e+06	0		0	0.4	158400	366210	3.42393e+07	27104.8	1.43907		0	2020-06-16	0.103607		0.3	0.0329512	0.0166221	0.131383	0.0116941	0.0196215	0.3	0.896393	1.12971	119500	0.0248591	0.64		0.998631	1.28997	0.00136091	0.00183252	0.00136833	00:00:00	84933.8	2022-07-15	2020-06-16	0	3.30472e+08	2021-07-19	0	0.8
2020-06-17	2.31009e+06	0		0	0.4	159764	367889	3.46513e+07	27465.5	1.45076		0	2020-06-17	0.104852		0.3	0.0328866	0.0166981	0.138383	0.0117775	0.0196067	0.3	0.895148	1.12971	119800	0.0246602	0.64		0.998611	1.29865	0.00135786	0.00182668	0.00136525	00:00:00	85645	2022-07-15	2020-06-17	0	3.30478e+08	2021-07-19	0	0.8
2020-06-18	2.33802e+06	0		0	0.4	161594	369822	3.50703e+07	27935.1	1.465		0	2020-06-18	0.106118		0.3	0.0329148	0.0167855	0.146757	0.0118718	0.0196089	0.3	0.893882	1.12971	120100	0.0244629	0.64		0.998585	1.30954	0.00135482	0.00182086	0.00136218	00:00:00	86362.5	2022-07-15	2020-06-18	0	3.30483e+08	2021-07-19	0	0.8
2020-06-19	2.36641e+06	0		0	0.4	163868	372112	3.54961e+07	28386.7	1.47391		0	2020-06-19	0.107405		0.3	0.0330284	0.0168892	0.151914	0.0119802	0.0196334	0.3	0.892595	1.12971	120400	0.0242672	0.64		0.998561	1.3156	0.0013518	0.00181507	0.00135912	00:00:00	87085.9	2022-07-15	2020-06-19	0	3.30489e+08	2021-07-19	0	0.8
2020-06-20	2.39532e+06	0		0	0.4	166628	374980	3.59299e+07	28914.5	1.48262		0	2020-06-20	0.108716		0.3	0.0332334	0.0170191	0.156896	0.0121102	0.0196935	0.3	0.891284	1.12971	120700	0.0240731	0.64		0.998532	1.32143	0.00134878	0.00180931	0.00135606	00:00:00	87816.7	2022-07-15	2020-06-20	0	3.30494e+08	2021-07-19	0	0.8
2020-06-21	2.42484e+06	0		0	0.4	169323	378665	3.63726e+07	29516.2	1.49058		0	2020-06-21	0.110053		0.3	0.0334175	0.0171861	0.161401	0.0122696	0.0198027	0.3	0.889947	1.12971	121000	0.0238805	0.64		0.998499	1.32654	0.00134577	0.00180357	0.00135302	00:00:00	88556.8	2022-07-15	2020-06-21	0	3.30499e+08	2021-07-19	0	0.8
2020-06-22	2.45492e+06	0		0	0.4	172295	382797	3.68238e+07	30076.9	1.49698		0	2020-06-22	0.111417		0.3	0.0336486	0.0173733	0.164983	0.0124471	0.01994	0.3	0.888583	1.12971	121300	0.0236895	0.64		0.998468	1.33019	0.00134277	0.00179785	0.00134998	00:00:00	89305	2022-07-15	2020-06-22	0	3.30505e+08	2021-07-19	0	0.8
2020-06-23	2.48559e+06	0		0	0.4	175505	387449	3.72839e+07	30675.7	1.50274		0	2020-06-23	0.112807		0.3	0.0339175	0.0175841	0.168188	0.0126453	0.0201096	0.3	0.887193	1.12971	121600	0.0235	0.64		0.998435	1.33322	0.00133978	0.00179216	0.00134696	00:00:00	90061.9	2022-07-15	2020-06-23	0	3.3051e+08	2021-07-19	0	0.8
2020-06-24	2.5169e+06	0		0	0.4	178873	392673	3.77534e+07	31302.8	1.50778		0	2020-06-24	0.114226		0.3	0.0342073	0.0178209	0.170964	0.0128663	0.0203144	0.3	0.885774	1.12971	121900	0.023312	0.64		0.998401	1.33555	0.0013368	0.00178649	0.00134394	00:00:00	90828.1	2022-07-15	2020-06-24	0	3.30516e+08	2021-07-19	0	0.8
2020-06-25	2.54884e+06	0		0	0.4	182429	398515	3.82326e+07	31943.2	1.51207		0	2020-06-25	0.115674		0.3	0.0345234	0.0180858	0.173321	0.0131119	0.0205569	0.3	0.884326	1.12971	122200	0.0231255	0.64		0.998366	1.33717	0.00133383	0.00178085	0.00134094	00:00:00	91603.7	2022-07-15	2020-06-25	0	3.30521e+08	2021-07-19	0	0.8
2020-06-26	2.58145e+06	0		0	0.4	186121	405017	3.87217e+07	32606.3	1.51585		0	2020-06-26	0.117151		0.3	0.0348547	0.0183805	0.175379	0.0133838	0.0208395	0.3	0.882849	1.12971	122500	0.0229405	0.64		0.998329	1.33826	0.00133086	0.00177523	0.00133794	00:00:00	92389.1	2022-07-15	2020-06-26	0	3.30527e+08	2021-07-19	0	0.8
2020-06-27	2.61473e+06	0		0	0.4	189887	412186	3.92209e+07	33282.3	1.51912		0	2020-06-27	0.11866		0.3	0.0351893	0.0187056	0.177157	0.0136827	0.0211625	0.3	0.88134	1.12971	122800	0.0227569	0.64		0.998291	1.33886	0.00132791	0.00176963	0.00133495	00:00:00	93184.4	2022-07-15	2020-06-27	0	3.30532e+08	2021-07-19	0	0.8
2020-06-28	2.64869e+06	0		0	0.4	193771	419993	3.97303e+07	33961.1	1.52196		0	2020-06-28	0.120199		0.3	0.0355351	0.0190595	0.178691	0.0140081	0.0215241	0.3	0.879801	1.12971	123100	0.0225749	0.64		0.998254	1.33902	0.00132497	0.00176406	0.00133197	00:00:00	93989.4	2022-07-15	2020-06-28	0	3.30537e+08	2021-07-19	0	0.8
2020-06-29	2.68334e+06	0		0	0.4	197747	427822	4.02501e+07	34651.4	1.52443		0	2020-06-29	0.12177		0.3	0.0358866	0.0194145	0.180023	0.0143391	0.0218838	0.3	0.87823	1.12971	123400	0.0223943	0.64		0.998215	1.3388	0.00132203	0.00175852	0.001329	00:00:00	94804.2	2022-07-15	2020-06-29	0	3.30543e+08	2021-07-19	0	0.8
2020-06-30	2.71869e+06	0		0	0.4	201793	436067	4.07803e+07	35349	1.52658		0	2020-06-30	0.123372		0.3	0.0362398	0.0197883	0.181176	0.0146896	0.0222672	0.3	0.876628	1.12971	123700	0.0222151	0.64		0.998176	1.33824	0.0013191	0.00175299	0.00132604	00:00:00	95628.7	2022-07-15	2020-06-30	0	3.30548e+08	2021-07-19	0	0.8
2020-07-01	2.75474e+06	0		0	0.4	205901	444652	4.13211e+07	36050.4	1.52844		0	2020-07-01	0.125006		0.3	0.0365929	0.0201776	0.182175	0.0150573	0.0226696	0.3	0.874994	1.12971	124000	0.0220374	0.64		0.998136	1.33738	0.00131618	0.00174749	0.00132309	00:00:00	96462.9	2022-07-15	2020-07-01	0	3.30554e+08	2021-07-19	0	0.8
2020-07-02	2.79149e+06	0		0	0.4	210049	453471	4.18724e+07	36754.5	1.53006		0	2020-07-02	0.126671		0.3	0.0369421	0.0205774	0.183041	0.0154389	0.0230841	0.3	0.873329	1.12971	124300	0.0218611	0.64		0.998096	1.33625	0.00131328	0.00174201	0.00132015	00:00:00	97306.6	2022-07-15	2020-07-02	0	3.30559e+08	2021-07-19	0	0.8
2020-07-03	2.82895e+06	0		0	0.4	214225	462542	4.24343e+07	37458.1	1.53147		0	2020-07-03	0.128369		0.3	0.0372851	0.0209887	0.183792	0.0158354	0.0235118	0.3	0.871631	1.12971	124600	0.0216862	0.64		0.998056	1.33488	0.00131037	0.00173656	0.00131721	00:00:00	98159.5	2022-07-15	2020-07-03	0	3.30565e+08	2021-07-19	0	0.8
2020-07-04	2.86711e+06	0		0	0.4	218422	471787	4.30067e+07	38158.9	1.53269		0	2020-07-04	0.130098		0.3	0.037621	0.0214079	0.184443	0.0162442	0.0239477	0.3	0.869902	1.12971	124900	0.0215127	0.64		0.998016	1.33329	0.00130748	0.00173112	0.00131429	00:00:00	99021.5	2022-07-15	2020-07-04	0	3.3057e+08	2021-07-19	0	0.8
2020-07-05	2.90597e+06	0		0	0.4	222627	481127	4.35895e+07	38856.4	1.53376		0	2020-07-05	0.131859		0.3	0.0379474	0.0218313	0.185008	0.016663	0.024387	0.3	0.868141	1.12971	125200	0.0213406	0.64		0.997976	1.33152	0.0013046	0.00172572	0.00131137	00:00:00	99892.2	2022-07-15	2020-07-05	0	3.30576e+08	2021-07-19	0	0.8
2020-07-06	2.94552e+06	0		0	0.4	226826	490598	4.41827e+07	39548.1	1.53468		0	2020-07-06	0.133652		0.3	0.0382621	0.0222607	0.185498	0.0170933	0.0248319	0.3	0.866348	1.12971	125500	0.0211699	0.64		0.997935	1.32957	0.00130173	0.00172033	0.00130847	00:00:00	100771	2022-07-15	2020-07-06	0	3.30581e+08	2021-07-19	0	0.8
2020-07-07	2.98575e+06	0		0	0.4	231008	500154	4.47862e+07	40231.9	1.53548		0	2020-07-07	0.135475		0.3	0.0385635	0.022694	0.185924	0.0175338	0.0252796	0.3	0.864525	1.12971	125800	0.0210005	0.64		0.997895	1.32746	0.00129886	0.00171496	0.00130557	00:00:00	101658	2022-07-15	2020-07-07	0	3.30586e+08	2021-07-19	0	0.8
2020-07-08	3.02665e+06	0		0	0.4	235159	509757	4.53998e+07	40905.8	1.53618		0	2020-07-08	0.137329		0.3	0.0388498	0.0231293	0.186293	0.0179833	0.0257277	0.3	0.862671	1.12971	126100	0.0208325	0.64		0.997856	1.32522	0.001296	0.00170962	0.00130268	00:00:00	102553	2022-07-15	2020-07-08	0	3.30592e+08	2021-07-19	0	0.8
2020-07-09	3.06822e+06	0		0	0.4	239269	519382	4.60233e+07	41568	1.53679		0	2020-07-09	0.139213		0.3	0.0391195	0.0235656	0.186614	0.0184413	0.0261749	0.3	0.860787	1.12971	126400	0.0206659	0.64		0.997816	1.32285	0.00129316	0.0017043	0.0012998	00:00:00	103455	2022-07-15	2020-07-09	0	3.30597e+08	2021-07-19	0	0.8
2020-07-10	3.11044e+06	0		0	0.4	243327	528993	4.66566e+07	42216.6	1.53731		0	2020-07-10	0.141126		0.3	0.0393712	0.0240013	0.186893	0.0189066	0.0266189	0.3	0.858874	1.12971	126700	0.0205006	0.64		0.997777	1.32036	0.00129032	0.001699	0.00129693	00:00:00	104364	2022-07-15	2020-07-10	0	3.30603e+08	2021-07-19	0	0.8
2020-07-11	3.15329e+06	0		0	0.4	247320	538560	4.72993e+07	42849.9	1.53777		0	2020-07-11	0.143068		0.3	0.0396035	0.024435	0.187134	0.0193785	0.027058	0.3	0.856932	1.12971	127000	0.0203366	0.64		0.997739	1.31776	0.00128748	0.00169373	0.00129406	00:00:00	105279	2022-07-15	2020-07-11	0	3.30608e+08	2021-07-19	0	0.8
2020-07-12	3.19675e+06	0		0	0.4	251238	548065	4.79513e+07	43465.9	1.53817		0	2020-07-12	0.145037		0.3	0.0398149	0.0248658	0.187344	0.0198565	0.0274911	0.3	0.854963	1.12971	127300	0.0201739	0.64		0.997701	1.31508	0.00128466	0.00168848	0.00129121	00:00:00	106200	2022-07-15	2020-07-12	0	3.30614e+08	2021-07-19	0	0.8
2020-07-13	3.24082e+06	0		0	0.4	255069	557476	4.86122e+07	44062.8	1.53851		0	2020-07-13	0.147034		0.3	0.0400044	0.0252924	0.187527	0.0203395	0.0279165	0.3	0.852966	1.12971	127600	0.0200125	0.64		0.997665	1.3123	0.00128185	0.00168324	0.00128836	00:00:00	107126	2022-07-15	2020-07-13	0	3.30619e+08	2021-07-19	0	0.8
2020-07-14	3.28546e+06	0		0	0.4	258802	566766	4.92818e+07	44638.9	1.53881		0	2020-07-14	0.149057		0.3	0.0401707	0.0257135	0.187685	0.0208268	0.0283326	0.3	0.850943	1.12971	127900	0.0198524	0.64		0.997629	1.30944	0.00127904	0.00167803	0.00128552	00:00:00	108056	2022-07-15	2020-07-14	0	3.30624e+08	2021-07-19	0	0.8
2020-07-15	3.33065e+06	0		0	0.4	262427	575908	4.99597e+07	45192.5	1.53907		0	2020-07-15	0.151105		0.3	0.0403129	0.0261278	0.187823	0.0213173	0.0287379	0.3	0.848895	1.12971	128200	0.0196935	0.64		0.997593	1.30651	0.00127624	0.00167284	0.0012827	00:00:00	108991	2022-07-15	2020-07-15	0	3.3063e+08	2021-07-19	0	0.8
2020-07-16	3.37637e+06	0		0	0.4	265932	584876	5.06455e+07	45721.8	1.5393		0	2020-07-16	0.153176		0.3	0.0404299	0.0265342	0.187942	0.0218104	0.0291309	0.3	0.846824	1.12971	128500	0.019536	0.64		0.997559	1.30351	0.00127345	0.00166768	0.00127987	00:00:00	109928	2022-07-15	2020-07-16	0	3.30635e+08	2021-07-19	0	0.8
2020-07-17	3.4226e+06	0		0	0.4	269307	593643	5.13389e+07	46225.4	1.5395		0	2020-07-17	0.155271		0.3	0.040521	0.0269315	0.188046	0.022305	0.0295103	0.3	0.844729	1.12971	128800	0.0193797	0.64		0.997527	1.30046	0.00127067	0.00166253	0.00127706	00:00:00	110869	2022-07-15	2020-07-17	0	3.30641e+08	2021-07-19	0	0.8
2020-07-18	3.4693e+06	0		0	0.4	272543	602186	5.20395e+07	46701.5	1.53967		0	2020-07-18	0.157387		0.3	0.0405852	0.0273186	0.188136	0.0228003	0.0298747	0.3	0.842613	1.12971	129100	0.0192247	0.64		0.997495	1.29734	0.0012679	0.0016574	0.00127426	00:00:00	111812	2022-07-15	2020-07-18	0	3.30646e+08	2021-07-19	0	0.8
2020-07-19	3.51645e+06	0		0	0.4	275629	610478	5.27467e+07	47148.8	1.53982		0	2020-07-19	0.159523		0.3	0.040622	0.0276943	0.188214	0.0232953	0.0302229	0.3	0.840477	1.12971	129400	0.0190709	0.64		0.997465	1.29418	0.00126513	0.0016523	0.00127146	00:00:00	112756	2022-07-15	2020-07-19	0	3.30652e+08	2021-07-19	0	0.8
2020-07-20	3.56401e+06	0		0	0.4	278556	618496	5.34602e+07	47565.7	1.53994		0	2020-07-20	0.161679		0.3	0.0406307	0.0280576	0.188282	0.023789	0.0305535	0.3	0.838321	1.12971	129700	0.0189183	0.64		0.997436	1.29097	0.00126238	0.00164722	0.00126868	00:00:00	113701	2022-07-15	2020-07-20	0	3.30657e+08	2021-07-19	0	0.8
2020-07-21	3.61196e+06	0		0	0.4	281314	626215	5.41794e+07	47951.1	1.54006		0	2020-07-21	0.163851		0.3	0.0406109	0.0284073	0.188342	0.0242805	0.0308654	0.3	0.836149	1.12971	130000	0.018767	0.64		0.997408	1.28772	0.00125963	0.00164215	0.0012659	00:00:00	114646	2022-07-15	2020-07-21	0	3.30662e+08	2021-07-19	0	0.8
2020-07-22	3.66027e+06	0		0	0.4	283896	633612	5.4904e+07	48303.5	1.54015		0	2020-07-22	0.16604		0.3	0.0405621	0.0287424	0.188393	0.0247687	0.0311575	0.3	0.83396	1.12971	130300	0.0186168	0.64		0.997383	1.28443	0.00125689	0.00163711	0.00126313	00:00:00	115590	2022-07-15	2020-07-22	0	3.30668e+08	2021-07-19	0	0.8
2020-07-23	3.70889e+06	0		0	0.4	286292	640666	5.56333e+07	48621.8	1.54024		0	2020-07-23	0.168243		0.3	0.0404841	0.0290619	0.188437	0.0252525	0.0314286	0.3	0.831757	1.12971	130600	0.0184679	0.64		0.997359	1.28111	0.00125416	0.00163209	0.00126036	00:00:00	116533	2022-07-15	2020-07-23	0	3.30673e+08	2021-07-19	0	0.8
2020-07-24	3.75779e+06	0		0	0.4	288496	647355	5.63669e+07	48905.1	1.54031		0	2020-07-24	0.170458		0.3	0.0403765	0.0293648	0.188476	0.0257311	0.0316779	0.3	0.829542	1.12971	130900	0.0183201	0.64		0.997336	1.27775	0.00125143	0.00162709	0.00125761	00:00:00	117473	2022-07-15	2020-07-24	0	3.30679e+08	2021-07-19	0	0.8
2020-07-25	3.80695e+06	0		0	0.4	290499	653657	5.71042e+07	49152.3	1.54038		0	2020-07-25	0.172685		0.3	0.0402395	0.0296502	0.18851	0.0262031	0.0319043	0.3	0.827315	1.12971	131200	0.0181736	0.64		0.997316	1.27438	0.00124872	0.00162211	0.00125486	00:00:00	118411	2022-07-15	2020-07-25	0	3.30684e+08	2021-07-19	0	0.8
2020-07-26	3.85631e+06	0		0	0.4	292296	659554	5.78446e+07	49362.5	1.54043		0	2020-07-26	0.174921		0.3	0.0400728	0.0299172	0.188539	0.0266677	0.032107	0.3	0.825079	1.12971	131500	0.0180282	0.64		0.997297	1.27098	0.00124601	0.00161715	0.00125213	00:00:00	119346	2022-07-15	2020-07-26	0	3.3069e+08	2021-07-19	0	0.8
2020-07-27	3.90584e+06	0		0	0.4	293880	665026	5.85876e+07	49535.2	1.54048		0	2020-07-27	0.177165		0.3	0.0398767	0.0301649	0.188565	0.0271237	0.0322853	0.3	0.822835	1.12971	131800	0.017884	0.64		0.99728	1.26756	0.00124331	0.0016122	0.0012494	00:00:00	120276	2022-07-15	2020-07-27	0	3.30695e+08	2021-07-19	0	0.8
2020-07-28	3.95551e+06	0		0	0.4	295246	670057	5.93327e+07	49669.5	1.54052		0	2020-07-28	0.179415		0.3	0.0396513	0.0303926	0.188587	0.02757	0.0324384	0.3	0.820585	1.12971	132100	0.0177409	0.64		0.997266	1.26413	0.00124062	0.00160728	0.00124667	00:00:00	121201	2022-07-15	2020-07-28	0	3.30701e+08	2021-07-19	0	0.8
2020-07-29	4.00528e+06	0		0	0.4	296390	674629	6.00792e+07	49765.1	1.54056		0	2020-07-29	0.181669		0.3	0.0393969	0.0305995	0.188606	0.0280055	0.0325658	0.3	0.818331	1.12971	132400	0.017599	0.64		0.997253	1.26069	0.00123793	0.00160238	0.00124396	00:00:00	122121	2022-07-15	2020-07-29	0	3.30706e+08	2021-07-19	0	0.8
2020-07-30	4.0551e+06	0		0	0.4	297306	678729	6.08265e+07	49821.6	1.54059		0	2020-07-30	0.183926		0.3	0.039114	0.030785	0.188623	0.0284292	0.032667	0.3	0.816074	1.12971	132700	0.0174582	0.64		0.997242	1.25724	0.00123526	0.0015975	0.00124125	00:00:00	123034	2022-07-15	2020-07-30	0	3.30711e+08	2021-07-19	0	0.8
2020-07-31	4.10494e+06	0		0	0.4	297993	682342	6.15741e+07	49838.7	1.54062		0	2020-07-31	0.186184		0.3	0.0388029	0.0309483	0.188637	0.0288398	0.0327414	0.3	0.813816	1.12971	133000	0.0173185	0.64		0.997234	1.25378	0.00123259	0.00159264	0.00123856	00:00:00	123940	2022-07-15	2020-07-31	0	3.30717e+08	2021-07-19	0	0.8
2020-08-01	4.15475e+06	0		0	0.4	298446	685457	6.23213e+07	49816.4	1.54064		0	2020-08-01	0.18844		0.3	0.0384644	0.0310891	0.18865	0.0292364	0.0327889	0.3	0.81156	1.12971	133300	0.01718	0.64		0.997227	1.25032	0.00122993	0.0015878	0.00123587	00:00:00	124839	2022-07-15			3.30722e+08	2021-07-19	0	0.8
2020-08-02	4.20451e+06	0		0	0.4	298666	688063	6.30676e+07	49754.6	1.54066		0	2020-08-02	0.190694		0.3	0.038099	0.0312068	0.188661	0.0296179	0.0328092	0.3	0.809306	1.12971	133600	0.0170425	0.64		0.997223	1.24687	0.00122727	0.00158297	0.00123318	00:00:00	125729	2022-07-15			3.30728e+08	2021-07-19	0	0.8
2020-08-03	4.25416e+06	0		0	0.4	298650	690151	6.38124e+07	49653.5	1.54068		0	2020-08-03	0.192942		0.3	0.0377075	0.031301	0.18867	0.0299832	0.0328021	0.3	0.807058	1.12971	133900	0.0169062	0.64		0.997221	1.24342	0.00122463	0.00157817	0.00123051	00:00:00	126611	2022-07-15			3.30733e+08	2021-07-19	0	0.8
2020-08-04	4.30368e+06	0		0	0.4	298398	691713	6.45551e+07	49513.4	1.5407		0	2020-08-04	0.195185		0.3	0.0372907	0.0313713	0.188678	0.0303313	0.0327676	0.3	0.804815	1.12971	134200	0.0167709	0.64		0.997221	1.23998	0.00122199	0.00157338	0.00122784	00:00:00	127483	2022-07-15			3.30739e+08	2021-07-19	0	0.8
2020-08-05	4.35301e+06	0		0	0.4	297911	692744	6.52952e+07	49334.6	1.54071		0	2020-08-05	0.197419		0.3	0.0368497	0.0314175	0.188685	0.0306612	0.0327057	0.3	0.802581	1.12971	134500	0.0166368	0.64		0.997224	1.23654	0.00121936	0.00156862	0.00122518	00:00:00	128344	2022-07-15			3.30744e+08	2021-07-19	0	0.8
2020-08-06	4.40213e+06	0		0	0.4	297190	693240	6.60319e+07	49117.8	1.54072		0	2020-08-06	0.199643		0.3	0.0363853	0.0314395	0.188692	0.030972	0.0326167	0.3	0.800357	1.12971	134800	0.0165037	0.64		0.997229	1.23313	0.00121674	0.00156387	0.00122253	00:00:00	129196	2022-07-15			3.30749e+08	2021-07-19	0	0.8
2020-08-07	4.45099e+06	0		0	0.4	296237	693199	6.67649e+07	48863.4	1.54073		0	2020-08-07	0.201856		0.3	0.0358985	0.0314371	0.188697	0.0312628	0.0325007	0.3	0.798144	1.12971	135100	0.0163716	0.64		0.997235	1.22973	0.00121412	0.00155914	0.00121989	00:00:00	130036	2022-07-15			3.30755e+08	2021-07-19	0	0.8
2020-08-08	4.49956e+06	0		0	0.4	295055	692619	6.74935e+07	48572.4	1.54074		0	2020-08-08	0.204055		0.3	0.0353906	0.0314103	0.188702	0.0315326	0.0323582	0.3	0.795945	1.12971	135400	0.0162407	0.64		0.997244	1.22634	0.00121152	0.00155443	0.00121725	00:00:00	130864	2022-07-15			3.3076e+08	2021-07-19	0	0.8
2020-08-09	4.54781e+06	0		0	0.4	293647	691502	6.82171e+07	48245.4	1.54075		0	2020-08-09	0.20624		0.3	0.0348627	0.0313591	0.188706	0.0317807	0.0321894	0.3	0.79376	1.12971	135700	0.0161108	0.64		0.997255	1.22298	0.00120892	0.00154974	0.00121463	00:00:00	131680	2022-07-15			3.30766e+08	2021-07-19	0	0.8
2020-08-10	4.59569e+06	0		0	0.4	292017	689850	6.89354e+07	47883.6	1.54076		0	2020-08-10	0.208408		0.3	0.034316	0.0312837	0.188709	0.0320063	0.0319951	0.3	0.791592	1.12971	136000	0.0159819	0.64		0.997269	1.21965	0.00120632	0.00154507	0.00121201	00:00:00	132484	2022-07-15			3.30771e+08	2021-07-19	0	0.8
2020-08-11	4.64318e+06	0		0	0.4	290171	687669	6.96477e+07	47488	1.54076		0	2020-08-11	0.210558		0.3	0.0337518	0.0311843	0.188713	0.0322087	0.0317756	0.3	0.789442	1.12971	136300	0.015854	0.64		0.997284	1.21634	0.00120374	0.00154042	0.00120939	00:00:00	133274	2022-07-15			3.30777e+08	2021-07-19	0	0.8
2020-08-12	4.69024e+06	0		0	0.4	288113	684963	7.03536e+07	47059.7	1.54077		0	2020-08-12	0.212689		0.3	0.0331713	0.0310611	0.188715	0.0323872	0.0315318	0.3	0.787311	1.12971	136600	0.0157272	0.64		0.997301	1.21306	0.00120116	0.00153578	0.00120679	00:00:00	134051	2022-07-15			3.30782e+08	2021-07-19	0	0.8
2020-08-13	4.73684e+06	0		0	0.4	285849	681741	7.10526e+07	46599.9	1.54077		0	2020-08-13	0.214798		0.3	0.0325759	0.0309145	0.188718	0.0325414	0.0312643	0.3	0.785202	1.12971	136900	0.0156014	0.64		0.99732	1.20982	0.00119859	0.00153116	0.00120419	00:00:00	134815	2022-07-15			3.30788e+08	2021-07-19	0	0.8
2020-08-14	4.78295e+06	0		0	0.4	283387	678013	7.17443e+07	46110.1	1.54077		0	2020-08-14	0.216886		0.3	0.0319668	0.0307449	0.18872	0.0326706	0.030974	0.3	0.783114	1.12971	137200	0.0154765	0.64		0.997342	1.2066	0.00119603	0.00152657	0.0012016	00:00:00	135564	2022-07-15			3.30793e+08	2021-07-19	0	0.8
2020-08-15	4.82956e+06	0		0	0.4	281746	674802	7.24433e+07	46605.1	1.57503		0	2020-08-15	0.218995		0.4	0.0314588	0.0305988	0.206367	0.032799	0.0306802	0.4	0.781005	1.12971	137500	0.0153527	0.52		0.997306	1.23011	0.00119347	0.00152198	0.00119902	00:00:00	136315	2022-07-15			3.30798e+08	2021-07-19	0	0.8
2020-08-16	4.87602e+06	0		0	0.4	280325	671509	7.31403e+07	46461.9	1.5836		0	2020-08-16	0.221099		0.4	0.030982	0.030449	0.21066	0.0329118	0.0303725	0.4	0.778901	1.12971	137800	0.0152299	0.52		0.997307	1.23347	0.00119093	0.00151742	0.00119644	00:00:00	137058	2022-07-15			3.30804e+08	2021-07-19	0	0.8
2020-08-17	4.92243e+06	0		0	0.4	279251	668270	7.38365e+07	46414.7	1.59431		0	2020-08-17	0.2232		0.4	0.03055	0.0303016	0.215962	0.033012	0.0300541	0.4	0.7768	1.12971	138100	0.0151081	0.52		0.997303	1.23846	0.00118839	0.00151288	0.00119388	00:00:00	137794	2022-07-15			3.30809e+08	2021-07-19	0	0.8
2020-08-18	4.96893e+06	0		0	0.4	278691	665256	7.4534e+07	46499.3	1.60769		0	2020-08-18	0.225304		0.4	0.0301792	0.0301644	0.222489	0.0331032	0.0297285	0.4	0.774696	1.12971	138400	0.0149872	0.52		0.997291	1.24547	0.00118585	0.00150835	0.00119132	00:00:00	138526	2022-07-15			3.30815e+08	2021-07-19	0	0.8
2020-08-19	5.01545e+06	0		0	0.4	278606	662437	7.52317e+07	46515.3	1.61586		0	2020-08-19	0.22741		0.4	0.0298639	0.0300361	0.226417	0.0331845	0.0293959	0.4	0.77259	1.12971	138700	0.0148673	0.52		0.997282	1.2484	0.00118333	0.00150384	0.00118876	00:00:00	139252	2022-07-15			3.3082e+08	2021-07-19	0	0.8
2020-08-20	5.06205e+06	0		0	0.4	279103	659925	7.59308e+07	46606.3	1.62392		0	2020-08-20	0.229519		0.4	0.0296137	0.0299217	0.230259	0.0332583	0.0290587	0.4	0.770481	1.12971	139000	0.0147484	0.52		0.99727	1.2512	0.00118081	0.00149935	0.00118622	00:00:00	139974	2022-07-15			3.30826e+08	2021-07-19	0	0.8
2020-08-21	5.10883e+06	0		0	0.4	279272	657836	7.66324e+07	46774.1	1.63133		0	2020-08-21	0.231636		0.4	0.0293313	0.0298265	0.233752	0.0333271	0.0287196	0.4	0.768364	1.12971	139300	0.0146304	0.52		0.997252	1.25345	0.0011783	0.00149487	0.00118368	00:00:00	140693	2022-07-15			3.30831e+08	2021-07-19	0	0.8
2020-08-22	5.15567e+06	0		0	0.4	279653	656106	7.73351e+07	46842.8	1.63723		0	2020-08-22	0.233756		0.4	0.0290737	0.0297476	0.236517	0.0333893	0.028378	0.4	0.766244	1.12971	139600	0.0145133	0.52		0.997241	1.25452	0.00117579	0.00149041	0.00118115	00:00:00	141406	2022-07-15			3.30836e+08	2021-07-19	0	0.8
2020-08-23	5.2026e+06	0		0	0.4	280168	654791	7.8039e+07	46930	1.64258		0	2020-08-23	0.23588		0.4	0.0288323	0.0296875	0.239001	0.033446	0.0280354	0.4	0.76412	1.12971	139900	0.0143972	0.52		0.997228	1.25513	0.00117329	0.00148597	0.00117862	00:00:00	142116	2022-07-15			3.30842e+08	2021-07-19	0	0.8
2020-08-24	5.24962e+06	0		0	0.4	280688	653926	7.87443e+07	47019.3	1.64724		0	2020-08-24	0.238008		0.4	0.0285934	0.0296478	0.241156	0.0334981	0.027693	0.4	0.761992	1.12971	140200	0.0142821	0.52		0.997215	1.25518	0.0011708	0.00148155	0.00117611	00:00:00	142821	2022-07-15			3.30847e+08	2021-07-19	0	0.8
2020-08-25	5.29671e+06	0		0	0.4	281261	653527	7.94506e+07	47088.8	1.65122		0	2020-08-25	0.240139		0.4	0.0283619	0.0296292	0.242984	0.0335458	0.0273516	0.4	0.759861	1.12971	140500	0.0141678	0.52		0.997203	1.2547	0.00116832	0.00147714	0.0011736	00:00:00	143522	2022-07-15			3.30853e+08	2021-07-19	0	0.8
2020-08-26	5.34386e+06	0		0	0.4	281808	653620	8.01579e+07	47152.7	1.65472		0	2020-08-26	0.242273		0.4	0.0281296	0.0296329	0.244584	0.0335897	0.0270123	0.4	0.757727	1.12971	140800	0.0140545	0.52		0.997192	1.25382	0.00116584	0.00147275	0.00117109	00:00:00	144217	2022-07-15			3.30858e+08	2021-07-19	0	0.8
2020-08-27	5.39106e+06	0		0	0.4	282232	654218	8.08659e+07	47198	1.65775		0	2020-08-27	0.244408		0.4	0.0278872	0.0296596	0.245967	0.0336303	0.0266757	0.4	0.755592	1.12971	141100	0.013942	0.52		0.997181	1.25258	0.00116337	0.00146838	0.0011686	00:00:00	144908	2022-07-15			3.30864e+08	2021-07-19	0	0.8
2020-08-28	5.43827e+06	0		0	0.4	282599	655319	8.1574e+07	47210.5	1.66038		0	2020-08-28	0.246545		0.4	0.0276413	0.029709	0.24716	0.0336674	0.0263424	0.4	0.753455	1.12971	141400	0.0138305	0.52		0.997173	1.25102	0.00116091	0.00146403	0.00116611	00:00:00	145594	2022-07-15			3.30869e+08	2021-07-19	0	0.8
2020-08-29	5.48547e+06	0		0	0.4	282873	655917	8.22821e+07	47203.4	1.66267		0	2020-08-29	0.248681		0.4	0.0273886	0.0297356	0.248197	0.033677	0.0259945	0.4	0.751319	1.12971	141700	0.0137198	0.52		0.997165	1.2492	0.00115846	0.00145969	0.00116363	00:00:00	146274	2022-07-15			3.30875e+08	2021-07-19	0	0.8
2020-08-30	5.53264e+06	0		0	0.4	283025	656627	8.29897e+07	47171.4	1.66466		0	2020-08-30	0.250815		0.4	0.0271267	0.0297673	0.249095	0.0336735	0.025644	0.4	0.749185	1.12971	142000	0.0136101	0.52		0.997159	1.24714	0.00115601	0.00145537	0.00116116	00:00:00	146948	2022-07-15			3.3088e+08	2021-07-19	0	0.8
2020-08-31	5.57976e+06	0		0	0.4	283048	657323	8.36963e+07	47111.5	1.66638		0	2020-08-31	0.252947		0.4	0.0268551	0.0297984	0.249873	0.0336542	0.0252893	0.4	0.747053	1.12971	142300	0.0135012	0.52		0.997155	1.24488	0.00115357	0.00145106	0.00115869	00:00:00	147616	2022-07-15			3.30885e+08	2021-07-19	0	0.8
2020-09-01	5.63266e+06	0		0	0.4	288796	663726	8.44899e+07	52901.5	1.66788		0	2020-09-01	0.255341		0.4	0.0271242	0.0300881	0.33382	0.03391	0.0251289	0.4	0.744659	1.12971	142600	0.0133932	0.52		0.996795	1.24201	0.00115113	0.00144677	0.00115623	00:00:00	148360	2022-07-15			3.30891e+08	2021-07-19	0	0.9
2020-09-02	5.6865e+06	0		0	0.4	295444	671055	8.52975e+07	53845.1	1.66919		0	2020-09-02	0.257777		0.4	0.0274687	0.0304199	0.33434	0.0341986	0.0249948	0.4	0.742223	1.12971	142900	0.0132861	0.52		0.996728	1.23891	0.0011487	0.0014425	0.00115377	00:00:00	149111	2022-07-15			3.30896e+08	2021-07-19	0	0.9
2020-09-03	5.74144e+06	0		0	0.4	303174	679391	8.61217e+07	54941.4	1.67032		0	2020-09-03	0.260264		0.4	0.0279034	0.0307972	0.334792	0.0345262	0.0248911	0.4	0.739736	1.12971	143200	0.0131798	0.52		0.99665	1.2356	0.00114628	0.00143824	0.00115133	00:00:00	149871	2022-07-15			3.30902e+08	2021-07-19	0	0.9
2020-09-04	5.79767e+06	0		0	0.4	312194	688840	8.6965e+07	56223.3	1.67131		0	2020-09-04	0.262808		0.4	0.0284441	0.0312251	0.335184	0.0349008	0.0248227	0.4	0.737192	1.12971	143500	0.0130743	0.52		0.996561	1.23207	0.00114387	0.001434	0.00114889	00:00:00	150643	2022-07-15			3.30907e+08	2021-07-19	0	0.9
2020-09-05	5.85539e+06	0		0	0.4	322749	699724	8.78309e+07	57726.5	1.67216		0	2020-09-05	0.26542		0.4	0.0291097	0.0317179	0.335524	0.0353359	0.0247987	0.4	0.73458	1.12971	143800	0.0129697	0.52		0.996456	1.22834	0.00114146	0.00142978	0.00114646	00:00:00	151429	2022-07-15			3.30913e+08	2021-07-19	0	0.9
2020-09-06	5.91489e+06	0		0	0.4	335131	712287	8.87233e+07	59493.1	1.6729		0	2020-09-06	0.268113		0.4	0.0299222	0.0322868	0.335819	0.0358447	0.0248273	0.4	0.731887	1.12971	144100	0.012866	0.52		0.996335	1.22438	0.00113906	0.00142557	0.00114403	00:00:00	152233	2022-07-15			3.30918e+08	2021-07-19	0	0.9
2020-09-07	5.97646e+06	0		0	0.4	343802	726840	8.96469e+07	61572.8	1.67355		0	2020-09-07	0.270899		0.4	0.0303876	0.032946	0.336075	0.036443	0.0249184	0.4	0.729101	1.12971	144400	0.012763	0.52		0.996193	1.22019	0.00113667	0.00142138	0.00114161	00:00:00	153058	2022-07-15			3.30923e+08	2021-07-19	0	0.9
2020-09-08	6.03941e+06	0		0	0.4	352904	742698	9.05911e+07	62946.5	1.67411		0	2020-09-08	0.273748		0.4	0.0308783	0.0336642	0.336298	0.0370963	0.0250488	0.4	0.726252	1.12971	144700	0.0126609	0.52		0.996093	1.21583	0.00113428	0.0014172	0.0011392	00:00:00	153895	2022-07-15			3.30929e+08	2021-07-19	0	0.9
2020-09-09	6.10379e+06	0		0	0.4	362341	759924	9.15568e+07	64379.2	1.6746		0	2020-09-09	0.276661		0.4	0.0313854	0.0344445	0.336491	0.0378083	0.0252206	0.4	0.723339	1.12971	145000	0.0125597	0.52		0.995988	1.2113	0.0011319	0.00141304	0.00113679	00:00:00	154744	2022-07-15			3.30934e+08	2021-07-19	0	0.9
2020-09-10	6.16964e+06	0		0	0.4	371970	778579	9.25446e+07	65852.4	1.67502		0	2020-09-10	0.279642		0.4	0.0318957	0.0352894	0.336659	0.0385819	0.0254358	0.4	0.720358	1.12971	145300	0.0124592	0.52		0.99588	1.20662	0.00112952	0.0014089	0.0011344	00:00:00	155605	2022-07-15			3.3094e+08	2021-07-19	0	0.9
2020-09-11	6.23698e+06	0		0	0.4	381583	798707	9.35546e+07	67338.6	1.67539		0	2020-09-11	0.282689		0.4	0.0323913	0.0362012	0.336804	0.0394191	0.0256953	0.4	0.717311	1.12971	145600	0.0123595	0.52		0.995769	1.20178	0.00112716	0.00140477	0.001132	00:00:00	156479	2022-07-15			3.30945e+08	2021-07-19	0	0.9
2020-09-12	6.30578e+06	0		0	0.4	390889	820303	9.45866e+07	68799.6	1.67571		0	2020-09-12	0.285803		0.4	0.0328481	0.0371794	0.336931	0.0403196	0.0259991	0.4	0.714197	1.12971	145900	0.0122606	0.52		0.995659	1.19679	0.0011248	0.00140065	0.00112962	00:00:00	157365	2022-07-15			3.30951e+08	2021-07-19	0	0.9
2020-09-13	6.37596e+06	0		0	0.4	399500	843315	9.56394e+07	70183.3	1.67599		0	2020-09-13	0.288979		0.4	0.0332348	0.0382218	0.337041	0.0412807	0.0263454	0.4	0.711021	1.12971	146200	0.0121625	0.52		0.995553	1.19166	0.00112244	0.00139656	0.00112724	00:00:00	158261	2022-07-15			3.30956e+08	2021-07-19	0	0.9
2020-09-14	6.44738e+06	0		0	0.4	407974	867624	9.67107e+07	71420.5	1.67623		0	2020-09-14	0.292211		0.4	0.0335993	0.0393229	0.337136	0.0422967	0.0267306	0.4	0.707789	1.12971	146500	0.0120652	0.52		0.995454	1.18642	0.00112009	0.00139247	0.00112487	00:00:00	159166	2022-07-15			3.30962e+08	2021-07-19	0	0.9
2020-09-15	6.51999e+06	0		0	0.4	416207	887335	9.77999e+07	72613	1.67644		0	2020-09-15	0.295497		0.4	0.0339337	0.0402156	0.337219	0.0430718	0.0269536	0.4	0.704503	1.12971	146800	0.0119687	0.52		0.995357	1.18106	0.00111775	0.0013884	0.0011225	00:00:00	160079	2022-07-15			3.30967e+08	2021-07-19	0	0.9
2020-09-16	6.59374e+06	0		0	0.4	424098	907233	9.8906e+07	73742.6	1.67662		0	2020-09-16	0.298835		0.4	0.0342304	0.0411167	0.337291	0.043848	0.0271832	0.4	0.701165	1.12971	147100	0.011873	0.52		0.995263	1.17559	0.00111542	0.00138435	0.00112014	00:00:00	160998	2022-07-15			3.30972e+08	2021-07-19	0	0.9
2020-09-17	6.66853e+06	0		0	0.4	431551	927083	1.00028e+08	74791.7	1.67678		0	2020-09-17	0.302219		0.4	0.034483	0.0420156	0.337354	0.044614	0.0274129	0.4	0.697781	1.12971	147400	0.011778	0.52		0.995173	1.17002	0.00111309	0.00138032	0.00111779	00:00:00	161923	2022-07-15			3.30978e+08	2021-07-19	0	0.9
2020-09-18	6.74427e+06	0		0	0.4	438496	946605	1.01164e+08	75744.9	1.67692		0	2020-09-18	0.305647		0.4	0.0349668	0.0428997	0.337408	0.0453566	0.027635	0.4	0.694353	1.12971	147700	0.011778	0.52		0.995088	1.16437	0.00111077	0.00137629	0.00111545	00:00:00	162860	2022-07-15			3.30983e+08	2021-07-19	0	0.9
2020-09-19	6.82086e+06	0		0	0.4	444904	965470	1.02313e+08	76591.3	1.67704		0	2020-09-19	0.309113		0.4	0.0354059	0.0437539	0.337455	0.0460604	0.0278406	0.4	0.690887	1.12971	148000	0.011778	0.52		0.995008	1.15864	0.00110845	0.00137229	0.00111311	00:00:00	163807	2022-07-15			3.30989e+08	2021-07-19	0	0.9
2020-09-20	6.89819e+06	0		0	0.4	450811	983304	1.03473e+08	77327.5	1.67714		0	2020-09-20	0.312612		0.4	0.0358034	0.0445614	0.337497	0.046708	0.0280197	0.4	0.687388	1.12971	148300	0.011778	0.52		0.994935	1.15285	0.00110614	0.00136829	0.00111077	00:00:00	164763	2022-07-15			3.30994e+08	2021-07-19	0	0.9
2020-09-21	6.97615e+06	0		0	0.4	456160	999693	1.04642e+08	77961.5	1.67723		0	2020-09-21	0.31614		0.4	0.0361551	0.0453033	0.337532	0.0472798	0.0281612	0.4	0.68386	1.12971	148600	0.011778	0.52		0.994868	1.14699	0.00110384	0.00136432	0.00110845	00:00:00	165727	2022-07-15			3.31e+08	2021-07-19	0	0.9
2020-09-22	7.05464e+06	0		0	0.4	460902	1.01523e+06	1.0582e+08	78485.3	1.67731		0	2020-09-22	0.319692		0.4	0.0364574	0.0460068	0.337563	0.0478069	0.028287	0.4	0.680308	1.12971	148900	0.011778	0.52		0.994807	1.14109	0.00110154	0.00136035	0.00110613	00:00:00	166698	2022-07-15			3.31005e+08	2021-07-19	0	0.9
2020-09-23	7.13353e+06	0		0	0.4	465003	1.02974e+06	1.07003e+08	78892.7	1.67738		0	2020-09-23	0.323261		0.4	0.0367078	0.0466637	0.33759	0.0482818	0.0283935	0.4	0.676739	1.12971	149200	0.011778	0.52		0.994753	1.13515	0.00109925	0.00135641	0.00110381	00:00:00	167674	2022-07-15			3.31011e+08	2021-07-19	0	0.9
2020-09-24	7.21271e+06	0		0	0.4	468438	1.04307e+06	1.08191e+08	79179.7	1.67744		0	2020-09-24	0.326844		0.4	0.0369047	0.0472669	0.337613	0.0486978	0.0284777	0.4	0.673156	1.12971	149500	0.011778	0.52		0.994706	1.12918	0.00109697	0.00135247	0.00110151	00:00:00	168653	2022-07-15			3.31016e+08	2021-07-19	0	0.9
2020-09-25	7.29205e+06	0		0	0.4	471191	1.05508e+06	1.09381e+08	79344.8	1.67749		0	2020-09-25	0.330434		0.4	0.0370473	0.0478101	0.337634	0.0490497	0.0285373	0.4	0.669566	1.12971	149800	0.011778	0.52		0.994667	1.12319	0.00109469	0.00134855	0.00109921	00:00:00	169634	2022-07-15			3.31021e+08	2021-07-19	0	0.9
2020-09-26	7.37144e+06	0		0	0.4	473252	1.06567e+06	1.10572e+08	79387.6	1.67753		0	2020-09-26	0.334026		0.4	0.0371349	0.0482891	0.337651	0.0493342	0.0285711	0.4	0.665974	1.12971	150100	0.011778	0.52		0.994635	1.11719	0.00109242	0.00134465	0.00109691	00:00:00	170616	2022-07-15			3.31027e+08	2021-07-19	0	0.9
2020-09-27	7.45075e+06	0		0	0.4	474599	1.07479e+06	1.11761e+08	79308.8	1.67757		0	2020-09-27	0.337614		0.4	0.0371663	0.0487018	0.337667	0.0495503	0.0285796	0.4	0.662386	1.12971	150400	0.011778	0.52		0.994612	1.1112	0.00109015	0.00134076	0.00109462	00:00:00	171597	2022-07-15			3.31032e+08	2021-07-19	0	0.9
2020-09-28	7.52986e+06	0		0	0.4	475221	1.08248e+06	1.12948e+08	79107.6	1.6776		0	2020-09-28	0.341193		0.4	0.037141	0.0490494	0.33768	0.0497008	0.0285653	0.4	0.658807	1.12971	150700	0.011778	0.52		0.994597	1.10522	0.00108789	0.00133688	0.00109234	00:00:00	172575	2022-07-15			3.31038e+08	2021-07-19	0	0.9
2020-09-29	7.60864e+06	0		0	0.4	475113	1.08865e+06	1.1413e+08	78784.8	1.67763		0	2020-09-29	0.344758		0.4	0.0370588	0.0493282	0.337692	0.0497832	0.0285271	0.4	0.655242	1.12971	151000	0.011778	0.52		0.99459	1.09926	0.00108564	0.00133302	0.00109007	00:00:00	173549	2022-07-15			3.31043e+08	2021-07-19	0	0.9
2020-09-30	7.68699e+06	0		0	0.4	474276	1.09325e+06	1.15305e+08	78341.9	1.67766		0	2020-09-30	0.348302		0.4	0.0369201	0.0495358	0.337702	0.049796	0.0284647	0.4	0.651698	1.12971	151300	0.011778	0.52		0.994591	1.09333	0.00108339	0.00132917	0.0010878	00:00:00	174518	2022-07-15			3.31049e+08	2021-07-19	0	0.9
2020-10-01	7.77341e+06	0		0	0.4	481355	1.10488e+06	1.16601e+08	86424.3	1.67768		0	2020-10-01	0.352212		0.4	0.037397	0.050062	0.403939	0.0501215	0.0285956	0.4	0.647788	1.12971	151600	0.011778	0.52		0.994	1.08678	0.00108115	0.00132534	0.00108553	00:00:00	175587	2022-07-15			3.31054e+08	2021-07-19	0	1
2020-10-02	7.8606e+06	0		0	0.4	489156	1.11633e+06	1.17909e+08	87189	1.6777		0	2020-10-02	0.356156		0.4	0.0379281	0.0505797	0.403946	0.050439	0.0287389	0.4	0.643844	1.12971	151900	0.011778	0.52		0.993911	1.08018	0.00107892	0.00132152	0.00108328	00:00:00	176665	2022-07-15			3.31059e+08	2021-07-19	0	1
2020-10-03	7.94866e+06	0		0	0.4	497911	1.1278e+06	1.1923e+08	88063.5	1.67772		0	2020-10-03	0.360141		0.4	0.0385308	0.0510987	0.403952	0.0507591	0.0289011	0.4	0.639859	1.12971	152200	0.011778	0.52		0.993812	1.0735	0.00107669	0.00131772	0.00108103	00:00:00	177754	2022-07-15			3.31065e+08	2021-07-19	0	1
2020-10-04	8.03775e+06	0		0	0.4	507889	1.13956e+06	1.20566e+08	89085.6	1.67773		0	2020-10-04	0.364171		0.4	0.0392256	0.0516306	0.403957	0.0510939	0.02909	0.4	0.635829	1.12971	152500	0.011778	0.52		0.993701	1.06675	0.00107447	0.00131393	0.00107878	00:00:00	178856	2022-07-15			3.3107e+08	2021-07-19	0	1
2020-10-05	8.12805e+06	0		0	0.4	519404	1.15189e+06	1.21921e+08	90299.2	1.67774		0	2020-10-05	0.368256		0.4	0.0400362	0.0521887	0.403962	0.0514571	0.0293138	0.4	0.631744	1.12971	152800	0.011778	0.52		0.993575	1.0599	0.00107225	0.00131015	0.00107654	00:00:00	179973	2022-07-15			3.31076e+08	2021-07-19	0	1
2020-10-06	8.2198e+06	0		0	0.4	532815	1.16516e+06	1.23297e+08	91753.7	1.67776		0	2020-10-06	0.372407		0.4	0.0409895	0.052789	0.403966	0.0518647	0.0295826	0.4	0.627593	1.12971	153100	0.011778	0.52		0.993429	1.05295	0.00107004	0.00130638	0.00107431	00:00:00	181107	2022-07-15			3.31081e+08	2021-07-19	0	1
2020-10-07	8.31331e+06	0		0	0.4	539896	1.17978e+06	1.247e+08	93505	1.67777		0	2020-10-07	0.376637		0.4	0.041453	0.0534501	0.403969	0.0523356	0.029908	0.4	0.623363	1.12971	153400	0.011778	0.52		0.99326	1.04586	0.00106784	0.00130263	0.00107208	00:00:00	182264	2022-07-15			3.31087e+08	2021-07-19	0	1
2020-10-08	8.40741e+06	0		0	0.4	546816	1.19471e+06	1.26111e+08	94109.4	1.67777		0	2020-10-08	0.380895		0.4	0.0419024	0.0541256	0.403972	0.0528252	0.0302652	0.4	0.619105	1.12971	153700	0.011778	0.52		0.99317	1.03872	0.00106564	0.0012989	0.00106986	00:00:00	183428	2022-07-15			3.31092e+08	2021-07-19	0	1
2020-10-09	8.50208e+06	0		0	0.4	553418	1.21003e+06	1.27531e+08	94665.1	1.67778		0	2020-10-09	0.385177		0.4	0.0423256	0.0548188	0.403975	0.0533376	0.030657	0.4	0.614823	1.12971	154000	0.011778	0.52		0.993083	1.03154	0.00106344	0.00129518	0.00106765	00:00:00	184598	2022-07-15			3.31098e+08	2021-07-19	0	1
2020-10-10	8.59723e+06	0		0	0.4	559478	1.22578e+06	1.28958e+08	95145.6	1.67779		0	2020-10-10	0.389481		0.4	0.0427059	0.0555318	0.403977	0.0538754	0.0310857	0.4	0.610519	1.12971	154300	0.011778	0.52		0.993	1.02432	0.00106126	0.00129147	0.00106544	00:00:00	185775	2022-07-15			3.31103e+08	2021-07-19	0	1
2020-10-11	8.69274e+06	0		0	0.4	564693	1.24199e+06	1.30391e+08	95514.4	1.67779		0	2020-10-11	0.393802		0.4	0.0430204	0.0562651	0.403979	0.0544398	0.0315525	0.4	0.606198	1.12971	154600	0.011778	0.52		0.992923	1.01707	0.00105908	0.00128777	0.00106324	00:00:00	186956	2022-07-15			3.31108e+08	2021-07-19	0	1
2020-10-12	8.78846e+06	0		0	0.4	568662	1.2586e+06	1.31827e+08	95722.8	1.6778		0	2020-10-12	0.398132		0.4	0.0432388	0.0570168	0.40398	0.0550298	0.0320575	0.4	0.601868	1.12971	154900	0.011778	0.52		0.992857	1.00981	0.0010569	0.00128409	0.00106104	00:00:00	188140	2022-07-15			3.31114e+08	2021-07-19	0	1
2020-10-13	8.88417e+06	0		0	0.4	570865	1.27553e+06	1.33263e+08	95707.3	1.6778		0	2020-10-13	0.402461		0.4	0.0433224	0.0577825	0.403982	0.0556416	0.032599	0.4	0.597539	1.12971	155200	0.011778	0.52		0.992807	1.00255	0.00105473	0.00128042	0.00105885	00:00:00	189323	2022-07-15			3.31119e+08	2021-07-19	0	1
2020-10-14	8.97956e+06	0		0	0.4	572142	1.29257e+06	1.34693e+08	95387.1	1.6778		0	2020-10-14	0.406775		0.4	0.0433356	0.0585537	0.403983	0.0562676	0.0331728	0.4	0.593225	1.12971	155500	0.011778	0.52		0.99278	0.995315	0.00105257	0.00127676	0.00105667	00:00:00	190503	2022-07-15			3.31125e+08	2021-07-19	0	1
2020-10-15	9.07447e+06	0		0	0.4	572388	1.30106e+06	1.36117e+08	94910.5	1.67781		0	2020-10-15	0.411068		0.4	0.0432707	0.0589372	0.403984	0.0565242	0.0335611	0.4	0.588932	1.12971	155800	0.011778	0.52		0.992764	0.988115	0.00105041	0.00127312	0.00105449	00:00:00	191677	2022-07-15			3.3113e+08	2021-07-19	0	1
2020-10-16	9.16873e+06	0		0	0.4	571507	1.30813e+06	1.37531e+08	94264.3	1.67781		0	2020-10-16	0.415331		0.4	0.043121	0.0592567	0.403985	0.0567303	0.0339442	0.4	0.584669	1.12971	156100	0.011778	0.52		0.992761	0.980963	0.00104826	0.00126949	0.00105232	00:00:00	192843	2022-07-15			3.31136e+08	2021-07-19	0	1
2020-10-17	9.26217e+06	0		0	0.4	569430	1.31351e+06	1.38933e+08	93438	1.67781		0	2020-10-17	0.419557		0.4	0.042882	0.0594992	0.403986	0.0568736	0.0343146	0.4	0.580443	1.12971	156400	0.011778	0.52		0.992772	0.973875	0.00104611	0.00126587	0.00105015	00:00:00	193998	2022-07-15			3.31141e+08	2021-07-19	0	1
2020-10-18	9.3546e+06	0		0	0.4	566133	1.31685e+06	1.40319e+08	92425.7	1.67781		0	2020-10-18	0.423737		0.4	0.042552	0.0596495	0.403987	0.0569402	0.0346635	0.4	0.576263	1.12971	156700	0.011778	0.52		0.992799	0.966863	0.00104397	0.00126227	0.00104799	00:00:00	195141	2022-07-15			3.31147e+08	2021-07-19	0	1
2020-10-19	9.44582e+06	0		0	0.4	561655	1.31778e+06	1.41687e+08	91229	1.67782		0	2020-10-19	0.427862		0.4	0.0421348	0.0596906	0.403987	0.0569141	0.0349806	0.4	0.572138	1.12971	157000	0.011778	0.52		0.992841	0.959943	0.00104184	0.00125868	0.00104583	00:00:00	196269	2022-07-15			3.31152e+08	2021-07-19	0	1
2020-10-20	9.53568e+06	0		0	0.4	556127	1.31588e+06	1.43035e+08	89859.5	1.67782		0	2020-10-20	0.431925		0.4	0.0416405	0.0596038	0.403988	0.0567777	0.0352542	0.4	0.568075	1.12971	157300	0.011778	0.52		0.992898	0.953126	0.00103971	0.0012551	0.00104368	00:00:00	197381	2022-07-15			3.31157e+08	2021-07-19	0	1
2020-10-21	9.62403e+06	0		0	0.4	549560	1.31072e+06	1.4436e+08	88343.3	1.67782		0	2020-10-21	0.43592		0.4	0.0410705	0.0593691	0.403988	0.0565117	0.0354717	0.4	0.56408	1.12971	157600	0.011778	0.52		0.992969	0.946425	0.00103759	0.00125153	0.00104154	00:00:00	198473	2022-07-15			3.31163e+08	2021-07-19	0	1
2020-10-22	9.71071e+06	0		0	0.4	541982	1.3033e+06	1.45661e+08	86686.2	1.67782		0	2020-10-22	0.439839		0.4	0.0404272	0.0590319	0.403989	0.0561607	0.0356565	0.4	0.560161	1.12971	157900	0.011778	0.52		0.993052	0.93985	0.00103547	0.00124798	0.0010394	00:00:00	199545	2022-07-15			3.31168e+08	2021-07-19	0	1
2020-10-23	9.79561e+06	0		0	0.4	533441	1.29353e+06	1.46934e+08	84896.9	1.67782		0	2020-10-23	0.443677		0.4	0.0397146	0.0585885	0.403989	0.0557208	0.0358044	0.4	0.556323	1.12971	158200	0.011778	0.52		0.993148	0.933411	0.00103336	0.00124444	0.00103727	00:00:00	200595	2022-07-15			3.31174e+08	2021-07-19	0	1
2020-10-24	9.8786e+06	0		0	0.4	524001	1.28137e+06	1.48179e+08	82986.6	1.67782		0	2020-10-24	0.447428		0.4	0.0389381	0.0580368	0.403989	0.0551899	0.0359116	0.4	0.552572	1.12971	158500	0.011778	0.52		0.993257	0.927117	0.00103125	0.00124091	0.00103514	00:00:00	201621	2022-07-15			3.31179e+08	2021-07-19	0	1
2020-10-25	9.95957e+06	0		0	0.4	513741	1.26683e+06	1.49393e+08	80968.5	1.67782		0	2020-10-25	0.451088		0.4	0.0381035	0.057377	0.40399	0.0545677	0.0359756	0.4	0.548912	1.12971	158800	0.011778	0.52		0.993377	0.920977	0.00102915	0.0012374	0.00103302	00:00:00	202623	2022-07-15			3.31185e+08	2021-07-19	0	1
2020-10-26	1.00384e+07	0		0	0.4	502739	1.24996e+06	1.50576e+08	78857.3	1.67782		0	2020-10-26	0.454652		0.4	0.0372172	0.0566122	0.40399	0.0538566	0.0359951	0.4	0.545348	1.12971	159100	0.011778	0.52		0.993507	0.914997	0.00102705	0.0012339	0.0010309	00:00:00	203598	2022-07-15			3.3119e+08	2021-07-19	0	1
2020-10-27	1.01151e+07	0		0	0.4	491063	1.23092e+06	1.51726e+08	76667.5	1.67782		0	2020-10-27	0.458117		0.4	0.0362844	0.055749	0.40399	0.0530622	0.0359705	0.4	0.541883	1.12971	159400	0.011778	0.52		0.993647	0.909184	0.00102496	0.00123041	0.00102879	00:00:00	204546	2022-07-15			3.31196e+08	2021-07-19	0	1
2020-10-28	1.01895e+07	0		0	0.4	478788	1.20994e+06	1.52843e+08	74411.2	1.67783		0	2020-10-28	0.46148		0.4	0.0353109	0.054798	0.40399	0.0521941	0.0359046	0.4	0.53852	1.12971	159700	0.011778	0.52		0.993795	0.903543	0.00102288	0.00122693	0.00102669	00:00:00	205466	2022-07-15			3.31201e+08	2021-07-19	0	1
2020-10-29	1.02616e+07	0		0	0.4	465992	1.18713e+06	1.53924e+08	72100.9	1.67783		0	2020-10-29	0.464737		0.4	0.0343028	0.0537641	0.40399	0.0512559	0.0357968	0.4	0.535263	1.12971	160000	0.011778	0.52		0.99395	0.898077	0.0010208	0.00122347	0.00102459	00:00:00	206358	2022-07-15			3.31206e+08	2021-07-19	0	1
2020-10-30	1.03314e+07	0		0	0.4	452755	1.16262e+06	1.5497e+08	69749.5	1.67783		0	2020-10-30	0.467889		0.4	0.033266	0.052653	0.403991	0.0502521	0.0356467	0.4	0.532111	1.12971	160300	0.011778	0.52		0.994113	0.89279	0.00101873	0.00122001	0.0010225	00:00:00	207221	2022-07-15			3.31212e+08	2021-07-19	0	1
2020-10-31	1.03987e+07	0		0	0.4	439156	1.13655e+06	1.55981e+08	67369.2	1.67783		0	2020-10-31	0.470932		0.4	0.0322065	0.0514715	0.403991	0.0491881	0.0354549	0.4	0.529068	1.12971	160600	0.011778	0.52		0.994281	0.887684	0.00101666	0.00121657	0.00102041	00:00:00	208054	2022-07-15			3.31217e+08	2021-07-19	0	1
2020-11-01	1.04637e+07	0		0	0.4	425270	1.1091e+06	1.56955e+08	64971.9	1.67783		0	2020-11-01	0.473867		0.4	0.0311301	0.0502274	0.403991	0.0480704	0.0352223	0.4	0.526133	1.12971	160900	0.011778	0.52		0.994453	0.882761	0.0010146	0.00121314	0.00101833	00:00:00	208857	2022-07-15			3.31223e+08	2021-07-19	0	1
2020-11-02	1.05263e+07	0		0	0.4	411171	1.08044e+06	1.57894e+08	62568.6	1.67783		0	2020-11-02	0.476692		0.4	0.030042	0.0489287	0.403991	0.0469053	0.0349501	0.4	0.523308	1.12971	161200	0.011778	0.52		0.994629	0.87802	0.00101254	0.00120973	0.00101625	00:00:00	209631	2022-07-15			3.31228e+08	2021-07-19	0	1
2020-11-03	1.05864e+07	0		0	0.4	396930	1.05075e+06	1.58796e+08	60169.4	1.67783		0	2020-11-03	0.479409		0.4	0.0289476	0.0475833	0.403991	0.0456995	0.0346399	0.4	0.520591	1.12971	161500	0.011778	0.52		0.994808	0.873461	0.00101049	0.00120632	0.00101418	00:00:00	210375	2022-07-15			3.31234e+08	2021-07-19	0	1
2020-11-04	1.06442e+07	0		0	0.4	382612	1.02019e+06	1.59663e+08	57783.8	1.67783		0	2020-11-04	0.482018		0.4	0.0278517	0.0461987	0.403991	0.0444588	0.0342926	0.4	0.517982	1.12971	161800	0.011778	0.52		0.994989	0.869084	0.00100844	0.00120293	0.00101212	00:00:00	211090	2022-07-15			3.31239e+08	2021-07-19	0	1
2020-11-05	1.06996e+07	0		0	0.4	368283	988922	1.60495e+08	55420.4	1.67783		0	2020-11-05	0.48452		0.4	0.026759	0.0447821	0.403991	0.0431892	0.0339098	0.4	0.51548	1.12971	162100	0.011778	0.52		0.99517	0.864887	0.0010064	0.00119955	0.00101006	00:00:00	211775	2022-07-15			3.31245e+08	2021-07-19	0	1
2020-11-06	1.07527e+07	0		0	0.4	354001	957112	1.61291e+08	53087.2	1.67783		0	2020-11-06	0.486916		0.4	0.0256738	0.0433409	0.403991	0.0418966	0.033493	0.4	0.513084	1.12971	162400	0.011778	0.52		0.995352	0.860867	0.00100437	0.00119618	0.001008	00:00:00	212432	2022-07-15			3.3125e+08	2021-07-19	0	1
2020-11-07	1.08035e+07	0		0	0.4	339821	924917	1.62053e+08	50791.4	1.67783		0	2020-11-07	0.489208		0.4	0.0245999	0.0418823	0.403991	0.0405869	0.0330441	0.4	0.510792	1.12971	162700	0.011778	0.52		0.995533	0.857021	0.00100234	0.00119282	0.00100595	00:00:00	213060	2022-07-15			3.31255e+08	2021-07-19	0	1
2020-11-08	1.08521e+07	0		0	0.4	325791	892487	1.62781e+08	48539	1.67783		0	2020-11-08	0.491398		0.4	0.0235409	0.0404132	0.403991	0.0392658	0.032565	0.4	0.508602	1.12971	163000	0.011778	0.52		0.995713	0.853347	0.00100031	0.00118948	0.00100391	00:00:00	213660	2022-07-15			3.31261e+08	2021-07-19	0	1
2020-11-09	1.08984e+07	0		0	0.4	311957	859966	1.63476e+08	46335.5	1.67783		0	2020-11-09	0.493488		0.4	0.0224999	0.0389399	0.403991	0.0379386	0.0320576	0.4	0.506512	1.12971	163300	0.011778	0.52		0.995891	0.849841	0.000998294	0.00118614	0.00100187	00:00:00	214233	2022-07-15			3.31266e+08	2021-07-19	0	1
2020-11-10	1.09426e+07	0		0	0.4	298359	827484	1.64139e+08	44185.7	1.67783		0	2020-11-10	0.49548		0.4	0.0214796	0.0374685	0.403991	0.0366102	0.0315239	0.4	0.50452	1.12971	163600	0.011778	0.52		0.996066	0.846497	0.00099628	0.00118282	0.000999837	00:00:00	214780	2022-07-15			3.31272e+08	2021-07-19	0	1
2020-11-11	1.09847e+07	0		0	0.4	285032	795166	1.6477e+08	42093.4	1.67783		0	2020-11-11	0.497378		0.4	0.0204826	0.0360046	0.403991	0.0352855	0.0309661	0.4	0.502622	1.12971	163900	0.011778	0.52		0.996238	0.843313	0.000994271	0.00117951	0.000997809	00:00:00	215300	2022-07-15			3.31277e+08	2021-07-19	0	1
2020-11-12	1.10247e+07	0		0	0.4	272007	763127	1.65371e+08	40061.9	1.67783		0	2020-11-12	0.499184		0.4	0.0195109	0.0345533	0.403991	0.0339687	0.0303861	0.4	0.500816	1.12971	164200	0.011778	0.52		0.996407	0.840283	0.000992267	0.00117621	0.000995787	00:00:00	215796	2022-07-15			3.31283e+08	2021-07-19	0	1
2020-11-13	1.10628e+07	0		0	0.4	259309	731471	1.65942e+08	38093.8	1.67783		0	2020-11-13	0.5009		0.4	0.0185662	0.0331194	0.403991	0.0326641	0.0297862	0.4	0.4991	1.12971	164500	0.011778	0.52		0.996572	0.837403	0.000990269	0.00117292	0.00099377	00:00:00	216267	2022-07-15			3.31288e+08	2021-07-19	0	1
2020-11-14	1.1099e+07	0		0	0.4	246961	700293	1.66485e+08	36191.1	1.67783		0	2020-11-14	0.502531		0.4	0.0176499	0.0317072	0.403991	0.0313752	0.0291685	0.4	0.497469	1.12971	164800	0.011778	0.52		0.996733	0.834668	0.000988276	0.00116965	0.000991758	00:00:00	216714	2022-07-15			3.31294e+08	2021-07-19	0	1
2020-11-15	1.11334e+07	0		0	0.4	234981	669676	1.67001e+08	34355.1	1.67783		0	2020-11-15	0.504078		0.4	0.0167632	0.0303205	0.403991	0.0301054	0.0285353	0.4	0.495922	1.12971	165100	0.011778	0.52		0.99689	0.832072	0.000986287	0.00116638	0.000989751	00:00:00	217139	2022-07-15			3.31299e+08	2021-07-19	0	1
2020-11-16	1.1166e+07	0		0	0.4	223382	639694	1.67489e+08	32586.8	1.67783		0	2020-11-16	0.505545		0.4	0.0159068	0.0289625	0.403991	0.0288577	0.0278885	0.4	0.494455	1.12971	165400	0.011778	0.52		0.997042	0.82961	0.000984305	0.00116313	0.00098775	00:00:00	217542	2022-07-15			3.31304e+08	2021-07-19	0	1
2020-11-17	1.11968e+07	0		0	0.4	212175	610412	1.67953e+08	30886.7	1.67783		0	2020-11-17	0.506935		0.4	0.0150815	0.0276363	0.403991	0.0276348	0.0272304	0.4	0.493065	1.12971	165700	0.011778	0.52		0.997189	0.827278	0.000982327	0.00115989	0.000985753	00:00:00	217924	2022-07-15			3.3131e+08	2021-07-19	0	1
2020-11-18	1.12261e+07	0		0	0.4	201368	581883	1.68391e+08	29254.7	1.67783		0	2020-11-18	0.508251		0.4	0.0142874	0.0263442	0.403991	0.026439	0.026563	0.4	0.491749	1.12971	166000	0.011778	0.52		0.997331	0.82507	0.000980354	0.00115666	0.000983762	00:00:00	218286	2022-07-15			3.31315e+08	2021-07-19	0	1
2020-11-19	1.12538e+07	0		0	0.4	190965	554153	1.68807e+08	27690.5	1.67783		0	2020-11-19	0.509497		0.4	0.0135248	0.0250883	0.403991	0.0252722	0.0258883	0.4	0.490503	1.12971	166300	0.011778	0.52		0.997468	0.82298	0.000978387	0.00115344	0.000981776	00:00:00	218628	2022-07-15			3.31321e+08	2021-07-19	0	1
2020-11-20	1.128e+07	0		0	0.4	180967	527259	1.692e+08	26193.4	1.67783		0	2020-11-20	0.510674		0.4	0.0127937	0.0238704	0.403991	0.0241361	0.0252082	0.4	0.489326	1.12971	166600	0.011778	0.52		0.997599	0.821005	0.000976424	0.00115023	0.000979796	00:00:00	218952	2022-07-15			3.31326e+08	2021-07-19	0	1
2020-11-21	1.13047e+07	0		0	0.4	171375	501230	1.69571e+08	24762.5	1.67783		0	2020-11-21	0.511787		0.4	0.0120937	0.0226916	0.403991	0.0230321	0.0245246	0.4	0.488213	1.12971	166900	0.011778	0.52		0.997726	0.819138	0.000974467	0.00114703	0.00097782	00:00:00	219258	2022-07-15			3.31332e+08	2021-07-19	0	1
2020-11-22	1.13281e+07	0		0	0.4	162184	476087	1.69922e+08	23396.6	1.67783		0	2020-11-22	0.512837		0.4	0.0114247	0.021553	0.403991	0.0219613	0.0238394	0.4	0.487163	1.12971	167200	0.011778	0.52		0.997848	0.817375	0.000972514	0.00114385	0.00097585	00:00:00	219548	2022-07-15			3.31337e+08	2021-07-19	0	1
2020-11-23	1.13502e+07	0		0	0.4	153392	451846	1.70254e+08	22094.2	1.67783		0	2020-11-23	0.513829		0.4	0.0107859	0.0204552	0.403991	0.0209246	0.0231541	0.4	0.486171	1.12971	167500	0.011778	0.52		0.997964	0.815711	0.000970567	0.00114067	0.000973884	00:00:00	219821	2022-07-15			3.31343e+08	2021-07-19	0	1
2020-11-24	1.13711e+07	0		0	0.4	144991	428514	1.70566e+08	20853.9	1.67783		0	2020-11-24	0.514765		0.4	0.010177	0.0193987	0.403991	0.0199225	0.0224705	0.4	0.485235	1.12971	167800	0.011778	0.52		0.998076	0.814141	0.000968625	0.0011375	0.000971924	00:00:00	220079	2022-07-15			3.31348e+08	2021-07-19	0	1
2020-11-25	1.13908e+07	0		0	0.4	136974	406095	1.70861e+08	19673.9	1.67783		0	2020-11-25	0.515647		0.4	0.00959716	0.0183835	0.403991	0.0189553	0.0217901	0.4	0.484353	1.12971	168100	0.011778	0.52		0.998182	0.812661	0.000966687	0.00113435	0.000969969	00:00:00	220322	2022-07-15			3.31353e+08	2021-07-19	0	1
2020-11-26	1.14093e+07	0		0	0.4	129333	384585	1.7114e+08	18552.3	1.67783		0	2020-11-26	0.516478		0.4	0.00904564	0.0174095	0.403991	0.0180234	0.0211142	0.4	0.483522	1.12971	168400	0.011778	0.52		0.998284	0.811266	0.000964755	0.00113121	0.000968019	00:00:00	220552	2022-07-15			3.31359e+08	2021-07-19	0	1
2020-11-27	1.14268e+07	0		0	0.4	122058	363979	1.71402e+08	17487.3	1.67783		0	2020-11-27	0.517261		0.4	0.00852163	0.0164764	0.403991	0.0171266	0.0204443	0.4	0.482739	1.12971	168700	0.011778	0.52		0.99838	0.809952	0.000962828	0.00112808	0.000966074	00:00:00	220768	2022-07-15			3.31364e+08	2021-07-19	0	1
2020-11-28	1.14433e+07	0		0	0.4	115138	344265	1.71649e+08	16476.9	1.67783		0	2020-11-28	0.517999		0.4	0.00802425	0.0155837	0.403991	0.0162647	0.0197814	0.4	0.482001	1.12971	169000	0.011778	0.52		0.998473	0.808715	0.000960905	0.00112495	0.000964134	00:00:00	220972	2022-07-15			3.3137e+08	2021-07-19	0	1
2020-11-29	1.14588e+07	0		0	0.4	108563	325429	1.71882e+08	15519	1.67783		0	2020-11-29	0.518693		0.4	0.00755261	0.0147308	0.403991	0.0154376	0.0191268	0.4	0.481307	1.12971	169300	0.011778	0.52		0.99856	0.807551	0.000958988	0.00112184	0.000962199	00:00:00	221164	2022-07-15			3.31375e+08	2021-07-19	0	1
2020-11-30	1.14734e+07	0		0	0.4	102321	307453	1.72101e+08	14611.7	1.67783		0	2020-11-30	0.519346		0.4	0.00710576	0.0139169	0.403991	0.0146446	0.0184815	0.4	0.480654	1.12971	169600	0.011778	0.52		0.998644	0.806455	0.000957075	0.00111874	0.000960268	00:00:00	221344	2022-07-15			3.31381e+08	2021-07-19	0	1
2020-12-01	1.14877e+07	0		0	0.4	96961.7	290881	1.72316e+08	14314.5	1.74634		0	2020-12-01	0.519985		0.6	0.00672168	0.0131666	0.427375	0.0139227	0.0178814	0.6	0.480015	1.12971	169900	0.011778	0.28		0.99867	0.838271	0.000955167	0.00111565	0.000958343	00:00:00	221521	2022-07-15			3.31386e+08	2021-07-19	0	1
2020-12-02	1.15014e+07	0		0	0.4	92089	275306	1.72521e+08	13679.6	1.76347		0	2020-12-02	0.520596		0.6	0.00637264	0.0124614	0.432937	0.0132459	0.0173047	0.6	0.479404	1.12971	170200	0.011778	0.28		0.998728	0.845416	0.000953264	0.00111257	0.000956423	00:00:00	221691	2022-07-15			3.31392e+08	2021-07-19	0	1
2020-12-03	1.15145e+07	0		0	0.4	87734.8	260749	1.72718e+08	13133.1	1.78488		0	2020-12-03	0.521182		0.6	0.00606064	0.0118023	0.439739	0.0126167	0.0167554	0.6	0.478818	1.12971	170500	0.011778	0.28		0.998778	0.854634	0.000951366	0.0011095	0.000954508	00:00:00	221853	2022-07-15			3.31397e+08	2021-07-19	0	1
2020-12-04	1.15272e+07	0		0	0.4	83942.2	247240	1.72908e+08	12684.3	1.81165		0	2020-12-04	0.521747		0.6	0.00578847	0.0111906	0.448016	0.0120383	0.0162384	0.6	0.478253	1.12971	170800	0.011778	0.28		0.998819	0.866425	0.000949473	0.00110645	0.000952597	00:00:00	222010	2022-07-15			3.31403e+08	2021-07-19	0	1
2020-12-05	1.15395e+07	0		0	0.4	80654	234708	1.73092e+08	12230.8	1.82797		0	2020-12-05	0.522292		0.6	0.00555197	0.0106232	0.452945	0.0115071	0.0157519	0.6	0.477708	1.12971	171100	0.011778	0.28		0.99886	0.873236	0.000947585	0.0011034	0.000950692	00:00:00	222161	2022-07-15			3.31408e+08	2021-07-19	0	1
2020-12-06	1.15513e+07	0		0	0.4	77884.1	223153	1.73269e+08	11841.9	1.8441		0	2020-12-06	0.52282		0.6	0.00535192	0.0101001	0.457729	0.0110242	0.0152988	0.6	0.47718	1.12971	171400	0.011778	0.28		0.998896	0.879967	0.000945701	0.00110036	0.000948791	00:00:00	222307	2022-07-15			3.31413e+08	2021-07-19	0	1
2020-12-07	1.15628e+07	0		0	0.4	75083.9	212573	1.73442e+08	11514.3	1.8589		0	2020-12-07	0.523332		0.6	0.00515048	0.00962106	0.462047	0.0105909	0.0148816	0.6	0.476668	1.12971	171700	0.011778	0.28		0.998926	0.886078	0.000943823	0.00109733	0.000946896	00:00:00	222450	2022-07-15			3.31419e+08	2021-07-19	0	1
2020-12-08	1.1574e+07	0		0	0.4	72563.2	202878	1.7361e+08	11158.8	1.87071		0	2020-12-08	0.523829		0.6	0.00496888	0.00918211	0.465444	0.0102022	0.0144971	0.6	0.476171	1.12971	172000	0.011778	0.28		0.998959	0.89078	0.000941949	0.00109431	0.000945005	00:00:00	222588	2022-07-15			3.31424e+08	2021-07-19	0	1
2020-12-09	1.15848e+07	0		0	0.4	70264.6	194039	1.73772e+08	10834.5	1.8814		0	2020-12-09	0.52431		0.6	0.00480311	0.00878191	0.46848	0.00985731	0.014146	0.6	0.47569	1.12971	172300	0.011778	0.28		0.998988	0.894962	0.000940079	0.00109131	0.000943119	00:00:00	222722	2022-07-15			3.3143e+08	2021-07-19	0	1
2020-12-10	1.15953e+07	0		0	0.4	68113	186019	1.7393e+08	10532.6	1.89072		0	2020-12-10	0.524778		0.6	0.00464793	0.00841881	0.471102	0.00955497	0.0138282	0.6	0.475222	1.12971	172600	0.011778	0.28		0.999016	0.898513	0.000938215	0.00108831	0.000941237	00:00:00	222852	2022-07-15			3.31435e+08	2021-07-19	0	1
2020-12-11	1.16056e+07	0		0	0.4	66125.1	178775	1.74084e+08	10243	1.89868		0	2020-12-11	0.525233		0.6	0.00450446	0.00809082	0.473318	0.00929328	0.0135431	0.6	0.474767	1.12971	172900	0.011778	0.28		0.999043	0.90143	0.000936355	0.00108532	0.000939361	00:00:00	222979	2022-07-15			3.31441e+08	2021-07-19	0	1
2020-12-12	1.16155e+07	0		0	0.4	64254.3	172269	1.74233e+08	9971.11	1.90567		0	2020-12-12	0.525676		0.6	0.00436944	0.00779626	0.475251	0.00907084	0.0132904	0.6	0.474324	1.12971	173200	0.011778	0.28		0.999068	0.903906	0.0009345	0.00108235	0.000937489	00:00:00	223102	2022-07-15			3.31446e+08	2021-07-19	0	1
2020-12-13	1.16253e+07	0		0	0.4	62450.9	166461	1.74379e+08	9710.81	1.91174		0	2020-12-13	0.526107		0.6	0.00423946	0.00753327	0.476916	0.00888589	0.0130693	0.6	0.473893	1.12971	173500	0.011778	0.28		0.999092	0.905961	0.00093265	0.00107938	0.000935622	00:00:00	223222	2022-07-15			3.31452e+08	2021-07-19	0	1
2020-12-14	1.16347e+07	0		0	0.4	60747.6	161305	1.74521e+08	9455.59	1.91699		0	2020-12-14	0.526526		0.6	0.00411671	0.00729981	0.47835	0.00873627	0.0128787	0.6	0.473474	1.12971	173800	0.011778	0.28		0.999115	0.907647	0.000930804	0.00107642	0.00093376	00:00:00	223339	2022-07-15			3.31457e+08	2021-07-19	0	1
2020-12-15	1.16439e+07	0		0	0.4	59124.7	156202	1.74659e+08	9211.52	1.92157		0	2020-12-15	0.526934		0.6	0.00399982	0.00706876	0.479593	0.00858305	0.0126827	0.6	0.473066	1.12971	174100	0.011778	0.28		0.999138	0.909031	0.000928963	0.00107348	0.000931902	00:00:00	223453	2022-07-15			3.31462e+08	2021-07-19	0	1
2020-12-16	1.16529e+07	0		0	0.4	57568.2	151499	1.74794e+08	8976.22	1.92555		0	2020-12-16	0.527332		0.6	0.00388783	0.0068558	0.480667	0.00844971	0.0125031	0.6	0.472668	1.12971	174400	0.011778	0.28		0.99916	0.910146	0.000927127	0.00107054	0.00093005	00:00:00	223564	2022-07-15			3.31468e+08	2021-07-19	0	1
2020-12-17	1.16617e+07	0		0	0.4	56073.5	147114	1.74925e+08	8748.24	1.929		0	2020-12-17	0.527719		0.6	0.00378038	0.00665726	0.481597	0.00833136	0.0123356	0.6	0.472281	1.12971	174700	0.011778	0.28		0.999181	0.91103	0.000925295	0.00106761	0.000928201	00:00:00	223672	2022-07-15			3.31473e+08	2021-07-19	0	1
2020-12-18	1.16702e+07	0		0	0.4	54629.7	142957	1.75053e+08	8527.36	1.932		0	2020-12-18	0.528096		0.6	0.00367673	0.00646905	0.482402	0.00822235	0.0121748	0.6	0.471904	1.12971	175000	0.011778	0.28		0.999201	0.911719	0.000923468	0.00106469	0.000926358	00:00:00	223778	2022-07-15			3.31479e+08	2021-07-19	0	1
2020-12-19	1.16785e+07	0		0	0.4	53231.3	139038	1.75177e+08	8312.36	1.93461		0	2020-12-19	0.528464		0.6	0.00357648	0.00629163	0.4831	0.00812373	0.0120219	0.6	0.471536	1.12971	175300	0.011778	0.28		0.999221	0.912239	0.000921645	0.00106179	0.000924519	00:00:00	223881	2022-07-15			3.31484e+08	2021-07-19	0	1
2020-12-20	1.16866e+07	0		0	0.4	51878.4	135299	1.75299e+08	8102.75	1.93687		0	2020-12-20	0.528822		0.6	0.00347963	0.00612233	0.483704	0.00803178	0.0118735	0.6	0.471178	1.12971	175600	0.011778	0.28		0.999241	0.912613	0.000919827	0.00105889	0.000922685	00:00:00	223981	2022-07-15			3.3149e+08	2021-07-19	0	1
2020-12-21	1.16945e+07	0		0	0.4	50565.8	131684	1.75417e+08	7898.85	1.93884		0	2020-12-21	0.52917		0.6	0.0033858	0.00595863	0.484228	0.00794289	0.0117263	0.6	0.47083	1.12971	175900	0.011778	0.28		0.99926	0.912865	0.000918014	0.001056	0.000920856	00:00:00	224078	2022-07-15			3.31495e+08	2021-07-19	0	1
2020-12-22	1.17022e+07	0		0	0.4	49289.6	128225	1.75533e+08	7700.07	1.94055		0	2020-12-22	0.52951		0.6	0.00329474	0.00580203	0.484683	0.00785955	0.0115826	0.6	0.47049	1.12971	176200	0.011778	0.28		0.999278	0.913011	0.000916205	0.00105312	0.000919031	00:00:00	224174	2022-07-15			3.31501e+08	2021-07-19	0	1
2020-12-23	1.17097e+07	0		0	0.4	48047.5	124897	1.75645e+08	7506.07	1.94204		0	2020-12-23	0.529841		0.6	0.00320624	0.00565132	0.485077	0.00778011	0.0114409	0.6	0.470159	1.12971	176500	0.011778	0.28		0.999297	0.913067	0.000914401	0.00105025	0.000917211	00:00:00	224266	2022-07-15			3.31506e+08	2021-07-19	0	1
2020-12-24	1.1717e+07	0		0	0.4	46836.7	121681	1.75755e+08	7316.62	1.94333		0	2020-12-24	0.530163		0.6	0.00312015	0.00550572	0.485419	0.00770346	0.0113004	0.6	0.469837	1.12971	176800	0.011778	0.28		0.999314	0.913048	0.000912601	0.00104739	0.000915395	00:00:00	224357	2022-07-15			3.31511e+08	2021-07-19	0	1
2020-12-25	1.17241e+07	0		0	0.4	45655.8	118569	1.75862e+08	7131.47	1.94445		0	2020-12-25	0.530477		0.6	0.00303633	0.00536484	0.485716	0.00762919	0.0111606	0.6	0.469523	1.12971	177100	0.011778	0.28		0.999332	0.912964	0.000910806	0.00104454	0.000913584	00:00:00	224445	2022-07-15			3.31517e+08	2021-07-19	0	1
2020-12-26	1.17311e+07	0		0	0.4	44503.6	115548	1.75966e+08	6950.51	1.94543		0	2020-12-26	0.530783		0.6	0.00295469	0.00522808	0.485974	0.00755641	0.0110208	0.6	0.469217	1.12971	177400	0.011778	0.28		0.999349	0.912827	0.000909015	0.0010417	0.000911777	00:00:00	224531	2022-07-15			3.31522e+08	2021-07-19	0	1
2020-12-27	1.17379e+07	0		0	0.4	43378.4	112611	1.76068e+08	6773.63	1.94627		0	2020-12-27	0.531081		0.6	0.00287513	0.0050951	0.486198	0.00748471	0.0108807	0.6	0.468919	1.12971	177700	0.011778	0.28		0.999365	0.912645	0.000907229	0.00103887	0.000909975	00:00:00	224615	2022-07-15			3.31528e+08	2021-07-19	0	1
2020-12-28	1.17445e+07	0		0	0.4	42279	109756	1.76167e+08	6600.67	1.94701		0	2020-12-28	0.531371		0.6	0.00279753	0.00496585	0.486392	0.00741408	0.0107404	0.6	0.468629	1.12971	178000	0.011778	0.28		0.999382	0.912426	0.000905447	0.00103605	0.000908178	00:00:00	224696	2022-07-15			3.31533e+08	2021-07-19	0	1
2020-12-29	1.17509e+07	0		0	0.4	41204.4	106976	1.76264e+08	6431.51	1.94765		0	2020-12-29	0.531653		0.6	0.00272184	0.00483999	0.48656	0.00734407	0.0105996	0.6	0.468347	1.12971	178300	0.011778	0.28		0.999398	0.912176	0.000903669	0.00103324	0.000906384	00:00:00	224776	2022-07-15			3.31539e+08	2021-07-19	0	1
2020-12-30	1.17572e+07	0		0	0.4	40153.9	104266	1.76358e+08	6266.06	1.9482		0	2020-12-30	0.531928		0.6	0.00264799	0.0047173	0.486707	0.00727439	0.010458	0.6	0.468072	1.12971	178600	0.011778	0.28		0.999413	0.911901	0.000901896	0.00103043	0.000904596	00:00:00	224854	2022-07-15			3.31544e+08	2021-07-19	0	1
2020-12-31	1.17633e+07	0		0	0.4	39126.6	101622	1.76449e+08	6104.23	1.94869		0	2020-12-31	0.532195		0.6	0.00257592	0.0045976	0.486834	0.00720484	0.0103157	0.6	0.467805	1.12971	178900	0.011778	0.28		0.999429	0.911605	0.000900128	0.00102764	0.000902812	00:00:00	224929	2022-07-15			3.3155e+08	2021-07-19	0	1
2021-01-01	1.17692e+07	0		0	0.4	38122.1	99040.8	1.76538e+08	5945.95	1.94911		0	2021-01-01	0.532455		0.6	0.00250559	0.00448074	0.486944	0.00713523	0.0101725	0.6	0.467545	1.12971	179200	0.011778	0.28		0.999444	0.911294	0.000898364	0.00102485	0.000901032	00:00:00	225003	2022-07-15			3.31555e+08	2021-07-19	0	1
2021-01-02	1.1775e+07	0		0	0.4	37139.6	96519.5	1.76625e+08	5791.15	1.94947		0	2021-01-02	0.532709		0.6	0.00243693	0.0043666	0.48704	0.00706544	0.0100284	0.6	0.467291	1.12971	179500	0.011778	0.28		0.999458	0.910971	0.000896604	0.00102208	0.000899257	00:00:00	225074	2022-07-15			3.31561e+08	2021-07-19	0	1
2021-01-03	1.17806e+07	0		0	0.4	36178.7	94056.6	1.7671e+08	5639.76	1.94979		0	2021-01-03	0.532955		0.6	0.00236992	0.00425511	0.487124	0.0069954	0.00988353	0.6	0.467045	1.12971	179800	0.011778	0.28		0.999473	0.910639	0.000894848	0.00101931	0.000897486	00:00:00	225144	2022-07-15			3.31566e+08	2021-07-19	0	1
2021-01-04	1.17861e+07	0		0	0.4	35238.9	91649.4	1.76792e+08	5491.72	1.95006		0	2021-01-04	0.533195		0.6	0.00230451	0.00414614	0.487196	0.006925	0.0097378	0.6	0.466805	1.12971	180100	0.011778	0.28		0.999487	0.9103	0.000893097	0.00101655	0.00089572	00:00:00	225212	2022-07-15			3.31571e+08	2021-07-19	0	1
2021-01-05	1.17915e+07	0		0	0.4	34319.8	89296.3	1.76872e+08	5346.98	1.9503		0	2021-01-05	0.533428		0.6	0.00224068	0.00403962	0.487259	0.00685417	0.00959129	0.6	0.466572	1.12971	180400	0.011778	0.28		0.999501	0.909957	0.00089135	0.00101381	0.000893958	00:00:00	225278	2022-07-15			3.31577e+08	2021-07-19	0	1
2021-01-06	1.17967e+07	0		0	0.4	33421	86995.8	1.7695e+08	5205.48	1.95051		0	2021-01-06	0.533655		0.6	0.00217838	0.00393548	0.487313	0.00678287	0.00944407	0.6	0.466345	1.12971	180700	0.011778	0.28		0.999514	0.909611	0.000889608	0.00101107	0.0008922	00:00:00	225342	2022-07-15			3.31582e+08	2021-07-19	0	1
2021-01-07	1.18018e+07	0		0	0.4	32542.3	84746.3	1.77026e+08	5067.16	1.95069		0	2021-01-07	0.533875		0.6	0.00211758	0.00383366	0.487361	0.00671106	0.00929621	0.6	0.466125	1.12971	181000	0.011778	0.28		0.999527	0.909265	0.00088787	0.00100834	0.000890447	00:00:00	225405	2022-07-15			3.31588e+08	2021-07-19	0	1
2021-01-08	1.18067e+07	0		0	0.4	31683.1	82546.8	1.771e+08	4931.99	1.95085		0	2021-01-08	0.534089		0.6	0.00205826	0.0037341	0.487402	0.00663874	0.0091478	0.6	0.465911	1.12971	181300	0.011778	0.28		0.99954	0.90892	0.000886136	0.00100561	0.000888698	00:00:00	225466	2022-07-15			3.31593e+08	2021-07-19	0	1
2021-01-09	1.18115e+07	0		0	0.4	30843.2	80396.2	1.77172e+08	4799.9	1.95098		0	2021-01-09	0.534298		0.6	0.00200039	0.00363675	0.487438	0.0065659	0.00899895	0.6	0.465702	1.12971	181600	0.011778	0.28		0.999553	0.908577	0.000884406	0.0010029	0.000886954	00:00:00	225525	2022-07-15			3.31599e+08	2021-07-19	0	1
2021-01-10	1.18162e+07	0		0	0.4	30022.4	78293.4	1.77242e+08	4670.86	1.9511		0	2021-01-10	0.5345		0.6	0.00194394	0.00354158	0.487469	0.00649253	0.00884975	0.6	0.4655	1.12971	181900	0.011778	0.28		0.999565	0.908237	0.000882681	0.0010002	0.000885214	00:00:00	225583	2022-07-15			3.31604e+08	2021-07-19	0	1
2021-01-11	1.18207e+07	0		0	0.4	29220.2	76237.6	1.77311e+08	4544.81	1.9512		0	2021-01-11	0.534697		0.6	0.00188889	0.00344852	0.487496	0.00641865	0.00870031	0.6	0.465303	1.12971	182200	0.011778	0.28		0.999577	0.907901	0.00088096	0.000997503	0.000883478	00:00:00	225639	2022-07-15			3.3161e+08	2021-07-19	0	1
2021-01-12	1.18251e+07	0		0	0.4	28436.4	74227.8	1.77377e+08	4421.71	1.95129		0	2021-01-12	0.534888		0.6	0.0018352	0.00335756	0.487519	0.00634428	0.00855074	0.6	0.465112	1.12971	182500	0.011778	0.28		0.999589	0.90757	0.000879243	0.000994817	0.000881746	00:00:00	225694	2022-07-15			3.31615e+08	2021-07-19	0	1
2021-01-13	1.18294e+07	0		0	0.4	27670.8	72263.2	1.77441e+08	4301.51	1.95137		0	2021-01-13	0.535074		0.6	0.00178286	0.00326864	0.48754	0.00626944	0.00840115	0.6	0.464926	1.12971	182800	0.011778	0.28		0.999601	0.907243	0.000877531	0.000992139	0.000880019	00:00:00	225747	2022-07-15			3.31621e+08	2021-07-19	0	1
2021-01-14	1.18336e+07	0		0	0.4	26923	70343.2	1.77504e+08	4184.17	1.95144		0	2021-01-14	0.535254		0.6	0.00173183	0.00318174	0.487558	0.00619415	0.00825166	0.6	0.464746	1.12971	183100	0.011778	0.28		0.999612	0.906922	0.000875822	0.00098947	0.000878296	00:00:00	225799	2022-07-15			3.31626e+08	2021-07-19	0	1
2021-01-15	1.18377e+07	0		0	0.4	26192.7	68466.8	1.77565e+08	4069.63	1.9515		0	2021-01-15	0.53543		0.6	0.0016821	0.00309682	0.487573	0.00611845	0.00810238	0.6	0.46457	1.12971	183400	0.011778	0.28		0.999623	0.906608	0.000874118	0.00098681	0.000876577	00:00:00	225849	2022-07-15			3.31631e+08	2021-07-19	0	1
2021-01-16	1.18416e+07	0		0	0.4	25479.7	66633.5	1.77625e+08	3957.85	1.95155		0	2021-01-16	0.5356		0.6	0.00163364	0.00301385	0.487586	0.00604238	0.00795343	0.6	0.4644	1.12971	183700	0.011778	0.28		0.999634	0.906299	0.000872418	0.000984159	0.000874863	00:00:00	225898	2022-07-15			3.31637e+08	2021-07-19	0	1
2021-01-17	1.18455e+07	0		0	0.4	24783.7	64842.6	1.77682e+08	3848.79	1.95159		0	2021-01-17	0.535765		0.6	0.00158642	0.00293279	0.487598	0.00596597	0.00780491	0.6	0.464235	1.12971	184000	0.011778	0.28		0.999644	0.905997	0.000870722	0.000981516	0.000873152	00:00:00	225946	2022-07-15			3.31642e+08	2021-07-19	0	1
2021-01-18	1.18492e+07	0		0	0.4	24104.3	63093.2	1.77739e+08	3742.4	1.95163		0	2021-01-18	0.535926		0.6	0.00154043	0.00285363	0.487608	0.00588926	0.00765694	0.6	0.464074	1.12971	184300	0.011778	0.28		0.999654	0.905702	0.00086903	0.000978882	0.000871446	00:00:00	225992	2022-07-15			3.31648e+08	2021-07-19	0	1
2021-01-19	1.18529e+07	0		0	0.4	23441.5	61384.9	1.77793e+08	3638.62	1.95166		0	2021-01-19	0.536081		0.6	0.00149563	0.00277631	0.487617	0.0058123	0.00750962	0.6	0.463919	1.12971	184600	0.011778	0.28		0.999664	0.905413	0.000867343	0.000976256	0.000869744	00:00:00	226037	2022-07-15			3.31653e+08	2021-07-19	0	1
2021-01-20	1.18564e+07	0		0	0.4	22794.7	59716.8	1.77846e+08	3537.42	1.95169		0	2021-01-20	0.536233		0.6	0.00145201	0.00270083	0.487624	0.00573511	0.00736305	0.6	0.463767	1.12971	184900	0.011778	0.28		0.999674	0.905132	0.00086566	0.000973639	0.000868047	00:00:00	226081	2022-07-15			3.31659e+08	2021-07-19	0	1
2021-01-21	1.18598e+07	0		0	0.4	22163.8	58088.4	1.77898e+08	3438.75	1.95172		0	2021-01-21	0.536379		0.6	0.00140953	0.00262713	0.487631	0.00565776	0.00721733	0.6	0.463621	1.12971	185200	0.011778	0.28		0.999684	0.904857	0.00086398	0.00097103	0.000866353	00:00:00	226123	2022-07-15			3.31664e+08	2021-07-19	0	1
2021-01-22	1.18632e+07	0		0	0.4	21548.5	56499	1.77948e+08	3342.55	1.95174		0	2021-01-22	0.536522		0.6	0.00136818	0.00255521	0.487637	0.00558028	0.00707256	0.6	0.463478	1.12971	185500	0.011778	0.28		0.999693	0.90459	0.000862305	0.00096843	0.000864664	00:00:00	226165	2022-07-15			3.3167e+08	2021-07-19	0	1
2021-01-23	1.18664e+07	0		0	0.4	20948.5	54947.9	1.77997e+08	3248.79	1.95176		0	2021-01-23	0.53666		0.6	0.00132794	0.00248502	0.487642	0.00550271	0.00692884	0.6	0.46334	1.12971	185800	0.011778	0.28		0.999702	0.904329	0.000860634	0.000965838	0.000862978	00:00:00	226205	2022-07-15			3.31675e+08	2021-07-19	0	1
2021-01-24	1.18696e+07	0		0	0.4	20363.6	53434.4	1.78044e+08	3157.42	1.95178		0	2021-01-24	0.536794		0.6	0.00128878	0.00241653	0.487646	0.0054251	0.00678624	0.6	0.463206	1.12971	186100	0.011778	0.28		0.999711	0.904075	0.000858967	0.000963254	0.000861297	00:00:00	226244	2022-07-15			3.3168e+08	2021-07-19	0	1
2021-01-25	1.18727e+07	0		0	0.4	19793.3	51958	1.7809e+08	3068.39	1.95179		0	2021-01-25	0.536924		0.6	0.00125067	0.00234972	0.48765	0.0053475	0.00664486	0.6	0.463076	1.12971	186400	0.011778	0.28		0.999719	0.903828	0.000857304	0.000960679	0.00085962	00:00:00	226282	2022-07-15			3.31686e+08	2021-07-19	0	1
2021-01-26	1.18756e+07	0		0	0.4	19237.5	50517.9	1.78135e+08	2981.65	1.9518		0	2021-01-26	0.53705		0.6	0.0012136	0.00228456	0.487653	0.00526994	0.00650477	0.6	0.46295	1.12971	186700	0.011778	0.28		0.999728	0.903588	0.000855645	0.000958112	0.000857947	00:00:00	226319	2022-07-15			3.31691e+08	2021-07-19	0	1
2021-01-27	1.18785e+07	0		0	0.4	18696	49113.6	1.78178e+08	2897.15	1.95181		0	2021-01-27	0.537172		0.6	0.00117754	0.00222101	0.487656	0.00519247	0.00636605	0.6	0.462828	1.12971	187000	0.011778	0.28		0.999736	0.903354	0.00085399	0.000955553	0.000856279	00:00:00	226355	2022-07-15			3.31697e+08	2021-07-19	0	1
2021-01-28	1.18814e+07	0		0	0.4	18168.3	47744.3	1.7822e+08	2814.86	1.95182		0	2021-01-28	0.53729		0.6	0.00114247	0.00215906	0.487658	0.00511513	0.00622876	0.6	0.46271	1.12971	187300	0.011778	0.28		0.999744	0.903128	0.000852339	0.000953002	0.000854614	00:00:00	226389	2022-07-15			3.31702e+08	2021-07-19	0	1
2021-01-29	1.18841e+07	0		0	0.4	17654.2	46409.4	1.78261e+08	2734.72	1.95183		0	2021-01-29	0.537405		0.6	0.00110837	0.00209866	0.487661	0.00503796	0.00609297	0.6	0.462595	1.12971	187600	0.011778	0.28		0.999752	0.902907	0.000850692	0.00095046	0.000852953	00:00:00	226423	2022-07-15			3.31708e+08	2021-07-19	0	1
2021-01-30	1.18868e+07	0		0	0.4	17153.5	45108.2	1.78301e+08	2656.69	1.95184		0	2021-01-30	0.537516		0.6	0.00107522	0.00203978	0.487662	0.00496099	0.00595875	0.6	0.462484	1.12971	187900	0.011778	0.28		0.999759	0.902693	0.000849049	0.000947925	0.000851296	00:00:00	226456	2022-07-15			3.31713e+08	2021-07-19	0	1
2021-01-31	1.18893e+07	0		0	0.4	16665.8	43840.1	1.7834e+08	2580.73	1.95184		0	2021-01-31	0.537624		0.6	0.00104298	0.00198241	0.487664	0.00488428	0.00582615	0.6	0.462376	1.12971	188200	0.011778	0.28		0.999767	0.902486	0.00084741	0.000945399	0.000849644	00:00:00	226488	2022-07-15			3.31719e+08	2021-07-19	0	1
2021-02-01	1.1892e+07	0		0	0.4	16366.9	42780.5	1.7838e+08	2682.77	2.08888		0	2021-02-01	0.537737		1	0.00102265	0.00193446	0.521274	0.00483946	0.00571407	1	0.462263	1.12971	188500	0.011778	0		0.999757	0.965612	0.000845775	0.000942881	0.000847995	00:00:00	226521	2022-07-15			3.31724e+08	2021-07-19	0	1
2021-02-02	1.18947e+07	0		0	0.4	16147	41819.1	1.7842e+08	2677.22	2.12314		0	2021-02-02	0.537849		1	0.0010073	0.00189096	0.529	0.00480777	0.00561092	1	0.462151	1.12971	188800	0.011778	0		0.999757	0.981212	0.000844144	0.000940371	0.000846351	00:00:00	226554	2022-07-15			3.3173e+08	2021-07-19	0	1
2021-02-03	1.18974e+07	0		0	0.4	16026	40975.5	1.78461e+08	2693.86	2.16597		0	2021-02-03	0.537962		1	0.000998169	0.00185278	0.538312	0.00479353	0.00551895	1	0.462038	1.12971	189100	0.011778	0		0.999756	1.00076	0.000842517	0.000937869	0.00084471	00:00:00	226588	2022-07-15			3.31735e+08	2021-07-19	0	1
2021-02-04	1.19001e+07	0		0	0.4	16030.4	40275.9	1.78502e+08	2739.09	2.2195		0	2021-02-04	0.538077		1	0.00099686	0.00182112	0.549447	0.00480256	0.00544104	1	0.461923	1.12971	189400	0.011778	0		0.999751	1.02524	0.000840894	0.000935375	0.000843073	00:00:00	226621	2022-07-15			3.3174e+08	2021-07-19	0	1
2021-02-05	1.19029e+07	0		0	0.4	16153.1	39712.8	1.78544e+08	2779.45	2.25215		0	2021-02-05	0.538194		1	0.0010029	0.00179563	0.55598	0.00483467	0.00537646	1	0.461806	1.12971	189700	0.011778	0		0.999747	1.04006	0.000839275	0.000932889	0.000841441	00:00:00	226656	2022-07-15			3.31746e+08	2021-07-19	0	1
2021-02-06	1.19057e+07	0		0	0.4	16412.5	39304.1	1.78586e+08	2840.12	2.2844		0	2021-02-06	0.538313		1	0.0010174	0.00177712	0.562249	0.00489455	0.00532717	1	0.461687	1.12971	190000	0.011778	0		0.999741	1.05468	0.00083766	0.00093041	0.000839812	00:00:00	226691	2022-07-15			3.31751e+08	2021-07-19	0	1
2021-02-07	1.19087e+07	0		0	0.4	16652.1	39069.1	1.7863e+08	2922.38	2.31401		0	2021-02-07	0.538437		1	0.00103063	0.00176646	0.56785	0.00498753	0.00529521	1	0.461563	1.12971	190300	0.011778	0		0.999733	1.06806	0.000836048	0.00092794	0.000838187	00:00:00	226727	2022-07-15			3.31757e+08	2021-07-19	0	1
2021-02-08	1.19117e+07	0		0	0.4	16969.4	38995.2	1.78675e+08	2994.52	2.33764		0	2021-02-08	0.538563		1	0.00104861	0.00176309	0.572218	0.00511282	0.00527925	1	0.461437	1.12971	190600	0.011778	0		0.999726	1.07867	0.000834441	0.000925477	0.000836566	00:00:00	226764	2022-07-15			3.31762e+08	2021-07-19	0	1
2021-02-09	1.19147e+07	0		0	0.4	17354.2	39092.2	1.78721e+08	3078.64	2.35901		0	2021-02-09	0.538693		1	0.0010707	0.00176745	0.576094	0.00527421	0.00528028	1	0.461307	1.12971	190900	0.011778	0		0.999718	1.08823	0.000832837	0.000923023	0.000834949	00:00:00	226802	2022-07-15			3.31768e+08	2021-07-19	0	1
2021-02-10	1.19179e+07	0		0	0.4	17787.6	39367.5	1.78769e+08	3172.44	2.37767		0	2021-02-10	0.538828		1	0.00109572	0.00177987	0.57942	0.00547521	0.005299	1	0.461172	1.12971	191200	0.011778	0		0.999708	1.09651	0.000831237	0.000920576	0.000833336	00:00:00	226841	2022-07-15			3.31773e+08	2021-07-19	0	1
2021-02-11	1.19212e+07	0		0	0.4	18280.6	39825.1	1.78818e+08	3272.47	2.39358		0	2021-02-11	0.538967		1	0.00112433	0.00180053	0.582216	0.00571884	0.00533573	1	0.461033	1.12971	191500	0.011778	0		0.999698	1.10352	0.000829641	0.000918137	0.000831727	00:00:00	226882	2022-07-15			3.31779e+08	2021-07-19	0	1
2021-02-12	1.19246e+07	0		0	0.4	18822.3	40472.2	1.78869e+08	3381.81	2.40757		0	2021-02-12	0.539111		1	0.00115583	0.00182975	0.584643	0.00600898	0.00539108	1	0.460889	1.12971	191800	0.011778	0		0.999688	1.10962	0.000828049	0.000915705	0.000830122	00:00:00	226924	2022-07-15			3.31784e+08	2021-07-19	0	1
2021-02-13	1.19281e+07	0		0	0.4	19398.4	41314	1.78921e+08	3498.48	2.4197		0	2021-02-13	0.53926		1	0.00118935	0.00186778	0.586726	0.00634932	0.00546542	1	0.46074	1.12971	192100	0.011778	0		0.999676	1.11485	0.000826461	0.000913281	0.000828521	00:00:00	226967	2022-07-15			3.3179e+08	2021-07-19	0	1
2021-02-14	1.19317e+07	0		0	0.4	20023.9	42353.3	1.78975e+08	3620.04	2.43021		0	2021-02-14	0.539415		1	0.00122578	0.00191473	0.588513	0.00674322	0.00555887	1	0.460585	1.12971	192400	0.011778	0		0.999664	1.11932	0.000824876	0.000910865	0.000826923	00:00:00	227012	2022-07-15			3.31795e+08	2021-07-19	0	1
2021-02-15	1.19354e+07	0		0	0.4	20694.8	43420.1	1.79032e+08	3749.59	2.43937		0	2021-02-15	0.539576		1	0.00126489	0.00196293	0.590058	0.00716333	0.00565297	1	0.460424	1.12971	192700	0.011778	0		0.999651	1.12314	0.000823295	0.000908457	0.000825329	00:00:00	227058	2022-07-15			3.318e+08	2021-07-19	0	1
2021-02-16	1.19393e+07	0		0	0.4	21408.9	44629.4	1.7909e+08	3886.51	2.44732		0	2021-02-16	0.539743		1	0.0013065	0.00201757	0.59139	0.00763276	0.00575964	1	0.460257	1.12971	193000	0.011778	0		0.999638	1.1264	0.000821718	0.000906056	0.00082374	00:00:00	227106	2022-07-15			3.31806e+08	2021-07-19	0	1
2021-02-17	1.19434e+07	0		0	0.4	22166.9	45966	1.7915e+08	4030.49	2.45423		0	2021-02-17	0.539916		1	0.00135066	0.00207796	0.59254	0.00815174	0.00587695	1	0.460084	1.12971	193300	0.011778	0		0.999623	1.12915	0.000820145	0.000903663	0.000822154	00:00:00	227156	2022-07-15			3.31811e+08	2021-07-19	0	1
2021-02-18	1.19475e+07	0		0	0.4	22967	47408.8	1.79213e+08	4181.83	2.46023		0	2021-02-18	0.540096		1	0.00139723	0.00214315	0.593534	0.00871922	0.00600227	1	0.459904	1.12971	193600	0.011778	0		0.999608	1.13147	0.000818576	0.000901277	0.000820571	00:00:00	227208	2022-07-15			3.31817e+08	2021-07-19	0	1
2021-02-19	1.19519e+07	0		0	0.4	23808.7	48969.6	1.79278e+08	4340.24	2.46544		0	2021-02-19	0.540284		1	0.0014462	0.00221367	0.594394	0.00934038	0.00613656	1	0.459716	1.12971	193900	0.011778	0		0.999593	1.13341	0.00081701	0.000898898	0.000818993	00:00:00	227261	2022-07-15			3.31822e+08	2021-07-19	0	1
2021-02-20	1.19564e+07	0		0	0.4	24694.4	50635.2	1.79346e+08	4505.75	2.46997		0	2021-02-20	0.540478		1	0.00149769	0.00228892	0.595138	0.0100156	0.00627806	1	0.459522	1.12971	194200	0.011778	0		0.999576	1.13501	0.000815448	0.000896528	0.000817418	00:00:00	227317	2022-07-15			3.31828e+08	2021-07-19	0	1
2021-02-21	1.19611e+07	0		0	0.4	25623.7	52391.7	1.79416e+08	4678.84	2.47391		0	2021-02-21	0.540681		1	0.00155165	0.00236828	0.595782	0.0107451	0.00642494	1	0.459319	1.12971	194500	0.011778	0		0.999559	1.13631	0.00081389	0.000894164	0.000815847	00:00:00	227375	2022-07-15			3.31833e+08	2021-07-19	0	1
2021-02-22	1.19659e+07	0		0	0.4	26596.6	54256.6	1.79489e+08	4859.47	2.47733		0	2021-02-22	0.540892		1	0.00160808	0.00245255	0.59634	0.0115353	0.00657868	1	0.459108	1.12971	194800	0.011778	0		0.999541	1.13736	0.000812335	0.000891808	0.00081428	00:00:00	227435	2022-07-15			3.31839e+08	2021-07-19	0	1
2021-02-23	1.1971e+07	0		0	0.4	27613.9	56225.7	1.79564e+08	5047.72	2.4803		0	2021-02-23	0.541111		1	0.00166702	0.00254151	0.596824	0.0123882	0.00673844	1	0.458889	1.12971	195100	0.011778	0		0.999522	1.13818	0.000810784	0.00088946	0.000812717	00:00:00	227498	2022-07-15			3.31844e+08	2021-07-19	0	1
2021-02-24	1.19762e+07	0		0	0.4	28675.8	58297	1.79643e+08	5243.73	2.48289		0	2021-02-24	0.541339		1	0.00172847	0.00263509	0.597243	0.0133062	0.00690364	1	0.458661	1.12971	195400	0.011778	0		0.999503	1.1388	0.000809237	0.000887118	0.000811157	00:00:00	227562	2022-07-15			3.3185e+08	2021-07-19	0	1
2021-02-25	1.19817e+07	0		0	0.4	29783.1	60472.1	1.79725e+08	5447.59	2.48513		0	2021-02-25	0.541577		1	0.00179246	0.00273337	0.597607	0.0142923	0.00707406	1	0.458423	1.12971	195700	0.011778	0		0.999483	1.13924	0.000807694	0.000884784	0.000809601	00:00:00	227630	2022-07-15			3.31855e+08	2021-07-19	0	1
2021-02-26	1.19873e+07	0		0	0.4	30936.8	62749.8	1.7981e+08	5659.47	2.48708		0	2021-02-26	0.541823		1	0.00185905	0.00283627	0.597922	0.0153489	0.00724917	1	0.458177	1.12971	196000	0.011778	0		0.999461	1.13952	0.000806154	0.000882458	0.000808049	00:00:00	227700	2022-07-15			3.3186e+08	2021-07-19	0	1
2021-02-27	1.19932e+07	0		0	0.4	32137.5	65130.8	1.79898e+08	5879.54	2.48877		0	2021-02-27	0.54208		1	0.00192825	0.00294385	0.598196	0.0164785	0.00742864	1	0.45792	1.12971	196300	0.011778	0		0.999439	1.13966	0.000804618	0.000880138	0.0008065	00:00:00	227772	2022-07-15			3.31866e+08	2021-07-19	0	1
2021-02-28	1.19993e+07	0		0	0.4	33386	67618.7	1.7999e+08	6107.91	2.49025		0	2021-02-28	0.542347		1	0.0020001	0.00305625	0.598433	0.017684	0.00761242	1	0.457653	1.12971	196600	0.011778	0		0.999417	1.13967	0.000803085	0.000877826	0.000804956	00:00:00	227848	2022-07-15			3.31871e+08	2021-07-19	0	1
2021-03-01	1.20056e+07	0		0	0.4	34683	70213.9	1.80085e+08	6344.74	2.49153		0	2021-03-01	0.542625		1	0.00207464	0.00317349	0.598639	0.0189671	0.00780011	1	0.457375	1.12971	196900	0.011778	0		0.999393	1.13956	0.000801556	0.000875521	0.000803414	00:00:00	227926	2022-07-15			3.31877e+08	2021-07-19	0	1
2021-03-02	1.20122e+07	0		0	0.4	36029.4	72917.5	1.80184e+08	6590.17	2.49264		0	2021-03-02	0.542914		1	0.0021519	0.00329563	0.598818	0.0203294	0.00799142	1	0.457086	1.12971	197200	0.011778	0		0.999368	1.13935	0.000800031	0.000873224	0.000801877	00:00:00	228008	2022-07-15			3.31882e+08	2021-07-19	0	1
2021-03-03	1.20191e+07	0		0	0.4	37426.2	75731.4	1.80286e+08	6844.33	2.4936		0	2021-03-03	0.543215		1	0.00223192	0.00342275	0.598974	0.0217723	0.00818608	1	0.456785	1.12971	197500	0.011778	0		0.999343	1.13904	0.000798509	0.000870933	0.000800343	00:00:00	228093	2022-07-15			3.31888e+08	2021-07-19	0	1
2021-03-04	1.20262e+07	0		0	0.4	38874.1	78656.9	1.80393e+08	7107.38	2.49444		0	2021-03-04	0.543527		1	0.00231475	0.00355492	0.599109	0.0232961	0.00838377	1	0.456473	1.12971	197800	0.011778	0		0.999316	1.13865	0.000796991	0.00086865	0.000798813	00:00:00	228180	2022-07-15			3.31893e+08	2021-07-19	0	1
2021-03-05	1.20336e+07	0		0	0.4	40374	81696.1	1.80504e+08	7379.45	2.49517		0	2021-03-05	0.543851		1	0.00240043	0.00369222	0.599226	0.024901	0.00858426	1	0.456149	1.12971	198100	0.011778	0		0.999289	1.13817	0.000795476	0.000866373	0.000797286	00:00:00	228272	2022-07-15			3.31899e+08	2021-07-19	0	1
2021-03-06	1.20412e+07	0		0	0.4	41926.7	84851	1.80618e+08	7660.68	2.4958		0	2021-03-06	0.544189		1	0.00248897	0.00383474	0.599327	0.0265859	0.00878726	1	0.455811	1.12971	198400	0.011778	0		0.999261	1.13762	0.000793965	0.000864104	0.000795763	00:00:00	228366	2022-07-15			3.31904e+08	2021-07-19	0	1
2021-03-07	1.20492e+07	0		0	0.4	43533.2	88123.4	1.80738e+08	7951.17	2.49635		0	2021-03-07	0.544539		1	0.00258044	0.00398256	0.599416	0.0283492	0.0089925	1	0.455461	1.12971	198700	0.011778	0		0.999231	1.13699	0.000792458	0.000861842	0.000794244	00:00:00	228465	2022-07-15			3.3191e+08	2021-07-19	0	1
2021-03-08	1.20574e+07	0		0	0.4	45194.1	91514.9	1.80862e+08	8251.05	2.49683		0	2021-03-08	0.544903		1	0.00267485	0.00413577	0.599492	0.0301878	0.00919966	1	0.455097	1.12971	199000	0.011778	0		0.999201	1.1363	0.000790954	0.000859586	0.000792728	00:00:00	228567	2022-07-15			3.31915e+08	2021-07-19	0	1
2021-03-09	1.2066e+07	0		0	0.4	46910.2	95027.7	1.8099e+08	8560.43	2.49725		0	2021-03-09	0.545281		1	0.00277224	0.00429445	0.599559	0.0320979	0.00940847	1	0.454719	1.12971	199300	0.011778	0		0.99917	1.13555	0.000789454	0.000857338	0.000791216	00:00:00	228673	2022-07-15			3.3192e+08	2021-07-19	0	1
2021-03-10	1.20749e+07	0		0	0.4	48682.2	98663.3	1.81123e+08	8879.39	2.49761		0	2021-03-10	0.545673		1	0.00287263	0.00445867	0.599617	0.0340741	0.00961861	1	0.454327	1.12971	199600	0.011778	0		0.999137	1.13473	0.000787957	0.000855097	0.000789707	00:00:00	228783	2022-07-15			3.31926e+08	2021-07-19	0	1
2021-03-11	1.20841e+07	0		0	0.4	50510.7	102424	1.81261e+08	9208.01	2.49792		0	2021-03-11	0.54608		1	0.00297606	0.00462853	0.599667	0.0361098	0.00982978	1	0.45392	1.12971	199900	0.011778	0		0.999104	1.13386	0.000786464	0.000852862	0.000788202	00:00:00	228896	2022-07-15			3.31931e+08	2021-07-19	0	1
2021-03-12	1.20936e+07	0		0	0.4	52396.4	106311	1.81404e+08	9546.35	2.49819		0	2021-03-12	0.546503		1	0.00308254	0.0048041	0.599711	0.0381969	0.0100417	1	0.453497	1.12971	200200	0.011778	0		0.999069	1.13292	0.000784974	0.000850635	0.0007867	00:00:00	229014	2022-07-15			3.31937e+08	2021-07-19	0	1
2021-03-13	1.21035e+07	0		0	0.4	54339.7	110326	1.81553e+08	9894.46	2.49843		0	2021-03-13	0.546941		1	0.00319208	0.00498545	0.599749	0.0403258	0.0102539	1	0.453059	1.12971	200500	0.011778	0		0.999034	1.13194	0.000783488	0.000848414	0.000785202	00:00:00	229137	2022-07-15			3.31942e+08	2021-07-19	0	1
2021-03-14	1.21138e+07	0		0	0.4	56341	114470	1.81707e+08	10252.4	2.49864		0	2021-03-14	0.547395		1	0.0033047	0.00517265	0.599782	0.0424853	0.0104662	1	0.452605	1.12971	200800	0.011778	0		0.998997	1.13089	0.000782005	0.0008462	0.000783708	00:00:00	229264	2022-07-15			3.31948e+08	2021-07-19	0	1
2021-03-15	1.21244e+07	0		0	0.4	58400.6	118745	1.81866e+08	10620.1	2.49882		0	2021-03-15	0.547866		1	0.0034204	0.00536575	0.59981	0.0446628	0.0106782	1	0.452134	1.12971	201100	0.011778	0		0.99896	1.1298	0.000780525	0.000843993	0.000782217	00:00:00	229395	2022-07-15			3.31953e+08	2021-07-19	0	1
2021-03-16	1.21354e+07	0		0	0.4	60518.8	123153	1.82031e+08	10997.5	2.49897		0	2021-03-16	0.548354		1	0.00353917	0.00556482	0.599835	0.0468439	0.0108896	1	0.451646	1.12971	201400	0.011778	0		0.998921	1.12865	0.00077905	0.000841793	0.000780729	00:00:00	229531	2022-07-15			3.31959e+08	2021-07-19	0	1
2021-03-17	1.21468e+07	0		0	0.4	62695.4	127693	1.82202e+08	11384.7	2.49911		0	2021-03-17	0.548859		1	0.00366101	0.00576989	0.599857	0.049013	0.0111	1	0.451141	1.12971	201700	0.011778	0		0.998881	1.12745	0.000777577	0.0008396	0.000779245	00:00:00	229672	2022-07-15			3.31964e+08	2021-07-19	0	1
2021-03-18	1.21586e+07	0		0	0.4	64930.6	132367	1.82378e+08	11781.5	2.49922		0	2021-03-18	0.549383		1	0.0037859	0.00598099	0.599876	0.0511531	0.011309	1	0.450617	1.12971	202000	0.011778	0		0.99884	1.12619	0.000776108	0.000837413	0.000777765	00:00:00	229817	2022-07-15			3.3197e+08	2021-07-19	0	1
2021-03-19	1.21707e+07	0		0	0.4	67224	137176	1.82561e+08	12187.9	2.49932		0	2021-03-19	0.549924		1	0.00391381	0.00619816	0.599892	0.0532461	0.0115162	1	0.450076	1.12971	202300	0.011778	0		0.998798	1.12488	0.000774642	0.000835233	0.000776288	00:00:00	229968	2022-07-15			3.31975e+08	2021-07-19	0	1
2021-03-20	1.21833e+07	0		0	0.4	69575.4	142119	1.8275e+08	12603.7	2.49941		0	2021-03-20	0.550485		1	0.00404471	0.0064214	0.599906	0.055273	0.0117213	1	0.449515	1.12971	202600	0.011778	0		0.998755	1.12352	0.00077318	0.00083306	0.000774814	00:00:00	230124	2022-07-15			3.3198e+08	2021-07-19	0	1
2021-03-21	1.21964e+07	0		0	0.4	71984	147196	1.82946e+08	13028.7	2.49949		0	2021-03-21	0.551065		1	0.00417854	0.00665071	0.599918	0.0572141	0.0119239	1	0.448935	1.12971	202900	0.011778	0		0.998711	1.12211	0.000771722	0.000830893	0.000773344	00:00:00	230285	2022-07-15			3.31986e+08	2021-07-19	0	1
2021-03-22	1.22098e+07	0		0	0.4	74449.1	152408	1.83148e+08	13462.7	2.49956		0	2021-03-22	0.551664		1	0.00431526	0.00688607	0.599929	0.0590494	0.0121235	1	0.448336	1.12971	203200	0.011778	0		0.998665	1.12064	0.000770266	0.000828733	0.000771878	00:00:00	230452	2022-07-15			3.31991e+08	2021-07-19	0	1
2021-03-23	1.22237e+07	0		0	0.4	76969.9	157753	1.83356e+08	13905.5	2.49962		0	2021-03-23	0.552283		1	0.00445479	0.00712745	0.599938	0.0607591	0.0123199	1	0.447717	1.12971	203500	0.011778	0		0.998619	1.11912	0.000768814	0.00082658	0.000770414	00:00:00	230624	2022-07-15			3.31997e+08	2021-07-19	0	1
2021-03-24	1.22381e+07	0		0	0.4	79545.1	163230	1.83572e+08	14356.7	2.49967		0	2021-03-24	0.552923		1	0.00459706	0.0073748	0.599947	0.0623236	0.0125125	1	0.447077	1.12971	203800	0.011778	0		0.998571	1.11754	0.000767366	0.000824433	0.000768955	00:00:00	230801	2022-07-15			3.32002e+08	2021-07-19	0	1
2021-03-25	1.22529e+07	0		0	0.4	82173.3	168838	1.83794e+08	14816.1	2.49971		0	2021-03-25	0.553583		1	0.00474197	0.00762805	0.599954	0.0637242	0.012701	1	0.446417	1.12971	204100	0.011778	0		0.998523	1.11591	0.00076592	0.000822292	0.000767498	00:00:00	230984	2022-07-15			3.32008e+08	2021-07-19	0	1
2021-03-26	1.22682e+07	0		0	0.4	84852.9	174575	1.84023e+08	15283.3	2.49975		0	2021-03-26	0.554264		1	0.00488942	0.00788712	0.59996	0.0649438	0.012885	1	0.445736	1.12971	204400	0.011778	0		0.998474	1.11423	0.000764478	0.000820159	0.000766045	00:00:00	231173	2022-07-15			3.32013e+08	2021-07-19	0	1
2021-03-27	1.2284e+07	0		0	0.4	87582	180438	1.84259e+08	15757.8	2.49978		0	2021-03-27	0.554967		1	0.00503928	0.00815188	0.599965	0.0659665	0.0130641	1	0.445033	1.12971	204700	0.011778	0		0.998423	1.11248	0.00076304	0.000818031	0.000764595	00:00:00	231368	2022-07-15			3.32019e+08	2021-07-19	0	1
2021-03-28	1.23002e+07	0		0	0.4	90358.5	186425	1.84503e+08	16239.1	2.49981		0	2021-03-28	0.555692		1	0.00519142	0.00842221	0.59997	0.0667788	0.0132378	1	0.444308	1.12971	205000	0.011778	0		0.998372	1.11069	0.000761605	0.000815911	0.000763149	00:00:00	231569	2022-07-15			3.32024e+08	2021-07-19	0	1
2021-03-29	1.23169e+07	0		0	0.4	93179.9	192532	1.84754e+08	16726.8	2.49983		0	2021-03-29	0.556438		1	0.00534569	0.00869796	0.599974	0.0673695	0.0134059	1	0.443562	1.12971	205300	0.011778	0		0.99832	1.10883	0.000760173	0.000813796	0.000761706	00:00:00	231776	2022-07-15			3.3203e+08	2021-07-19	0	1
2021-03-30	1.23341e+07	0		0	0.4	96043.4	198755	1.85012e+08	17220.3	2.49986		0	2021-03-30	0.557207		1	0.00550194	0.00897893	0.599977	0.06773	0.0135678	1	0.442793	1.12971	205600	0.011778	0		0.998267	1.10692	0.000758744	0.000811689	0.000760267	00:00:00	231989	2022-07-15			3.32035e+08	2021-07-19	0	1
2021-03-31	1.23519e+07	0		0	0.4	98946.2	205089	1.85278e+08	17718.9	2.49988		0	2021-03-31	0.557998		1	0.00565996	0.00926493	0.59998	0.0678549	0.0137233	1	0.442002	1.12971	205900	0.011778	0		0.998213	1.10495	0.000757319	0.000809587	0.000758831	00:00:00	232208	2022-07-15			3.32041e+08	2021-07-19	0	1
2021-04-01	1.23701e+07	0		0	0.4	101885	211529	1.85551e+08	18221.9	2.49989		0	2021-04-01	0.558812		1	0.00581958	0.00955572	0.599983	0.0677417	0.0138718	1	0.441188	1.12971	206200	0.011778	0		0.998158	1.10292	0.000755897	0.000807492	0.000757398	00:00:00	232433	2022-07-15			3.32046e+08	2021-07-19	0	1
2021-04-02	1.23888e+07	0		0	0.4	104856	218070	1.85832e+08	18728.6	2.49991		0	2021-04-02	0.559649		1	0.00598057	0.00985103	0.599985	0.0673911	0.0140132	1	0.440351	1.12971	206500	0.011778	0		0.998103	1.10084	0.000754478	0.000805403	0.000755968	00:00:00	232665	2022-07-15			3.32051e+08	2021-07-19	0	1
2021-04-03	1.24081e+07	0		0	0.4	107855	224704	1.86121e+08	19238.2	2.49992		0	2021-04-03	0.560509		1	0.0061427	0.0101506	0.599987	0.066807	0.0141469	1	0.439491	1.12971	206800	0.011778	0		0.998047	1.09869	0.000753063	0.000803321	0.000754542	00:00:00	232903	2022-07-15			3.32057e+08	2021-07-19	0	1
2021-04-04	1.24278e+07	0		0	0.4	110878	231426	1.86417e+08	19749.9	2.49993		0	2021-04-04	0.561392		1	0.00630573	0.010454	0.599989	0.0659965	0.0142728	1	0.438608	1.12971	207100	0.011778	0		0.997991	1.09649	0.000751651	0.000801245	0.000753119	00:00:00	233147	2022-07-15			3.32062e+08	2021-07-19	0	1
2021-04-05	1.24481e+07	0		0	0.4	113920	238226	1.86721e+08	20262.8	2.49994		0	2021-04-05	0.562298		1	0.00646939	0.010761	0.59999	0.0649694	0.0143904	1	0.437702	1.12971	207400	0.011778	0		0.997934	1.09423	0.000750242	0.000799175	0.000751699	00:00:00	233398	2022-07-15			3.32068e+08	2021-07-19	0	1
2021-04-06	1.24688e+07	0		0	0.4	116977	245096	1.87033e+08	20775.9	2.49995		0	2021-04-06	0.563227		1	0.0066334	0.0110712	0.599991	0.0637384	0.0144994	1	0.436773	1.12971	207700	0.011778	0		0.997877	1.09191	0.000748836	0.000797112	0.000750283	00:00:00	233655	2022-07-15			3.32073e+08	2021-07-19	0	1
2021-04-07	1.24901e+07	0		0	0.4	120044	252028	1.87352e+08	21288.1	2.49995		0	2021-04-07	0.564179		1	0.00679746	0.0113841	0.599993	0.0623183	0.0145996	1	0.435821	1.12971	208000	0.011778	0		0.99782	1.08953	0.000747434	0.000795054	0.00074887	00:00:00	233918	2022-07-15			3.32079e+08	2021-07-19	0	1
2021-04-08	1.25119e+07	0		0	0.4	123114	259010	1.87679e+08	21798.6	2.49996		0	2021-04-08	0.565155		1	0.00696125	0.0116993	0.599994	0.0607261	0.0146907	1	0.434845	1.12971	208300	0.011778	0		0.997762	1.0871	0.000746034	0.000793003	0.00074746	00:00:00	234188	2022-07-15			3.32084e+08	2021-07-19	0	1
2021-04-09	1.25342e+07	0		0	0.4	126181	266033	1.88014e+08	22306.1	2.49996		0	2021-04-09	0.566153		1	0.00712446	0.0120163	0.599994	0.0589804	0.0147724	1	0.433847	1.12971	208600	0.011778	0		0.997704	1.0846	0.000744638	0.000790958	0.000746054	00:00:00	234463	2022-07-15			3.3209e+08	2021-07-19	0	1
2021-04-10	1.2557e+07	0		0	0.4	129241	273085	1.88356e+08	22809.5	2.49997		0	2021-04-10	0.567174		1	0.00728673	0.0123346	0.599995	0.0571007	0.0148445	1	0.432826	1.12971	208900	0.011778	0		0.997647	1.08205	0.000743246	0.00078892	0.00074465	00:00:00	234746	2022-07-15			3.32095e+08	2021-07-19	0	1
2021-04-11	1.25804e+07	0		0	0.4	132286	280153	1.88705e+08	23307.6	2.49997		0	2021-04-11	0.568217		1	0.0074477	0.0126537	0.599996	0.0551075	0.0149069	1	0.431783	1.12971	209200	0.011778	0		0.997589	1.07945	0.000741856	0.000786887	0.00074325	00:00:00	235034	2022-07-15			3.32101e+08	2021-07-19	0	1
2021-04-12	1.26042e+07	0		0	0.4	135309	287225	1.89062e+08	23799.2	2.49998		0	2021-04-12	0.569283		1	0.00760701	0.0129729	0.599996	0.0530216	0.0149592	1	0.430717	1.12971	209500	0.011778	0		0.997532	1.07678	0.00074047	0.000784861	0.000741853	00:00:00	235328	2022-07-15			3.32106e+08	2021-07-19	0	1
2021-04-13	1.26284e+07	0		0	0.4	138304	294288	1.89427e+08	24283.1	2.49998		0	2021-04-13	0.57037		1	0.00776427	0.0132917	0.599997	0.0508634	0.0150015	1	0.42963	1.12971	209800	0.011778	0		0.997475	1.07407	0.000739086	0.00078284	0.00074046	00:00:00	235628	2022-07-15			3.32111e+08	2021-07-19	0	1
2021-04-14	1.26532e+07	0		0	0.4	141263	301327	1.89798e+08	24758	2.49998		0	2021-04-14	0.571479		1	0.00791908	0.0136094	0.599997	0.0486533	0.0150336	1	0.428521	1.12971	210100	0.011778	0		0.997419	1.07129	0.000737706	0.000780826	0.000739069	00:00:00	235935	2022-07-15			3.32117e+08	2021-07-19	0	1
2021-04-15	1.26784e+07	0		0	0.4	144180	308328	1.90176e+08	25222.5	2.49998		0	2021-04-15	0.572609		1	0.00807105	0.0139254	0.599998	0.0464104	0.0150553	1	0.427391	1.12971	210400	0.011778	0		0.997364	1.06847	0.000736329	0.000778818	0.000737682	00:00:00	236246	2022-07-15			3.32122e+08	2021-07-19	0	1
2021-04-16	1.27041e+07	0		0	0.4	147046	315275	1.90561e+08	25675.4	2.49999		0	2021-04-16	0.573759		1	0.00821976	0.0142389	0.599998	0.0441531	0.0150666	1	0.426241	1.12971	210700	0.011778	0		0.997309	1.0656	0.000734956	0.000776816	0.000736298	00:00:00	236564	2022-07-15			3.32128e+08	2021-07-19	0	1
2021-04-17	1.27302e+07	0		0	0.4	149853	322152	1.90953e+08	26115.3	2.49999		0	2021-04-17	0.574929		1	0.00836479	0.0145492	0.599998	0.0418984	0.0150675	1	0.425071	1.12971	211000	0.011778	0		0.997255	1.06267	0.000733585	0.000774819	0.000734917	00:00:00	236887	2022-07-15			3.32133e+08	2021-07-19	0	1
2021-04-18	1.27567e+07	0		0	0.4	152595	328943	1.91351e+08	26540.9	2.49999		0	2021-04-18	0.576118		1	0.00850574	0.0148557	0.599998	0.0396616	0.0150579	1	0.423882	1.12971	211300	0.011778	0		0.997202	1.0597	0.000732217	0.000772829	0.000733539	00:00:00	237215	2022-07-15			3.32139e+08	2021-07-19	0	1
2021-04-19	1.27837e+07	0		0	0.4	155263	335631	1.91755e+08	26950.9	2.49999		0	2021-04-19	0.577326		1	0.00864217	0.0151575	0.599999	0.0374567	0.0150379	1	0.422674	1.12971	211600	0.011778	0		0.997151	1.05668	0.000730853	0.000770845	0.000732165	00:00:00	237548	2022-07-15			3.32144e+08	2021-07-19	0	1
2021-04-20	1.2811e+07	0		0	0.4	157849	342199	1.92166e+08	27343.9	2.49999		0	2021-04-20	0.578551		1	0.00877367	0.0154538	0.599999	0.0352958	0.0150075	1	0.421449	1.12971	211900	0.011778	0		0.997101	1.05362	0.000729492	0.000768867	0.000730793	00:00:00	237887	2022-07-15			3.3215e+08	2021-07-19	0	1
2021-04-21	1.28388e+07	0		0	0.4	160345	348630	1.92581e+08	27718.7	2.49999		0	2021-04-21	0.579794		1	0.00889982	0.015744	0.599999	0.0331894	0.0149668	1	0.420206	1.12971	212200	0.011778	0		0.997052	1.05051	0.000728134	0.000766894	0.000729425	00:00:00	238229	2022-07-15			3.32155e+08	2021-07-19	0	1
2021-04-22	1.28668e+07	0		0	0.4	162744	354905	1.93003e+08	28074.1	2.49999		0	2021-04-22	0.581052		1	0.0090202	0.0160271	0.599999	0.0311464	0.0149159	1	0.418948	1.12971	212500	0.011778	0		0.997006	1.04737	0.000726778	0.000764928	0.00072806	00:00:00	238577	2022-07-15			3.32161e+08	2021-07-19	0	1
2021-04-23	1.28952e+07	0		0	0.4	165037	361008	1.93429e+08	28408.8	2.5		0	2021-04-23	0.582325		1	0.00913443	0.0163024	0.599999	0.0291739	0.014855	1	0.417675	1.12971	212800	0.011778	0		0.996961	1.04419	0.000725426	0.000762967	0.000726698	00:00:00	238928	2022-07-15			3.32166e+08	2021-07-19	0	1
2021-04-24	1.2924e+07	0		0	0.4	167218	366920	1.93859e+08	28721.6	2.5		0	2021-04-24	0.583613		1	0.0092421	0.0165691	0.599999	0.0272778	0.0147841	1	0.416387	1.12971	213100	0.011778	0		0.996918	1.04097	0.000724077	0.000761012	0.000725339	00:00:00	239283	2022-07-15			3.32172e+08	2021-07-19	0	1
2021-04-25	1.2953e+07	0		0	0.4	169279	372624	1.94295e+08	29011.4	2.5		0	2021-04-25	0.584913		1	0.00934283	0.0168264	0.599999	0.0254621	0.0147036	1	0.415087	1.12971	213400	0.011778	0		0.996877	1.03772	0.000722732	0.000759063	0.000723983	00:00:00	239642	2022-07-15			3.32177e+08	2021-07-19	0	1
2021-04-26	1.29823e+07	0		0	0.4	171212	378102	1.94734e+08	29277.2	2.5		0	2021-04-26	0.586225		1	0.00943626	0.0170735	0.599999	0.0237299	0.0146135	1	0.413775	1.12971	213700	0.011778	0		0.996838	1.03444	0.000721389	0.00075712	0.00072263	00:00:00	240004	2022-07-15			3.32182e+08	2021-07-19	0	1
2021-04-27	1.30118e+07	0		0	0.4	173011	383336	1.95177e+08	29517.9	2.5		0	2021-04-27	0.587549		1	0.00952206	0.0173096	0.6	0.022083	0.0145141	1	0.412451	1.12971	214000	0.011778	0		0.996802	1.03113	0.000720049	0.000755183	0.000721281	00:00:00	240369	2022-07-15			3.32188e+08	2021-07-19	0	1
2021-04-28	1.30415e+07	0		0	0.4	174670	388311	1.95623e+08	29732.7	2.5		0	2021-04-28	0.588882		1	0.00959989	0.017534	0.6	0.020522	0.0144057	1	0.411118	1.12971	214300	0.011778	0		0.996768	1.0278	0.000718712	0.000753251	0.000719934	00:00:00	240737	2022-07-15			3.32193e+08	2021-07-19	0	1
2021-04-29	1.30714e+07	0		0	0.4	176182	393009	1.96071e+08	29920.8	2.5		0	2021-04-29	0.590223		1	0.00966945	0.0177458	0.6	0.0190468	0.0142886	1	0.409777	1.12971	214600	0.011778	0		0.996737	1.02444	0.000717378	0.000751325	0.000718591	00:00:00	241107	2022-07-15			3.32199e+08	2021-07-19	0	1
2021-04-30	1.31015e+07	0		0	0.4	177541	397415	1.96523e+08	30081.3	2.5		0	2021-04-30	0.591571		1	0.00973047	0.0179445	0.6	0.0176564	0.0141629	1	0.408429	1.12971	214900	0.011778	0		0.996709	1.02107	0.000716048	0.000749405	0.00071725	00:00:00	241479	2022-07-15			3.32204e+08	2021-07-19	0	1
2021-05-01	1.31287e+07	0		0	0.4	175722	398492	1.9693e+08	27192.3	2.5		0	2021-05-01	0.59279		1	0.00961735	0.0179928	0.555555	0.0162834	0.0139361	1	0.40721	1.12971	215200	0.011778	0		0.997018	1.01803	0.00071472	0.000747491	0.000715913	00:00:00	241815	2022-07-15			3.3221e+08	2021-07-19	0	0.9
2021-05-02	1.31555e+07	0		0	0.4	173278	398785	1.97333e+08	26833.4	2.5		0	2021-05-02	0.593991		1	0.0094704	0.0180057	0.555555	0.0149896	0.0136897	1	0.406009	1.12971	215500	0.011778	0		0.997049	1.01502	0.000713395	0.000745582	0.000714578	00:00:00	242147	2022-07-15			3.32215e+08	2021-07-19	0	0.9
2021-05-03	1.31819e+07	0		0	0.4	170143	398216	1.97729e+08	26382.2	2.5		0	2021-05-03	0.595173		1	0.00928609	0.0179798	0.555555	0.0137718	0.0134224	1	0.404827	1.12971	215800	0.011778	0		0.99709	1.01207	0.000712074	0.000743679	0.000713247	00:00:00	242473	2022-07-15			3.32221e+08	2021-07-19	0	0.9
2021-05-04	1.32077e+07	0		0	0.4	166239	396702	1.98116e+08	25829.4	2.5		0	2021-05-04	0.596329		1	0.00906046	0.0179111	0.555555	0.0126265	0.0131329	1	0.403671	1.12971	216100	0.011778	0		0.997143	1.00918	0.000710755	0.000741781	0.000711919	00:00:00	242793	2022-07-15			3.32226e+08	2021-07-19	0	0.9
2021-05-05	1.32329e+07	0		0	0.4	161483	394148	1.98494e+08	25164.7	2.5		0	2021-05-05	0.597456		1	0.00878904	0.0177955	0.555555	0.0115497	0.0128194	1	0.402544	1.12971	216400	0.011778	0		0.99721	1.00636	0.000709439	0.00073989	0.000710593	00:00:00	243104	2022-07-15			3.32232e+08	2021-07-19	0	0.9
2021-05-06	1.32573e+07	0		0	0.4	155779	390450	1.98859e+08	24376.6	2.5		0	2021-05-06	0.598546		1	0.00846681	0.0176282	0.555555	0.0105376	0.0124799	1	0.401454	1.12971	216700	0.011778	0		0.99729	1.00363	0.000708126	0.000738003	0.000709271	00:00:00	243405	2022-07-15			3.32237e+08	2021-07-19	0	0.9
2021-05-07	1.32807e+07	0		0	0.4	152038	385493	1.99211e+08	23451.7	2.5		0	2021-05-07	0.599595		1	0.00825208	0.0174041	0.555555	0.00958568	0.0121123	1	0.400405	1.12971	217000	0.011778	0		0.997387	1.00101	0.000706816	0.000736123	0.000707952	00:00:00	243695	2022-07-15			3.32243e+08	2021-07-19	0	0.9
2021-05-08	1.33036e+07	0		0	0.4	148033	379600	1.99553e+08	22828.8	2.5		0	2021-05-08	0.600616		1	0.00802363	0.0171378	0.555555	0.008697	0.011727	1	0.399384	1.12971	217300	0.011778	0		0.997451	0.99846	0.00070551	0.000734247	0.000706635	00:00:00	243978	2022-07-15			3.32248e+08	2021-07-19	0	0.9
2021-05-09	1.33257e+07	0		0	0.4	143822	372760	1.99886e+08	22170.8	2.5		0	2021-05-09	0.601607		1	0.00778462	0.0168287	0.555555	0.00786806	0.0113245	1	0.398393	1.12971	217600	0.011778	0		0.997519	0.995982	0.000704206	0.000732378	0.000705322	00:00:00	244252	2022-07-15			3.32253e+08	2021-07-19	0	0.9
2021-05-10	1.33472e+07	0		0	0.4	139479	364969	2.00208e+08	21486.6	2.5		0	2021-05-10	0.602567		1	0.00753917	0.0164767	0.555555	0.00709555	0.0109055	1	0.397433	1.12971	217900	0.011778	0		0.99759	0.993582	0.000702905	0.000730514	0.000704011	00:00:00	244518	2022-07-15			3.32259e+08	2021-07-19	0	0.9
2021-05-11	1.3368e+07	0		0	0.4	135102	356239	2.0052e+08	20787.6	2.5		0	2021-05-11	0.603496		1	0.00729253	0.0160823	0.555555	0.00637631	0.0104707	1	0.396504	1.12971	218200	0.011778	0		0.997664	0.99126	0.000701606	0.000728655	0.000702704	00:00:00	244775	2022-07-15			3.32264e+08	2021-07-19	0	0.9
2021-05-12	1.33881e+07	0		0	0.4	130814	346594	2.00821e+08	20088.2	2.5		0	2021-05-12	0.604393		1	0.00705136	0.0156467	0.555555	0.0057074	0.0100217	1	0.395607	1.12971	218500	0.011778	0		0.997738	0.989018	0.000700311	0.000726802	0.000701399	00:00:00	245023	2022-07-15			3.3227e+08	2021-07-19	0	0.9
2021-05-13	1.34075e+07	0		0	0.4	126769	336080	2.01113e+08	19406.6	2.5		0	2021-05-13	0.605259		1	0.00682394	0.0151718	0.555556	0.00508614	0.00955991	1	0.394741	1.12971	218800	0.011778	0		0.997811	0.986853	0.000699019	0.000724954	0.000700098	00:00:00	245263	2022-07-15			3.32275e+08	2021-07-19	0	0.9
2021-05-14	1.34263e+07	0		0	0.4	122705	324764	2.01394e+08	18765.3	2.5		0	2021-05-14	0.606096		1	0.00659616	0.0146607	0.555556	0.00451012	0.00908777	1	0.393904	1.12971	219100	0.011778	0		0.997879	0.98476	0.00069773	0.000723112	0.000698799	00:00:00	245495	2022-07-15			3.32281e+08	2021-07-19	0	0.9
2021-05-15	1.34444e+07	0		0	0.4	118660	315697	2.01666e+08	18125.3	2.5		0	2021-05-15	0.606904		1	0.00636996	0.0142511	0.555556	0.00404223	0.00869938	1	0.393096	1.12971	219400	0.011778	0		0.997948	0.982739	0.000696443	0.000721275	0.000697503	00:00:00	245719	2022-07-15			3.32286e+08	2021-07-19	0	0.9
2021-05-16	1.34619e+07	0		0	0.4	114665	306355	2.01928e+08	17491.7	2.5		0	2021-05-16	0.607684		1	0.0061471	0.0138292	0.555556	0.00361582	0.00831463	1	0.392316	1.12971	219700	0.011778	0		0.998017	0.98079	0.000695159	0.000719444	0.000696211	00:00:00	245936	2022-07-15			3.32292e+08	2021-07-19	0	0.9
2021-05-17	1.34788e+07	0		0	0.4	110746	296843	2.02181e+08	16869.3	2.5		0	2021-05-17	0.608435		1	0.00592895	0.0133996	0.555556	0.00322891	0.00793632	1	0.391565	1.12971	220000	0.011778	0		0.998084	0.978911	0.000693879	0.000717618	0.000694921	00:00:00	246144	2022-07-15			3.32297e+08	2021-07-19	0	0.9
2021-05-18	1.3495e+07	0		0	0.4	106920	287275	2.02425e+08	16261.6	2.5		0	2021-05-18	0.609159		1	0.00571629	0.0129675	0.555556	0.00287971	0.0075675	1	0.390841	1.12971	220300	0.011778	0		0.998151	0.977101	0.000692601	0.000715797	0.000693634	00:00:00	246345	2022-07-15			3.32303e+08	2021-07-19	0	0.9
2021-05-19	1.35107e+07	0		0	0.4	103184	277781	2.0266e+08	15670.7	2.5		0	2021-05-19	0.609857		1	0.00550906	0.0125387	0.555556	0.00256656	0.00721144	1	0.390143	1.12971	220600	0.011778	0		0.998216	0.975358	0.000691326	0.000713981	0.000692349	00:00:00	246539	2022-07-15			3.32308e+08	2021-07-19	0	0.9
2021-05-20	1.35258e+07	0		0	0.4	99514.8	268500	2.02887e+08	15096.2	2.5		0	2021-05-20	0.610528		1	0.00530595	0.0121196	0.555556	0.00228801	0.00687164	1	0.389472	1.12971	220900	0.011778	0		0.998279	0.973679	0.000690053	0.000712171	0.000691068	00:00:00	246726	2022-07-15			3.32314e+08	2021-07-19	0	0.9
2021-05-21	1.35403e+07	0		0	0.4	95923.8	259583	2.03105e+08	14534.3	2.5		0	2021-05-21	0.611174		1	0.00510755	0.0117169	0.555556	0.0020427	0.00655174	1	0.388826	1.12971	221200	0.011778	0		0.998341	0.972064	0.000688784	0.000710367	0.00068979	00:00:00	246906	2022-07-15			3.32319e+08	2021-07-19	0	0.9
2021-05-22	1.35543e+07	0		0	0.4	92418.7	250741	2.03315e+08	13986.6	2.5		0	2021-05-22	0.611795		1	0.00491425	0.0113176	0.555556	0.00182226	0.00624255	1	0.388205	1.12971	221500	0.011778	0		0.998402	0.970511	0.000687518	0.000708567	0.000688514	00:00:00	247079	2022-07-15			3.32324e+08	2021-07-19	0	0.9
2021-05-23	1.35678e+07	0		0	0.4	89003.5	242024	2.03516e+08	13454	2.5		0	2021-05-23	0.612393		1	0.00472625	0.010924	0.555556	0.00162476	0.00594497	1	0.387607	1.12971	221800	0.011778	0		0.998462	0.969018	0.000686254	0.000706773	0.000687242	00:00:00	247245	2022-07-15			3.3233e+08	2021-07-19	0	0.9
2021-05-24	1.35807e+07	0		0	0.4	85678.8	233474	2.0371e+08	12936.9	2.5		0	2021-05-24	0.612967		1	0.00454355	0.0105379	0.555556	0.00144831	0.00565966	1	0.387033	1.12971	222100	0.011778	0		0.99852	0.967584	0.000684993	0.000704984	0.000685972	00:00:00	247405	2022-07-15			3.32335e+08	2021-07-19	0	0.9
2021-05-25	1.35931e+07	0		0	0.4	82443.2	225122	2.03897e+08	12435.2	2.5		0	2021-05-25	0.613518		1	0.00436608	0.0101607	0.555556	0.001291	0.0053869	1	0.386482	1.12971	222400	0.011778	0		0.998576	0.966206	0.000683735	0.0007032	0.000684705	00:00:00	247559	2022-07-15			3.32341e+08	2021-07-19	0	0.9
2021-05-26	1.36051e+07	0		0	0.4	79295.6	216982	2.04076e+08	11948.6	2.5		0	2021-05-26	0.614047		1	0.00419373	0.0097932	0.555556	0.00115094	0.00512658	1	0.385953	1.12971	222700	0.011778	0		0.998631	0.964883	0.000682479	0.000701421	0.000683441	00:00:00	247706	2022-07-15			3.32346e+08	2021-07-19	0	0.9
2021-05-27	1.36166e+07	0		0	0.4	76238	209052	2.04248e+08	11476.6	2.5		0	2021-05-27	0.614555		1	0.00402659	0.00943514	0.555556	0.00102617	0.00487808	1	0.385445	1.12971	223000	0.011778	0		0.998684	0.963613	0.000681227	0.000699648	0.000682179	00:00:00	247848	2022-07-15			3.32352e+08	2021-07-19	0	0.9
2021-05-28	1.36276e+07	0		0	0.4	73270.9	201307	2.04414e+08	11019.6	2.5		0	2021-05-28	0.615042		1	0.00386468	0.0090854	0.555556	0.000914706	0.00464021	1	0.384958	1.12971	223300	0.011778	0		0.998736	0.962395	0.000679977	0.00069788	0.000680921	00:00:00	247985	2022-07-15			3.32357e+08	2021-07-19	0	0.9
2021-05-29	1.36382e+07	0		0	0.4	70394.2	193759	2.04572e+08	10577.3	2.5		0	2021-05-29	0.615509		1	0.00370797	0.00874461	0.555556	0.000815245	0.00441287	1	0.384491	1.12971	223600	0.011778	0		0.998786	0.961227	0.00067873	0.000696117	0.000679665	00:00:00	248115	2022-07-15			3.32363e+08	2021-07-19	0	0.9
2021-05-30	1.36483e+07	0		0	0.4	67607.1	186417	2.04725e+08	10149.7	2.5		0	2021-05-30	0.615957		1	0.00355639	0.00841311	0.555556	0.000726574	0.00419587	1	0.384043	1.12971	223900	0.011778	0		0.998835	0.960107	0.000677486	0.000694359	0.000678412	00:00:00	248241	2022-07-15			3.32368e+08	2021-07-19	0	0.9
2021-05-31	1.3658e+07	0		0	0.4	64908.4	179284	2.04871e+08	9736.5	2.5		0	2021-05-31	0.616386		1	0.00340986	0.00809107	0.555556	0.000647553	0.00398888	1	0.383614	1.12971	224200	0.011778	0		0.998882	0.959034	0.000676245	0.000692606	0.000677162	00:00:00	248361	2022-07-15			3.32374e+08	2021-07-19	0	0.9
2021-06-01	1.36663e+07	0		0	0.4	61259.7	171322	2.04995e+08	8299.91	2.5		0	2021-06-01	0.616751		1	0.00321388	0.00773163	0.5	0.000575183	0.00377037	1	0.383249	1.12971	224500	0.011778	0		0.99905	0.958123	0.000675006	0.000690858	0.000675915	00:00:00	248464	2022-07-15			3.32379e+08	2021-07-19	0	0.8
2021-06-02	1.36742e+07	0		0	0.4	57609	163477	2.05112e+08	7825.91	2.5		0	2021-06-02	0.617094		1	0.00301832	0.00737748	0.5	0.000510479	0.0035595	1	0.382906	1.12971	224800	0.011778	0		0.999105	0.957265	0.00067377	0.000689115	0.00067467	00:00:00	248561	2022-07-15			3.32385e+08	2021-07-19	0	0.8
2021-06-03	1.36815e+07	0		0	0.4	53942.3	155734	2.05223e+08	7352.94	2.5		0	2021-06-03	0.617416		1	0.00282244	0.00702793	0.5	0.000452577	0.00335562	1	0.382584	1.12971	225100	0.011778	0		0.99916	0.956461	0.000672537	0.000687378	0.000673428	00:00:00	248652	2022-07-15			3.3239e+08	2021-07-19	0	0.8
2021-06-04	1.36884e+07	0		0	0.4	50244.2	148079	2.05326e+08	6879.16	2.5		0	2021-06-04	0.617716		1	0.00262544	0.00668236	0.5	0.000400739	0.00315815	1	0.382284	1.12971	225400	0.011778	0		0.999215	0.95571	0.000671306	0.000685645	0.000672189	00:00:00	248737	2022-07-15			3.32395e+08	2021-07-19	0	0.8
2021-06-05	1.36948e+07	0		0	0.4	46496.9	140495	2.05422e+08	6402.51	2.5		0	2021-06-05	0.617995		1	0.00242641	0.00634001	0.5	0.000354292	0.00296648	1	0.382005	1.12971	225700	0.011778	0		0.999271	0.955013	0.000670078	0.000683917	0.000670953	00:00:00	248816	2022-07-15			3.32401e+08	2021-07-19	0	0.8
2021-06-06	1.37007e+07	0		0	0.4	42681.1	132962	2.05511e+08	5920.69	2.5		0	2021-06-06	0.618252		1	0.00222433	0.00599996	0.5	0.000312628	0.00277993	1	0.381748	1.12971	226000	0.011778	0		0.999327	0.954371	0.000668853	0.000682195	0.000669719	00:00:00	248889	2022-07-15			3.32406e+08	2021-07-19	0	0.8
2021-06-07	1.37062e+07	0		0	0.4	39812.4	125456	2.05592e+08	5431.15	2.5		0	2021-06-07	0.618487		1	0.00207207	0.00566116	0.5	0.000275197	0.00259781	1	0.381513	1.12971	226300	0.011778	0		0.999385	0.953783	0.000667631	0.000680477	0.000668488	00:00:00	248956	2022-07-15			3.32412e+08	2021-07-19	0	0.8
2021-06-08	1.37112e+07	0		0	0.4	37049.4	118084	2.05668e+08	5062.98	2.5		0	2021-06-08	0.618705		1	0.00192572	0.00532841	0.5	0.000241697	0.00242197	1	0.381295	1.12971	226600	0.011778	0		0.999428	0.953238	0.000666411	0.000678764	0.00066726	00:00:00	249019	2022-07-15			3.32417e+08	2021-07-19	0	0.8
2021-06-09	1.37159e+07	0		0	0.4	34405.4	110844	2.05739e+08	4708.92	2.5		0	2021-06-09	0.618907		1	0.00178593	0.00500164	0.5	0.000211705	0.00225213	1	0.381093	1.12971	226900	0.011778	0		0.999469	0.952732	0.000665194	0.000677057	0.000666035	00:00:00	249077	2022-07-15			3.32423e+08	2021-07-19	0	0.8
2021-06-10	1.37203e+07	0		0	0.4	31896.8	103738	2.05804e+08	4370.55	2.5		0	2021-06-10	0.619094		1	0.00165352	0.00468091	0.5	0.00018485	0.00208811	1	0.380906	1.12971	227200	0.011778	0		0.999509	0.952264	0.00066398	0.000675354	0.000664812	00:00:00	249131	2022-07-15			3.32428e+08	2021-07-19	0	0.8
2021-06-11	1.37243e+07	0		0	0.4	29544.2	96768.2	2.05865e+08	4049.89	2.5		0	2021-06-11	0.619267		1	0.00152954	0.00436635	0.5	0.000160801	0.00192972	1	0.380733	1.12971	227500	0.011778	0		0.999547	0.951833	0.000662768	0.000673656	0.000663592	00:00:00	249181	2022-07-15			3.32434e+08	2021-07-19	0	0.8
2021-06-12	1.37281e+07	0		0	0.4	27373	89940.3	2.05921e+08	3749.49	2.5		0	2021-06-12	0.619426		1	0.00141527	0.0040582	0.5	0.000139264	0.00177687	1	0.380574	1.12971	227800	0.011778	0		0.999582	0.951435	0.000661559	0.000671963	0.000662375	00:00:00	249228	2022-07-15			3.32439e+08	2021-07-19	0	0.8
2021-06-13	1.37316e+07	0		0	0.4	25414.3	83263.1	2.05974e+08	3472.48	2.5		0	2021-06-13	0.619572		1	0.00131227	0.00375686	0.5	0.000119981	0.00162953	1	0.380428	1.12971	228100	0.011778	0		0.999615	0.951069	0.000660353	0.000670275	0.00066116	00:00:00	249271	2022-07-15			3.32445e+08	2021-07-19	0	0.8
2021-06-14	1.37348e+07	0		0	0.4	23574.1	76749.4	2.06022e+08	3222.77	2.5		0	2021-06-14	0.619708		1	0.00121565	0.0034629	0.5	0.000102728	0.00148777	1	0.380292	1.12971	228400	0.011778	0		0.999645	0.950731	0.000659149	0.000668591	0.000659948	00:00:00	249311	2022-07-15			3.3245e+08	2021-07-19	0	0.8
2021-06-15	1.37378e+07	0		0	0.4	21853.5	71437.8	2.06067e+08	2988.35	2.5		0	2021-06-15	0.619832		1	0.00112545	0.00322319	0.5	8.92395e-05	0.00137253	1	0.380168	1.12971	228700	0.011778	0		0.999672	0.95042	0.000657948	0.000666913	0.000658739	00:00:00	249347	2022-07-15			3.32456e+08	2021-07-19	0	0.8
2021-06-16	1.37405e+07	0		0	0.4	20252.3	66381.2	2.06108e+08	2769.34	2.5		0	2021-06-16	0.619947		1	0.00104162	0.00299499	0.5	7.73528e-05	0.00126408	1	0.380053	1.12971	229000	0.011778	0		0.999698	0.950133	0.000656749	0.000665239	0.000657532	00:00:00	249382	2022-07-15			3.32461e+08	2021-07-19	0	0.8
2021-06-17	1.37431e+07	0		0	0.4	18768.1	61594	2.06147e+08	2565.65	2.5		0	2021-06-17	0.620053		1	0.000964022	0.00277895	0.5	6.6919e-05	0.00116253	1	0.379947	1.12971	229300	0.011778	0		0.999722	0.949869	0.000655554	0.000663571	0.000656328	00:00:00	249413	2022-07-15			3.32467e+08	2021-07-19	0	0.8
2021-06-18	1.37455e+07	0		0	0.4	17395.6	57091.8	2.06182e+08	2376.96	2.5		0	2021-06-18	0.62015		1	0.000892355	0.00257578	0.5	5.78068e-05	0.00106804	1	0.37985	1.12971	229600	0.011778	0		0.999745	0.949626	0.00065436	0.000661907	0.000655127	00:00:00	249443	2022-07-15			3.32472e+08	2021-07-19	0	0.8
2021-06-19	1.37477e+07	0		0	0.4	16125.6	52891.8	2.06215e+08	2202.57	2.5		0	2021-06-19	0.620239		1	0.000826131	0.00238626	0.5	4.99006e-05	0.000980771	1	0.379761	1.12971	229900	0.011778	0		0.999765	0.949403	0.00065317	0.000660247	0.000653928	00:00:00	249470	2022-07-15			3.32477e+08	2021-07-19	0	0.8
2021-06-20	1.37497e+07	0		0	0.4	14944.2	49012.4	2.06246e+08	2041.3	2.5		0	2021-06-20	0.620321		1	0.000764606	0.0022112	0.5	4.30985e-05	0.000900926	1	0.379679	1.12971	230200	0.011778	0		0.999784	0.949198	0.000651982	0.000658593	0.000652732	00:00:00	249495	2022-07-15			3.32483e+08	2021-07-19	0	0.8
2021-06-21	1.37516e+07	0		0	0.4	13847.2	45472.6	2.06274e+08	1891.33	2.5		0	2021-06-21	0.620396		1	0.000707555	0.00205147	0.5	3.73107e-05	0.000828727	1	0.379604	1.12971	230500	0.011778	0		0.999802	0.949011	0.000650797	0.000656943	0.000651539	00:00:00	249519	2022-07-15			3.32488e+08	2021-07-19	0	0.8
2021-06-22	1.37534e+07	0		0	0.4	12830	42161.8	2.06301e+08	1752.15	2.5		0	2021-06-22	0.620465		1	0.000654727	0.00190207	0.5	3.22703e-05	0.000761845	1	0.379535	1.12971	230800	0.011778	0		0.999819	0.948838	0.000649614	0.000655298	0.000650348	00:00:00	249540	2022-07-15			3.32494e+08	2021-07-19	0	0.8
2021-06-23	1.3755e+07	0		0	0.4	11887.4	39076	2.06325e+08	1623.14	2.5		0	2021-06-23	0.620528		1	0.000605842	0.00176283	0.5	2.78943e-05	0.000700093	1	0.379472	1.12971	231100	0.011778	0		0.999834	0.948681	0.000648433	0.000653658	0.00064916	00:00:00	249560	2022-07-15			3.32499e+08	2021-07-19	0	0.8
2021-06-24	1.37565e+07	0		0	0.4	11014.1	36209.1	2.06348e+08	1503.65	2.5		0	2021-06-24	0.620585		1	0.000560607	0.00163347	0.5	2.41063e-05	0.000643249	1	0.379415	1.12971	231400	0.011778	0		0.999848	0.948537	0.000647256	0.000652022	0.000647974	00:00:00	249579	2022-07-15			3.32505e+08	2021-07-19	0	0.8
2021-06-25	1.37579e+07	0		0	0.4	10204.5	33552.2	2.06368e+08	1392.98	2.5		0	2021-06-25	0.620638		1	0.000518727	0.00151358	0.5	2.0835e-05	0.000591045	1	0.379362	1.12971	231700	0.011778	0		0.999861	0.948405	0.000646081	0.000650391	0.000646791	00:00:00	249596	2022-07-15			3.3251e+08	2021-07-19	0	0.8
2021-06-26	1.37592e+07	0		0	0.4	9453.65	31093.1	2.06388e+08	1290.41	2.5		0	2021-06-26	0.620686		1	0.000479935	0.00140263	0.5	1.80135e-05	0.000543162	1	0.379314	1.12971	232000	0.011778	0		0.999873	0.948285	0.000644908	0.000648765	0.000645611	00:00:00	249612	2022-07-15			3.32516e+08	2021-07-19	0	0.8
2021-06-27	1.37604e+07	0		0	0.4	8757.62	28815.9	2.06406e+08	1195.3	2.5		0	2021-06-27	0.62073		1	0.000444026	0.00129988	0.5	1.55783e-05	0.000499214	1	0.37927	1.12971	232300	0.011778	0		0.999885	0.948176	0.000643738	0.000647143	0.000644433	00:00:00	249627	2022-07-15			3.32521e+08	2021-07-19	0	0.8
2021-06-28	1.37615e+07	0		0	0.4	8112.65	26700.3	2.06422e+08	1107.17	2.5		0	2021-06-28	0.620769		1	0.000410794	0.00120443	0.5	1.34686e-05	0.000458744	1	0.379231	1.12971	232600	0.011778	0		0.999895	0.948077	0.000642571	0.000645526	0.000643258	00:00:00	249641	2022-07-15			3.32527e+08	2021-07-19	0	0.8
2021-06-29	1.37625e+07	0		0	0.4	7515.03	24737.5	2.06438e+08	1025.52	2.5		0	2021-06-29	0.620805		1	0.000380042	0.00111587	0.5	1.16432e-05	0.000421524	1	0.379195	1.12971	232900	0.011778	0		0.999905	0.947986	0.000641406	0.000643914	0.000642085	00:00:00	249653	2022-07-15			3.32532e+08	2021-07-19	0	0.8
2021-06-30	1.37635e+07	0		0	0.4	6961.26	22918	2.06452e+08	949.886	2.5		0	2021-06-30	0.620838		1	0.000351585	0.00103378	0.5	1.00655e-05	0.000387322	1	0.379162	1.12971	233200	0.011778	0		0.999914	0.947905	0.000640244	0.000642306	0.000640915	00:00:00	249665	2022-07-15			3.32538e+08	2021-07-19	0	0.8
2021-07-01	1.37643e+07	0		0	0.4	6448.1	21232.2	2.06465e+08	879.815	2.5		0	2021-07-01	0.620868		1	0.000325249	0.000957718	0.5	8.70227e-06	0.000355904	1	0.379132	1.12971	233500	0.011778	0		0.999922	0.947831	0.000639084	0.000640702	0.000639747	00:00:00	249676	2022-07-15			3.32543e+08	2021-07-19	0	0.8
2021-07-02	1.37652e+07	0		0	0.4	5972.59	19670.1	2.06477e+08	814.894	2.5		0	2021-07-02	0.620894		1	0.000300877	0.000887244	0.5	7.52426e-06	0.000327041	1	0.379106	1.12971	233800	0.011778	0		0.99993	0.947765	0.000637926	0.000639104	0.000638582	00:00:00	249686	2022-07-15			3.32549e+08	2021-07-19	0	0.8
2021-07-03	1.37659e+07	0		0	0.4	5532.03	18222.3	2.06489e+08	754.748	2.5		0	2021-07-03	0.620918		1	0.000278326	0.000821925	0.5	6.50579e-06	0.000300516	1	0.379082	1.12971	234100	0.011778	0		0.999937	0.947705	0.000636772	0.00063751	0.00063742	00:00:00	249695	2022-07-15			3.32554e+08	2021-07-19	0	0.8
2021-07-04	1.37666e+07	0		0	0.4	5123.89	16880	2.06499e+08	699.031	2.5		0	2021-07-04	0.620939		1	0.000257462	0.000761368	0.5	5.62484e-06	0.000276132	1	0.379061	1.12971	234400	0.011778	0		0.999944	0.947652	0.000635619	0.00063592	0.00063626	00:00:00	249704	2022-07-15			3.32559e+08	2021-07-19	0	0.8
2021-07-05	1.37673e+07	0		0	0.4	4745.8	15636.1	2.06509e+08	647.422	2.5		0	2021-07-05	0.620958		1	0.000238159	0.000705251	0.5	4.86317e-06	0.000253723	1	0.379042	1.12971	234700	0.011778	0		0.99995	0.947604	0.000634469	0.000634335	0.000635103	00:00:00	249712	2022-07-15			3.32565e+08	2021-07-19	0	0.8
2021-07-06	1.37679e+07	0		0	0.4	4395.53	14483.6	2.06518e+08	599.618	2.5		0	2021-07-06	0.620975		1	0.0002203	0.000653256	0.5	4.20477e-06	0.000233134	1	0.379025	1.12971	235000	0.011778	0		0.999956	0.947562	0.000633322	0.000632754	0.000633948	00:00:00	249720	2022-07-15			3.3257e+08	2021-07-19	0	0.8
2021-07-07	1.37684e+07	0		0	0.4	4071.05	13415.8	2.06526e+08	555.338	2.5		0	2021-07-07	0.62099		1	0.000203777	0.000605085	0.5	3.63561e-06	0.000214217	1	0.37901	1.12971	235300	0.011778	0		0.999961	0.947525	0.000632177	0.000631178	0.000632795	00:00:00	249726	2022-07-15			3.32576e+08	2021-07-19	0	0.8
2021-07-08	1.37689e+07	0		0	0.4	3770.48	12426.4	2.06534e+08	514.323	2.5		0	2021-07-08	0.621003		1	0.000188492	0.000560455	0.5	3.14356e-06	0.000196834	1	0.378997	1.12971	235600	0.011778	0		0.999966	0.947493	0.000631035	0.000629606	0.000631645	00:00:00	249733	2022-07-15			3.32581e+08	2021-07-19	0	0.8
2021-07-09	1.37694e+07	0		0	0.4	3492.07	11509.8	2.06541e+08	476.334	2.5		0	2021-07-09	0.621014		1	0.000174351	0.000519104	0.5	2.7181e-06	0.000180861	1	0.378986	1.12971	235900	0.011778	0		0.99997	0.947465	0.000629895	0.000628039	0.000630498	00:00:00	249739	2022-07-15			3.32587e+08	2021-07-19	0	0.8
2021-07-10	1.37698e+07	0		0	0.4	3234.18	10660.5	2.06548e+08	441.148	2.5		0	2021-07-10	0.621024		1	0.000161271	0.000480794	0.5	2.35022e-06	0.000166183	1	0.378976	1.12971	236200	0.011778	0		0.999974	0.94744	0.000628758	0.000626476	0.000629353	00:00:00	249744	2022-07-15			3.32592e+08	2021-07-19	0	0.8
2021-07-11	1.37703e+07	0		0	0.4	2995.32	9873.81	2.06554e+08	408.56	2.5		0	2021-07-11	0.621032		1	0.000149171	0.000445304	0.5	2.03216e-06	0.000152696	1	0.378968	1.12971	236500	0.011778	0		0.999978	0.94742	0.000627623	0.000624918	0.000628211	00:00:00	249749	2022-07-15			3.32598e+08	2021-07-19	0	0.8
2021-07-12	1.37706e+07	0		0	0.4	2774.08	9145.02	2.0656e+08	378.377	2.5		0	2021-07-12	0.621039		1	0.000137977	0.000412429	0.5	1.75717e-06	0.000140304	1	0.378961	1.12971	236800	0.011778	0		0.999982	0.947403	0.00062649	0.000623364	0.000627071	00:00:00	249754	2022-07-15			3.32603e+08	2021-07-19	0	0.8
2021-07-13	1.3771e+07	0		0	0.4	2569.16	8469.92	2.06565e+08	350.423	2.5		0	2021-07-13	0.621045		1	0.000127624	0.000381977	0.5	1.51942e-06	0.000128917	1	0.378955	1.12971	237100	0.011778	0		0.999985	0.947389	0.00062536	0.000621814	0.000625933	00:00:00	249758	2022-07-15			3.32609e+08	2021-07-19	0	0.8
2021-07-14	1.37713e+07	0		0	0.4	2379.37	7844.56	2.0657e+08	324.533	2.5		0	2021-07-14	0.621049		1	0.000118046	0.000353769	0.5	1.31384e-06	0.000118455	1	0.378951	1.12971	237400	0.011778	0		0.999988	0.947378	0.000624232	0.000620269	0.000624798	00:00:00	249762	2022-07-15			3.32614e+08	2021-07-19	0	0.8
2021-07-15	1.37716e+07	0		0	0.4	2203.6	7265.3	2.06574e+08	300.555	2.5		0	2021-07-15	0.621052		1	0.000109188	0.00032764	0.5	1.13609e-06	0.000108842	1	0.378948	1.12971	237700	0.011778	0		0.999991	0.947369	0.000623107	0.000618728	0.000623665	00:00:00	249766	2022-07-15			3.3262e+08	2021-07-19	0	0.8
2021-07-16	1.37719e+07	0		0	0.4	2040.8	6728.76	2.06578e+08	278.349	2.5		0	2021-07-16	0.621055		1	0.000100994	0.000303439	0.5	9.82403e-07	0.000100009	1	0.378945	1.12971	238000	0.011778	0		0.999994	0.947363	0.000621984	0.000617192	0.000622535	00:00:00	249769	2022-07-15			3.32625e+08	2021-07-19	0	0.8
2021-07-17	1.37721e+07	0		0	0.4	1890.02	6231.8	2.06582e+08	257.783	2.5		0	2021-07-17	0.621056		1	9.34143e-05	0.000281023	0.5	8.49513e-07	9.18936e-05	1	0.378944	1.12971	238300	0.011778	0		0.999996	0.94736	0.000620864	0.00061566	0.000621408	00:00:00	249773	2022-07-15			3.32631e+08	2021-07-19	0	0.8
2021-07-18	1.37724e+07	0		0	0.4	1750.38	5771.5	2.06586e+08	238.737	2.5		0	2021-07-18	0.621057		1	8.64039e-05	0.000260262	0.5	7.34609e-07	8.44366e-05	1	0.378943	1.12971	238600	0.011778	0		0.999999	0.947358	0.000619746	0.000614132	0.000620282	00:00:00	249775	2022-07-15			3.32636e+08	2021-07-19	0	0.8
2021-07-19	1.37726e+07	0		0	0.4	1621.06	5345.18	2.06589e+08	221.098	2.5		0	2021-07-19	0.621056		1	7.99195e-05	0.000241033	0.5	6.35254e-07	7.7585e-05	1	0.378944	1.12971	238900	0.011778	0		1	0.947359	0.00061863	0.000612608	0.000619159	00:00:00	249778	2022-07-15			3.32641e+08	2021-07-19	0	0.8
2021-07-20	1.37728e+07	0		0	0.4	1501.29	4950.32	2.06592e+08	204.763	2.5		0	2021-07-20	0.621055		1	7.3922e-05	0.000223224	0.5	5.49342e-07	7.12896e-05	1	0.378945	1.12971	239200	0.011778	0		1	0.947361	0.000617517	0.000611089	0.000618039	00:00:00	249781	2022-07-15			3.32647e+08	2021-07-20	0	0.8
2021-07-21	1.3773e+07	0		0	0.4	1390.37	4584.62	2.06595e+08	189.635	2.5		0	2021-07-21	0.621054		1	6.83746e-05	0.00020673	0.5	4.75054e-07	6.55052e-05	1	0.378946	1.12971	239500	0.011778	0		1	0.947366	0.000616406	0.000609574	0.000616921	00:00:00	249783	2022-07-15			3.32652e+08	2021-07-21	0	0.8
2021-07-22	1.37732e+07	0		0	0.4	1287.64	4245.92	2.06598e+08	175.625	2.5		0	2021-07-22	0.621051		1	6.32436e-05	0.000191454	0.5	4.10817e-07	6.01903e-05	1	0.378949	1.12971	239800	0.011778	0		1.00001	0.947371	0.000615298	0.000608063	0.000615805	00:00:00	249785	2022-07-15			3.32658e+08	2021-07-22	0	0.8
2021-07-23	1.37733e+07	0		0	0.4	1192.51	3932.24	2.066e+08	162.65	2.5		0	2021-07-23	0.621049		1	5.84979e-05	0.000177307	0.5	3.5527e-07	5.53069e-05	1	0.378951	1.12971	240100	0.011778	0		1.00001	0.947378	0.000614191	0.000606557	0.000614692	00:00:00	249787	2022-07-15			3.32663e+08	2021-07-23	0	0.8
2021-07-24	1.37735e+07	0		0	0.4	1104.4	3641.72	2.06602e+08	150.634	2.5		0	2021-07-24	0.621045		1	5.41084e-05	0.000164205	0.5	3.07238e-07	5.082e-05	1	0.378955	1.12971	240400	0.011778	0		1.00001	0.947387	0.000613088	0.000605054	0.000613581	00:00:00	249789	2022-07-15			3.32669e+08	2021-07-24	0	0.8
2021-07-25	1.37736e+07	0		0	0.4	1022.81	3372.67	2.06604e+08	139.507	2.5		0	2021-07-25	0.621041		1	5.00485e-05	0.000152071	0.5	2.65702e-07	4.66972e-05	1	0.378959	1.12971	240700	0.011778	0		1.00001	0.947397	0.000611986	0.000603556	0.000612473	00:00:00	249791	2022-07-15			3.32674e+08	2021-07-25	0	0.8
2021-07-26	1.37738e+07	0		0	0.4	947.251	3123.49	2.06606e+08	129.201	2.5		0	2021-07-26	0.621037		1	4.62934e-05	0.000140833	0.5	2.29784e-07	4.29091e-05	1	0.378963	1.12971	241000	0.011778	0		1.00001	0.947408	0.000610887	0.000602062	0.000611367	00:00:00	249792	2022-07-15			3.3268e+08	2021-07-26	0	0.8
2021-07-27	1.37739e+07	0		0	0.4	877.274	2892.73	2.06608e+08	119.658	2.5		0	2021-07-27	0.621032		1	4.28202e-05	0.000130426	0.5	1.98724e-07	3.94284e-05	1	0.378968	1.12971	241300	0.011778	0		1.00001	0.94742	0.000609791	0.000600573	0.000610263	00:00:00	249794	2022-07-15			3.32685e+08	2021-07-27	0	0.8
2021-07-28	1.3774e+07	0		0	0.4	812.469	2679.02	2.0661e+08	110.82	2.5		0	2021-07-28	0.621027		1	3.96078e-05	0.000120789	0.5	1.71864e-07	3.62303e-05	1	0.378973	1.12971	241600	0.011778	0		1.00001	0.947433	0.000608696	0.000599087	0.000609162	00:00:00	249795	2022-07-15			3.32691e+08	2021-07-28	0	0.8
2021-07-29	1.37741e+07	0		0	0.4	752.454	2481.09	2.06611e+08	102.635	2.5		0	2021-07-29	0.621021		1	3.66366e-05	0.000111863	0.5	1.48636e-07	3.32918e-05	1	0.378979	1.12971	241900	0.011778	0		1.00001	0.947447	0.000607604	0.000597606	0.000608063	00:00:00	249797	2022-07-15			3.32696e+08	2021-07-29	0	0.8
2021-07-30	1.37742e+07	0		0	0.4	696.875	2297.8	2.06613e+08	95.0547	2.5		0	2021-07-30	0.621015		1	3.38884e-05	0.000103597	0.5	1.28549e-07	3.05917e-05	1	0.378985	1.12971	242200	0.011778	0		1.00002	0.947462	0.000606515	0.000596128	0.000606966	00:00:00	249798	2022-07-15			3.32702e+08	2021-07-30	0	0.8
2021-07-31	1.37743e+07	0		0	0.4	645.403	2128.05	2.06614e+08	88.0349	2.5		0	2021-07-31	0.621009		1	3.13466e-05	9.59426e-05	0.5	1.11178e-07	2.81108e-05	1	0.378991	1.12971	242500	0.011778	0		1.00002	0.947477	0.000605427	0.000594655	0.000605872	00:00:00	249799	2022-07-15			3.32707e+08	2021-07-31	0	0.8
2021-08-01	1.37744e+07	0		0	0.4	597.736	1970.85	2.06615e+08	81.534	2.5		0	2021-08-01	0.621003		1	2.89956e-05	8.88537e-05	0.5	9.61553e-08	2.58312e-05	1	0.378997	1.12971	242800	0.011778	0		1.00002	0.947494	0.000604342	0.000593186	0.00060478	00:00:00	249800	2022-07-15			3.32713e+08	2021-08-01	0	0.8
2021-08-02	1.37744e+07	0		0	0.4	553.591	1825.26	2.06616e+08	75.5134	2.5		0	2021-08-02	0.620996		1	2.6821e-05	8.22888e-05	0.5	8.31635e-08	2.37366e-05	1	0.379004	1.12971	243100	0.011778	0		1.00002	0.947511	0.00060326	0.000591721	0.000603691	00:00:00	249801	2022-07-15			3.32718e+08	2021-08-02	0	0.8
2021-08-03	1.37745e+07	0		0	0.4	512.71	1690.44	2.06618e+08	69.9378	2.5		0	2021-08-03	0.620989		1	2.48097e-05	7.62092e-05	0.5	7.19279e-08	2.18119e-05	1	0.379011	1.12971	243400	0.011778	0		1.00002	0.947528	0.000602179	0.000590261	0.000602603	00:00:00	249802	2022-07-15			3.32723e+08	2021-08-03	0	0.8
2021-08-04	1.37746e+07	0		0	0.4	474.849	1565.58	2.06619e+08	64.7742	2.5		0	2021-08-04	0.620981		1	2.29494e-05	7.0579e-05	0.5	6.22109e-08	2.00435e-05	1	0.379019	1.12971	243700	0.011778	0		1.00002	0.947546	0.000601101	0.000588804	0.000601519	00:00:00	249802	2022-07-15			3.32729e+08	2021-08-04	0	0.8
2021-08-05	1.37746e+07	0		0	0.4	439.787	1449.95	2.06619e+08	59.9922	2.5		0	2021-08-05	0.620974		1	2.12287e-05	6.5365e-05	0.5	5.38072e-08	1.84185e-05	1	0.379026	1.12971	244000	0.011778	0		1.00002	0.947565	0.000600025	0.000587351	0.000600436	00:00:00	249803	2022-07-15			3.32734e+08	2021-08-05	0	0.8
2021-08-06	1.37747e+07	0		0	0.4	407.315	1342.86	2.0662e+08	55.5635	2.5		0	2021-08-06	0.620966		1	1.96371e-05	6.05364e-05	0.5	4.65393e-08	1.69253e-05	1	0.379034	1.12971	244300	0.011778	0		1.00002	0.947584	0.000598952	0.000585903	0.000599356	00:00:00	249804	2022-07-15			3.3274e+08	2021-08-06	0	0.8
2021-08-07	1.37747e+07	0		0	0.4	377.243	1243.69	2.06621e+08	51.4621	2.5		0	2021-08-07	0.620958		1	1.8165e-05	5.60648e-05	0.5	4.02535e-08	1.55533e-05	1	0.379042	1.12971	244600	0.011778	0		1.00002	0.947604	0.000597881	0.000584458	0.000598278	00:00:00	249805	2022-07-15			3.32745e+08	2021-08-07	0	0.8
2021-08-08	1.37748e+07	0		0	0.4	349.393	1151.84	2.06622e+08	47.6636	2.5		0	2021-08-08	0.62095		1	1.68034e-05	5.19237e-05	0.5	3.48171e-08	1.42926e-05	1	0.37905	1.12971	244900	0.011778	0		1.00002	0.947624	0.000596812	0.000583017	0.000597202	00:00:00	249805	2022-07-15			3.32751e+08	2021-08-08	0	0.8
2021-08-09	1.37748e+07	0		0	0.4	323.602	1066.79	2.06622e+08	44.1458	2.5		0	2021-08-09	0.620942		1	1.55439e-05	4.80887e-05	0.5	3.01153e-08	1.31342e-05	1	0.379058	1.12971	245200	0.011778	0		1.00002	0.947645	0.000595745	0.000581581	0.000596129	00:00:00	249806	2022-07-15			3.32756e+08	2021-08-09	0	0.8
2021-08-10	1.37749e+07	0		0	0.4	299.715	988.019	2.06623e+08	40.8879	2.5		0	2021-08-10	0.620934		1	1.4379e-05	4.45372e-05	0.5	2.60487e-08	1.20697e-05	1	0.379066	1.12971	245500	0.011778	0		1.00002	0.947666	0.00059468	0.000580148	0.000595057	00:00:00	249806	2022-07-15			3.32762e+08	2021-08-10	0	0.8
2021-08-11	1.37749e+07	0		0	0.4	277.594	915.07	2.06624e+08	37.8706	2.5		0	2021-08-11	0.620925		1	1.33014e-05	4.12482e-05	0.5	2.25315e-08	1.10916e-05	1	0.379075	1.12971	245800	0.011778	0		1.00002	0.947687	0.000593618	0.00057872	0.000593989	00:00:00	249807	2022-07-15			3.32767e+08	2021-08-11	0	0.8
2021-08-12	1.37749e+07	0		0	0.4	257.106	847.511	2.06624e+08	35.0762	2.5		0	2021-08-12	0.620917		1	1.23047e-05	3.82023e-05	0.5	1.94894e-08	1.01928e-05	1	0.379083	1.12971	246100	0.011778	0		1.00002	0.947709	0.000592558	0.000577295	0.000592922	00:00:00	249807	2022-07-15			3.32773e+08	2021-08-12	0	0.8
2021-08-13	1.3775e+07	0		0	0.4	238.133	784.945	2.06625e+08	32.4883	2.5		0	2021-08-13	0.620908		1	1.13828e-05	3.53814e-05	0.5	1.68582e-08	9.36687e-06	1	0.379092	1.12971	246400	0.011778	0		1.00002	0.94773	0.000591501	0.000575874	0.000591858	00:00:00	249807	2022-07-15			3.32778e+08	2021-08-13	0	0.8
2021-08-14	1.3775e+07	0		0	0.4	220.56	727.001	2.06625e+08	30.0914	2.5		0	2021-08-14	0.620899		1	1.053e-05	3.27691e-05	0.5	1.45824e-08	8.60793e-06	1	0.379101	1.12971	246700	0.011778	0		1.00002	0.947753	0.000590445	0.000574458	0.000590796	00:00:00	249808	2022-07-15			3.32784e+08	2021-08-14	0	0.8
2021-08-15	1.3775e+07	0		0	0.4	204.286	673.339	2.06625e+08	27.8715	2.5		0	2021-08-15	0.62089		1	9.7412e-06	3.03498e-05	0.5	1.2614e-08	7.91053e-06	1	0.37911	1.12971	247000	0.011778	0		1.00002	0.947775	0.000589392	0.000573045	0.000589736	00:00:00	249808	2022-07-15			3.32789e+08	2021-08-15	0	0.8
2021-08-16	1.37751e+07	0		0	0.4	189.214	623.641	2.06626e+08	25.8156	2.5		0	2021-08-16	0.620881		1	9.01155e-06	2.81093e-05	0.5	1.09114e-08	7.26968e-06	1	0.379119	1.12971	247300	0.011778	0		1.00002	0.947798	0.000588341	0.000571636	0.000588678	00:00:00	249809	2022-07-15			3.32795e+08	2021-08-16	0	0.8
2021-08-17	1.37751e+07	0		0	0.4	175.255	577.615	2.06626e+08	23.9115	2.5		0	2021-08-17	0.620872		1	8.33661e-06	2.60343e-05	0.5	9.43877e-09	6.68079e-06	1	0.379128	1.12971	247600	0.011778	0		1.00002	0.94782	0.000587292	0.000570231	0.000587623	00:00:00	249809	2022-07-15			3.328e+08	2021-08-17	0	0.8
2021-08-18	1.37751e+07	0		0	0.4	162.326	534.988	2.06627e+08	22.148	2.5		0	2021-08-18	0.620863		1	7.71229e-06	2.41127e-05	0.5	8.16495e-09	6.13965e-06	1	0.379137	1.12971	247900	0.011778	0		1.00002	0.947843	0.000586245	0.00056883	0.00058657	00:00:00	249809	2022-07-15			3.32806e+08	2021-08-18	0	0.8
2021-08-19	1.37751e+07	0		0	0.4	150.353	495.511	2.06627e+08	20.5147	2.5		0	2021-08-19	0.620853		1	7.13478e-06	2.2333e-05	0.5	7.06312e-09	5.64237e-06	1	0.379147	1.12971	248200	0.011778	0		1.00002	0.947867	0.000585201	0.000567432	0.000585519	00:00:00	249809	2022-07-15			3.32811e+08	2021-08-19	0	0.8
2021-08-20	1.37751e+07	0		0	0.4	139.263	458.949	2.06627e+08	19.0019	2.5		0	2021-08-20	0.620844		1	6.60056e-06	2.06848e-05	0.5	6.11005e-09	5.1854e-06	1	0.379156	1.12971	248500	0.011778	0		1.00002	0.94789	0.000584159	0.000566039	0.000584471	00:00:00	249810	2022-07-15			3.32816e+08	2021-08-20	0	0.8
2021-08-21	1.37752e+07	0		0	0.4	128.992	425.088	2.06627e+08	17.6008	2.5		0	2021-08-21	0.620835		1	6.1064e-06	1.91583e-05	0.5	5.28564e-09	4.76547e-06	1	0.379165	1.12971	248800	0.011778	0		1.00002	0.947913	0.000583119	0.000564649	0.000583424	00:00:00	249810	2022-07-15			3.32822e+08	2021-08-21	0	0.8
2021-08-22	1.37752e+07	0		0	0.4	119.48	393.727	2.06628e+08	16.3032	2.5		0	2021-08-22	0.620825		1	5.64927e-06	1.77447e-05	0.5	4.57252e-09	4.37957e-06	1	0.379175	1.12971	249100	0.011778	0		1.00002	0.947937	0.000582081	0.000563264	0.00058238	00:00:00	249810	2022-07-15			3.32827e+08	2021-08-22	0	0.8
2021-08-23	1.37752e+07	0		0	0.4	110.67	364.683	2.06628e+08	15.1013	2.5		0	2021-08-23	0.620816		1	5.22641e-06	1.64354e-05	0.5	3.95566e-09	4.02495e-06	1	0.379184	1.12971	249400	0.011778	0		1.00003	0.947961	0.000581045	0.000561882	0.000581338	00:00:00	249810	2022-07-15			3.32833e+08	2021-08-23	0	0.8
2021-08-24	1.37752e+07	0		0	0.4	102.51	337.783	2.06628e+08	13.9881	2.5		0	2021-08-24	0.620806		1	4.83524e-06	1.52228e-05	0.5	3.42205e-09	3.69907e-06	1	0.379194	1.12971	249700	0.011778	0		1.00003	0.947985	0.000580012	0.000560504	0.000580298	00:00:00	249810	2022-07-15			3.32838e+08	2021-08-24	0	0.8
2021-08-25	1.37752e+07	0		0	0.4	94.9523	312.869	2.06628e+08	12.957	2.5		0	2021-08-25	0.620796		1	4.47339e-06	1.40998e-05	0.5	2.96046e-09	3.39959e-06	1	0.379204	1.12971	250000	0.011778	0		1.00003	0.948009	0.000578981	0.000559129	0.000579261	00:00:00	249810	2022-07-15			3.32844e+08	2021-08-25	0	0.8
2021-08-26	1.37752e+07	0		0	0.4	87.9525	289.795	2.06628e+08	12.0021	2.5		0	2021-08-26	0.620787		1	4.13865e-06	1.30598e-05	0.5	2.56116e-09	3.12438e-06	1	0.379213	1.12971	250300	0.011778	0		1.00003	0.948033	0.000577951	0.000557759	0.000578225	00:00:00	249811	2022-07-15			3.32849e+08	2021-08-26	0	0.8
2021-08-27	1.37752e+07	0		0	0.4	81.4692	268.425	2.06629e+08	11.1176	2.5		0	2021-08-27	0.620777		1	3.82898e-06	1.20965e-05	0.5	2.21574e-09	2.87147e-06	1	0.379223	1.12971	250600	0.011778	0		1.00003	0.948057	0.000576925	0.000556392	0.000577192	00:00:00	249811	2022-07-15			3.32855e+08	2021-08-27	0	0.8
2021-08-28	1.37753e+07	0		0	0.4	75.4644	248.632	2.06629e+08	10.2983	2.5		0	2021-08-28	0.620767		1	3.54252e-06	1.12043e-05	0.5	1.91693e-09	2.63905e-06	1	0.379233	1.12971	250900	0.011778	0		1.00003	0.948082	0.0005759	0.000555029	0.000576161	00:00:00	249811	2022-07-15			3.3286e+08	2021-08-28	0	0.8
2021-08-29	1.37753e+07	0		0	0.4	69.9026	230.3	2.06629e+08	9.53952	2.5		0	2021-08-29	0.620758		1	3.27752e-06	1.0378e-05	0.5	1.65844e-09	2.42545e-06	1	0.379242	1.12971	251200	0.011778	0		1.00003	0.948106	0.000574877	0.00055367	0.000575132	00:00:00	249811	2022-07-15			3.32866e+08	2021-08-29	0	0.8
2021-08-30	1.37753e+07	0		0	0.4	64.7512	213.321	2.06629e+08	8.83668	2.5		0	2021-08-30	0.620748		1	3.03236e-06	9.61276e-06	0.5	1.43481e-09	2.22916e-06	1	0.379252	1.12971	251500	0.011778	0		1.00003	0.948131	0.000573857	0.000552314	0.000574106	00:00:00	249811	2022-07-15			3.32871e+08	2021-08-30	0	0.8
2021-08-31	1.37753e+07	0		0	0.4	59.9799	197.595	2.06629e+08	8.18569	2.5		0	2021-08-31	0.620738		1	2.80557e-06	8.90396e-06	0.5	1.24136e-09	2.04877e-06	1	0.379262	1.12971	251800	0.011778	0		1.00003	0.948155	0.000572838	0.000550962	0.000573081	00:00:00	249811	2022-07-15			3.32877e+08	2021-08-31	0	0.8
2021-09-01	1.37753e+07	0		0	0.4	56.5083	183.977	2.06629e+08	8.53054	2.5		0	2021-09-01	0.620728		1	2.64004e-06	8.2902e-06	0.555556	1.04861e-09	1.89216e-06	1	0.379272	1.12971	252100	0.011778	0		1.00003	0.94818	0.000571822	0.000549614	0.000572059	00:00:00	249811	2022-07-15			3.32882e+08	2021-09-01	0	0.9
2021-09-02	1.37753e+07	0		0	0.4	53.4278	171.5	2.06629e+08	8.03701	2.5		0	2021-09-02	0.620718		1	2.49315e-06	7.72782e-06	0.555556	8.81853e-10	1.74951e-06	1	0.379282	1.12971	252400	0.011778	0		1.00003	0.948204	0.000570808	0.00054827	0.000571038	00:00:00	249811	2022-07-15			3.32888e+08	2021-09-02	0	0.9
2021-09-03	1.37753e+07	0		0	0.4	50.7285	160.097	2.0663e+08	7.59907	2.5		0	2021-09-03	0.620708		1	2.36438e-06	7.21389e-06	0.555556	7.37585e-10	1.61985e-06	1	0.379292	1.12971	252700	0.011778	0		1.00003	0.948229	0.000569796	0.000546929	0.00057002	00:00:00	249812	2022-07-15			3.32893e+08	2021-09-03	0	0.9
2021-09-04	1.37753e+07	0		0	0.4	48.4043	149.711	2.0663e+08	7.21534	2.5		0	2021-09-04	0.620698		1	2.25338e-06	6.74581e-06	0.555556	6.1277e-10	1.50234e-06	1	0.379302	1.12971	253000	0.011778	0		1.00003	0.948254	0.000568786	0.000545592	0.000569004	00:00:00	249812	2022-07-15			3.32899e+08	2021-09-04	0	0.9
2021-09-05	1.37753e+07	0		0	0.4	46.4526	140.293	2.0663e+08	6.88494	2.5		0	2021-09-05	0.620689		1	2.15996e-06	6.32133e-06	0.555556	5.04785e-10	1.39621e-06	1	0.379311	1.12971	253300	0.011778	0		1.00003	0.948278	0.000567778	0.000544259	0.00056799	00:00:00	249812	2022-07-15			3.32904e+08	2021-09-05	0	0.9
2021-09-06	1.37753e+07	0		0	0.4	44.8744	131.799	2.0663e+08	6.6075	2.5		0	2021-09-06	0.620679		1	2.08411e-06	5.93852e-06	0.555556	4.11359e-10	1.3008e-06	1	0.379321	1.12971	253600	0.011778	0		1.00003	0.948303	0.000566772	0.000542929	0.000566979	00:00:00	249812	2022-07-15			3.32909e+08	2021-09-06	0	0.9
2021-09-07	1.37753e+07	0		0	0.4	42.727	124.194	2.0663e+08	6.38318	2.5		0	2021-09-07	0.620669		1	1.98203e-06	5.59578e-06	0.555556	3.30528e-10	1.21554e-06	1	0.379331	1.12971	253900	0.011778	0		1.00003	0.948328	0.000565769	0.000541603	0.000565969	00:00:00	249812	2022-07-15			3.32915e+08	2021-09-07	0	0.9
2021-09-08	1.37753e+07	0		0	0.4	40.7679	117.315	2.0663e+08	6.07789	2.5		0	2021-09-08	0.620659		1	1.88892e-06	5.28574e-06	0.555556	2.60594e-10	1.13867e-06	1	0.379341	1.12971	254200	0.011778	0		1.00003	0.948353	0.000564767	0.000540281	0.000564962	00:00:00	249812	2022-07-15			3.3292e+08	2021-09-08	0	0.9
2021-09-09	1.37753e+07	0		0	0.4	38.9682	111.113	2.0663e+08	5.79935	2.5		0	2021-09-09	0.620649		1	1.80341e-06	5.00619e-06	0.555556	2.00087e-10	1.06954e-06	1	0.379351	1.12971	254500	0.011778	0		1.00003	0.948378	0.000563768	0.000538962	0.000563956	00:00:00	249812	2022-07-15			3.32926e+08	2021-09-09	0	0.9
2021-09-10	1.37753e+07	0		0	0.4	37.2963	105.539	2.0663e+08	5.54348	2.5		0	2021-09-10	0.620639		1	1.724e-06	4.75497e-06	0.555556	1.47735e-10	1.00754e-06	1	0.379361	1.12971	254800	0.011778	0		1.00003	0.948403	0.000562771	0.000537646	0.000562953	00:00:00	249812	2022-07-15			3.32931e+08	2021-09-10	0	0.9
2021-09-11	1.37754e+07	0		0	0.4	35.7172	100.546	2.0663e+08	5.30579	2.5		0	2021-09-11	0.620629		1	1.64907e-06	4.52996e-06	0.555556	1.0244e-10	9.52071e-07	1	0.379371	1.12971	255100	0.011778	0		1.00003	0.948427	0.000561775	0.000536335	0.000561952	00:00:00	249812	2022-07-15			3.32937e+08	2021-09-11	0	0.9
2021-09-12	1.37754e+07	0		0	0.4	34.191	96.0877	2.0663e+08	5.08127	2.5		0	2021-09-12	0.620619		1	1.57675e-06	4.32903e-06	0.555556	6.32492e-11	9.02557e-07	1	0.379381	1.12971	255400	0.011778	0		1.00003	0.948452	0.000560782	0.000535027	0.000560953	00:00:00	249812	2022-07-15			3.32942e+08	2021-09-12	0	0.9
2021-09-13	1.37754e+07	0		0	0.4	32.6721	92.1153	2.0663e+08	4.86428	2.5		0	2021-09-13	0.620609		1	1.50493e-06	4.14999e-06	0.555556	2.93399e-11	8.58424e-07	1	0.379391	1.12971	255700	0.011778	0		1.00003	0.948477	0.000559791	0.000533722	0.000559956	00:00:00	249812	2022-07-15			3.32948e+08	2021-09-13	0	0.9
2021-09-14	1.37754e+07	0		0	0.4	31.2425	88.5779	2.0663e+08	4.64831	2.5		0	2021-09-14	0.620599		1	1.4374e-06	3.99056e-06	0.555556	0	8.19092e-07	1	0.379401	1.12971	256000	0.011778	0		1.00003	0.948502	0.000558802	0.000532421	0.000558961	00:00:00	249812	2022-07-15			3.32953e+08	2021-09-14	0	0.9
2021-09-15	1.37754e+07	0		0	0.4	29.8882	84.4924	2.06631e+08	4.44504	2.5		0	2021-09-15	0.620589		1	1.37348e-06	3.80644e-06	0.555556	0	7.74961e-07	1	0.379411	1.12971	256300	0.011778	0		1.00003	0.948527	0.000557815	0.000531124	0.000557968	00:00:00	249812	2022-07-15			3.32959e+08	2021-09-15	0	0.9
2021-09-16	1.37754e+07	0		0	0.4	28.5971	80.7079	2.06631e+08	4.25246	2.5		0	2021-09-16	0.620579		1	1.31261e-06	3.63588e-06	0.555556	0	7.3428e-07	1	0.379421	1.12971	256600	0.011778	0		1.00003	0.948552	0.00055683	0.00052983	0.000556977	00:00:00	249812	2022-07-15			3.32964e+08	2021-09-16	0	0.9
2021-09-17	1.37754e+07	0		0	0.4	27.3602	77.1777	2.06631e+08	4.06888	2.5		0	2021-09-17	0.620569		1	1.25437e-06	3.47679e-06	0.555556	0	6.96543e-07	1	0.379431	1.12971	256900	0.011778	0		1.00003	0.948577	0.000555847	0.000528539	0.000555989	00:00:00	249812	2022-07-15			3.3297e+08	2021-09-17	0	0.9
2021-09-18	1.37754e+07	0		0	0.4	26.172	73.8554	2.06631e+08	3.893	2.5		0	2021-09-18	0.620559		1	1.1985e-06	3.32707e-06	0.555556	0	6.61254e-07	1	0.379441	1.12971	257200	0.011778	0		1.00003	0.948603	0.000554866	0.000527253	0.000555002	00:00:00	249813	2022-07-15			3.32975e+08	2021-09-18	0	0.9
2021-09-19	1.37754e+07	0		0	0.4	25.0317	70.6944	2.06631e+08	3.72402	2.5		0	2021-09-19	0.620549		1	1.14494e-06	3.18462e-06	0.555556	0	6.27929e-07	1	0.379451	1.12971	257500	0.011778	0		1.00003	0.948628	0.000553887	0.000525969	0.000554017	00:00:00	249813	2022-07-15			3.32981e+08	2021-09-19	0	0.9
2021-09-20	1.37754e+07	0		0	0.4	23.9453	67.6488	2.06631e+08	3.56186	2.5		0	2021-09-20	0.620539		1	1.09398e-06	3.04737e-06	0.555556	0	5.96096e-07	1	0.379461	1.12971	257800	0.011778	0		1.00003	0.948653	0.00055291	0.000524689	0.000553035	00:00:00	249813	2022-07-15			3.32986e+08	2021-09-20	0	0.9
2021-09-21	1.37754e+07	0		0	0.4	22.9076	64.673	2.06631e+08	3.40736	2.5		0	2021-09-21	0.620529		1	1.04535e-06	2.91327e-06	0.555556	0	5.65297e-07	1	0.379471	1.12971	258100	0.011778	0		1.00003	0.948678	0.000551936	0.000523413	0.000552054	00:00:00	249813	2022-07-15			3.32992e+08	2021-09-21	0	0.9
2021-09-22	1.37754e+07	0		0	0.4	21.9149	61.8549	2.06631e+08	3.25979	2.5		0	2021-09-22	0.620519		1	9.98891e-07	2.78628e-06	0.555556	0	5.3634e-07	1	0.379481	1.12971	258400	0.011778	0		1.00003	0.948703	0.000550963	0.00052214	0.000551076	00:00:00	249813	2022-07-15			3.32997e+08	2021-09-22	0	0.9
2021-09-23	1.37754e+07	0		0	0.4	20.9646	59.1742	2.06631e+08	3.11861	2.5		0	2021-09-23	0.620509		1	9.54469e-07	2.66548e-06	0.555556	0	5.09e-07	1	0.379491	1.12971	258700	0.011778	0		1.00003	0.948728	0.000549992	0.00052087	0.000550099	00:00:00	249813	2022-07-15			3.33003e+08	2021-09-23	0	0.9
2021-09-24	1.37754e+07	0		0	0.4	20.0551	56.6141	2.06631e+08	2.98346	2.5		0	2021-09-24	0.620499		1	9.12003e-07	2.55012e-06	0.555556	0	4.83096e-07	1	0.379501	1.12971	259000	0.011778	0		1.00003	0.948753	0.000549023	0.000519604	0.000549125	00:00:00	249813	2022-07-15			3.33008e+08	2021-09-24	0	0.9
2021-09-25	1.37754e+07	0		0	0.4	19.1852	54.1624	2.06631e+08	2.8541	2.5		0	2021-09-25	0.620489		1	8.71434e-07	2.43965e-06	0.555556	0	4.58488e-07	1	0.379511	1.12971	259300	0.011778	0		1.00003	0.948778	0.000548056	0.000518342	0.000548153	00:00:00	249813	2022-07-15			3.33013e+08	2021-09-25	0	0.9
2021-09-26	1.37754e+07	0		0	0.4	18.3537	51.8115	2.06631e+08	2.73037	2.5		0	2021-09-26	0.620479		1	8.32702e-07	2.33372e-06	0.555556	0	4.35083e-07	1	0.379521	1.12971	259600	0.011778	0		1.00003	0.948804	0.000547092	0.000517083	0.000547182	00:00:00	249813	2022-07-15			3.33019e+08	2021-09-26	0	0.9
2021-09-27	1.37754e+07	0		0	0.4	17.5584	49.5594	2.06631e+08	2.61211	2.5		0	2021-09-27	0.620468		1	7.95702e-07	2.23224e-06	0.555556	0	4.12842e-07	1	0.379532	1.12971	259900	0.011778	0		1.00003	0.948829	0.000546129	0.000515827	0.000546214	00:00:00	249813	2022-07-15			3.33024e+08	2021-09-27	0	0.9
2021-09-28	1.37754e+07	0		0	0.4	16.7976	47.4101	2.06631e+08	2.49899	2.5		0	2021-09-28	0.620458		1	7.60348e-07	2.1354e-06	0.555556	0	3.91783e-07	1	0.379542	1.12971	260200	0.011778	0		1.00003	0.948854	0.000545168	0.000514574	0.000545247	00:00:00	249813	2022-07-15			3.3303e+08	2021-09-28	0	0.9
2021-09-29	1.37754e+07	0		0	0.4	16.0698	45.3558	2.06631e+08	2.39078	2.5		0	2021-09-29	0.620448		1	7.26564e-07	2.04284e-06	0.555556	0	3.71814e-07	1	0.379552	1.12971	260500	0.011778	0		1.00003	0.948879	0.000544209	0.000513325	0.000544283	00:00:00	249813	2022-07-15			3.33035e+08	2021-09-29	0	0.9
2021-09-30	1.37754e+07	0		0	0.4	15.3736	43.3906	2.06631e+08	2.28725	2.5		0	2021-09-30	0.620438		1	6.94287e-07	1.95429e-06	0.555556	0	3.52862e-07	1	0.379562	1.12971	260800	0.011778	0		1.00003	0.948905	0.000543252	0.00051208	0.000543321	00:00:00	249813	2022-07-15			3.33041e+08	2021-09-30	0	0.9
2021-10-01	1.37754e+07	0		0	0.4	14.9508	41.753	2.06631e+08	2.43135	2.5		0	2021-10-01	0.620428		1	6.74419e-07	1.88051e-06	0.6	0	3.36722e-07	1	0.379572	1.12971	261100	0.011778	0		1.00003	0.94893	0.000542297	0.000510837	0.00054236	00:00:00	249813	2022-07-15			3.33046e+08	2021-10-01	0	1
2021-10-02	1.37754e+07	0		0	0.4	14.585	40.2246	2.06631e+08	2.36455	2.5		0	2021-10-02	0.620418		1	6.57162e-07	1.81164e-06	0.6	0	3.21684e-07	1	0.379582	1.12971	261400	0.011778	0		1.00003	0.948955	0.000541344	0.000509599	0.000541402	00:00:00	249813	2022-07-15			3.33052e+08	2021-10-02	0	1
2021-10-03	1.37754e+07	0		0	0.4	14.2797	38.8073	2.06631e+08	2.30675	2.5		0	2021-10-03	0.620408		1	6.42666e-07	1.74778e-06	0.6	0	3.07745e-07	1	0.379592	1.12971	261700	0.011778	0		1.00003	0.94898	0.000540393	0.000508363	0.000540446	00:00:00	249813	2022-07-15			3.33057e+08	2021-10-03	0	1
2021-10-04	1.37754e+07	0		0	0.4	14.0392	37.504	2.06631e+08	2.25852	2.5		0	2021-10-04	0.620398		1	6.3112e-07	1.68905e-06	0.6	0	2.94902e-07	1	0.379602	1.12971	262000	0.011778	0		1.00003	0.949005	0.000539444	0.000507131	0.000539491	00:00:00	249813	2022-07-15			3.33063e+08	2021-10-04	0	1
2021-10-05	1.37754e+07	0		0	0.4	13.869	36.3172	2.06631e+08	2.22055	2.5		0	2021-10-05	0.620388		1	6.22754e-07	1.63557e-06	0.6	0	2.83152e-07	1	0.379612	1.12971	262300	0.011778	0		1.00003	0.949031	0.000538497	0.000505902	0.000538539	00:00:00	249813	2022-07-15			3.33068e+08	2021-10-05	0	1
2021-10-06	1.37754e+07	0		0	0.4	13.7754	35.2511	2.06631e+08	2.19368	2.5		0	2021-10-06	0.620378		1	6.17846e-07	1.58753e-06	0.6	0	2.72505e-07	1	0.379622	1.12971	262600	0.011778	0		1.00003	0.949056	0.000537552	0.000504676	0.000537588	00:00:00	249813	2022-07-15			3.33074e+08	2021-10-06	0	1
2021-10-07	1.37754e+07	0		0	0.4	13.523	34.3114	2.06632e+08	2.17894	2.5		0	2021-10-07	0.620368		1	6.05833e-07	1.54519e-06	0.6	0	2.62982e-07	1	0.379632	1.12971	262900	0.011778	0		1.00003	0.949081	0.000536609	0.000503454	0.00053664	00:00:00	249813	2022-07-15			3.33079e+08	2021-10-07	0	1
2021-10-08	1.37754e+07	0		0	0.4	13.2975	33.467	2.06632e+08	2.13907	2.5		0	2021-10-08	0.620357		1	5.95053e-07	1.50714e-06	0.6	0	2.54331e-07	1	0.379643	1.12971	263200	0.011778	0		1.00003	0.949106	0.000535668	0.000502235	0.000535693	00:00:00	249813	2022-07-15			3.33085e+08	2021-10-08	0	1
2021-10-09	1.37754e+07	0		0	0.4	13.0942	32.7164	2.06632e+08	2.10346	2.5		0	2021-10-09	0.620347		1	5.85288e-07	1.47331e-06	0.6	0	2.46525e-07	1	0.379653	1.12971	263500	0.011778	0		1.00003	0.949132	0.000534728	0.000501019	0.000534748	00:00:00	249813	2022-07-15			3.3309e+08	2021-10-09	0	1
2021-10-10	1.37754e+07	0		0	0.4	12.907	32.0573	2.06632e+08	2.07135	2.5		0	2021-10-10	0.620337		1	5.76266e-07	1.44361e-06	0.6	0	2.39531e-07	1	0.379663	1.12971	263800	0.011778	0		1.00003	0.949157	0.000533791	0.000499807	0.000533806	00:00:00	249813	2022-07-15			3.33096e+08	2021-10-10	0	1
2021-10-11	1.37754e+07	0		0	0.4	12.7283	31.487	2.06632e+08	2.0418	2.5		0	2021-10-11	0.620327		1	5.6764e-07	1.4179e-06	0.6	0	2.33312e-07	1	0.379673	1.12971	264100	0.011778	0		1.00003	0.949182	0.000532855	0.000498597	0.000532865	00:00:00	249813	2022-07-15			3.33101e+08	2021-10-11	0	1
2021-10-12	1.37754e+07	0		0	0.4	12.5482	31.0016	2.06632e+08	2.01358	2.5		0	2021-10-12	0.620317		1	5.58973e-07	1.39602e-06	0.6	0	2.27826e-07	1	0.379683	1.12971	264400	0.011778	0		1.00003	0.949207	0.000531922	0.000497391	0.000531926	00:00:00	249813	2022-07-15			3.33107e+08	2021-10-12	0	1
2021-10-13	1.37754e+07	0		0	0.4	12.3544	30.596	2.06632e+08	1.98514	2.5		0	2021-10-13	0.620307		1	5.49717e-07	1.37773e-06	0.6	0	2.23023e-07	1	0.379693	1.12971	264700	0.011778	0		1.00003	0.949233	0.00053099	0.000496189	0.000530989	00:00:00	249813	2022-07-15			3.33112e+08	2021-10-13	0	1
2021-10-14	1.37754e+07	0		0	0.4	12.1699	30.2633	2.06632e+08	1.95453	2.5		0	2021-10-14	0.620297		1	5.40893e-07	1.36273e-06	0.6	0	2.18839e-07	1	0.379703	1.12971	265000	0.011778	0		1.00003	0.949258	0.00053006	0.000494989	0.000530054	00:00:00	249813	2022-07-15			3.33118e+08	2021-10-14	0	1
2021-10-15	1.37755e+07	0		0	0.4	11.9918	29.7573	2.06632e+08	1.92539	2.5		0	2021-10-15	0.620287		1	5.32376e-07	1.33992e-06	0.6	0	2.13392e-07	1	0.379713	1.12971	265300	0.011778	0		1.00003	0.949283	0.000529133	0.000493793	0.000529121	00:00:00	249813	2022-07-15			3.33123e+08	2021-10-15	0	1
2021-10-16	1.37755e+07	0		0	0.4	11.8177	29.29	2.06632e+08	1.89727	2.5		0	2021-10-16	0.620277		1	5.24055e-07	1.31886e-06	0.6	0	2.08308e-07	1	0.379723	1.12971	265600	0.011778	0		1.00003	0.949309	0.000528207	0.0004926	0.00052819	00:00:00	249813	2022-07-15			3.33128e+08	2021-10-16	0	1
2021-10-17	1.37755e+07	0		0	0.4	11.6457	28.8531	2.06632e+08	1.86978	2.5		0	2021-10-17	0.620266		1	5.15843e-07	1.29916e-06	0.6	0	2.03516e-07	1	0.379734	1.12971	265900	0.011778	0		1.00003	0.949334	0.000527283	0.00049141	0.000527261	00:00:00	249813	2022-07-15			3.33134e+08	2021-10-17	0	1
2021-10-18	1.37755e+07	0		0	0.4	11.4747	28.4371	2.06632e+08	1.84261	2.5		0	2021-10-18	0.620256		1	5.07698e-07	1.28042e-06	0.6	0	1.98943e-07	1	0.379744	1.12971	266200	0.011778	0		1.00003	0.949359	0.00052636	0.000490223	0.000526333	00:00:00	249813	2022-07-15			3.33139e+08	2021-10-18	0	1
2021-10-19	1.37755e+07	0		0	0.4	11.3052	28.0322	2.06632e+08	1.81561	2.5		0	2021-10-19	0.620246		1	4.99633e-07	1.26216e-06	0.6	0	1.94511e-07	1	0.379754	1.12971	266500	0.011778	0		1.00003	0.949384	0.00052544	0.00048904	0.000525408	00:00:00	249813	2022-07-15			3.33145e+08	2021-10-19	0	1
2021-10-20	1.37755e+07	0		0	0.4	11.1395	27.6274	2.06632e+08	1.78883	2.5		0	2021-10-20	0.620236		1	4.91756e-07	1.24391e-06	0.6	0	1.90135e-07	1	0.379764	1.12971	266800	0.011778	0		1.00003	0.94941	0.000524522	0.000487859	0.000524484	00:00:00	249813	2022-07-15			3.3315e+08	2021-10-20	0	1
2021-10-21	1.37755e+07	0		0	0.4	10.9767	27.2111	2.06632e+08	1.76265	2.5		0	2021-10-21	0.620226		1	4.84028e-07	1.22515e-06	0.6	0	1.85729e-07	1	0.379774	1.12971	267100	0.011778	0		1.00003	0.949435	0.000523605	0.000486682	0.000523563	00:00:00	249814	2022-07-15			3.33156e+08	2021-10-21	0	1
2021-10-22	1.37755e+07	0		0	0.4	10.8164	26.809	2.06632e+08	1.73695	2.5		0	2021-10-22	0.620216		1	4.76424e-07	1.20703e-06	0.6	0	1.81483e-07	1	0.379784	1.12971	267400	0.011778	0		1.00003	0.94946	0.00052269	0.000485508	0.000522643	00:00:00	249814	2022-07-15			3.33161e+08	2021-10-22	0	1
2021-10-23	1.37755e+07	0		0	0.4	10.6583	26.4171	2.06632e+08	1.71163	2.5		0	2021-10-23	0.620206		1	4.68932e-07	1.18936e-06	0.6	0	1.77366e-07	1	0.379794	1.12971	267700	0.011778	0		1.00003	0.949486	0.000521777	0.000484337	0.000521725	00:00:00	249814	2022-07-15			3.33167e+08	2021-10-23	0	1
2021-10-24	1.37755e+07	0		0	0.4	10.5023	26.0324	2.06632e+08	1.68665	2.5		0	2021-10-24	0.620196		1	4.61552e-07	1.17202e-06	0.6	0	1.73352e-07	1	0.379804	1.12971	268000	0.011778	0		1.00003	0.949511	0.000520866	0.000483169	0.000520809	00:00:00	249814	2022-07-15			3.33172e+08	2021-10-24	0	1
2021-10-25	1.37755e+07	0		0	0.4	10.3487	25.6526	2.06632e+08	1.66201	2.5		0	2021-10-25	0.620186		1	4.54294e-07	1.15491e-06	0.6	0	1.69424e-07	1	0.379814	1.12971	268300	0.011778	0		1.00003	0.949536	0.000519957	0.000482004	0.000519895	00:00:00	249814	2022-07-15			3.33178e+08	2021-10-25	0	1
2021-10-26	1.37755e+07	0		0	0.4	10.1976	25.2768	2.06632e+08	1.63775	2.5		0	2021-10-26	0.620175		1	4.47162e-07	1.13797e-06	0.6	0	1.65573e-07	1	0.379825	1.12971	268600	0.011778	0		1.00003	0.949561	0.00051905	0.000480843	0.000518983	00:00:00	249814	2022-07-15			3.33183e+08	2021-10-26	0	1
2021-10-27	1.37755e+07	0		0	0.4	10.0489	24.9055	2.06632e+08	1.61388	2.5		0	2021-10-27	0.620165		1	4.40146e-07	1.12124e-06	0.6	0	1.61802e-07	1	0.379835	1.12971	268900	0.011778	0		1.00003	0.949587	0.000518145	0.000479684	0.000518072	00:00:00	249814	2022-07-15			3.33189e+08	2021-10-27	0	1
2021-10-28	1.37755e+07	0		0	0.4	9.90229	24.5414	2.06632e+08	1.59038	2.5		0	2021-10-28	0.620155		1	4.33243e-07	1.10482e-06	0.6	0	1.5813e-07	1	0.379845	1.12971	269200	0.011778	0		1.00003	0.949612	0.000517241	0.000478529	0.000517164	00:00:00	249814	2022-07-15			3.33194e+08	2021-10-28	0	1
2021-10-29	1.37755e+07	0		0	0.4	9.75788	24.1832	2.06632e+08	1.56722	2.5		0	2021-10-29	0.620145		1	4.2645e-07	1.08868e-06	0.6	0	1.54545e-07	1	0.379855	1.12971	269500	0.011778	0		1.00003	0.949637	0.000516339	0.000477377	0.000516257	00:00:00	249814	2022-07-15			3.332e+08	2021-10-29	0	1
2021-10-30	1.37755e+07	0		0	0.4	9.61565	23.8303	2.06632e+08	1.54441	2.5		0	2021-10-30	0.620135		1	4.19766e-07	1.07278e-06	0.6	0	1.51041e-07	1	0.379865	1.12971	269800	0.011778	0		1.00003	0.949663	0.000515439	0.000476227	0.000515352	00:00:00	249814	2022-07-15			3.33205e+08	2021-10-30	0	1
2021-10-31	1.37755e+07	0		0	0.4	9.47557	23.4825	2.06632e+08	1.52194	2.5		0	2021-10-31	0.620125		1	4.13192e-07	1.0571e-06	0.6	0	1.47616e-07	1	0.379875	1.12971	270100	0.011778	0		1.00003	0.949688	0.000514541	0.000475081	0.000514449	00:00:00	249814	2022-07-15			3.33211e+08	2021-10-31	0	1
2021-11-01	1.37755e+07	0		0	0.4	9.33763	23.1397	2.06632e+08	1.49981	2.5		0	2021-11-01	0.620115		1	4.06725e-07	1.04165e-06	0.6	0	1.44268e-07	1	0.379885	1.12971	270400	0.011778	0		1.00003	0.949713	0.000513645	0.000473938	0.000513548	00:00:00	249814	2022-07-15			3.33216e+08	2021-11-01	0	1
2021-11-02	1.37755e+07	0		0	0.4	9.20176	22.8021	2.06632e+08	1.47801	2.5		0	2021-11-02	0.620105		1	4.00363e-07	1.02644e-06	0.6	0	1.40997e-07	1	0.379895	1.12971	270700	0.011778	0		1.00003	0.949739	0.00051275	0.000472798	0.000512649	00:00:00	249814	2022-07-15			3.33222e+08	2021-11-02	0	1
2021-11-03	1.37755e+07	0		0	0.4	9.06793	22.4698	2.06632e+08	1.45655	2.5		0	2021-11-03	0.620094		1	3.94103e-07	1.01146e-06	0.6	0	1.37803e-07	1	0.379906	1.12971	271000	0.011778	0		1.00003	0.949764	0.000511858	0.000471661	0.000511751	00:00:00	249814	2022-07-15			3.33227e+08	2021-11-03	0	1
2021-11-04	1.37755e+07	0		0	0.4	8.93611	22.1426	2.06632e+08	1.4354	2.5		0	2021-11-04	0.620084		1	3.87944e-07	9.96717e-07	0.6	0	1.34682e-07	1	0.379916	1.12971	271300	0.011778	0		1.00003	0.949789	0.000510967	0.000470527	0.000510855	00:00:00	249814	2022-07-15			3.33233e+08	2021-11-04	0	1
2021-11-05	1.37755e+07	0		0	0.4	8.80627	21.8202	2.06632e+08	1.41457	2.5		0	2021-11-05	0.620074		1	3.81886e-07	9.82189e-07	0.6	0	1.31633e-07	1	0.379926	1.12971	271600	0.011778	0		1.00003	0.949815	0.000510078	0.000469396	0.000509961	00:00:00	249814	2022-07-15			3.33238e+08	2021-11-05	0	1
2021-11-06	1.37755e+07	0		0	0.4	8.67839	21.5026	2.06632e+08	1.39405	2.5		0	2021-11-06	0.620064		1	3.75925e-07	9.67879e-07	0.6	0	1.28653e-07	1	0.379936	1.12971	271900	0.011778	0		1.00003	0.94984	0.00050919	0.000468268	0.000509069	00:00:00	249814	2022-07-15			3.33243e+08	2021-11-06	0	1
2021-11-07	1.37755e+07	0		0	0.4	8.55243	21.1898	2.06632e+08	1.37385	2.5		0	2021-11-07	0.620054		1	3.7006e-07	9.53783e-07	0.6	0	1.25741e-07	1	0.379946	1.12971	272200	0.011778	0		1.00003	0.949865	0.000508305	0.000467143	0.000508179	00:00:00	249814	2022-07-15			3.33249e+08	2021-11-07	0	1
2021-11-08	1.37755e+07	0		0	0.4	8.42836	20.8817	2.06632e+08	1.35394	2.5		0	2021-11-08	0.620044		1	3.6429e-07	9.39901e-07	0.6	0	1.22896e-07	1	0.379956	1.12971	272500	0.011778	0		1.00003	0.949891	0.000507421	0.000466021	0.000507291	00:00:00	249814	2022-07-15			3.33254e+08	2021-11-08	0	1
2021-11-09	1.37755e+07	0		0	0.4	8.30615	20.5783	2.06632e+08	1.33434	2.5		0	2021-11-09	0.620034		1	3.58613e-07	9.26229e-07	0.6	0	1.20117e-07	1	0.379966	1.12971	272800	0.011778	0		1.00003	0.949916	0.000506539	0.000464902	0.000506404	00:00:00	249814	2022-07-15			3.3326e+08	2021-11-09	0	1
2021-11-10	1.37755e+07	0		0	0.4	8.18577	20.2795	2.06632e+08	1.31502	2.5		0	2021-11-10	0.620023		1	3.53028e-07	9.12763e-07	0.6	0	1.17401e-07	1	0.379977	1.12971	273100	0.011778	0		1.00003	0.949941	0.000505659	0.000463785	0.000505519	00:00:00	249814	2022-07-15			3.33265e+08	2021-11-10	0	1
2021-11-11	1.37755e+07	0		0	0.4	8.0672	19.9851	2.06632e+08	1.296	2.5		0	2021-11-11	0.620013		1	3.47533e-07	8.99498e-07	0.6	0	1.14747e-07	1	0.379987	1.12971	273400	0.011778	0		1.00003	0.949967	0.000504781	0.000462672	0.000504636	00:00:00	249814	2022-07-15			3.33271e+08	2021-11-11	0	1
2021-11-12	1.37755e+07	0		0	0.4	7.95041	19.6951	2.06632e+08	1.27726	2.5		0	2021-11-12	0.620003		1	3.42126e-07	8.86433e-07	0.6	0	1.12154e-07	1	0.379997	1.12971	273700	0.011778	0		1.00003	0.949992	0.000503904	0.000461562	0.000503755	00:00:00	249814	2022-07-15			3.33276e+08	2021-11-12	0	1
2021-11-13	1.37755e+07	0		0	0.4	7.83537	19.4095	2.06632e+08	1.2588	2.5		0	2021-11-13	0.619993		1	3.36806e-07	8.73564e-07	0.6	0	1.09621e-07	1	0.380007	1.12971	274000	0.011778	0		1.00003	0.950017	0.000503029	0.000460455	0.000502875	00:00:00	249814	2022-07-15			3.33282e+08	2021-11-13	0	1
2021-11-14	1.37755e+07	0		0	0.4	7.72205	19.1282	2.06632e+08	1.24062	2.5		0	2021-11-14	0.619983		1	3.31572e-07	8.60889e-07	0.6	0	1.07145e-07	1	0.380017	1.12971	274300	0.011778	0		1.00003	0.950043	0.000502156	0.00045935	0.000501997	00:00:00	249814	2022-07-15			3.33287e+08	2021-11-14	0	1
2021-11-15	1.37755e+07	0		0	0.4	7.61043	18.8511	2.06632e+08	1.22271	2.5		0	2021-11-15	0.619973		1	3.26422e-07	8.48404e-07	0.6	0	1.04726e-07	1	0.380027	1.12971	274600	0.011778	0		1.00003	0.950068	0.000501285	0.000458249	0.000501122	00:00:00	249814	2022-07-15			3.33293e+08	2021-11-15	0	1
2021-11-16	1.37755e+07	0		0	0.4	7.50047	18.5782	2.06632e+08	1.20507	2.5		0	2021-11-16	0.619963		1	3.21355e-07	8.36106e-07	0.6	0	1.02363e-07	1	0.380037	1.12971	274900	0.011778	0		1.00003	0.950093	0.000500415	0.00045715	0.000500247	00:00:00	249814	2022-07-15			3.33298e+08	2021-11-16	0	1
2021-11-17	1.37755e+07	0		0	0.4	7.39216	18.3093	2.06633e+08	1.18769	2.5		0	2021-11-17	0.619953		1	3.16369e-07	8.23993e-07	0.6	0	1.00053e-07	1	0.380047	1.12971	275200	0.011778	0		1.00003	0.950119	0.000499547	0.000456055	0.000499375	00:00:00	249814	2022-07-15			3.33304e+08	2021-11-17	0	1
2021-11-18	1.37755e+07	0		0	0.4	7.28547	18.0445	2.06633e+08	1.17057	2.5		0	2021-11-18	0.619942		1	3.11464e-07	8.12062e-07	0.6	0	9.7796e-08	1	0.380058	1.12971	275500	0.011778	0		1.00003	0.950144	0.000498681	0.000454962	0.000498504	00:00:00	249814	2022-07-15			3.33309e+08	2021-11-18	0	1
2021-11-19	1.37755e+07	0		0	0.4	7.18038	17.7836	2.06633e+08	1.15371	2.5		0	2021-11-19	0.619932		1	3.06637e-07	8.00309e-07	0.6	0	9.55907e-08	1	0.380068	1.12971	275800	0.011778	0		1.00003	0.950169	0.000497817	0.000453872	0.000497635	00:00:00	249814	2022-07-15			3.33315e+08	2021-11-19	0	1
2021-11-20	1.37755e+07	0		0	0.4	7.07685	17.5267	2.06633e+08	1.1371	2.5		0	2021-11-20	0.619922		1	3.01887e-07	7.88732e-07	0.6	0	9.34358e-08	1	0.380078	1.12971	276100	0.011778	0		1.00003	0.950195	0.000496954	0.000452785	0.000496768	00:00:00	249814	2022-07-15			3.3332e+08	2021-11-20	0	1
2021-11-21	1.37755e+07	0		0	0.4	6.97487	17.2736	2.06633e+08	1.12073	2.5		0	2021-11-21	0.619912		1	2.97214e-07	7.77329e-07	0.6	0	9.13301e-08	1	0.380088	1.12971	276400	0.011778	0		1.00003	0.95022	0.000496093	0.000451701	0.000495903	00:00:00	249814	2022-07-15			3.33326e+08	2021-11-21	0	1
2021-11-22	1.37755e+07	0		0	0.4	6.87441	17.0242	2.06633e+08	1.10461	2.5		0	2021-11-22	0.619902		1	2.92615e-07	7.66096e-07	0.6	0	8.92725e-08	1	0.380098	1.12971	276700	0.011778	0		1.00003	0.950245	0.000495234	0.00045062	0.000495039	00:00:00	249814	2022-07-15			3.33331e+08	2021-11-22	0	1
2021-11-23	1.37755e+07	0		0	0.4	6.77545	16.7786	2.06633e+08	1.08873	2.5		0	2021-11-23	0.619892		1	2.88091e-07	7.55031e-07	0.6	0	8.72618e-08	1	0.380108	1.12971	277000	0.011778	0		1.00003	0.950271	0.000494377	0.000449541	0.000494177	00:00:00	249814	2022-07-15			3.33337e+08	2021-11-23	0	1
2021-11-24	1.37755e+07	0		0	0.4	6.67796	16.5367	2.06633e+08	1.07308	2.5		0	2021-11-24	0.619882		1	2.83638e-07	7.44132e-07	0.6	0	8.5297e-08	1	0.380118	1.12971	277300	0.011778	0		1.00003	0.950296	0.000493521	0.000448466	0.000493317	00:00:00	249814	2022-07-15			3.33342e+08	2021-11-24	0	1
2021-11-25	1.37755e+07	0		0	0.4	6.58192	16.2984	2.06633e+08	1.05767	2.5		0	2021-11-25	0.619871		1	2.79257e-07	7.33395e-07	0.6	0	8.3377e-08	1	0.380129	1.12971	277600	0.011778	0		1.00003	0.950321	0.000492667	0.000447393	0.000492458	00:00:00	249814	2022-07-15			3.33348e+08	2021-11-25	0	1
2021-11-26	1.37755e+07	0		0	0.4	6.48732	16.0636	2.06633e+08	1.04249	2.5		0	2021-11-26	0.619861		1	2.74946e-07	7.22819e-07	0.6	0	8.15008e-08	1	0.380139	1.12971	277900	0.011778	0		1.00003	0.950347	0.000491815	0.000446323	0.000491602	00:00:00	249814	2022-07-15			3.33353e+08	2021-11-26	0	1
2021-11-27	1.37755e+07	0		0	0.4	6.39412	15.8323	2.06633e+08	1.02753	2.5		0	2021-11-27	0.619851		1	2.70704e-07	7.12401e-07	0.6	0	7.96673e-08	1	0.380149	1.12971	278200	0.011778	0		1.00003	0.950372	0.000490964	0.000445256	0.000490747	00:00:00	249814	2022-07-15			3.33359e+08	2021-11-27	0	1
2021-11-28	1.37755e+07	0		0	0.4	6.30231	15.6045	2.06633e+08	1.0128	2.5		0	2021-11-28	0.619841		1	2.6653e-07	7.02138e-07	0.6	0	7.78756e-08	1	0.380159	1.12971	278500	0.011778	0		1.00003	0.950398	0.000490115	0.000444192	0.000489893	00:00:00	249814	2022-07-15			3.33364e+08	2021-11-28	0	1
2021-11-29	1.37755e+07	0		0	0.4	6.21186	15.3801	2.06633e+08	0.998283	2.5		0	2021-11-29	0.619831		1	2.62422e-07	6.92028e-07	0.6	0	7.61248e-08	1	0.380169	1.12971	278800	0.011778	0		1.00003	0.950423	0.000489268	0.00044313	0.000489042	00:00:00	249814	2022-07-15			3.33369e+08	2021-11-29	0	1
2021-11-30	1.37755e+07	0		0	0.4	6.12276	15.159	2.06633e+08	0.983983	2.5		0	2021-11-30	0.619821		1	2.5838e-07	6.82069e-07	0.6	0	7.44138e-08	1	0.380179	1.12971	279100	0.011778	0		1.00003	0.950448	0.000488422	0.000442071	0.000488192	00:00:00	249814	2022-07-15			3.33375e+08	2021-11-30	0	1
2021-12-01	1.37755e+07	0		0	0.4	6.03498	14.9412	2.06633e+08	0.969895	2.5		0	2021-12-01	0.619811		1	2.54402e-07	6.72258e-07	0.6	0	7.27418e-08	1	0.380189	1.12971	279400	0.011778	0		1.00003	0.950474	0.000487578	0.000441015	0.000487344	00:00:00	249814	2022-07-15			3.3338e+08	2021-12-01	0	1
2021-12-02	1.37755e+07	0		0	0.4	5.94851	14.7266	2.06633e+08	0.956016	2.5		0	2021-12-02	0.6198		1	2.50488e-07	6.62594e-07	0.6	0	7.11078e-08	1	0.3802	1.12971	279700	0.011778	0		1.00003	0.950499	0.000486736	0.000439962	0.000486497	00:00:00	249814	2022-07-15			3.33386e+08	2021-12-02	0	1
2021-12-03	1.37755e+07	0		0	0.4	5.86332	14.5153	2.06633e+08	0.942342	2.5		0	2021-12-03	0.61979		1	2.46636e-07	6.53073e-07	0.6	0	6.9511e-08	1	0.38021	1.12971	280000	0.011778	0		1.00003	0.950524	0.000485896	0.000438912	0.000485652	00:00:00	249814	2022-07-15			3.33391e+08	2021-12-03	0	1
2021-12-04	1.37755e+07	0		0	0.4	5.77939	14.307	2.06633e+08	0.928871	2.5		0	2021-12-04	0.61978		1	2.42845e-07	6.43694e-07	0.6	0	6.79506e-08	1	0.38022	1.12971	280300	0.011778	0		1.00003	0.95055	0.000485057	0.000437864	0.000484809	00:00:00	249814	2022-07-15			3.33397e+08	2021-12-04	0	1
2021-12-05	1.37755e+07	0		0	0.4	5.69671	14.1019	2.06633e+08	0.9156	2.5		0	2021-12-05	0.61977		1	2.39115e-07	6.34455e-07	0.6	0	6.64256e-08	1	0.38023	1.12971	280600	0.011778	0		1.00003	0.950575	0.00048422	0.000436819	0.000483968	00:00:00	249814	2022-07-15			3.33402e+08	2021-12-05	0	1
2021-12-06	1.37755e+07	0		0	0.4	5.61525	13.8998	2.06633e+08	0.902524	2.5		0	2021-12-06	0.61976		1	2.35444e-07	6.25352e-07	0.6	0	6.49353e-08	1	0.38024	1.12971	280900	0.011778	0		1.00003	0.9506	0.000483384	0.000435777	0.000483128	00:00:00	249814	2022-07-15			3.33408e+08	2021-12-06	0	1
2021-12-07	1.37755e+07	0		0	0.4	5.535	13.7007	2.06633e+08	0.889643	2.5		0	2021-12-07	0.61975		1	2.31832e-07	6.16385e-07	0.6	0	6.34789e-08	1	0.38025	1.12971	281200	0.011778	0		1.00003	0.950626	0.00048255	0.000434738	0.00048229	00:00:00	249814	2022-07-15			3.33413e+08	2021-12-07	0	1
2021-12-08	1.37755e+07	0		0	0.4	5.45593	13.5046	2.06633e+08	0.876952	2.5		0	2021-12-08	0.61974		1	2.28277e-07	6.07551e-07	0.6	0	6.20556e-08	1	0.38026	1.12971	281500	0.011778	0		1.00003	0.950651	0.000481718	0.000433701	0.000481454	00:00:00	249814	2022-07-15			3.33419e+08	2021-12-08	0	1
2021-12-09	1.37755e+07	0		0	0.4	5.37804	13.3114	2.06633e+08	0.864448	2.5		0	2021-12-09	0.619729		1	2.24778e-07	5.98849e-07	0.6	0	6.06646e-08	1	0.380271	1.12971	281800	0.011778	0		1.00003	0.950677	0.000480888	0.000432667	0.000480619	00:00:00	249814	2022-07-15			3.33424e+08	2021-12-09	0	1
2021-12-10	1.37755e+07	0		0	0.4	5.3013	13.121	2.06633e+08	0.852129	2.5		0	2021-12-10	0.619719		1	2.21335e-07	5.90275e-07	0.6	0	5.93051e-08	1	0.380281	1.12971	282100	0.011778	0		1.00003	0.950702	0.000480059	0.000431635	0.000479786	00:00:00	249814	2022-07-15			3.3343e+08	2021-12-10	0	1
2021-12-11	1.37755e+07	0		0	0.4	5.22569	12.9335	2.06633e+08	0.839992	2.5		0	2021-12-11	0.619709		1	2.17946e-07	5.81829e-07	0.6	0	5.79766e-08	1	0.380291	1.12971	282400	0.011778	0		1.00003	0.950727	0.000479232	0.000430607	0.000478955	00:00:00	249814	2022-07-15			3.33435e+08	2021-12-11	0	1
2021-12-12	1.37755e+07	0		0	0.4	5.1512	12.7487	2.06633e+08	0.828034	2.5		0	2021-12-12	0.619699		1	2.14612e-07	5.73507e-07	0.6	0	5.66782e-08	1	0.380301	1.12971	282700	0.011778	0		1.00003	0.950753	0.000478406	0.000429581	0.000478125	00:00:00	249814	2022-07-15			3.33441e+08	2021-12-12	0	1
2021-12-13	1.37755e+07	0		0	0.4	5.07781	12.5667	2.06633e+08	0.816252	2.5		0	2021-12-13	0.619689		1	2.1133e-07	5.65309e-07	0.6	0	5.54092e-08	1	0.380311	1.12971	283000	0.011778	0		1.00003	0.950778	0.000477582	0.000428558	0.000477297	00:00:00	249814	2022-07-15			3.33446e+08	2021-12-13	0	1
2021-12-14	1.37755e+07	0		0	0.4	5.0055	12.3873	2.06633e+08	0.804645	2.5		0	2021-12-14	0.619679		1	2.081e-07	5.57233e-07	0.6	0	5.41691e-08	1	0.380321	1.12971	283300	0.011778	0		1.00003	0.950803	0.00047676	0.000427537	0.00047647	00:00:00	249814	2022-07-15			3.33452e+08	2021-12-14	0	1
2021-12-15	1.37755e+07	0		0	0.4	4.93426	12.2107	2.06633e+08	0.793208	2.5		0	2021-12-15	0.619668		1	2.04921e-07	5.49275e-07	0.6	0	5.2957e-08	1	0.380332	1.12971	283600	0.011778	0		1.00003	0.950829	0.000475939	0.000426519	0.000475646	00:00:00	249814	2022-07-15			3.33457e+08	2021-12-15	0	1
2021-12-16	1.37755e+07	0		0	0.4	4.86407	12.0366	2.06633e+08	0.781939	2.5		0	2021-12-16	0.619658		1	2.01793e-07	5.41436e-07	0.6	0	5.17725e-08	1	0.380342	1.12971	283900	0.011778	0		1.00003	0.950854	0.00047512	0.000425504	0.000474822	00:00:00	249814	2022-07-15			3.33463e+08	2021-12-16	0	1
2021-12-17	1.37755e+07	0		0	0.4	4.79492	11.8651	2.06633e+08	0.770837	2.5		0	2021-12-17	0.619648		1	1.98714e-07	5.33712e-07	0.6	0	5.06147e-08	1	0.380352	1.12971	284200	0.011778	0		1.00003	0.95088	0.000474303	0.000424491	0.000474001	00:00:00	249814	2022-07-15			3.33468e+08	2021-12-17	0	1
2021-12-18	1.37755e+07	0		0	0.4	4.72678	11.6961	2.06633e+08	0.759898	2.5		0	2021-12-18	0.619638		1	1.95683e-07	5.26103e-07	0.6	0	4.94832e-08	1	0.380362	1.12971	284500	0.011778	0		1.00003	0.950905	0.000473487	0.000423481	0.000473181	00:00:00	249814	2022-07-15			3.33474e+08	2021-12-18	0	1
2021-12-19	1.37755e+07	0		0	0.4	4.65965	11.5296	2.06633e+08	0.74912	2.5		0	2021-12-19	0.619628		1	1.92701e-07	5.18606e-07	0.6	0	4.83774e-08	1	0.380372	1.12971	284800	0.011778	0		1.00003	0.95093	0.000472673	0.000422474	0.000472363	00:00:00	249814	2022-07-15			3.33479e+08	2021-12-19	0	1
2021-12-20	1.37755e+07	0		0	0.4	4.5935	11.3656	2.06633e+08	0.7385	2.5		0	2021-12-20	0.619618		1	1.89766e-07	5.1122e-07	0.6	0	4.72966e-08	1	0.380382	1.12971	285100	0.011778	0		1.00003	0.950956	0.00047186	0.000421469	0.000471546	00:00:00	249814	2022-07-15			3.33485e+08	2021-12-20	0	1
2021-12-21	1.37755e+07	0		0	0.4	4.52833	11.204	2.06633e+08	0.728036	2.5		0	2021-12-21	0.619608		1	1.86877e-07	5.03943e-07	0.6	0	4.62402e-08	1	0.380392	1.12971	285400	0.011778	0		1.00003	0.950981	0.000471049	0.000420467	0.000470731	00:00:00	249814	2022-07-15			3.3349e+08	2021-12-21	0	1
2021-12-22	1.37755e+07	0		0	0.4	4.46412	11.0448	2.06633e+08	0.717726	2.5		0	2021-12-22	0.619597		1	1.84033e-07	4.96773e-07	0.6	0	4.52077e-08	1	0.380403	1.12971	285700	0.011778	0		1.00003	0.951006	0.00047024	0.000419467	0.000469918	00:00:00	249814	2022-07-15			3.33496e+08	2021-12-22	0	1
2021-12-23	1.37755e+07	0		0	0.4	4.40085	10.8879	2.06633e+08	0.707567	2.5		0	2021-12-23	0.619587		1	1.81235e-07	4.89708e-07	0.6	0	4.41986e-08	1	0.380413	1.12971	286000	0.011778	0		1.00003	0.951032	0.000469432	0.00041847	0.000469106	00:00:00	249814	2022-07-15			3.33501e+08	2021-12-23	0	1
2021-12-24	1.37755e+07	0		0	0.4	4.33851	10.7333	2.06633e+08	0.697557	2.5		0	2021-12-24	0.619577		1	1.7848e-07	4.82748e-07	0.6	0	4.32124e-08	1	0.380423	1.12971	286300	0.011778	0		1.00003	0.951057	0.000468626	0.000417476	0.000468296	00:00:00	249814	2022-07-15			3.33507e+08	2021-12-24	0	1
2021-12-25	1.37755e+07	0		0	0.4	4.27708	10.581	2.06633e+08	0.687695	2.5		0	2021-12-25	0.619567		1	1.75769e-07	4.75891e-07	0.6	0	4.22484e-08	1	0.380433	1.12971	286600	0.011778	0		1.00003	0.951083	0.000467821	0.000416484	0.000467487	00:00:00	249814	2022-07-15			3.33512e+08	2021-12-25	0	1
2021-12-26	1.37755e+07	0		0	0.4	4.21656	10.431	2.06633e+08	0.677976	2.5		0	2021-12-26	0.619557		1	1.73101e-07	4.69134e-07	0.6	0	4.13062e-08	1	0.380443	1.12971	286900	0.011778	0		1.00003	0.951108	0.000467018	0.000415495	0.00046668	00:00:00	249814	2022-07-15			3.33517e+08	2021-12-26	0	1
2021-12-27	1.37755e+07	0		0	0.4	4.15692	10.2831	2.06633e+08	0.6684	2.5		0	2021-12-27	0.619547		1	1.70474e-07	4.62477e-07	0.6	0	4.03853e-08	1	0.380453	1.12971	287200	0.011778	0		1.00003	0.951133	0.000466217	0.000414508	0.000465875	00:00:00	249814	2022-07-15			3.33523e+08	2021-12-27	0	1
2021-12-28	1.37755e+07	0		0	0.4	4.09816	10.1374	2.06633e+08	0.658964	2.5		0	2021-12-28	0.619536		1	1.67889e-07	4.55917e-07	0.6	0	3.94852e-08	1	0.380464	1.12971	287500	0.011778	0		1.00003	0.951159	0.000465417	0.000413524	0.000465071	00:00:00	249814	2022-07-15			3.33528e+08	2021-12-28	0	1
2021-12-29	1.37755e+07	0		0	0.4	4.04026	9.99388	2.06633e+08	0.649667	2.5		0	2021-12-29	0.619526		1	1.65344e-07	4.49454e-07	0.6	0	3.86054e-08	1	0.380474	1.12971	287800	0.011778	0		1.00003	0.951184	0.000464619	0.000412543	0.000464269	00:00:00	249814	2022-07-15			3.33534e+08	2021-12-29	0	1
2021-12-30	1.37755e+07	0		0	0.4	3.98321	9.85245	2.06633e+08	0.640505	2.5		0	2021-12-30	0.619516		1	1.6284e-07	4.43086e-07	0.6	0	3.77455e-08	1	0.380484	1.12971	288100	0.011778	0		1.00003	0.95121	0.000463822	0.000411564	0.000463469	00:00:00	249814	2022-07-15			3.33539e+08	2021-12-30	0	1
2021-12-31	1.37755e+07	0		0	0.4	3.92699	9.71309	2.06633e+08	0.631477	2.5		0	2021-12-31	0.619506		1	1.60375e-07	4.36812e-07	0.6	0	3.6905e-08	1	0.380494	1.12971	288400	0.011778	0		1.00003	0.951235	0.000463027	0.000410587	0.00046267	00:00:00	249814	2022-07-15			3.33545e+08	2021-12-31	0	1
2022-01-01	1.37755e+07	0		0	0.4	3.8716	9.57577	2.06633e+08	0.622582	2.5		0	2022-01-01	0.619496		1	1.57948e-07	4.30629e-07	0.6	0	3.60835e-08	1	0.380504	1.12971	288700	0.011778	0		1.00003	0.95126	0.000462233	0.000409613	0.000461872	00:00:00	249814	2022-07-15			3.3355e+08	2022-01-01	0	1
2022-01-02	1.37755e+07	0		0	0.4	3.81701	9.44047	2.06633e+08	0.613816	2.5		0	2022-01-02	0.619486		1	1.5556e-07	4.24538e-07	0.6	0	3.52804e-08	1	0.380514	1.12971	289000	0.011778	0		1.00003	0.951286	0.000461441	0.000408642	0.000461076	00:00:00	249814	2022-07-15			3.33556e+08	2022-01-02	0	1
2022-01-03	1.37755e+07	0		0	0.4	3.76323	9.30715	2.06633e+08	0.605178	2.5		0	2022-01-03	0.619476		1	1.53208e-07	4.18535e-07	0.6	0	3.44955e-08	1	0.380524	1.12971	289300	0.011778	0		1.00003	0.951311	0.000460651	0.000407673	0.000460282	00:00:00	249814	2022-07-15			3.33561e+08	2022-01-03	0	1
2022-01-04	1.37755e+07	0		0	0.4	3.71022	9.17578	2.06633e+08	0.596666	2.5		0	2022-01-04	0.619465		1	1.50894e-07	4.12621e-07	0.6	0	3.37283e-08	1	0.380535	1.12971	289600	0.011778	0		1.00003	0.951336	0.000459862	0.000406707	0.000459489	00:00:00	249815	2022-07-15			3.33567e+08	2022-01-04	0	1
2022-01-05	1.37755e+07	0		0	0.4	3.658	9.04633	2.06633e+08	0.588279	2.5		0	2022-01-05	0.619455		1	1.48616e-07	4.06793e-07	0.6	0	3.29784e-08	1	0.380545	1.12971	289900	0.011778	0		1.00003	0.951362	0.000459075	0.000405743	0.000458698	00:00:00	249815	2022-07-15			3.33572e+08	2022-01-05	0	1
2022-01-06	1.37755e+07	0		0	0.4	3.60653	8.91878	2.06633e+08	0.580013	2.5		0	2022-01-06	0.619445		1	1.46374e-07	4.01051e-07	0.6	0	3.22454e-08	1	0.380555	1.12971	290200	0.011778	0		1.00003	0.951387	0.000458289	0.000404782	0.000457909	00:00:00	249815	2022-07-15			3.33578e+08	2022-01-06	0	1
2022-01-07	1.37755e+07	0		0	0.4	3.55582	8.79309	2.06633e+08	0.571868	2.5		0	2022-01-07	0.619435		1	1.44167e-07	3.95392e-07	0.6	0	3.15289e-08	1	0.380565	1.12971	290500	0.011778	0		1.00003	0.951413	0.000457505	0.000403823	0.000457121	00:00:00	249815	2022-07-15			3.33583e+08	2022-01-07	0	1
2022-01-08	1.37755e+07	0		0	0.4	3.50585	8.66924	2.06633e+08	0.563842	2.5		0	2022-01-08	0.619425		1	1.41994e-07	3.89817e-07	0.6	0	3.08285e-08	1	0.380575	1.12971	290800	0.011778	0		1.00003	0.951438	0.000456722	0.000402866	0.000456334	00:00:00	249815	2022-07-15			3.33589e+08	2022-01-08	0	1
2022-01-09	1.37755e+07	0		0	0.4	3.4566	8.54719	2.06633e+08	0.555933	2.5		0	2022-01-09	0.619415		1	1.39855e-07	3.84323e-07	0.6	0	3.01439e-08	1	0.380585	1.12971	291100	0.011778	0		1.00003	0.951463	0.000455941	0.000401912	0.000455549	00:00:00	249815	2022-07-15			3.33594e+08	2022-01-09	0	1
2022-01-10	1.37755e+07	0		0	0.4	3.40807	8.42693	2.06633e+08	0.548138	2.5		0	2022-01-10	0.619404		1	1.3775e-07	3.78909e-07	0.6	0	2.94747e-08	1	0.380596	1.12971	291400	0.011778	0		1.00003	0.951489	0.000455161	0.000400961	0.000454766	00:00:00	249815	2022-07-15			3.336e+08	2022-01-10	0	1
2022-01-11	1.37755e+07	0		0	0.4	3.36025	8.30842	2.06633e+08	0.540457	2.5		0	2022-01-11	0.619394		1	1.35677e-07	3.73574e-07	0.6	0	2.88205e-08	1	0.380606	1.12971	291700	0.011778	0		1.00003	0.951514	0.000454383	0.000400012	0.000453984	00:00:00	249815	2022-07-15			3.33605e+08	2022-01-11	0	1
2022-01-12	1.37755e+07	0		0	0.4	3.31313	8.19164	2.06633e+08	0.532888	2.5		0	2022-01-12	0.619384		1	1.33637e-07	3.68317e-07	0.6	0	2.81811e-08	1	0.380616	1.12971	292000	0.011778	0		1.00003	0.95154	0.000453606	0.000399065	0.000453204	00:00:00	249815	2022-07-15			3.33611e+08	2022-01-12	0	1
2022-01-13	1.37755e+07	0		0	0.4	3.26669	8.07657	2.06633e+08	0.525429	2.5		0	2022-01-13	0.619374		1	1.31628e-07	3.63137e-07	0.6	0	2.7556e-08	1	0.380626	1.12971	292300	0.011778	0		1.00003	0.951565	0.000452831	0.000398121	0.000452425	00:00:00	249815	2022-07-15			3.33616e+08	2022-01-13	0	1
2022-01-14	1.37755e+07	0		0	0.4	3.22092	7.96317	2.06633e+08	0.518078	2.5		0	2022-01-14	0.619364		1	1.29651e-07	3.58033e-07	0.6	0	2.6945e-08	1	0.380636	1.12971	292600	0.011778	0		1.00003	0.95159	0.000452058	0.000397179	0.000451648	00:00:00	249815	2022-07-15			3.33622e+08	2022-01-14	0	1
2022-01-15	1.37755e+07	0		0	0.4	3.17582	7.85142	2.06633e+08	0.510833	2.5		0	2022-01-15	0.619354		1	1.27705e-07	3.53003e-07	0.6	0	2.63477e-08	1	0.380646	1.12971	292900	0.011778	0		1.00003	0.951616	0.000451286	0.00039624	0.000450872	00:00:00	249815	2022-07-15			3.33627e+08	2022-01-15	0	1
2022-01-16	1.37755e+07	0		0	0.4	3.13138	7.7413	2.06633e+08	0.503694	2.5		0	2022-01-16	0.619344		1	1.25789e-07	3.48046e-07	0.6	0	2.57638e-08	1	0.380656	1.12971	293200	0.011778	0		1.00003	0.951641	0.000450515	0.000395303	0.000450098	00:00:00	249815	2022-07-15			3.33633e+08	2022-01-16	0	1
2022-01-17	1.37755e+07	0		0	0.4	3.08758	7.63278	2.06633e+08	0.496658	2.5		0	2022-01-17	0.619333		1	1.23903e-07	3.43161e-07	0.6	0	2.51931e-08	1	0.380667	1.12971	293500	0.011778	0		1.00003	0.951667	0.000449746	0.000394369	0.000449325	00:00:00	249815	2022-07-15			3.33638e+08	2022-01-17	0	1
2022-01-18	1.37755e+07	0		0	0.4	3.04442	7.52583	2.06633e+08	0.489724	2.5		0	2022-01-18	0.619323		1	1.22046e-07	3.38348e-07	0.6	0	2.46351e-08	1	0.380677	1.12971	293800	0.011778	0		1.00003	0.951692	0.000448978	0.000393437	0.000448554	00:00:00	249815	2022-07-15			3.33644e+08	2022-01-18	0	1
2022-01-19	1.37755e+07	0		0	0.4	3.00188	7.42045	2.06633e+08	0.482891	2.5		0	2022-01-19	0.619313		1	1.20218e-07	3.33604e-07	0.6	0	2.40897e-08	1	0.380687	1.12971	294100	0.011778	0		1.00003	0.951717	0.000448212	0.000392507	0.000447784	00:00:00	249815	2022-07-15			3.33649e+08	2022-01-19	0	1
2022-01-20	1.37755e+07	0		0	0.4	2.95996	7.31659	2.06633e+08	0.476157	2.5		0	2022-01-20	0.619303		1	1.18418e-07	3.2893e-07	0.6	0	2.35565e-08	1	0.380697	1.12971	294400	0.011778	0		1.00003	0.951743	0.000447448	0.00039158	0.000447016	00:00:00	249815	2022-07-15			3.33655e+08	2022-01-20	0	1
2022-01-21	1.37755e+07	0		0	0.4	2.91864	7.21424	2.06633e+08	0.46952	2.5		0	2022-01-21	0.619293		1	1.16647e-07	3.24323e-07	0.6	0	2.30353e-08	1	0.380707	1.12971	294700	0.011778	0		1.00003	0.951768	0.000446685	0.000390655	0.000446249	00:00:00	249815	2022-07-15			3.3366e+08	2022-01-21	0	1
2022-01-22	1.37756e+07	0		0	0.4	2.87793	7.11338	2.06633e+08	0.462979	2.5		0	2022-01-22	0.619283		1	1.14902e-07	3.19783e-07	0.6	0	2.25257e-08	1	0.380717	1.12971	295000	0.011778	0		1.00003	0.951794	0.000445923	0.000389732	0.000445484	00:00:00	249815	2022-07-15			3.33666e+08	2022-01-22	0	1
2022-01-23	1.37756e+07	0		0	0.4	2.8378	7.01398	2.06633e+08	0.456532	2.5		0	2022-01-23	0.619272		1	1.13185e-07	3.1531e-07	0.6	0	2.20276e-08	1	0.380728	1.12971	295300	0.011778	0		1.00003	0.951819	0.000445163	0.000388812	0.000444721	00:00:00	249815	2022-07-15			3.33671e+08	2022-01-23	0	1
2022-01-24	1.37756e+07	0		0	0.4	2.79826	6.91602	2.06633e+08	0.450179	2.5		0	2022-01-24	0.619262		1	1.11495e-07	3.10901e-07	0.6	0	2.15407e-08	1	0.380738	1.12971	295600	0.011778	0		1.00003	0.951844	0.000444404	0.000387894	0.000443958	00:00:00	249815	2022-07-15			3.33677e+08	2022-01-24	0	1
2022-01-25	1.37756e+07	0		0	0.4	2.75928	6.81948	2.06633e+08	0.443918	2.5		0	2022-01-25	0.619252		1	1.0983e-07	3.06556e-07	0.6	0	2.10646e-08	1	0.380748	1.12971	295900	0.011778	0		1.00003	0.95187	0.000443647	0.000386979	0.000443198	00:00:00	249815	2022-07-15			3.33682e+08	2022-01-25	0	1
2022-01-26	1.37756e+07	0		0	0.4	2.72087	6.72434	2.06633e+08	0.437747	2.5		0	2022-01-26	0.619242		1	1.08192e-07	3.02274e-07	0.6	0	2.05992e-08	1	0.380758	1.12971	296200	0.011778	0		1.00003	0.951895	0.000442891	0.000386066	0.000442439	00:00:00	249815	2022-07-15			3.33687e+08	2022-01-26	0	1
2022-01-27	1.37756e+07	0		0	0.4	2.68302	6.63057	2.06633e+08	0.431664	2.5		0	2022-01-27	0.619232		1	1.06579e-07	2.98054e-07	0.6	0	2.01443e-08	1	0.380768	1.12971	296500	0.011778	0		1.00003	0.951921	0.000442137	0.000385155	0.000441681	00:00:00	249815	2022-07-15			3.33693e+08	2022-01-27	0	1
2022-01-28	1.37756e+07	0		0	0.4	2.64571	6.53817	2.06633e+08	0.42567	2.5		0	2022-01-28	0.619222		1	1.0499e-07	2.93896e-07	0.6	0	1.96995e-08	1	0.380778	1.12971	296800	0.011778	0		1.00003	0.951946	0.000441384	0.000384247	0.000440925	00:00:00	249815	2022-07-15			3.33698e+08	2022-01-28	0	1
2022-01-29	1.37756e+07	0		0	0.4	2.60894	6.44709	2.06633e+08	0.419762	2.5		0	2022-01-29	0.619211		1	1.03427e-07	2.89797e-07	0.6	0	1.92647e-08	1	0.380789	1.12971	297100	0.011778	0		1.00003	0.951971	0.000440633	0.000383341	0.00044017	00:00:00	249815	2022-07-15			3.33704e+08	2022-01-29	0	1
2022-01-30	1.37756e+07	0		0	0.4	2.5727	6.35734	2.06633e+08	0.413939	2.5		0	2022-01-30	0.619201		1	1.01887e-07	2.85758e-07	0.6	0	1.88396e-08	1	0.380799	1.12971	297400	0.011778	0		1.00003	0.951997	0.000439883	0.000382437	0.000439417	00:00:00	249815	2022-07-15			3.33709e+08	2022-01-30	0	1
2022-01-31	1.37756e+07	0		0	0.4	2.53698	6.26888	2.06633e+08	0.4082	2.5		0	2022-01-31	0.619191		1	1.00371e-07	2.81777e-07	0.6	0	1.8424e-08	1	0.380809	1.12971	297700	0.011778	0		1.00003	0.952022	0.000439135	0.000381535	0.000438665	00:00:00	249815	2022-07-15			3.33715e+08	2022-01-31	0	1
2022-02-01	1.37756e+07	0		0	0.4	2.50178	6.1817	2.06633e+08	0.402544	2.5		0	2022-02-01	0.619181		1	9.8879e-08	2.77854e-07	0.6	0	1.80177e-08	1	0.380819	1.12971	298000	0.011778	0		1.00003	0.952048	0.000438388	0.000380636	0.000437915	00:00:00	249815	2022-07-15			3.3372e+08	2022-02-01	0	1
2022-02-02	1.37756e+07	0		0	0.4	2.46709	6.09578	2.06633e+08	0.396969	2.5		0	2022-02-02	0.619171		1	9.74096e-08	2.73987e-07	0.6	0	1.76205e-08	1	0.380829	1.12971	298300	0.011778	0		1.00003	0.952073	0.000437643	0.000379739	0.000437166	00:00:00	249815	2022-07-15			3.33726e+08	2022-02-02	0	1
2022-02-03	1.37756e+07	0		0	0.4	2.43289	6.0111	2.06633e+08	0.391474	2.5		0	2022-02-03	0.619161		1	9.59629e-08	2.70177e-07	0.6	0	1.72321e-08	1	0.380839	1.12971	298600	0.011778	0		1.00003	0.952098	0.000436899	0.000378845	0.000436418	00:00:00	249815	2022-07-15			3.33731e+08	2022-02-03	0	1
2022-02-04	1.37756e+07	0		0	0.4	2.39919	5.92764	2.06633e+08	0.386058	2.5		0	2022-02-04	0.61915		1	9.45385e-08	2.66421e-07	0.6	0	1.68525e-08	1	0.38085	1.12971	298900	0.011778	0		1.00003	0.952124	0.000436156	0.000377952	0.000435672	00:00:00	249815	2022-07-15			3.33737e+08	2022-02-04	0	1
2022-02-05	1.37756e+07	0		0	0.4	2.36597	5.84538	2.06633e+08	0.38072	2.5		0	2022-02-05	0.61914		1	9.31361e-08	2.6272e-07	0.6	0	1.64813e-08	1	0.38086	1.12971	299200	0.011778	0		1.00003	0.952149	0.000435415	0.000377062	0.000434928	00:00:00	249815	2022-07-15			3.33742e+08	2022-02-05	0	1
2022-02-06	1.37756e+07	0		0	0.4	2.33322	5.7643	2.06633e+08	0.375459	2.5		0	2022-02-06	0.61913		1	9.17552e-08	2.59072e-07	0.6	0	1.61184e-08	1	0.38087	1.12971	299500	0.011778	0		1.00003	0.952175	0.000434675	0.000376175	0.000434185	00:00:00	249815	2022-07-15			3.33748e+08	2022-02-06	0	1
2022-02-07	1.37756e+07	0		0	0.4	2.30095	5.6844	2.06633e+08	0.370273	2.5		0	2022-02-07	0.61912		1	9.03956e-08	2.55476e-07	0.6	0	1.57636e-08	1	0.38088	1.12971	299800	0.011778	0		1.00003	0.9522	0.000433937	0.000375289	0.000433443	00:00:00	249815	2022-07-15			3.33753e+08	2022-02-07	0	1
2022-02-08	1.37756e+07	0		0	0.4	2.26915	5.60564	2.06633e+08	0.365161	2.5		0	2022-02-08	0.61911		1	8.90569e-08	2.51932e-07	0.6	0	1.54167e-08	1	0.38089	1.12971	300100	0.011778	0		1.00003	0.952225	0.0004332	0.000374406	0.000432703	00:00:00	249815	2022-07-15			3.33759e+08	2022-02-08	0	1
2022-02-09	1.37756e+07	0		0	0.4	2.23779	5.52802	2.06633e+08	0.360123	2.5		0	2022-02-09	0.6191		1	8.77387e-08	2.4844e-07	0.6	0	1.50775e-08	1	0.3809	1.12971	300400	0.011778	0		1.00003	0.952251	0.000432464	0.000373525	0.000431964	00:00:00	249815	2022-07-15			3.33764e+08	2022-02-09	0	1
2022-02-10	1.37756e+07	0		0	0.4	2.20689	5.45151	2.06633e+08	0.355157	2.5		0	2022-02-10	0.61909		1	8.64408e-08	2.44997e-07	0.6	0	1.47459e-08	1	0.38091	1.12971	300700	0.011778	0		1.00003	0.952276	0.00043173	0.000372646	0.000431227	00:00:00	249815	2022-07-15			3.3377e+08	2022-02-10	0	1
2022-02-11	1.37756e+07	0		0	0.4	2.17643	5.3761	2.06633e+08	0.350262	2.5		0	2022-02-11	0.619079		1	8.51628e-08	2.41604e-07	0.6	0	1.44217e-08	1	0.380921	1.12971	301000	0.011778	0		1.00003	0.952302	0.000430998	0.00037177	0.000430491	00:00:00	249815	2022-07-15			3.33775e+08	2022-02-11	0	1
2022-02-12	1.37756e+07	0		0	0.4	2.14641	5.30178	2.06633e+08	0.345437	2.5		0	2022-02-12	0.619069		1	8.39045e-08	2.3826e-07	0.6	0	1.41047e-08	1	0.380931	1.12971	301300	0.011778	0		1.00003	0.952327	0.000430267	0.000370896	0.000429756	00:00:00	249815	2022-07-15			3.33781e+08	2022-02-12	0	1
2022-02-13	1.37756e+07	0		0	0.4	2.11682	5.22852	2.06633e+08	0.340681	2.5		0	2022-02-13	0.619059		1	8.26654e-08	2.34964e-07	0.6	0	1.37948e-08	1	0.380941	1.12971	301600	0.011778	0		1.00003	0.952352	0.000429537	0.000370024	0.000429023	00:00:00	249815	2022-07-15			3.33786e+08	2022-02-13	0	1
2022-02-14	1.37756e+07	0		0	0.4	2.08765	5.15631	2.06633e+08	0.335993	2.5		0	2022-02-14	0.619049		1	8.14454e-08	2.31715e-07	0.6	0	1.34918e-08	1	0.380951	1.12971	301900	0.011778	0		1.00003	0.952378	0.000428808	0.000369154	0.000428292	00:00:00	249815	2022-07-15			3.33792e+08	2022-02-14	0	1
2022-02-15	1.37756e+07	0		0	0.4	2.0589	5.08514	2.06633e+08	0.331372	2.5		0	2022-02-15	0.619039		1	8.0244e-08	2.28513e-07	0.6	0	1.31956e-08	1	0.380961	1.12971	302200	0.011778	0		1.00003	0.952403	0.000428081	0.000368286	0.000427562	00:00:00	249815	2022-07-15			3.33797e+08	2022-02-15	0	1
2022-02-16	1.37756e+07	0		0	0.4	2.03056	5.01499	2.06633e+08	0.326818	2.5		0	2022-02-16	0.619029		1	7.9061e-08	2.25357e-07	0.6	0	1.29059e-08	1	0.380971	1.12971	302500	0.011778	0		1.00003	0.952429	0.000427356	0.000367421	0.000426833	00:00:00	249815	2022-07-15			3.33803e+08	2022-02-16	0	1
2022-02-17	1.37756e+07	0		0	0.4	2.00263	4.94584	2.06633e+08	0.322328	2.5		0	2022-02-17	0.619018		1	7.78961e-08	2.22246e-07	0.6	0	1.26227e-08	1	0.380982	1.12971	302800	0.011778	0		1.00003	0.952454	0.000426632	0.000366558	0.000426105	00:00:00	249815	2022-07-15			3.33808e+08	2022-02-17	0	1
2022-02-18	1.37756e+07	0		0	0.4	1.97509	4.87769	2.06633e+08	0.317902	2.5		0	2022-02-18	0.619008		1	7.6749e-08	2.1918e-07	0.6	0	1.23457e-08	1	0.380992	1.12971	303100	0.011778	0		1.00003	0.952479	0.000425909	0.000365697	0.00042538	00:00:00	249815	2022-07-15			3.33814e+08	2022-02-18	0	1
2022-02-19	1.37756e+07	0		0	0.4	1.94795	4.81051	2.06633e+08	0.313539	2.5		0	2022-02-19	0.618998		1	7.56195e-08	2.16158e-07	0.6	0	1.2075e-08	1	0.381002	1.12971	303400	0.011778	0		1.00003	0.952505	0.000425188	0.000364838	0.000424655	00:00:00	249815	2022-07-15			3.33819e+08	2022-02-19	0	1
2022-02-20	1.37756e+07	0		0	0.4	1.9212	4.74429	2.06633e+08	0.309239	2.5		0	2022-02-20	0.618988		1	7.45072e-08	2.13179e-07	0.6	0	1.18102e-08	1	0.381012	1.12971	303700	0.011778	0		1.00003	0.95253	0.000424468	0.000363982	0.000423932	00:00:00	249815	2022-07-15			3.33825e+08	2022-02-20	0	1
2022-02-21	1.37756e+07	0		0	0.4	1.89483	4.67901	2.06633e+08	0.305	2.5		0	2022-02-21	0.618978		1	7.3412e-08	2.10242e-07	0.6	0	1.15514e-08	1	0.381022	1.12971	304000	0.011778	0		1.00003	0.952556	0.000423749	0.000363127	0.00042321	00:00:00	249815	2022-07-15			3.3383e+08	2022-02-21	0	1
2022-02-22	1.37756e+07	0		0	0.4	1.86883	4.61467	2.06633e+08	0.300821	2.5		0	2022-02-22	0.618968		1	7.23334e-08	2.07348e-07	0.6	0	1.12982e-08	1	0.381032	1.12971	304300	0.011778	0		1.00003	0.952581	0.000423032	0.000362275	0.00042249	00:00:00	249815	2022-07-15			3.33836e+08	2022-02-22	0	1
2022-02-23	1.37756e+07	0		0	0.4	1.8432	4.55125	2.06633e+08	0.296702	2.5		0	2022-02-23	0.618957		1	7.12713e-08	2.04495e-07	0.6	0	1.10507e-08	1	0.381043	1.12971	304600	0.011778	0		1.00003	0.952606	0.000422316	0.000361425	0.000421771	00:00:00	249815	2022-07-15			3.33841e+08	2022-02-23	0	1
2022-02-24	1.37756e+07	0		0	0.4	1.81794	4.48874	2.06633e+08	0.292641	2.5		0	2022-02-24	0.618947		1	7.02253e-08	2.01683e-07	0.6	0	1.08088e-08	1	0.381053	1.12971	304900	0.011778	0		1.00003	0.952632	0.000421601	0.000360577	0.000421053	00:00:00	249815	2022-07-15			3.33847e+08	2022-02-24	0	1
2022-02-25	1.37756e+07	0		0	0.4	1.79304	4.42711	2.06633e+08	0.288638	2.5		0	2022-02-25	0.618937		1	6.91953e-08	1.98911e-07	0.6	0	1.05721e-08	1	0.381063	1.12971	305200	0.011778	0		1.00003	0.952657	0.000420888	0.000359731	0.000420337	00:00:00	249815	2022-07-15			3.33852e+08	2022-02-25	0	1
2022-02-26	1.37756e+07	0		0	0.4	1.7685	4.36637	2.06633e+08	0.284692	2.5		0	2022-02-26	0.618927		1	6.8181e-08	1.96178e-07	0.6	0	1.03408e-08	1	0.381073	1.12971	305500	0.011778	0		1.00003	0.952683	0.000420176	0.000358887	0.000419622	00:00:00	249815	2022-07-15			3.33858e+08	2022-02-26	0	1
2022-02-27	1.37756e+07	0		0	0.4	1.7443	4.30649	2.06633e+08	0.280802	2.5		0	2022-02-27	0.618917		1	6.71822e-08	1.93485e-07	0.6	0	1.01145e-08	1	0.381083	1.12971	305800	0.011778	0		1.00003	0.952708	0.000419466	0.000358046	0.000418909	00:00:00	249815	2022-07-15			3.33863e+08	2022-02-27	0	1
2022-02-28	1.37756e+07	0		0	0.4	1.72044	4.24746	2.06633e+08	0.276968	2.5		0	2022-02-28	0.618907		1	6.61985e-08	1.90829e-07	0.6	0	9.8933e-09	1	0.381093	1.12971	306100	0.011778	0		1.00003	0.952733	0.000418757	0.000357207	0.000418197	00:00:00	249815	2022-07-15			3.33869e+08	2022-02-28	0	1
2022-03-01	1.37756e+07	0		0	0.4	1.69693	4.18928	2.06633e+08	0.273187	2.5		0	2022-03-01	0.618896		1	6.52298e-08	1.88212e-07	0.6	0	9.67698e-09	1	0.381104	1.12971	306400	0.011778	0		1.00003	0.952759	0.000418049	0.000356369	0.000417486	00:00:00	249815	2022-07-15			3.33874e+08	2022-03-01	0	1
2022-03-02	1.37756e+07	0		0	0.4	1.67375	4.13192	2.06633e+08	0.269461	2.5		0	2022-03-02	0.618886		1	6.42758e-08	1.85632e-07	0.6	0	9.46546e-09	1	0.381114	1.12971	306700	0.011778	0		1.00003	0.952784	0.000417343	0.000355534	0.000416776	00:00:00	249815	2022-07-15			3.3388e+08	2022-03-02	0	1
2022-03-03	1.37756e+07	0		0	0.4	1.6509	4.07538	2.06633e+08	0.265787	2.5		0	2022-03-03	0.618876		1	6.33363e-08	1.83089e-07	0.6	0	9.25862e-09	1	0.381124	1.12971	307000	0.011778	0		1.00003	0.95281	0.000416638	0.000354701	0.000416069	00:00:00	249815	2022-07-15			3.33885e+08	2022-03-03	0	1
2022-03-04	1.37756e+07	0		0	0.4	1.62837	4.01964	2.06633e+08	0.262165	2.5		0	2022-03-04	0.618866		1	6.24111e-08	1.80582e-07	0.6	0	9.05637e-09	1	0.381134	1.12971	307300	0.011778	0		1.00003	0.952835	0.000415935	0.00035387	0.000415362	00:00:00	249815	2022-07-15			3.33891e+08	2022-03-04	0	1
2022-03-05	1.37756e+07	0		0	0.4	1.60616	3.9647	2.06633e+08	0.258595	2.5		0	2022-03-05	0.618856		1	6.14999e-08	1.78111e-07	0.6	0	8.8586e-09	1	0.381144	1.12971	307600	0.011778	0		1.00003	0.95286	0.000415232	0.000353042	0.000414657	00:00:00	249815	2022-07-15			3.33896e+08	2022-03-05	0	1
2022-03-06	1.37756e+07	0		0	0.4	1.58427	3.91054	2.06633e+08	0.255075	2.5		0	2022-03-06	0.618846		1	6.06025e-08	1.75675e-07	0.6	0	8.6652e-09	1	0.381154	1.12971	307900	0.011778	0		1.00003	0.952886	0.000414531	0.000352215	0.000413953	00:00:00	249815	2022-07-15			3.33901e+08	2022-03-06	0	1
2022-03-07	1.37756e+07	0		0	0.4	1.56269	3.85714	2.06633e+08	0.251605	2.5		0	2022-03-07	0.618835		1	5.97187e-08	1.73273e-07	0.6	0	8.47608e-09	1	0.381165	1.12971	308200	0.011778	0		1.00003	0.952911	0.000413832	0.00035139	0.00041325	00:00:00	249815	2022-07-15			3.33907e+08	2022-03-07	0	1
2022-03-08	1.37756e+07	0		0	0.4	1.54141	3.8045	2.06633e+08	0.248184	2.5		0	2022-03-08	0.618825		1	5.88483e-08	1.70906e-07	0.6	0	8.29115e-09	1	0.381175	1.12971	308500	0.011778	0		1.00003	0.952937	0.000413134	0.000350568	0.000412549	00:00:00	249815	2022-07-15			3.33912e+08	2022-03-08	0	1
2022-03-09	1.37756e+07	0		0	0.4	1.52043	3.75261	2.06633e+08	0.244811	2.5		0	2022-03-09	0.618815		1	5.79911e-08	1.68572e-07	0.6	0	8.11031e-09	1	0.381185	1.12971	308800	0.011778	0		1.00003	0.952962	0.000412437	0.000349747	0.000411849	00:00:00	249815	2022-07-15			3.33918e+08	2022-03-09	0	1
2022-03-10	1.37756e+07	0		0	0.4	1.49976	3.70146	2.06633e+08	0.241486	2.5		0	2022-03-10	0.618805		1	5.71469e-08	1.66271e-07	0.6	0	7.93347e-09	1	0.381195	1.12971	309100	0.011778	0		1.00003	0.952987	0.000411741	0.000348929	0.000411151	00:00:00	249815	2022-07-15			3.33923e+08	2022-03-10	0	1
2022-03-11	1.37756e+07	0		0	0.4	1.47937	3.65103	2.06633e+08	0.238208	2.5		0	2022-03-11	0.618795		1	5.63154e-08	1.64003e-07	0.6	0	7.76054e-09	1	0.381205	1.12971	309400	0.011778	0		1.00003	0.953013	0.000411047	0.000348112	0.000410453	00:00:00	249815	2022-07-15			3.33929e+08	2022-03-11	0	1
2022-03-12	1.37756e+07	0		0	0.4	1.45927	3.60131	2.06634e+08	0.234976	2.5		0	2022-03-12	0.618785		1	5.54965e-08	1.61767e-07	0.6	0	7.59142e-09	1	0.381215	1.12971	309700	0.011778	0		1.00003	0.953038	0.000410354	0.000347298	0.000409758	00:00:00	249815	2022-07-15			3.33934e+08	2022-03-12	0	1
2022-03-13	1.37756e+07	0		0	0.4	1.43946	3.5523	2.06634e+08	0.23179	2.5		0	2022-03-13	0.618775		1	5.46899e-08	1.59563e-07	0.6	0	7.42605e-09	1	0.381225	1.12971	310000	0.011778	0		1.00003	0.953064	0.000409662	0.000346486	0.000409063	00:00:00	249815	2022-07-15			3.3394e+08	2022-03-13	0	1
2022-03-14	1.37756e+07	0		0	0.4	1.41992	3.50398	2.06634e+08	0.228649	2.5		0	2022-03-14	0.618764		1	5.38956e-08	1.5739e-07	0.6	0	7.26433e-09	1	0.381236	1.12971	310300	0.011778	0		1.00003	0.953089	0.000408972	0.000345676	0.00040837	00:00:00	249815	2022-07-15			3.33945e+08	2022-03-14	0	1
2022-03-15	1.37756e+07	0		0	0.4	1.40066	3.45634	2.06634e+08	0.225552	2.5		0	2022-03-15	0.618754		1	5.31132e-08	1.55248e-07	0.6	0	7.10617e-09	1	0.381246	1.12971	310600	0.011778	0		1.00003	0.953115	0.000408283	0.000344868	0.000407678	00:00:00	249815	2022-07-15			3.33951e+08	2022-03-15	0	1
2022-03-16	1.37756e+07	0		0	0.4	1.38167	3.40938	2.06634e+08	0.222498	2.5		0	2022-03-16	0.618744		1	5.23426e-08	1.53136e-07	0.6	0	6.95151e-09	1	0.381256	1.12971	310900	0.011778	0		1.00003	0.95314	0.000407595	0.000344062	0.000406988	00:00:00	249815	2022-07-15			3.33956e+08	2022-03-16	0	1
2022-03-17	1.37756e+07	0		0	0.4	1.36295	3.36308	2.06634e+08	0.219488	2.5		0	2022-03-17	0.618734		1	5.15837e-08	1.51054e-07	0.6	0	6.80026e-09	1	0.381266	1.12971	311200	0.011778	0		1.00003	0.953165	0.000406909	0.000343258	0.000406298	00:00:00	249815	2022-07-15			3.33962e+08	2022-03-17	0	1
2022-03-18	1.37756e+07	0		0	0.4	1.3445	3.31744	2.06634e+08	0.21652	2.5		0	2022-03-18	0.618724		1	5.08362e-08	1.49001e-07	0.6	0	6.65235e-09	1	0.381276	1.12971	311500	0.011778	0		1.00003	0.953191	0.000406224	0.000342455	0.000405611	00:00:00	249815	2022-07-15			3.33967e+08	2022-03-18	0	1
2022-03-19	1.37756e+07	0		0	0.4	1.3263	3.27244	2.06634e+08	0.213594	2.5		0	2022-03-19	0.618714		1	5.00999e-08	1.46978e-07	0.6	0	6.5077e-09	1	0.381286	1.12971	311800	0.011778	0		1.00003	0.953216	0.00040554	0.000341655	0.000404924	00:00:00	249815	2022-07-15			3.33973e+08	2022-03-19	0	1
2022-03-20	1.37756e+07	0		0	0.4	1.30836	3.22807	2.06634e+08	0.210708	2.5		0	2022-03-20	0.618703		1	4.93747e-08	1.44983e-07	0.6	0	6.36624e-09	1	0.381297	1.12971	312100	0.011778	0		1.00003	0.953242	0.000404858	0.000340857	0.000404239	00:00:00	249815	2022-07-15			3.33978e+08	2022-03-20	0	1
2022-03-21	1.37756e+07	0		0	0.4	1.29067	3.18433	2.06634e+08	0.207864	2.5		0	2022-03-21	0.618693		1	4.86604e-08	1.43016e-07	0.6	0	6.22789e-09	1	0.381307	1.12971	312400	0.011778	0		1.00003	0.953267	0.000404177	0.000340061	0.000403555	00:00:00	249815	2022-07-15			3.33984e+08	2022-03-21	0	1
2022-03-22	1.37756e+07	0		0	0.4	1.27323	3.1412	2.06634e+08	0.205059	2.5		0	2022-03-22	0.618683		1	4.79569e-08	1.41077e-07	0.6	0	6.0926e-09	1	0.381317	1.12971	312700	0.011778	0		1.00003	0.953292	0.000403497	0.000339267	0.000402872	00:00:00	249815	2022-07-15			3.33989e+08	2022-03-22	0	1
2022-03-23	1.37756e+07	0		0	0.4	1.25604	3.09869	2.06634e+08	0.202294	2.5		0	2022-03-23	0.618673		1	4.72639e-08	1.39165e-07	0.6	0	5.96028e-09	1	0.381347	1.12971	313000	0.011778	0		1.00008	0.953368	0.000402818	0.000338475	0.000402191	00:00:00	249815	2022-07-15			3.33995e+08	2022-03-23	10779	1
2022-03-24	1.37756e+07	0		0	0.4	1.2391	3.05678	2.06634e+08	0.199578	2.5		0	2022-03-24	0.618663		1	4.65818e-08	1.3728e-07	0.6	0	5.8309e-09	1	0.381376	1.12971	313300	0.011778	0		1.00008	0.953441	0.000402141	0.000337685	0.000401511	00:00:00	249815	2022-07-15			3.34e+08	2022-03-24	21049	1
2022-03-25	1.37756e+07	0		0	0.4	1.2224	3.01547	2.06634e+08	0.196901	2.5		0	2022-03-25	0.618653		1	4.59103e-08	1.35423e-07	0.6	0	5.70438e-09	1	0.381412	1.12971	313600	0.011778	0		1.00009	0.953531	0.000401465	0.000336897	0.000400832	00:00:00	249815	2022-07-15			3.34006e+08	2022-03-25	35036	1
2022-03-26	1.37756e+07	0		0	0.4	1.20596	2.97476	2.06634e+08	0.194267	2.5		0	2022-03-26	0.618642		1	4.52495e-08	1.33593e-07	0.6	0	5.58067e-09	1	0.381454	1.12971	313900	0.011778	0		1.00011	0.953634	0.00040079	0.000336111	0.000400155	00:00:00	249815	2022-07-15			3.34011e+08	2022-03-26	51952	1
2022-03-27	1.37756e+07	0		0	0.4	1.18977	2.93465	2.06634e+08	0.191675	2.5		0	2022-03-27	0.618632		1	4.45994e-08	1.31789e-07	0.6	0	5.45972e-09	1	0.381497	1.12971	314200	0.011778	0		1.00011	0.953743	0.000400117	0.000335327	0.000399478	00:00:00	249815	2022-07-15			3.34017e+08	2022-03-27	69917	1
2022-03-28	1.37756e+07	0		0	0.4	1.17384	2.89512	2.06634e+08	0.189123	2.5		0	2022-03-28	0.618622		1	4.396e-08	1.30012e-07	0.6	0	5.34147e-09	1	0.381543	1.12971	314500	0.011778	0		1.00012	0.953858	0.000399445	0.000334545	0.000398803	00:00:00	249815	2022-07-15			3.34022e+08	2022-03-28	89249	1
2022-03-29	1.37756e+07	0		0	0.4	1.15815	2.85618	2.06634e+08	0.186612	2.5		0	2022-03-29	0.618612		1	4.33314e-08	1.28261e-07	0.6	0	5.22587e-09	1	0.381587	1.12971	314800	0.011778	0		1.00012	0.953968	0.000398774	0.000333765	0.00039813	00:00:00	249815	2022-07-15			3.34028e+08	2022-03-29	107500	1
2022-03-30	1.37756e+07	0		0	0.4	1.14272	2.81782	2.06634e+08	0.18414	2.5		0	2022-03-30	0.618602		1	4.27131e-08	1.26536e-07	0.6	0	5.11287e-09	1	0.381638	1.12971	315100	0.011778	0		1.00013	0.954095	0.000398104	0.000332987	0.000397458	00:00:00	249815	2022-07-15			3.34033e+08	2022-03-30	129596	1
2022-03-31	1.37756e+07	0		0	0.4	1.12753	2.78004	2.06634e+08	0.18171	2.5		0	2022-03-31	0.618592		1	4.21052e-08	1.24838e-07	0.6	0	5.00241e-09	1	0.381695	1.12971	315400	0.011778	0		1.00015	0.954237	0.000397436	0.000332211	0.000396787	00:00:00	249815	2022-07-15			3.34039e+08	2022-03-31	154679	1
2022-04-01	1.37756e+07	0		0	0.4	1.11258	2.74285	2.06634e+08	0.179321	2.5		0	2022-04-01	0.618581		1	4.15077e-08	1.23165e-07	0.6	0	4.89446e-09	1	0.381755	1.12971	315700	0.011778	0		1.00016	0.954387	0.000396769	0.000331436	0.000396117	00:00:00	249815	2022-07-15			3.34044e+08	2022-04-01	181644	1
2022-04-02	1.37756e+07	0		0	0.4	1.09788	2.70622	2.06634e+08	0.176972	2.5		0	2022-04-02	0.618571		1	4.09203e-08	1.21519e-07	0.6	0	4.78896e-09	1	0.381819	1.12971	316000	0.011778	0		1.00017	0.954549	0.000396103	0.000330664	0.000395448	00:00:00	249815	2022-07-15			3.3405e+08	2022-04-02	211179	1
2022-04-03	1.37756e+07	0		0	0.4	1.08342	2.67018	2.06634e+08	0.174663	2.5		0	2022-04-03	0.618561		1	4.0343e-08	1.19898e-07	0.6	0	4.68587e-09	1	0.381889	1.12971	316300	0.011778	0		1.00018	0.954722	0.000395439	0.000329893	0.000394781	00:00:00	249815	2022-07-15			3.34055e+08	2022-04-03	243179	1
2022-04-04	1.37756e+07	0		0	0.4	1.0692	2.63471	2.06634e+08	0.172394	2.5		0	2022-04-04	0.618551		1	3.97759e-08	1.18304e-07	0.6	0	4.58516e-09	1	0.381963	1.12971	316600	0.011778	0		1.00019	0.954907	0.000394775	0.000329125	0.000394115	00:00:00	249815	2022-07-15			3.34061e+08	2022-04-04	277679	1
2022-04-05	1.37756e+07	0		0	0.4	1.05523	2.59981	2.06634e+08	0.170165	2.5		0	2022-04-05	0.618541		1	3.92188e-08	1.16735e-07	0.6	0	4.48676e-09	1	0.382021	1.12971	316900	0.011778	0		1.00015	0.955052	0.000394113	0.000328358	0.000393451	00:00:00	249815	2022-07-15			3.34066e+08	2022-04-05	303506	1
2022-04-06	1.37756e+07	0		0	0.4	1.04148	2.56549	2.06634e+08	0.167966	2.5		0	2022-04-06	0.618531		1	3.86713e-08	1.15192e-07	0.6	0	4.39065e-09	1	0.382082	1.12971	317200	0.011778	0		1.00016	0.955205	0.000393453	0.000327594	0.000392787	00:00:00	249815	2022-07-15			3.34072e+08	2022-04-06	331207	1
2022-04-07	1.37756e+07	0		0	0.4	1.02796	2.53171	2.06634e+08	0.165805	2.5		0	2022-04-07	0.618521		1	3.81334e-08	1.13673e-07	0.6	0	4.29674e-09	1	0.382149	1.12971	317500	0.011778	0		1.00018	0.955373	0.000392793	0.000326831	0.000392125	00:00:00	249815	2022-07-15			3.34077e+08	2022-04-07	362179	1
2022-04-08	1.37756e+07	0		0	0.4	1.01467	2.49849	2.06634e+08	0.163682	2.5		0	2022-04-08	0.61851		1	3.76048e-08	1.1218e-07	0.6	0	4.20502e-09	1	0.382218	1.12971	317800	0.011778	0		1.00018	0.955545	0.000392135	0.00032607	0.000391464	00:00:00	249815	2022-07-15			3.34083e+08	2022-04-08	393838	1
2022-04-09	1.37756e+07	0		0	0.4	1.00161	2.46582	2.06634e+08	0.161594	2.5		0	2022-04-09	0.6185		1	3.70855e-08	1.10711e-07	0.6	0	4.11541e-09	1	0.382302	1.12971	318100	0.011778	0		1.00022	0.955754	0.000391478	0.000325311	0.000390804	00:00:00	249815	2022-07-15			3.34088e+08	2022-04-09	433725	1
2022-04-10	1.37756e+07	0		0	0.4	0.988759	2.4337	2.06634e+08	0.159548	2.5		0	2022-04-10	0.61849		1	3.65754e-08	1.09267e-07	0.6	0	4.0279e-09	1	0.382377	1.12971	318400	0.011778	0		1.0002	0.955943	0.000390822	0.000324554	0.000390146	00:00:00	249815	2022-07-15			3.34094e+08	2022-04-10	469179	1
2022-04-11	1.37756e+07	0		0	0.4	0.976128	2.40211	2.06634e+08	0.157533	2.5		0	2022-04-11	0.61848		1	3.60741e-08	1.07847e-07	0.6	0	3.94242e-09	1	0.382441	1.12971	318700	0.011778	0		1.00017	0.956104	0.000390167	0.000323799	0.000389489	00:00:00	249815	2022-07-15			3.34099e+08	2022-04-11	498436	1
2022-04-12	1.37756e+07	0		0	0.4	0.963708	2.37104	2.06634e+08	0.155547	2.5		0	2022-04-12	0.61847		1	3.55816e-08	1.0645e-07	0.6	0	3.85892e-09	1	0.382505	1.12971	319000	0.011778	0		1.00017	0.956263	0.000389514	0.000323046	0.000388833	00:00:00	249815	2022-07-15			3.34105e+08	2022-04-12	527581	1
2022-04-13	1.37756e+07	0		0	0.4	0.951497	2.34049	2.06634e+08	0.153593	2.5		0	2022-04-13	0.61846		1	3.50978e-08	1.05077e-07	0.6	0	3.77736e-09	1	0.382561	1.12971	319300	0.011778	0		1.00015	0.956404	0.000388862	0.000322294	0.000388178	00:00:00	249815	2022-07-15			3.3411e+08	2022-04-13	552469	1
2022-04-14	1.37756e+07	0		0	0.4	0.939484	2.31045	2.06634e+08	0.151669	2.5		0	2022-04-14	0.618449		1	3.46221e-08	1.03727e-07	0.6	0	3.6977e-09	1	0.38262	1.12971	319600	0.011778	0		1.00015	0.956551	0.000388211	0.000321545	0.000387525	00:00:00	249815	2022-07-15			3.34116e+08	2022-04-14	578924	1
2022-04-15	1.37756e+07	0		0	0.4	0.927667	2.28091	2.06634e+08	0.149777	2.5		0	2022-04-15	0.618439		1	3.41546e-08	1.02399e-07	0.6	0	3.61987e-09	1	0.38269	1.12971	319900	0.011778	0		1.00018	0.956725	0.000387561	0.000320797	0.000386873	00:00:00	249815	2022-07-15			3.34121e+08	2022-04-15	611204	1
2022-04-16	1.37756e+07	0		0	0.4	0.91604	2.25186	2.06634e+08	0.14792	2.5		0	2022-04-16	0.618429		1	3.36949e-08	1.01093e-07	0.6	0	3.54384e-09	1	0.38276	1.12971	320200	0.011778	0		1.00018	0.956899	0.000386913	0.000320051	0.000386222	00:00:00	249815	2022-07-15			3.34127e+08	2022-04-16	643518	1
2022-04-17	1.37756e+07	0		0	0.4	0.9046	2.22329	2.06634e+08	0.146093	2.5		0	2022-04-17	0.618419		1	3.32429e-08	9.98087e-08	0.6	0	3.46957e-09	1	0.38283	1.12971	320500	0.011778	0		1.00018	0.957076	0.000386266	0.000319307	0.000385572	00:00:00	249815	2022-07-15			3.34132e+08	2022-04-17	676380	1
2022-04-18	1.37756e+07	0		0	0.4	0.893348	2.19519	2.06634e+08	0.144295	2.5		0	2022-04-18	0.618409		1	3.27988e-08	9.85457e-08	0.6	0	3.39701e-09	1	0.382892	1.12971	320800	0.011778	0		1.00016	0.95723	0.00038562	0.000318565	0.000384924	00:00:00	249815	2022-07-15			3.34138e+08	2022-04-18	704202	1
2022-04-19	1.37756e+07	0		0	0.4	0.882278	2.16755	2.06634e+08	0.142523	2.5		0	2022-04-19	0.618399		1	3.23621e-08	9.73032e-08	0.6	0	3.32611e-09	1	0.382952	1.12971	321100	0.011778	0		1.00016	0.95738	0.000384975	0.000317825	0.000384276	00:00:00	249815	2022-07-15			3.34143e+08	2022-04-19	731444	1
2022-04-20	1.37756e+07	0		0	0.4	0.871388	2.14036	2.06634e+08	0.140779	2.5		0	2022-04-20	0.618388		1	3.19328e-08	9.60812e-08	0.6	0	3.25684e-09	1	0.383015	1.12971	321400	0.011778	0		1.00016	0.957537	0.000384331	0.000317087	0.00038363	00:00:00	249815	2022-07-15			3.34149e+08	2022-04-20	759938	1
2022-04-21	1.37756e+07	0		0	0.4	0.860675	2.11362	2.06634e+08	0.139064	2.5		0	2022-04-21	0.618378		1	3.15108e-08	9.48792e-08	0.6	0	3.18915e-09	1	0.383068	1.12971	321700	0.011778	0		1.00014	0.957671	0.000383689	0.00031635	0.000382985	00:00:00	249815	2022-07-15			3.34154e+08	2022-04-21	783564	1
2022-04-22	1.37756e+07	0		0	0.4	0.850129	2.08731	2.06634e+08	0.137374	2.5		0	2022-04-22	0.618368		1	3.10957e-08	9.36968e-08	0.6	0	3.12301e-09	1	0.383139	1.12971	322000	0.011778	0		1.00018	0.957846	0.000383048	0.000315616	0.000382342	00:00:00	249815	2022-07-15			3.3416e+08	2022-04-22	816173	1
2022-04-23	1.37756e+07	0		0	0.4	0.839752	2.06143	2.06634e+08	0.135715	2.5		0	2022-04-23	0.618358		1	3.06875e-08	9.25336e-08	0.6	0	3.05837e-09	1	0.383205	1.12971	322300	0.011778	0		1.00017	0.958012	0.000382408	0.000314883	0.000381699	00:00:00	249815	2022-07-15			3.34165e+08	2022-04-23	846609	1
2022-04-24	1.37756e+07	0		0	0.4	0.829538	2.03597	2.06634e+08	0.134082	2.5		0	2022-04-24	0.618348		1	3.02861e-08	9.13889e-08	0.6	0	2.9952e-09	1	0.383299	1.12971	322600	0.011778	0		1.00025	0.958247	0.000381769	0.000314152	0.000381058	00:00:00	249815	2022-07-15			3.34171e+08	2022-04-24	892217	1
2022-04-25	1.37756e+07	0		0	0.4	0.819499	2.01092	2.06634e+08	0.132484	2.5		0	2022-04-25	0.618338		1	2.98918e-08	9.02631e-08	0.6	0	2.93346e-09	1	0.383374	1.12971	322900	0.011778	0		1.0002	0.958435	0.000381131	0.000313422	0.000380418	00:00:00	249815	2022-07-15			3.34176e+08	2022-04-25	927704	1
2022-04-26	1.37756e+07	0		0	0.4	0.809626	1.98628	2.06634e+08	0.130906	2.5		0	2022-04-26	0.618327		1	2.95042e-08	8.91556e-08	0.6	0	2.87313e-09	1	0.383434	1.12971	323200	0.011778	0		1.00015	0.958584	0.000380495	0.000312695	0.000379779	00:00:00	249815	2022-07-15			3.34182e+08	2022-04-26	954501	1
2022-04-27	1.37756e+07	0		0	0.4	0.79991	1.96203	2.06634e+08	0.129349	2.5		0	2022-04-27	0.618317		1	2.91231e-08	8.80659e-08	0.6	0	2.81417e-09	1	0.383486	1.12971	323500	0.011778	0		1.00014	0.958715	0.00037986	0.000311969	0.000379142	00:00:00	249815	2022-07-15			3.34187e+08	2022-04-27	977535	1
2022-04-28	1.37756e+07	0		0	0.4	0.790351	1.93818	2.06634e+08	0.127814	2.5		0	2022-04-28	0.618307		1	2.87484e-08	8.69938e-08	0.6	0	2.75653e-09	1	0.383543	1.12971	323800	0.011778	0		1.00015	0.958857	0.000379226	0.000311245	0.000378505	00:00:00	249815	2022-07-15			3.34193e+08	2022-04-28	1002944	1
2022-04-29	1.37756e+07	0		0	0.4	0.780941	1.91471	2.06634e+08	0.126306	2.5		0	2022-04-29	0.618297		1	2.83799e-08	8.59388e-08	0.6	0	2.7002e-09	1	0.383605	1.12971	324100	0.011778	0		1.00016	0.959013	0.000378593	0.000310523	0.00037787	00:00:00	249815	2022-07-15			3.34198e+08	2022-04-29	1031373	1
2022-04-30	1.37756e+07	0		0	0.4	0.771681	1.89161	2.06634e+08	0.124822	2.5		0	2022-04-30	0.618287		1	2.80174e-08	8.49007e-08	0.6	0	2.64512e-09	1	0.383671	1.12971	324400	0.011778	0		1.00017	0.959178	0.000377962	0.000309803	0.000377236	00:00:00	249815	2022-07-15			3.34203e+08	2022-04-30	1061643	1
2022-05-01	1.37756e+07	0		0	0.4	0.750224	1.85654	2.06634e+08	0.111027	2.5		0	2022-05-01	0.618277		1	2.72132e-08	8.33255e-08	0.555556	0	2.57514e-09	1	0.383746	1.12971	324700	0.011778	0		1.0002	0.959366	0.000377331	0.000309085	0.000376603	00:00:00	249815	2022-07-15			3.34209e+08	2022-05-01	1097061	0.9
2022-05-02	1.37756e+07	0		0	0.4	0.727279	1.82021	2.06634e+08	0.107961	2.5		0	2022-05-02	0.618267		1	2.63566e-08	8.16934e-08	0.555556	0	2.50443e-09	1	0.383813	1.12971	325000	0.011778	0		1.00017	0.959533	0.000376702	0.000308368	0.000375972	00:00:00	249815	2022-07-15			3.34214e+08	2022-05-02	1127953	0.9
2022-05-03	1.37756e+07	0		0	0.4	0.702607	1.78236	2.06634e+08	0.104677	2.5		0	2022-05-03	0.618256		1	2.5439e-08	7.99935e-08	0.555556	0	2.43268e-09	1	0.38387	1.12971	325300	0.011778	0		1.00015	0.959674	0.000376074	0.000307653	0.000375341	00:00:00	249815	2022-07-15			3.3422e+08	2022-05-03	1153252	0.9
2022-05-04	1.37756e+07	0		0	0.4	0.675934	1.74272	2.06634e+08	0.101141	2.5		0	2022-05-04	0.618246		1	2.44507e-08	7.82132e-08	0.555556	0	2.35957e-09	1	0.383924	1.12971	325600	0.011778	0		1.00014	0.95981	0.000375447	0.00030694	0.000374712	00:00:00	249815	2022-07-15			3.34225e+08	2022-05-04	1177446	0.9
2022-05-05	1.37756e+07	0		0	0.4	0.646943	1.70097	2.06634e+08	0.0973152	2.5		0	2022-05-05	0.618236		1	2.33804e-08	7.63382e-08	0.555556	0	2.28468e-09	1	0.383982	1.12971	325900	0.011778	0		1.00015	0.959954	0.000374821	0.000306229	0.000374084	00:00:00	249815	2022-07-15			3.34231e+08	2022-05-05	1203320	0.9
2022-05-06	1.37756e+07	0		0	0.4	0.615277	1.65676	2.06634e+08	0.0931554	2.5		0	2022-05-06	0.618226		1	2.22156e-08	7.43525e-08	0.555556	0	2.2076e-09	1	0.384041	1.12971	326200	0.011778	0		1.00016	0.960103	0.000374197	0.000305519	0.000373457	00:00:00	249815	2022-07-15			3.34236e+08	2022-05-06	1230271	0.9
2022-05-07	1.37756e+07	0		0	0.4	0.592859	1.60965	2.06634e+08	0.0886094	2.5		0	2022-05-07	0.618216		1	2.13865e-08	7.22373e-08	0.555556	0	2.12782e-09	1	0.384106	1.12971	326500	0.011778	0		1.00017	0.960264	0.000373573	0.000304811	0.000372832	00:00:00	249815	2022-07-15			3.34242e+08	2022-05-07	1259802	0.9
2022-05-08	1.37756e+07	0		0	0.4	0.570293	1.56096	2.06634e+08	0.0853952	2.5		0	2022-05-08	0.618206		1	2.05536e-08	7.00512e-08	0.555556	0	2.04703e-09	1	0.384169	1.12971	326800	0.011778	0		1.00016	0.960422	0.000372951	0.000304105	0.000372207	00:00:00	249815	2022-07-15			3.34247e+08	2022-05-08	1288676	0.9
2022-05-09	1.37756e+07	0		0	0.4	0.547775	1.51064	2.06634e+08	0.0821583	2.5		0	2022-05-09	0.618195		1	1.97239e-08	6.77916e-08	0.555556	0	1.96519e-09	1	0.384226	1.12971	327100	0.011778	0		1.00015	0.960565	0.00037233	0.000303401	0.000371584	00:00:00	249815	2022-07-15			3.34253e+08	2022-05-09	1314488	0.9
2022-05-10	1.37756e+07	0		0	0.4	0.52556	1.45866	2.06634e+08	0.078926	2.5		0	2022-05-10	0.618185		1	1.89066e-08	6.54579e-08	0.555556	0	1.88228e-09	1	0.384273	1.12971	327400	0.011778	0		1.00012	0.960683	0.00037171	0.000302698	0.000370961	00:00:00	249815	2022-07-15			3.34258e+08	2022-05-10	1334585	0.9
2022-05-11	1.37756e+07	0		0	0.4	0.503979	1.40504	2.06634e+08	0.0757344	2.5		0	2022-05-11	0.618175		1	1.81137e-08	6.30509e-08	0.555556	0	1.79835e-09	1	0.384314	1.12971	327700	0.011778	0		1.00011	0.960784	0.000371091	0.000301998	0.00037034	00:00:00	249815	2022-07-15			3.34264e+08	2022-05-11	1351212	0.9
2022-05-12	1.37756e+07	0		0	0.4	0.483456	1.34986	2.06634e+08	0.0726322	2.5		0	2022-05-12	0.618165		1	1.73602e-08	6.05736e-08	0.555556	0	1.71349e-09	1	0.384369	1.12971	328000	0.011778	0		1.00014	0.960922	0.000370474	0.000301298	0.000369721	00:00:00	249815	2022-07-15			3.34269e+08	2022-05-12	1375815	0.9
2022-05-13	1.37756e+07	0		0	0.4	0.464531	1.29324	2.06634e+08	0.0696845	2.5		0	2022-05-13	0.618155		1	1.66654e-08	5.80318e-08	0.555556	0	1.62788e-09	1	0.384419	1.12971	328300	0.011778	0		1.00013	0.961047	0.000369857	0.000300601	0.000369102	00:00:00	249815	2022-07-15			3.34275e+08	2022-05-13	1397527	0.9
2022-05-14	1.37756e+07	0		0	0.4	0.446101	1.23538	2.06634e+08	0.0669654	2.5		0	2022-05-14	0.618145		1	1.59896e-08	5.54347e-08	0.555556	0	1.54176e-09	1	0.384473	1.12971	328600	0.011778	0		1.00014	0.961182	0.000369242	0.000299905	0.000368484	00:00:00	249815	2022-07-15			3.3428e+08	2022-05-14	1421509	0.9
2022-05-15	1.37756e+07	0		0	0.4	0.42826	1.18867	2.06634e+08	0.0643176	2.5		0	2022-05-15	0.618134		1	1.53361e-08	5.33378e-08	0.555556	0	1.47137e-09	1	0.384537	1.12971	328900	0.011778	0		1.00017	0.961343	0.000368628	0.000299211	0.000367868	00:00:00	249815	2022-07-15			3.34286e+08	2022-05-15	1451173	0.9
2022-05-16	1.37756e+07	0		0	0.4	0.41109	1.14247	2.06634e+08	0.0617557	2.5		0	2022-05-16	0.618124		1	1.47078e-08	5.12637e-08	0.555556	0	1.40255e-09	1	0.384591	1.12971	329200	0.011778	0		1.00014	0.961477	0.000368015	0.000298519	0.000367253	00:00:00	249815	2022-07-15			3.34291e+08	2022-05-16	1474952	0.9
2022-05-17	1.37756e+07	0		0	0.4	0.394644	1.09708	2.06634e+08	0.059288	2.5		0	2022-05-17	0.618114		1	1.41065e-08	4.92262e-08	0.555556	0	1.26771e-09	1	0.384638	1.12971	329500	0.011778	0		1.00012	0.961594	0.000367403	0.000297829	0.000366639	00:00:00	249815	2022-07-15			3.34297e+08	2022-05-17	1494843	0.9
2022-05-18	1.37756e+07	0		0	0.4	0.378934	1.05286	2.06634e+08	0.056923	2.5		0	2022-05-18	0.618104		1	1.35327e-08	4.72414e-08	0.555556	0	1.13849e-09	1	0.384689	1.12971	329800	0.011778	0		1.00013	0.961723	0.000366792	0.00029714	0.000366026	00:00:00	249815	2022-07-15			3.34302e+08	2022-05-18	1517473	0.9
2022-05-19	1.37756e+07	0		0	0.4	0.363914	1.01021	2.06634e+08	0.0546644	2.5		0	2022-05-19	0.618094		1	1.29845e-08	4.53269e-08	0.555556	0	1.01519e-09	1	0.384736	1.12971	330100	0.011778	0		1.00012	0.961841	0.000366182	0.000296453	0.000365414	00:00:00	249815	2022-07-15			3.34308e+08	2022-05-19	1537762	0.9
2022-05-20	1.37756e+07	0		0	0.4	0.349453	0.969558	2.06634e+08	0.0525041	2.5		0	2022-05-20	0.618084		1	1.24572e-08	4.35022e-08	0.555556	0	8.98149e-10	1	0.384787	1.12971	330400	0.011778	0		1.00013	0.961967	0.000365574	0.000295767	0.000364803	00:00:00	249815	2022-07-15			3.34313e+08	2022-05-20	1559902	0.9
2022-05-21	1.37756e+07	0		0	0.4	0.33556	0.931373	2.06634e+08	0.0504244	2.5		0	2022-05-21	0.618074		1	1.19511e-08	4.17882e-08	0.555556	0	7.87767e-10	1	0.384848	1.12971	330700	0.011778	0		1.00016	0.962119	0.000364967	0.000295084	0.000364194	00:00:00	249815	2022-07-15			3.34319e+08	2022-05-21	1587636	0.9
2022-05-22	1.37756e+07	0		0	0.4	0.322231	0.894405	2.06634e+08	0.0484273	2.5		0	2022-05-22	0.618063		1	1.1466e-08	4.01289e-08	0.555556	0	6.82259e-10	1	0.384898	1.12971	331000	0.011778	0		1.00013	0.962244	0.00036436	0.000294402	0.000363585	00:00:00	249815	2022-07-15			3.34324e+08	2022-05-22	1.60933e+06	0.9
2022-05-23	1.37756e+07	0		0	0.4	0.309453	0.858757	2.06634e+08	0.0465098	2.5		0	2022-05-23	0.618053		1	1.10013e-08	3.85289e-08	0.555556	0	5.81585e-10	1	0.384948	1.12971	331300	0.011778	0		1.00013	0.96237	0.000363755	0.000293721	0.000362978	00:00:00	249815	2022-07-15			3.3433e+08	2022-05-23	1.63142e+06	0.9
2022-05-24	1.37756e+07	0		0	0.4	0.297201	0.824502	2.06634e+08	0.0446712	2.5		0	2022-05-24	0.618043		1	1.05562e-08	3.69914e-08	0.555556	0	4.85673e-10	1	0.385	1.12971	331600	0.011778	0		1.00014	0.962501	0.000363151	0.000293042	0.000362372	00:00:00	249815	2022-07-15			3.34335e+08	2022-05-24	1.65443e+06	0.9
2022-05-25	1.37756e+07	0		0	0.4	0.285445	0.791676	2.06634e+08	0.0429085	2.5		0	2022-05-25	0.618033		1	1.01295e-08	3.55181e-08	0.555556	0	3.94406e-10	1	0.385053	1.12971	331900	0.011778	0		1.00014	0.962633	0.000362548	0.000292365	0.000361767	00:00:00	249815	2022-07-15			3.34341e+08	2022-05-25	1.67789e+06	0.9
2022-05-26	1.37756e+07	0		0	0.4	0.274158	0.760261	2.06634e+08	0.0412168	2.5		0	2022-05-26	0.618023		1	9.72013e-09	3.41081e-08	0.555556	0	3.0761e-10	1	0.385108	1.12971	332200	0.011778	0		1.00014	0.96277	0.000361947	0.00029169	0.000361163	00:00:00	249815	2022-07-15			3.34346e+08	2022-05-26	1.70232e+06	0.9
2022-05-27	1.37756e+07	0		0	0.4	0.263326	0.730169	2.06634e+08	0.0395927	2.5		0	2022-05-27	0.618013		1	9.32768e-09	3.27575e-08	0.555556	0	2.25032e-10	1	0.385164	1.12971	332500	0.011778	0		1.00015	0.96291	0.000361346	0.000291016	0.00036056	00:00:00	249815	2022-07-15			3.34352e+08	2022-05-27	1.72749e+06	0.9
2022-05-28	1.37756e+07	0		0	0.4	0.252933	0.701238	2.06634e+08	0.0380339	2.5		0	2022-05-28	0.618002		1	8.95144e-09	3.1459e-08	0.555556	0	1.46333e-10	1	0.38522	1.12971	332800	0.011778	0		1.00014	0.96305	0.000360747	0.000290344	0.000359959	00:00:00	249815	2022-07-15			3.34357e+08	2022-05-28	1.75248e+06	0.9
2022-05-29	1.37756e+07	0		0	0.4	0.242961	0.673458	2.06634e+08	0.036538	2.5		0	2022-05-29	0.617992		1	8.59079e-09	3.02123e-08	0.555556	0	7.13735e-11	1	0.385277	1.12971	333100	0.011778	0		1.00015	0.963193	0.000360148	0.000289674	0.000359358	00:00:00	249815	2022-07-15			3.34363e+08	2022-05-29	1.77832e+06	0.9
2022-05-30	1.37756e+07	0		0	0.4	0.233393	0.646805	2.06634e+08	0.0351028	2.5		0	2022-05-30	0.617982		1	8.24504e-09	2.90161e-08	0.555556	0	0	1	0.385336	1.12971	333400	0.011778	0		1.00015	0.96334	0.000359551	0.000289005	0.000358759	00:00:00	249815	2022-07-15			3.34368e+08	2022-05-30	1.80505e+06	0.9
2022-05-31	1.37756e+07	0		0	0.4	0.22421	0.621242	2.06634e+08	0.0337255	2.5		0	2022-05-31	0.617972		1	7.91351e-09	2.78689e-08	0.555556	0	0	1	0.385397	1.12971	333700	0.011778	0		1.00016	0.963491	0.000358955	0.000288338	0.000358161	00:00:00	249815	2022-07-15			3.34374e+08	2022-05-31	1.83264e+06	0.9
2022-06-01	1.37756e+07	0		0	0.4	0.211796	0.593123	2.06634e+08	0.0288032	2.5		0	2022-06-01	0.617962		1	7.46866e-09	2.6607e-08	0.5	0	0	1	0.385453	1.12971	334000	0.011778	0		1.00015	0.963632	0.00035836	0.000287673	0.000357564	00:00:00	249815	2022-07-15			3.34379e+08	2022-06-01	1.85798e+06	0.8
2022-06-02	1.37756e+07	0		0	0.4	0.199416	0.565671	2.06634e+08	0.0272125	2.5		0	2022-06-02	0.617952		1	7.02578e-09	2.53751e-08	0.5	0	0	1	0.38551	1.12971	334300	0.011778	0		1.00015	0.963774	0.000357766	0.000287009	0.000356968	00:00:00	249815	2022-07-15			3.34385e+08	2022-06-02	1.88359e+06	0.8
2022-06-03	1.37756e+07	0		0	0.4	0.187008	0.538792	2.06634e+08	0.0256256	2.5		0	2022-06-03	0.617941		1	6.5827e-09	2.4169e-08	0.5	0	0	1	0.385567	1.12971	334600	0.011778	0		1.00015	0.963917	0.000357173	0.000286347	0.000356373	00:00:00	249815	2022-07-15			3.3439e+08	2022-06-03	1.90938e+06	0.8
2022-06-04	1.37756e+07	0		0	0.4	0.174504	0.512402	2.06634e+08	0.0240346	2.5		0	2022-06-04	0.617931		1	6.13708e-09	2.29848e-08	0.5	0	0	1	0.385624	1.12971	334900	0.011778	0		1.00015	0.964061	0.000356581	0.000285686	0.000355779	00:00:00	249815	2022-07-15			3.34396e+08	2022-06-04	1.93538e+06	0.8
2022-06-05	1.37756e+07	0		0	0.4	0.161832	0.486406	2.06634e+08	0.022431	2.5		0	2022-06-05	0.617921		1	5.68634e-09	2.18184e-08	0.5	0	0	1	0.385682	1.12971	335200	0.011778	0		1.00015	0.964206	0.00035599	0.000285027	0.000355186	00:00:00	249815	2022-07-15			3.34401e+08	2022-06-05	1.96148e+06	0.8
2022-06-06	1.37756e+07	0		0	0.4	0.148912	0.460702	2.06634e+08	0.0208053	2.5		0	2022-06-06	0.617911		1	5.22768e-09	2.0665e-08	0.5	0	0	1	0.38574	1.12971	335500	0.011778	0		1.00015	0.96435	0.000355401	0.00028437	0.000354594	00:00:00	249815	2022-07-15			3.34407e+08	2022-06-06	1.98752e+06	0.8
2022-06-07	1.37756e+07	0		0	0.4	0.139256	0.435178	2.06634e+08	0.0191471	2.5		0	2022-06-07	0.617901		1	4.88433e-09	1.95198e-08	0.5	0	0	1	0.385797	1.12971	335800	0.011778	0		1.00015	0.964493	0.000354812	0.000283714	0.000354004	00:00:00	249815	2022-07-15			3.34412e+08	2022-06-07	2.01335e+06	0.8
2022-06-08	1.37756e+07	0		0	0.4	0.129952	0.410177	2.06634e+08	0.0179082	2.5		0	2022-06-08	0.617891		1	4.55392e-09	1.83981e-08	0.5	0	0	1	0.385854	1.12971	336100	0.011778	0		1.00015	0.964636	0.000354225	0.00028306	0.000353415	00:00:00	249815	2022-07-15			3.34418e+08	2022-06-08	2.0393e+06	0.8
2022-06-09	1.37756e+07	0		0	0.4	0.12104	0.385675	2.06634e+08	0.0167142	2.5		0	2022-06-09	0.617881		1	4.23785e-09	1.72988e-08	0.5	0	0	1	0.385912	1.12971	336400	0.011778	0		1.00015	0.96478	0.000353638	0.000282408	0.000352826	00:00:00	249815	2022-07-15			3.34423e+08	2022-06-09	2.06532e+06	0.8
2022-06-10	1.37756e+07	0		0	0.4	0.112576	0.361652	2.06634e+08	0.0155703	2.5		0	2022-06-10	0.61787		1	3.93799e-09	1.6221e-08	0.5	0	0	1	0.38597	1.12971	336700	0.011778	0		1.00015	0.964924	0.000353053	0.000281757	0.000352239	00:00:00	249815	2022-07-15			3.34429e+08	2022-06-10	2.0914e+06	0.8
2022-06-11	1.37756e+07	0		0	0.4	0.104629	0.338102	2.06634e+08	0.0144837	2.5		0	2022-06-11	0.61786		1	3.65672e-09	1.51645e-08	0.5	0	0	1	0.386027	1.12971	337000	0.011778	0		1.00015	0.965068	0.000352469	0.000281108	0.000351653	00:00:00	249815	2022-07-15			3.34434e+08	2022-06-11	2.1175e+06	0.8
2022-06-12	1.37756e+07	0		0	0.4	0.0972867	0.315027	2.06634e+08	0.0134632	2.5		0	2022-06-12	0.61785		1	3.3971e-09	1.41293e-08	0.5	0	0	1	0.386085	1.12971	337300	0.011778	0		1.00015	0.965212	0.000351886	0.00028046	0.000351068	00:00:00	249815	2022-07-15			3.3444e+08	2022-06-12	2.14361e+06	0.8
2022-06-13	1.37756e+07	0		0	0.4	0.0906598	0.292445	2.06634e+08	0.0125203	2.5		0	2022-06-13	0.61784		1	3.16289e-09	1.31163e-08	0.5	0	0	1	0.386142	1.12971	337600	0.011778	0		1.00015	0.965356	0.000351304	0.000279814	0.000350484	00:00:00	249815	2022-07-15			3.34445e+08	2022-06-13	2.16972e+06	0.8
2022-06-14	1.37756e+07	0		0	0.4	0.0844208	0.270388	2.06634e+08	0.0116692	2.5		0	2022-06-14	0.61783		1	2.94261e-09	1.21268e-08	0.5	0	0	1	0.3862	1.12971	337900	0.011778	0		1.00015	0.965501	0.000350723	0.000279169	0.000349901	00:00:00	249815	2022-07-15			3.34451e+08	2022-06-14	2.19587e+06	0.8
2022-06-15	1.37756e+07	0		0	0.4	0.0785745	0.252453	2.06634e+08	0.0108678	2.5		0	2022-06-15	0.61782		1	2.7364e-09	1.13222e-08	0.5	0	0	1	0.386259	1.12971	338200	0.011778	0		1.00015	0.965648	0.000350143	0.000278526	0.000349319	00:00:00	249815	2022-07-15			3.34456e+08	2022-06-15	2.2227e+06	0.8
2022-06-16	1.37756e+07	0		0	0.4	0.0731208	0.235357	2.06634e+08	0.0101167	2.5		0	2022-06-16	0.617809		1	2.54421e-09	1.05553e-08	0.5	0	0	1	0.386319	1.12971	338500	0.011778	0		1.00015	0.965796	0.000349564	0.000277885	0.000348738	00:00:00	249815	2022-07-15			3.34462e+08	2022-06-16	2.2498e+06	0.8
2022-06-17	1.37756e+07	0		0	0.4	0.0680532	0.219148	2.06634e+08	0.00941598	2.5		0	2022-06-17	0.617799		1	2.36579e-09	9.82821e-09	0.5	0	0	1	0.386379	1.12971	338800	0.011778	0		1.00016	0.965947	0.000348986	0.000277245	0.000348159	00:00:00	249815	2022-07-15			3.34467e+08	2022-06-17	2.27727e+06	0.8
2022-06-18	1.37756e+07	0		0	0.4	0.0633547	0.203878	2.06634e+08	0.00876476	2.5		0	2022-06-18	0.617789		1	2.2005e-09	9.14324e-09	0.5	0	0	1	0.38644	1.12971	339100	0.011778	0		1.00016	0.966099	0.00034841	0.000276607	0.00034758	00:00:00	249815	2022-07-15			3.34473e+08	2022-06-18	2.3052e+06	0.8
2022-06-19	1.37756e+07	0		0	0.4	0.0589954	0.189608	2.06634e+08	0.00816093	2.5		0	2022-06-19	0.617779		1	2.04728e-09	8.50314e-09	0.5	0	0	1	0.386501	1.12971	339400	0.011778	0		1.00016	0.966253	0.000347834	0.00027597	0.000347002	00:00:00	249815	2022-07-15			3.34478e+08	2022-06-19	2.33359e+06	0.8
2022-06-20	1.37756e+07	0		0	0.4	0.0549267	0.176403	2.06634e+08	0.00760059	2.5		0	2022-06-20	0.617769		1	1.9044e-09	7.91083e-09	0.5	0	0	1	0.386564	1.12971	339700	0.011778	0		1.00016	0.96641	0.00034726	0.000275335	0.000346426	00:00:00	249815	2022-07-15			3.34484e+08	2022-06-20	2.3625e+06	0.8
2022-06-21	1.37756e+07	0		0	0.4	0.0511365	0.164333	2.06634e+08	0.00707757	2.5		0	2022-06-21	0.617759		1	1.77143e-09	7.36945e-09	0.5	0	0	1	0.386628	1.12971	340000	0.011778	0		1.00016	0.966569	0.000346686	0.000274702	0.000345851	00:00:00	249815	2022-07-15			3.34489e+08	2022-06-21	2.39202e+06	0.8
2022-06-22	1.37756e+07	0		0	0.4	0.0476101	0.153015	2.06634e+08	0.00659027	2.5		0	2022-06-22	0.617749		1	1.64781e-09	6.86179e-09	0.5	0	0	1	0.386692	1.12971	340300	0.011778	0		1.00017	0.966731	0.000346114	0.00027407	0.000345276	00:00:00	249815	2022-07-15			3.34495e+08	2022-06-22	2.4221e+06	0.8
2022-06-23	1.37756e+07	0		0	0.4	0.0443309	0.142438	2.06634e+08	0.00613682	2.5		0	2022-06-23	0.617738		1	1.53297e-09	6.38735e-09	0.5	0	0	1	0.386758	1.12971	340600	0.011778	0		1.00017	0.966896	0.000345542	0.000273439	0.000344703	00:00:00	249815	2022-07-15			3.345e+08	2022-06-23	2.45277e+06	0.8
2022-06-24	1.37756e+07	0		0	0.4	0.0412813	0.132583	2.06634e+08	0.00571512	2.5		0	2022-06-24	0.617728		1	1.42626e-09	5.94532e-09	0.5	0	0	1	0.386825	1.12971	340900	0.011778	0		1.00017	0.967063	0.000344972	0.00027281	0.000344131	00:00:00	249815	2022-07-15			3.34506e+08	2022-06-24	2.48407e+06	0.8
2022-06-25	1.37756e+07	0		0	0.4	0.0384432	0.123422	2.06634e+08	0.00532288	2.5		0	2022-06-25	0.617718		1	1.32703e-09	5.53444e-09	0.5	0	0	1	0.386893	1.12971	341200	0.011778	0		1.00018	0.967234	0.000344402	0.000272183	0.000343559	00:00:00	249815	2022-07-15			3.34511e+08	2022-06-25	2.51602e+06	0.8
2022-06-26	1.37756e+07	0		0	0.4	0.0358005	0.114917	2.06634e+08	0.00495781	2.5		0	2022-06-26	0.617708		1	1.23472e-09	5.15296e-09	0.5	0	0	1	0.386963	1.12971	341500	0.011778	0		1.00018	0.967407	0.000343834	0.000271557	0.000342989	00:00:00	249815	2022-07-15			3.34517e+08	2022-06-26	2.54862e+06	0.8
2022-06-27	1.37756e+07	0		0	0.4	0.0333407	0.107014	2.06634e+08	0.00461782	2.5		0	2022-06-27	0.617698		1	1.14888e-09	4.79852e-09	0.5	0	0	1	0.387033	1.12971	341800	0.011778	0		1.00018	0.967583	0.000343267	0.000270933	0.00034242	00:00:00	249815	2022-07-15			3.34522e+08	2022-06-27	2.58191e+06	0.8
2022-06-28	1.37756e+07	0		0	0.4	0.0310518	0.0996464	2.06634e+08	0.00430132	2.5		0	2022-06-28	0.617688		1	1.06907e-09	4.46808e-09	0.5	0	0	1	0.387105	1.12971	342100	0.011778	0		1.00019	0.967762	0.000342701	0.00027031	0.000341852	00:00:00	249815	2022-07-15			3.34528e+08	2022-06-28	2.61587e+06	0.8
2022-06-29	1.37756e+07	0		0	0.4	0.0289217	0.0927853	2.06634e+08	0.00400677	2.5		0	2022-06-29	0.617677		1	9.94859e-10	4.16036e-09	0.5	0	0	1	0.387178	1.12971	342400	0.011778	0		1.00019	0.967945	0.000342136	0.000269688	0.000341285	00:00:00	249815	2022-07-15			3.34533e+08	2022-06-29	2.65052e+06	0.8
2022-06-30	1.37756e+07	0		0	0.4	0.0269392	0.0864013	2.06634e+08	0.00373262	2.5		0	2022-06-30	0.617667		1	9.25853e-10	3.87405e-09	0.5	0	0	1	0.387252	1.12971	342700	0.011778	0		1.00019	0.96813	0.000341571	0.000269069	0.000340719	00:00:00	249815	2022-07-15			3.34539e+08	2022-06-30	2.68587e+06	0.8
2022-07-01	1.37756e+07	0		0	0.4	0.0250938	0.0804627	2.06634e+08	0.00347742	2.5		0	2022-07-01	0.617657		1	8.61673e-10	3.60772e-09	0.5	0	0	1	0.387328	1.12971	343000	0.011778	0		1.00019	0.968319	0.000341008	0.00026845	0.000340154	00:00:00	249815	2022-07-15			3.34544e+08	2022-07-01	2.72192e+06	0.8
2022-07-02	1.37756e+07	0		0	0.4	0.0233758	0.0749378	2.06634e+08	0.00323984	2.5		0	2022-07-02	0.617647		1	8.0198e-10	3.35994e-09	0.5	0	0	1	0.387404	1.12971	343300	0.011778	0		1.0002	0.968511	0.000340446	0.000267834	0.000339591	00:00:00	249815	2022-07-15			3.3455e+08	2022-07-02	2.75867e+06	0.8
2022-07-03	1.37756e+07	0		0	0.4	0.0217766	0.0697955	2.06634e+08	0.00301863	2.5		0	2022-07-03	0.617637		1	7.46462e-10	3.12932e-09	0.5	0	0	1	0.387482	1.12971	343600	0.011778	0		1.0002	0.968706	0.000339885	0.000267218	0.000339028	00:00:00	249815	2022-07-15			3.34555e+08	2022-07-03	2.79613e+06	0.8
2022-07-04	1.37756e+07	0		0	0.4	0.020288	0.0650076	2.06634e+08	0.00281268	2.5		0	2022-07-04	0.617627		1	6.94828e-10	2.91461e-09	0.5	0	0	1	0.387562	1.12971	343900	0.011778	0		1.0002	0.968904	0.000339325	0.000266605	0.000338466	00:00:00	249815	2022-07-15			3.34561e+08	2022-07-04	2.83429e+06	0.8
2022-07-05	1.37756e+07	0		0	0.4	0.0189021	0.0605509	2.06634e+08	0.00262094	2.5		0	2022-07-05	0.617617		1	6.46801e-10	2.71475e-09	0.5	0	0	1	0.387642	1.12971	344200	0.011778	0		1.00021	0.969106	0.000338766	0.000265992	0.000337905	00:00:00	249815	2022-07-15			3.34566e+08	2022-07-05	2.87315e+06	0.8
2022-07-06	1.37756e+07	0		0	0.4	0.0176119	0.0564031	2.06634e+08	0.00244242	2.5		0	2022-07-06	0.617606		1	6.02128e-10	2.52874e-09	0.5	0	0	1	0.387724	1.12971	344500	0.011778	0		1.00021	0.96931	0.000338208	0.000265382	0.000337345	00:00:00	249815	2022-07-15			3.34572e+08	2022-07-06	2.91269e+06	0.8
2022-07-07	1.37756e+07	0		0	0.4	0.0164107	0.0525425	2.06634e+08	0.00227619	2.5		0	2022-07-07	0.617596		1	5.60571e-10	2.35562e-09	0.5	0	0	1	0.387807	1.12971	344800	0.011778	0		1.00021	0.969517	0.000337651	0.000264772	0.000336787	00:00:00	249815	2022-07-15			3.34577e+08	2022-07-07	2.95293e+06	0.8
2022-07-08	1.37756e+07	0		0	0.4	0.0152923	0.0489487	2.06634e+08	0.00212139	2.5		0	2022-07-08	0.617586		1	5.21912e-10	2.19447e-09	0.5	0	0	1	0.387891	1.12971	345100	0.011778	0		1.00022	0.969728	0.000337095	0.000264164	0.000336229	00:00:00	249815	2022-07-15			3.34583e+08	2022-07-08	2.99383e+06	0.8
2022-07-09	1.37756e+07	0		0	0.4	0.0142509	0.0456031	2.06634e+08	0.00197724	2.5		0	2022-07-09	0.617576		1	4.85948e-10	2.04444e-09	0.5	0	0	1	0.387976	1.12971	345400	0.011778	0		1.00022	0.969941	0.000336541	0.000263558	0.000335672	00:00:00	249815	2022-07-15			3.34588e+08	2022-07-09	3.0354e+06	0.8
2022-07-10	1.37756e+07	0		0	0.4	0.0132812	0.0424883	2.06634e+08	0.001843	2.5		0	2022-07-10	0.617566		1	4.5249e-10	1.90477e-09	0.5	0	0	1	0.388063	1.12971	345700	0.011778	0		1.00022	0.970157	0.000335987	0.000262953	0.000335117	00:00:00	249815	2022-07-15			3.34594e+08	2022-07-10	3.07762e+06	0.8
2022-07-11	1.37756e+07	0		0	0.4	0.0123782	0.0395885	2.06634e+08	0.00171798	2.5		0	2022-07-11	0.617556		1	4.2136e-10	1.77474e-09	0.5	0	0	1	0.38815	1.12971	346000	0.011778	0		1.00023	0.970376	0.000335434	0.00026235	0.000334562	00:00:00	249815	2022-07-15			3.34599e+08	2022-07-11	3.12047e+06	0.8
2022-07-12	1.37756e+07	0		0	0.4	0.0115373	0.0368887	2.06634e+08	0.00160154	2.5		0	2022-07-12	0.617545		1	3.92396e-10	1.65368e-09	0.5	0	0	1	0.388239	1.12971	346300	0.011778	0		1.00023	0.970598	0.000334882	0.000261748	0.000334009	00:00:00	249815	2022-07-15			3.34605e+08	2022-07-12	3.16393e+06	0.8
2022-07-13	1.37756e+07	0		0	0.4	0.0107542	0.034375	2.06634e+08	0.00149308	2.5		0	2022-07-13	0.617535		1	3.65445e-10	1.54097e-09	0.5	0	0	1	0.388329	1.12971	346600	0.011778	0		1.00023	0.970822	0.000334331	0.000261148	0.000333456	00:00:00	249815	2022-07-15			3.3461e+08	2022-07-13	3.208e+06	0.8
2022-07-14	1.37756e+07	0		0	0.4	0.0100249	0.0320344	2.06634e+08	0.00139206	2.5		0	2022-07-14	0.617525		1	3.40367e-10	1.43602e-09	0.5	0	0	1	0.38842	1.12971	346900	0.011778	0		1.00023	0.971049	0.000333781	0.000260549	0.000332905	00:00:00	249815	2022-07-15			3.34616e+08	2022-07-14	3.25263e+06	0.8
2022-07-15	1.37756e+07	0		0	0.4	0	0.029855	2.06634e+08	0.00129796	2.5		0	2022-07-15	0.617515		1	0	1.3383e-09	0.5	0	0	1	0.388511	1.12971	347200	0.011778	0		1.00024	0.971279	0.000333232	0.000259951	0.000332354	00:00:00	249815	2022-07-15			3.34621e+08	2022-07-15	3.29783e+06	0.8
2022-07-16	1.37756e+07	0		0	0.4	0	0.0266151	2.06634e+08	0	2.5		0	2022-07-16	0.617505		1	0	1.19305e-09	0.5	0	0	1	0.388604	1.12971	347500	0.011778	0		1.00024	0.97151	0.000332684	0.000259355	0.000331804	00:00:00	249815	2022-07-16			3.34627e+08	2022-07-16	3.34355e+06	0.8
2022-07-17	1.37756e+07	0		0	0.4	0	0.0235965	2.06634e+08	0	2.5		0	2022-07-17	0.617495		1	0	1.05772e-09	0.5	0	0	1	0.388698	1.12971	347800	0.011778	0		1.00024	0.971744	0.000332138	0.00025876	0.000331256	00:00:00	249815	2022-07-17			3.34632e+08	2022-07-17	3.38977e+06	0.8
2022-07-18	1.37756e+07	0		0	0.4	0	0.0207838	2.06634e+08	0	2.5		0	2022-07-18	0.617485		1	0	9.31626e-10	0.5	0	0	1	0.388792	1.12971	348100	0.011778	0		1.00024	0.97198	0.000331592	0.000258167	0.000330708	00:00:00	249815	2022-07-18			3.34638e+08	2022-07-18	3.43648e+06	0.8
2022-07-19	1.37756e+07	0		0	0.4	0	0.0181629	2.06634e+08	0	2.5		0	2022-07-19	0.617474		1	0	8.1413e-10	0.5	0	0	1	0.388887	1.12971	348400	0.011778	0		1.00024	0.972218	0.000331047	0.000257575	0.000330162	00:00:00	249815	2022-07-19			3.34643e+08	2022-07-19	3.48362e+06	0.8
2022-07-20	1.37756e+07	0		0	0.4	0	0.0157205	2.06634e+08	0	2.5		0	2022-07-20	0.617464		1	0	7.0464e-10	0.5	0	0	1	0.388983	1.12971	348700	0.011778	0		1.00025	0.972458	0.000330503	0.000256985	0.000329616	00:00:00	249815	2022-07-20			3.34649e+08	2022-07-20	3.53119e+06	0.8
2022-07-21	1.37756e+07	0		0	0.4	0	0.0134443	2.06634e+08	0	2.5		0	2022-07-21	0.617454		1	0	6.02604e-10	0.5	0	0	1	0.38908	1.12971	349000	0.011778	0		1.00025	0.972699	0.00032996	0.000256396	0.000329072	00:00:00	249815	2022-07-21			3.34654e+08	2022-07-21	3.57914e+06	0.8
2022-07-22	1.37756e+07	0		0	0.4	0	0.0113229	2.06634e+08	0	2.5		0	2022-07-22	0.617444		1	0	5.07509e-10	0.5	0	0	1	0.389177	1.12971	349300	0.011778	0		1.00025	0.972942	0.000329418	0.000255809	0.000328528	00:00:00	249815	2022-07-22			3.3466e+08	2022-07-22	3.62744e+06	0.8
2022-07-23	1.37756e+07	0		0	0.4	0	0.00934562	2.06634e+08	0	2.5		0	2022-07-23	0.617434		1	0	4.18879e-10	0.5	0	0	1	0.389275	1.12971	349600	0.011778	0		1.00025	0.973186	0.000328877	0.000255223	0.000327986	00:00:00	249815	2022-07-23			3.34665e+08	2022-07-23	3.67607e+06	0.8
2022-07-24	1.37756e+07	0		0	0.4	0	0.00750262	2.06634e+08	0	2.5		0	2022-07-24	0.617424		1	0	3.36269e-10	0.5	0	0	1	0.389373	1.12971	349900	0.011778	0		1.00025	0.973432	0.000328337	0.000254638	0.000327444	00:00:00	249815	2022-07-24			3.34671e+08	2022-07-24	3.72497e+06	0.8
2022-07-25	1.37756e+07	0		0	0.4	0	0.00578464	2.06634e+08	0	2.5		0	2022-07-25	0.617414		1	0	2.59264e-10	0.5	0	0	1	0.389471	1.12971	350200	0.011778	0		1.00025	0.973678	0.000327798	0.000254055	0.000326903	00:00:00	249815	2022-07-25			3.34676e+08	2022-07-25	3.77412e+06	0.8
2022-07-26	1.37756e+07	0		0	0.4	0	0.0041831	2.06634e+08	0	2.5		0	2022-07-26	0.617403		1	0	1.87481e-10	0.5	0	0	1	0.38957	1.12971	350500	0.011778	0		1.00025	0.973926	0.00032726	0.000253473	0.000326364	00:00:00	249815	2022-07-26			3.34682e+08	2022-07-26	3.82349e+06	0.8
2022-07-27	1.37756e+07	0		0	0.4	0	0.00269002	2.06634e+08	0	2.5		0	2022-07-27	0.617393		1	0	1.20561e-10	0.5	0	0	1	0.38967	1.12971	350800	0.011778	0		1.00025	0.974174	0.000326723	0.000252893	0.000325825	00:00:00	249815	2022-07-27			3.34687e+08	2022-07-27	3.87302e+06	0.8
2022-07-28	1.37756e+07	0		0	0.4	0	0.00129796	2.06634e+08	0	2.5		0	2022-07-28	0.617383		1	0	5.81709e-11	0.5	0	0	1	0.389769	1.12971	351100	0.011778	0		1.00026	0.974423	0.000326187	0.000252314	0.000325288	00:00:00	249815	2022-07-28			3.34693e+08	2022-07-28	3.92269e+06	0.8
2022-07-29	1.37756e+07	0		0	0.4	0	0	2.06634e+08	0	2.5		0	2022-07-29	0.617373		1	0	0	0.5	0	0	1	0.389869	1.12971	351400	0.011778	0		1.00026	0.974671	0.000325652	0.000251736	0.000324751	00:00:00	249815	2022-07-29			3.34698e+08	2022-07-29	3.97246e+06	0.8
2022-07-30	1.37756e+07	0		0	0.4	0	0	2.06634e+08	0	2.5		0	2022-07-30	0.617363		1	0	0	0.5	0	0	1	0.389968	1.12971	351700	0.011778	0		1.00026	0.974921	0.000325118	0.00025116	0.000324215	00:00:00	249815	2022-07-30			3.34704e+08	2022-07-30	4.02228e+06	0.8
2022-07-31	1.37756e+07	0		0	0.4	0	0	2.06634e+08	0	2.5		0	2022-07-31	0.617353		1	0	0	0.5	0	0	1	0.390068	1.12971	352000	0.011778	0		1.00026	0.97517	0.000324585	0.000250585	0.000323681	00:00:00	249815	2022-07-31			3.34709e+08	2022-07-31	4.07212e+06	0.8
2022-08-01	1.37756e+07	0		0	0.4	0	0	2.06634e+08	0	2.5		0	2022-08-01	0.617342		1	0	0	0.5	0	0	1	0.390167	1.12971	352300	0.011778	0		1.00026	0.975419	0.000324053	0.000250012	0.000323147	00:00:00	249815	2022-08-01			3.34715e+08	2022-08-01	4.12193e+06	0.8
2022-08-02	1.37756e+07	0		0	0.4	0	0	2.06634e+08	0	2.5		0	2022-08-02	0.617332		1	0	0	0.5	0	0	1	0.390267	1.12971	352600	0.011778	0		1.00025	0.975667	0.000323522	0.00024944	0.000322614	00:00:00	249815	2022-08-02			3.3472e+08	2022-08-02	4.17169e+06	0.8
2022-08-03	1.37756e+07	0		0	0.4	0	0	2.06634e+08	0	2.5		0	2022-08-03	0.617322		1	0	0	0.5	0	0	1	0.390366	1.12971	352900	0.011778	0		1.00025	0.975915	0.000322991	0.000248869	0.000322082	00:00:00	249815	2022-08-03			3.34726e+08	2022-08-03	4.22134e+06	0.8
2022-08-04	1.37756e+07	0		0	0.4	0	0	2.06634e+08	0	2.5		0	2022-08-04	0.617312		1	0	0	0.5	0	0	1	0.390465	1.12971	353200	0.011778	0		1.00025	0.976163	0.000322462	0.0002483	0.000321552	00:00:00	249815	2022-08-04			3.34731e+08	2022-08-04	4.27085e+06	0.8
2022-08-05	1.37756e+07	0		0	0.4	0	0	2.06634e+08	0	2.5		0	2022-08-05	0.617302		1	0	0	0.5	0	0	1	0.390564	1.12971	353500	0.011778	0		1.00025	0.976409	0.000321934	0.000247732	0.000321022	00:00:00	249815	2022-08-05			3.34737e+08	2022-08-05	4.32019e+06	0.8
2022-08-06	1.37756e+07	0		0	0.4	0	0	2.06634e+08	0	2.5		0	2022-08-06	0.617292		1	0	0	0.5	0	0	1	0.390662	1.12971	353800	0.011778	0		1.00025	0.976655	0.000321406	0.000247165	0.000320493	00:00:00	249815	2022-08-06			3.34742e+08	2022-08-06	4.36931e+06	0.8
2022-08-07	1.37756e+07	0		0	0.4	0	0	2.06634e+08	0	2.5		0	2022-08-07	0.617282		1	0	0	0.5	0	0	1	0.390759	1.12971	354100	0.011778	0		1.00025	0.976899	0.00032088	0.0002466	0.000319965	00:00:00	249815	2022-08-07			3.34748e+08	2022-08-07	4.41817e+06	0.8
2022-08-08	1.37756e+07	0		0	0.4	0	0	2.06634e+08	0	2.5		0	2022-08-08	0.617271		1	0	0	0.5	0	0	1	0.390857	1.12971	354400	0.011778	0		1.00025	0.977141	0.000320355	0.000246037	0.000319438	00:00:00	249815	2022-08-08			3.34753e+08	2022-08-08	4.46674e+06	0.8
2022-08-09	1.37756e+07	0		0	0.4	0	0	2.06634e+08	0	2.5		0	2022-08-09	0.617261		1	0	0	0.5	0	0	1	0.390953	1.12971	354700	0.011778	0		1.00025	0.977383	0.00031983	0.000245474	0.000318912	00:00:00	249815	2022-08-09			3.34759e+08	2022-08-09	4.51499e+06	0.8
2022-08-10	1.37756e+07	0		0	0.4	0	0	2.06634e+08	0	2.5		0	2022-08-10	0.617251		1	0	0	0.5	0	0	1	0.391049	1.12971	355000	0.011778	0		1.00025	0.977622	0.000319306	0.000244913	0.000318387	00:00:00	249815	2022-08-10			3.34764e+08	2022-08-10	4.56287e+06	0.8
2022-08-11	1.37756e+07	0		0	0.4	0	0	2.06634e+08	0	2.5		0	2022-08-11	0.617241		1	0	0	0.5	0	0	1	0.391144	1.12971	355300	0.011778	0		1.00024	0.97786	0.000318784	0.000244353	0.000317863	00:00:00	249815	2022-08-11			3.3477e+08	2022-08-11	4.61036e+06	0.8
2022-08-12	1.37756e+07	0		0	0.4	0	0	2.06634e+08	0	2.5		0	2022-08-12	0.617231		1	0	0	0.5	0	0	1	0.391238	1.12971	355600	0.011778	0		1.00024	0.978096	0.000318262	0.000243795	0.00031734	00:00:00	249815	2022-08-12			3.34775e+08	2022-08-12	4.65742e+06	0.8
2022-08-13	1.37756e+07	0		0	0.4	0	0	2.06634e+08	0	2.5		0	2022-08-13	0.617221		1	0	0	0.5	0	0	1	0.391332	1.12971	355900	0.011778	0		1.00024	0.978329	0.000317741	0.000243238	0.000316818	00:00:00	249815	2022-08-13			3.34781e+08	2022-08-13	4.70402e+06	0.8
2022-08-14	1.37756e+07	0		0	0.4	0	0	2.06634e+08	0	2.5		0	2022-08-14	0.617211		1	0	0	0.5	0	0	1	0.391424	1.12971	356200	0.011778	0		1.00024	0.978561	0.000317222	0.000242682	0.000316296	00:00:00	249815	2022-08-14			3.34786e+08	2022-08-14	4.75013e+06	0.8
2022-08-15	1.37756e+07	0		0	0.4	0	0	2.06634e+08	0	2.5		0	2022-08-15	0.6172		1	0	0	0.5	0	0	1	0.391518	1.12971	356500	0.011778	0		1.00024	0.978794	0.000316703	0.000242128	0.000315776	00:00:00	249815	2022-08-15			3.34792e+08	2022-08-15	4.79673e+06	0.8
2022-08-16	1.37756e+07	0		0	0.4	0	0	2.06634e+08	0	2.5		0	2022-08-16	0.61719		1	0	0	0.5	0	0	1	0.391611	1.12971	356800	0.011778	0		1.00024	0.979027	0.000316185	0.000241575	0.000315257	00:00:00	249815	2022-08-16			3.34797e+08	2022-08-16	4.8432e+06	0.8
2022-08-17	1.37756e+07	0		0	0.4	0	0	2.06634e+08	0	2.5		0	2022-08-17	0.61718		1	0	0	0.5	0	0	1	0.391704	1.12971	357100	0.011778	0		1.00024	0.979259	0.000315668	0.000241023	0.000314738	00:00:00	249815	2022-08-17			3.34803e+08	2022-08-17	4.88961e+06	0.8
2022-08-18	1.37756e+07	0		0	0.4	0	0	2.06634e+08	0	2.5		0	2022-08-18	0.61717		1	0	0	0.5	0	0	1	0.391797	1.12971	357400	0.011778	0		1.00024	0.979492	0.000315152	0.000240473	0.000314221	00:00:00	249815	2022-08-18			3.34808e+08	2022-08-18	4.93611e+06	0.8
2022-08-19	1.37756e+07	0		0	0.4	0	0	2.06634e+08	0	2.5		0	2022-08-19	0.61716		1	0	0	0.5	0	0	1	0.39189	1.12971	357700	0.011778	0		1.00024	0.979725	0.000314637	0.000239924	0.000313704	00:00:00	249815	2022-08-19			3.34814e+08	2022-08-19	4.98263e+06	0.8
2022-08-20	1.37756e+07	0		0	0.4	0	0	2.06634e+08	0	2.5		0	2022-08-20	0.61715		1	0	0	0.5	0	0	1	0.391983	1.12971	358000	0.011778	0		1.00024	0.979958	0.000314123	0.000239377	0.000313189	00:00:00	249815	2022-08-20			3.34819e+08	2022-08-20	5.02923e+06	0.8
2022-08-21	1.37756e+07	0		0	0.4	0	0	2.06634e+08	0	2.5		0	2022-08-21	0.61714		1	0	0	0.5	0	0	1	0.392077	1.12971	358300	0.011778	0		1.00024	0.980192	0.000313609	0.00023883	0.000312674	00:00:00	249815	2022-08-21			3.34825e+08	2022-08-21	5.07601e+06	0.8
2022-08-22	1.37756e+07	0		0	0.4	0	0	2.06634e+08	0	2.5		0	2022-08-22	0.617129		1	0	0	0.5	0	0	1	0.39217	1.12971	358600	0.011778	0		1.00024	0.980426	0.000313097	0.000238285	0.00031216	00:00:00	249815	2022-08-22			3.3483e+08	2022-08-22	5.12285e+06	0.8
2022-08-23	1.37756e+07	0		0	0.4	0	0	2.06634e+08	0	2.5		0	2022-08-23	0.617119		1	0	0	0.5	0	0	1	0.392264	1.12971	358900	0.011778	0		1.00024	0.98066	0.000312586	0.000237741	0.000311647	00:00:00	249815	2022-08-23			3.34836e+08	2022-08-23	5.16978e+06	0.8
2022-08-24	1.37756e+07	0		0	0.4	0	0	2.06634e+08	0	2.5		0	2022-08-24	0.617109		1	0	0	0.5	0	0	1	0.392358	1.12971	359200	0.011778	0		1.00024	0.980895	0.000312075	0.000237199	0.000311135	00:00:00	249815	2022-08-24			3.34841e+08	2022-08-24	5.2168e+06	0.8
2022-08-25	1.37756e+07	0		0	0.4	0	0	2.06634e+08	0	2.5		0	2022-08-25	0.617099		1	0	0	0.5	0	0	1	0.392452	1.12971	359500	0.011778	0		1.00024	0.98113	0.000311565	0.000236658	0.000310624	00:00:00	249815	2022-08-25			3.34847e+08	2022-08-25	5.26389e+06	0.8
2022-08-26	1.37756e+07	0		0	0.4	0	0	2.06634e+08	0	2.5		0	2022-08-26	0.617089		1	0	0	0.5	0	0	1	0.392546	1.12971	359800	0.011778	0		1.00024	0.981365	0.000311057	0.000236118	0.000310114	00:00:00	249815	2022-08-26			3.34852e+08	2022-08-26	5.31104e+06	0.8
2022-08-27	1.37756e+07	0		0	0.4	0	0	2.06634e+08	0	2.5		0	2022-08-27	0.617079		1	0	0	0.5	0	0	1	0.39264	1.12971	360100	0.011778	0		1.00024	0.9816	0.000310549	0.00023558	0.000309605	00:00:00	249815	2022-08-27			3.34858e+08	2022-08-27	5.35824e+06	0.8
2022-08-28	1.37756e+07	0		0	0.4	0	0	2.06634e+08	0	2.5		0	2022-08-28	0.617069		1	0	0	0.5	0	0	1	0.392734	1.12971	360400	0.011778	0		1.00024	0.981835	0.000310042	0.000235042	0.000309097	00:00:00	249815	2022-08-28			3.34863e+08	2022-08-28	5.40545e+06	0.8
2022-08-29	1.37756e+07	0		0	0.4	0	0	2.06634e+08	0	2.5		0	2022-08-29	0.617058		1	0	0	0.5	0	0	1	0.392828	1.12971	360700	0.011778	0		1.00024	0.98207	0.000309536	0.000234506	0.00030859	00:00:00	249815	2022-08-29			3.34869e+08	2022-08-29	5.45265e+06	0.8
2022-08-30	1.37756e+07	0		0	0.4	0	0	2.06634e+08	0	2.5		0	2022-08-30	0.617048		1	0	0	0.5	0	0	1	0.392922	1.12971	361000	0.011778	0		1.00024	0.982305	0.000309031	0.000233972	0.000308083	00:00:00	249815	2022-08-30			3.34874e+08	2022-08-30	5.49982e+06	0.8
2022-08-31	1.37756e+07	0		0	0.4	0	0	2.06634e+08	0	2.5		0	2022-08-31	0.617038		1	0	0	0.5	0	0	1	0.393016	1.12971	361300	0.011778	0		1.00024	0.98254	0.000308527	0.000233438	0.000307578	00:00:00	249815	2022-08-31			3.3488e+08	2022-08-31	5.54693e+06	0.8
2022-09-01	1.37756e+07	0		0	0.4	0	0	2.06634e+08	0	2.5		0	2022-09-01	0.617028		1	0	0	0.555556	0	0	1	0.39312	1.12971	361600	0.011778	0		1.00026	0.9828	0.000308024	0.000232906	0.000307073	00:00:00	249815	2022-09-01			3.34885e+08	2022-09-01	5.59984e+06	0.9
2022-09-02	1.37756e+07	0		0	0.4	0	0	2.06634e+08	0	2.5		0	2022-09-02	0.617018		1	0	0	0.555556	0	0	1	0.393226	1.12971	361900	0.011778	0		1.00027	0.983065	0.000307522	0.000232375	0.00030657	00:00:00	249815	2022-09-02			3.34891e+08	2022-09-02	5.65368e+06	0.9
2022-09-03	1.37756e+07	0		0	0.4	0	0	2.06634e+08	0	2.5		0	2022-09-03	0.617008		1	0	0	0.555556	0	0	1	0.393334	1.12971	362200	0.011778	0		1.00027	0.983334	0.00030702	0.000231846	0.000306067	00:00:00	249815	2022-09-03			3.34896e+08	2022-09-03	5.70862e+06	0.9
2022-09-04	1.37756e+07	0		0	0.4	0	0	2.06634e+08	0	2.5		0	2022-09-04	0.616998		1	0	0	0.555556	0	0	1	0.393443	1.12971	362500	0.011778	0		1.00028	0.983609	0.00030652	0.000231318	0.000305565	00:00:00	249815	2022-09-04			3.34902e+08	2022-09-04	5.76485e+06	0.9
2022-09-05	1.37756e+07	0		0	0.4	0	0	2.06634e+08	0	2.5		0	2022-09-05	0.616987		1	0	0	0.555556	0	0	1	0.393556	1.12971	362800	0.011778	0		1.00029	0.98389	0.00030602	0.000230791	0.000305064	00:00:00	249815	2022-09-05			3.34907e+08	2022-09-05	5.82257e+06	0.9
2022-09-06	1.37756e+07	0		0	0.4	0	0	2.06634e+08	0	2.5		0	2022-09-06	0.616977		1	0	0	0.555556	0	0	1	0.393672	1.12971	363100	0.011778	0		1.00029	0.984179	0.000305521	0.000230265	0.000304564	00:00:00	249815	2022-09-06			3.34913e+08	2022-09-06	5.88207e+06	0.9
2022-09-07	1.37756e+07	0		0	0.4	0	0	2.06634e+08	0	2.5		0	2022-09-07	0.616967		1	0	0	0.555556	0	0	1	0.393791	1.12971	363400	0.011778	0		1.0003	0.984477	0.000305024	0.00022974	0.000304065	00:00:00	249815	2022-09-07			3.34918e+08	2022-09-07	5.94364e+06	0.9
2022-09-08	1.37756e+07	0		0	0.4	0	0	2.06634e+08	0	2.5		0	2022-09-08	0.616957		1	0	0	0.555556	0	0	1	0.393913	1.12971	363700	0.011778	0		1.00031	0.984782	0.000304527	0.000229217	0.000303567	00:00:00	249815	2022-09-08			3.34924e+08	2022-09-08	6.00658e+06	0.9
2022-09-09	1.37756e+07	0		0	0.4	0	0	2.06634e+08	0	2.5		0	2022-09-09	0.616947		1	0	0	0.555556	0	0	1	0.394037	1.12971	364000	0.011778	0		1.00032	0.985092	0.000304031	0.000228695	0.00030307	00:00:00	249815	2022-09-09			3.34929e+08	2022-09-09	6.07096e+06	0.9
2022-09-10	1.37756e+07	0		0	0.4	0	0	2.06634e+08	0	2.5		0	2022-09-10	0.616937		1	0	0	0.555556	0	0	1	0.394164	1.12971	364300	0.011778	0		1.00032	0.985409	0.000303536	0.000228175	0.000302573	00:00:00	249815	2022-09-10			3.34935e+08	2022-09-10	6.13682e+06	0.9
2022-09-11	1.37756e+07	0		0	0.4	0	0	2.06634e+08	0	2.5		0	2022-09-11	0.616927		1	0	0	0.555556	0	0	1	0.394293	1.12971	364600	0.011778	0		1.00033	0.985733	0.000303041	0.000227655	0.000302078	00:00:00	249815	2022-09-11			3.3494e+08	2022-09-11	6.20416e+06	0.9
2022-09-12	1.37756e+07	0		0	0.4	0	0	2.06634e+08	0	2.5		0	2022-09-12	0.616916		1	0	0	0.555556	0	0	1	0.394425	1.12971	364900	0.011778	0		1.00033	0.986062	0.000302548	0.000227137	0.000301583	00:00:00	249815	2022-09-12			3.34946e+08	2022-09-12	6.27295e+06	0.9
2022-09-13	1.37756e+07	0		0	0.4	0	0	2.06634e+08	0	2.5		0	2022-09-13	0.616906		1	0	0	0.555556	0	0	1	0.394559	1.12971	365200	0.011778	0		1.00034	0.986398	0.000302055	0.00022662	0.000301089	00:00:00	249815	2022-09-13			3.34951e+08	2022-09-13	6.34314e+06	0.9
2022-09-14	1.37756e+07	0		0	0.4	0	0	2.06634e+08	0	2.5		0	2022-09-14	0.616896		1	0	0	0.555556	0	0	1	0.394696	1.12971	365500	0.011778	0		1.00035	0.986739	0.000301564	0.000226104	0.000300597	00:00:00	249815	2022-09-14			3.34957e+08	2022-09-14	6.41456e+06	0.9
2022-09-15	1.37756e+07	0		0	0.4	0	0	2.06634e+08	0	2.5		0	2022-09-15	0.616886		1	0	0	0.555556	0	0	1	0.394834	1.12971	365800	0.011778	0		1.00035	0.987085	0.000301073	0.00022559	0.000300105	00:00:00	249815	2022-09-15			3.34962e+08	2022-09-15	6.48717e+06	0.9
2022-09-16	1.37756e+07	0		0	0.4	0	0	2.06634e+08	0	2.5		0	2022-09-16	0.616876		1	0	0	0.555556	0	0	1	0.394975	1.12971	366100	0.011778	0		1.00036	0.987437	0.000300583	0.000225076	0.000299613	00:00:00	249815	2022-09-16			3.34968e+08	2022-09-16	6.56091e+06	0.9
2022-09-17	1.37756e+07	0		0	0.4	0	0	2.06634e+08	0	2.5		0	2022-09-17	0.616866		1	0	0	0.555556	0	0	1	0.395117	1.12971	366400	0.011778	0		1.00036	0.987792	0.000300094	0.000224564	0.000299123	00:00:00	249815	2022-09-17			3.34974e+08	2022-09-17	6.63571e+06	0.9
2022-09-18	1.37756e+07	0		0	0.4	0	0	2.06634e+08	0	2.5		0	2022-09-18	0.616856		1	0	0	0.555556	0	0	1	0.395261	1.12971	366700	0.011778	0		1.00036	0.988152	0.000299606	0.000224053	0.000298634	00:00:00	249815	2022-09-18			3.34979e+08	2022-09-18	6.71145e+06	0.9
2022-09-19	1.37756e+07	0		0	0.4	0	0	2.06634e+08	0	2.5		0	2022-09-19	0.616845		1	0	0	0.555556	0	0	1	0.395406	1.12971	367000	0.011778	0		1.00037	0.988515	0.000299119	0.000223544	0.000298145	00:00:00	249815	2022-09-19			3.34985e+08	2022-09-19	6.78804e+06	0.9
2022-09-20	1.37756e+07	0		0	0.4	0	0	2.06634e+08	0	2.5		0	2022-09-20	0.616835		1	0	0	0.555556	0	0	1	0.395552	1.12971	367300	0.011778	0		1.00037	0.988881	0.000298632	0.000223035	0.000297658	00:00:00	249815	2022-09-20			3.3499e+08	2022-09-20	6.86537e+06	0.9
2022-09-21	1.37756e+07	0		0	0.4	0	0	2.06634e+08	0	2.5		0	2022-09-21	0.616825		1	0	0	0.555556	0	0	1	0.3957	1.12971	367600	0.011778	0		1.00037	0.98925	0.000298147	0.000222528	0.000297171	00:00:00	249815	2022-09-21			3.34996e+08	2022-09-21	6.94333e+06	0.9
2022-09-22	1.37756e+07	0		0	0.4	0	0	2.06634e+08	0	2.5		0	2022-09-22	0.616815		1	0	0	0.555556	0	0	1	0.395848	1.12971	367900	0.011778	0		1.00038	0.989621	0.000297662	0.000222022	0.000296685	00:00:00	249815	2022-09-22			3.35001e+08	2022-09-22	7.02182e+06	0.9
2022-09-23	1.37756e+07	0		0	0.4	0	0	2.06634e+08	0	2.5		0	2022-09-23	0.616805		1	0	0	0.555556	0	0	1	0.395997	1.12971	368200	0.011778	0		1.00038	0.989994	0.000297179	0.000221518	0.0002962	00:00:00	249815	2022-09-23			3.35007e+08	2022-09-23	7.10071e+06	0.9
2022-09-24	1.37756e+07	0		0	0.4	0	0	2.06634e+08	0	2.5		0	2022-09-24	0.616795		1	0	0	0.555556	0	0	1	0.396147	1.12971	368500	0.011778	0		1.00038	0.990367	0.000296696	0.000221014	0.000295716	00:00:00	249815	2022-09-24			3.35012e+08	2022-09-24	7.17989e+06	0.9
2022-09-25	1.37756e+07	0		0	0.4	0	0	2.06634e+08	0	2.5		0	2022-09-25	0.616785		1	0	0	0.555556	0	0	1	0.396297	1.12971	368800	0.011778	0		1.00038	0.990741	0.000296214	0.000220512	0.000295233	00:00:00	249815	2022-09-25			3.35018e+08	2022-09-25	7.25923e+06	0.9
2022-09-26	1.37756e+07	0		0	0.4	0	0	2.06634e+08	0	2.5		0	2022-09-26	0.616774		1	0	0	0.555556	0	0	1	0.396446	1.12971	369100	0.011778	0		1.00038	0.991116	0.000295732	0.000220011	0.000294751	00:00:00	249815	2022-09-26			3.35023e+08	2022-09-26	7.33862e+06	0.9
2022-09-27	1.37756e+07	0		0	0.4	0	0	2.06634e+08	0	2.5		0	2022-09-27	0.616764		1	0	0	0.555556	0	0	1	0.396596	1.12971	369400	0.011778	0		1.00038	0.991489	0.000295252	0.000219511	0.000294269	00:00:00	249815	2022-09-27			3.35029e+08	2022-09-27	7.41793e+06	0.9
2022-09-28	1.37756e+07	0		0	0.4	0	0	2.06634e+08	0	2.5		0	2022-09-28	0.616754		1	0	0	0.555556	0	0	1	0.396745	1.12971	369700	0.011778	0		1.00038	0.991862	0.000294773	0.000219012	0.000293789	00:00:00	249815	2022-09-28			3.35034e+08	2022-09-28	7.49704e+06	0.9
2022-09-29	1.37756e+07	0		0	0.4	0	0	2.06634e+08	0	2.5		0	2022-09-29	0.616744		1	0	0	0.555556	0	0	1	0.396893	1.12971	370000	0.011778	0		1.00037	0.992233	0.000294294	0.000218514	0.000293309	00:00:00	249815	2022-09-29			3.3504e+08	2022-09-29	7.57582e+06	0.9
2022-09-30	1.37756e+07	0		0	0.4	0	0	2.06634e+08	0	2.5		0	2022-09-30	0.616734		1	0	0	0.555556	0	0	1	0.397041	1.12971	370300	0.011778	0		1.00037	0.992602	0.000293816	0.000218018	0.00029283	00:00:00	249815	2022-09-30			3.35045e+08	2022-09-30	7.65416e+06	0.9
2022-10-01	1.37756e+07	0		0	0.4	0	0	2.06634e+08	0	2.5		0	2022-10-01	0.616724		1	0	0	0.6	0	0	1	0.397203	1.12971	370600	0.011778	0		1.00041	0.993006	0.000293339	0.000217523	0.000292352	00:00:00	249815	2022-10-01			3.35051e+08	2022-10-01	7.74059e+06	1
2022-10-02	1.37756e+07	0		0	0.4	0	0	2.06634e+08	0	2.5		0	2022-10-02	0.616714		1	0	0	0.6	0	0	1	0.397365	1.12971	370900	0.011778	0		1.00041	0.993414	0.000292863	0.000217029	0.000291875	00:00:00	249815	2022-10-02			3.35056e+08	2022-10-02	7.82778e+06	1
2022-10-03	1.37756e+07	0		0	0.4	0	0	2.06634e+08	0	2.5		0	2022-10-03	0.616703		1	0	0	0.6	0	0	1	0.39753	1.12971	371200	0.011778	0		1.00041	0.993825	0.000292388	0.000216536	0.000291398	00:00:00	249815	2022-10-03			3.35062e+08	2022-10-03	7.91584e+06	1
2022-10-04	1.37756e+07	0		0	0.4	0	0	2.06634e+08	0	2.5		0	2022-10-04	0.616693		1	0	0	0.6	0	0	1	0.397696	1.12971	371500	0.011778	0		1.00042	0.99424	0.000291914	0.000216044	0.000290923	00:00:00	249815	2022-10-04			3.35067e+08	2022-10-04	8.00493e+06	1
2022-10-05	1.37756e+07	0		0	0.4	0	0	2.06634e+08	0	2.5		0	2022-10-05	0.616683		1	0	0	0.6	0	0	1	0.397864	1.12971	371800	0.011778	0		1.00042	0.99466	0.00029144	0.000215554	0.000290448	00:00:00	249815	2022-10-05			3.35073e+08	2022-10-05	8.09523e+06	1
2022-10-06	1.37756e+07	0		0	0.4	0	0	2.06634e+08	0	2.5		0	2022-10-06	0.616673		1	0	0	0.6	0	0	1	0.398035	1.12971	372100	0.011778	0		1.00043	0.995087	0.000290967	0.000215064	0.000289974	00:00:00	249815	2022-10-06			3.35078e+08	2022-10-06	8.18698e+06	1
2022-10-07	1.37756e+07	0		0	0.4	0	0	2.06634e+08	0	2.5		0	2022-10-07	0.616663		1	0	0	0.6	0	0	1	0.398208	1.12971	372400	0.011778	0		1.00044	0.995521	0.000290495	0.000214576	0.000289501	00:00:00	249815	2022-10-07			3.35084e+08	2022-10-07	8.28048e+06	1
2022-10-08	1.37756e+07	0		0	0.4	0	0	2.06634e+08	0	2.5		0	2022-10-08	0.616653		1	0	0	0.6	0	0	1	0.398383	1.12971	372700	0.011778	0		1.00044	0.995957	0.000290024	0.000214089	0.000289029	00:00:00	249815	2022-10-08			3.35089e+08	2022-10-08	8.37459e+06	1
2022-10-09	1.37756e+07	0		0	0.4	0	0	2.06634e+08	0	2.5		0	2022-10-09	0.616643		1	0	0	0.6	0	0	1	0.398558	1.12971	373000	0.011778	0		1.00044	0.996396	0.000289554	0.000213603	0.000288558	00:00:00	249815	2022-10-09			3.35095e+08	2022-10-09	8.46926e+06	1
2022-10-10	1.37756e+07	0		0	0.4	0	0	2.06634e+08	0	2.5		0	2022-10-10	0.616633		1	0	0	0.6	0	0	1	0.398734	1.12971	373300	0.011778	0		1.00044	0.996836	0.000289085	0.000213119	0.000288087	00:00:00	249815	2022-10-10			3.351e+08	2022-10-10	8.5644e+06	1
2022-10-11	1.37756e+07	0		0	0.4	0	0	2.06634e+08	0	2.5		0	2022-10-11	0.616622		1	0	0	0.6	0	0	1	0.398911	1.12971	373600	0.011778	0		1.00044	0.997278	0.000288616	0.000212635	0.000287618	00:00:00	249815	2022-10-11			3.35106e+08	2022-10-11	8.65992e+06	1
2022-10-12	1.37756e+07	0		0	0.4	0	0	2.06634e+08	0	2.5		0	2022-10-12	0.616612		1	0	0	0.6	0	0	1	0.399088	1.12971	373900	0.011778	0		1.00044	0.99772	0.000288149	0.000212153	0.000287149	00:00:00	249815	2022-10-12			3.35111e+08	2022-10-12	8.75564e+06	1
2022-10-13	1.37756e+07	0		0	0.4	0	0	2.06634e+08	0	2.5		0	2022-10-13	0.616602		1	0	0	0.6	0	0	1	0.399265	1.12971	374200	0.011778	0		1.00044	0.998162	0.000287682	0.000211672	0.000286681	00:00:00	249815	2022-10-13			3.35117e+08	2022-10-13	8.85135e+06	1
2022-10-14	1.37756e+07	0		0	0.4	0	0	2.06634e+08	0	2.5		0	2022-10-14	0.616592		1	0	0	0.6	0	0	1	0.399441	1.12971	374500	0.011778	0		1.00044	0.998603	0.000287216	0.000211191	0.000286214	00:00:00	249815	2022-10-14			3.35122e+08	2022-10-14	8.94674e+06	1
2022-10-15	1.37756e+07	0		0	0.4	0	0	2.06634e+08	0	2.5		0	2022-10-15	0.616582		1	0	0	0.6	0	0	1	0.399616	1.12971	374800	0.011778	0		1.00044	0.999041	0.000286751	0.000210713	0.000285748	00:00:00	249815	2022-10-15			3.35128e+08	2022-10-15	9.04165e+06	1
2022-10-16	1.37756e+07	0		0	0.4	0	0	2.06634e+08	0	2.5		0	2022-10-16	0.616572		1	0	0	0.6	0	0	1	0.39979	1.12971	375100	0.011778	0		1.00044	0.999476	0.000286286	0.000210235	0.000285282	00:00:00	249815	2022-10-16			3.35133e+08	2022-10-16	9.13591e+06	1
2022-10-17	1.37756e+07	0		0	0.4	0	0	2.06634e+08	0	2.5		0	2022-10-17	0.616562		1	0	0	0.6	0	0	1	0.399963	1.12971	375400	0.011778	0		1.00043	0.999907	0.000285823	0.000209758	0.000284818	00:00:00	249815	2022-10-17			3.35139e+08	2022-10-17	9.22935e+06	1
2022-10-18	1.37756e+07	0		0	0.4	0	0	2.06634e+08	0	2.5		0	2022-10-18	0.616551		1	0	0	0.6	0	0	1	0.400133	1.12971	375700	0.011778	0		1.00043	1.00033	0.00028536	0.000209282	0.000284354	00:00:00	249815	2022-10-18			3.35144e+08	2022-10-18	9.32177e+06	1
2022-10-19	1.37756e+07	0		0	0.4	0	0	2.06634e+08	0	2.5		0	2022-10-19	0.616541		1	0	0	0.6	0	0	1	0.400302	1.12971	376000	0.011778	0		1.00042	1.00075	0.000284898	0.000208808	0.000283891	00:00:00	249815	2022-10-19			3.3515e+08	2022-10-19	9.413e+06	1
2022-10-20	1.37756e+07	0		0	0.4	0	0	2.06634e+08	0	2.5		0	2022-10-20	0.616531		1	0	0	0.6	0	0	1	0.400468	1.12971	376300	0.011778	0		1.00041	1.00117	0.000284437	0.000208335	0.000283429	00:00:00	249815	2022-10-20			3.35155e+08	2022-10-20	9.50286e+06	1
2022-10-21	1.37756e+07	0		0	0.4	0	0	2.06634e+08	0	2.5		0	2022-10-21	0.616521		1	0	0	0.6	0	0	1	0.400631	1.12971	376600	0.011778	0		1.00041	1.00158	0.000283977	0.000207863	0.000282968	00:00:00	249815	2022-10-21			3.35161e+08	2022-10-21	9.59121e+06	1
2022-10-22	1.37756e+07	0		0	0.4	0	0	2.06634e+08	0	2.5		0	2022-10-22	0.616511		1	0	0	0.6	0	0	1	0.400791	1.12971	376900	0.011778	0		1.0004	1.00198	0.000283517	0.000207392	0.000282507	00:00:00	249815	2022-10-22			3.35166e+08	2022-10-22	9.67789e+06	1
2022-10-23	1.37756e+07	0		0	0.4	0	0	2.06634e+08	0	2.5		0	2022-10-23	0.616501		1	0	0	0.6	0	0	1	0.400948	1.12971	377200	0.011778	0		1.00039	1.00237	0.000283058	0.000206922	0.000282047	00:00:00	249815	2022-10-23			3.35172e+08	2022-10-23	9.76279e+06	1
2022-10-24	1.37756e+07	0		0	0.4	0	0	2.06634e+08	0	2.5		0	2022-10-24	0.616491		1	0	0	0.6	0	0	1	0.401102	1.12971	377500	0.011778	0		1.00038	1.00275	0.000282601	0.000206453	0.000281589	00:00:00	249815	2022-10-24			3.35177e+08	2022-10-24	9.84578e+06	1
2022-10-25	1.37756e+07	0		0	0.4	0	0	2.06634e+08	0	2.5		0	2022-10-25	0.61648		1	0	0	0.6	0	0	1	0.401252	1.12971	377800	0.011778	0		1.00037	1.00313	0.000282143	0.000205985	0.000281131	00:00:00	249815	2022-10-25			3.35183e+08	2022-10-25	9.92674e+06	1
2022-10-26	1.37756e+07	0		0	0.4	0	0	2.06634e+08	0	2.5		0	2022-10-26	0.61647		1	0	0	0.6	0	0	1	0.401398	1.12971	378100	0.011778	0		1.00036	1.0035	0.000281687	0.000205519	0.000280673	00:00:00	249815	2022-10-26			3.35188e+08	2022-10-26	1.00056e+07	1
2022-10-27	1.37756e+07	0		0	0.4	0	0	2.06634e+08	0	2.5		0	2022-10-27	0.61646		1	0	0	0.6	0	0	1	0.401541	1.12971	378400	0.011778	0		1.00035	1.00385	0.000281232	0.000205053	0.000280217	00:00:00	249815	2022-10-27			3.35194e+08	2022-10-27	1.00823e+07	1
2022-10-28	1.37756e+07	0		0	0.4	0	0	2.06634e+08	0	2.5		0	2022-10-28	0.61645		1	0	0	0.6	0	0	1	0.401679	1.12971	378700	0.011778	0		1.00034	1.0042	0.000280777	0.000204589	0.000279761	00:00:00	249815	2022-10-28			3.35199e+08	2022-10-28	1.01567e+07	1
2022-10-29	1.37756e+07	0		0	0.4	0	0	2.06634e+08	0	2.5		0	2022-10-29	0.61644		1	0	0	0.6	0	0	1	0.401814	1.12971	379000	0.011778	0		1.00033	1.00453	0.000280323	0.000204125	0.000279306	00:00:00	249815	2022-10-29			3.35205e+08	2022-10-29	1.02288e+07	1
2022-10-30	1.37756e+07	0		0	0.4	0	0	2.06634e+08	0	2.5		0	2022-10-30	0.61643		1	0	0	0.6	0	0	1	0.401944	1.12971	379300	0.011778	0		1.00032	1.00486	0.00027987	0.000203663	0.000278852	00:00:00	249815	2022-10-30			3.3521e+08	2022-10-30	1.02985e+07	1
2022-10-31	1.37756e+07	0		0	0.4	0	0	2.06634e+08	0	2.5		0	2022-10-31	0.61642		1	0	0	0.6	0	0	1	0.40207	1.12971	379600	0.011778	0		1.00031	1.00518	0.000279418	0.000203202	0.000278399	00:00:00	249815	2022-10-31			3.35216e+08	2022-10-31	1.03659e+07	1
2022-11-01	1.37756e+07	0		0	0.4	0	0	2.06634e+08	0	2.5		0	2022-11-01	0.61641		1	0	0	0.6	0	0	1	0.402192	1.12971	379900	0.011778	0		1.0003	1.00548	0.000278967	0.000202742	0.000277947	00:00:00	249815	2022-11-01			3.35221e+08	2022-11-01	1.04309e+07	1
2022-11-02	1.37756e+07	0		0	0.4	0	0	2.06634e+08	0	2.5		0	2022-11-02	0.616399		1	0	0	0.6	0	0	1	0.40231	1.12971	380200	0.011778	0		1.00029	1.00577	0.000278516	0.000202283	0.000277495	00:00:00	249815	2022-11-02			3.35227e+08	2022-11-02	1.04934e+07	1
2022-11-03	1.37756e+07	0		0	0.4	0	0	2.06634e+08	0	2.5		0	2022-11-03	0.616389		1	0	0	0.6	0	0	1	0.402423	1.12971	380500	0.011778	0		1.00028	1.00606	0.000278066	0.000201825	0.000277045	00:00:00	249815	2022-11-03			3.35232e+08	2022-11-03	1.05536e+07	1
2022-11-04	1.37756e+07	0		0	0.4	0	0	2.06634e+08	0	2.5		0	2022-11-04	0.616379		1	0	0	0.6	0	0	1	0.402533	1.12971	380800	0.011778	0		1.00027	1.00633	0.000277617	0.000201369	0.000276595	00:00:00	249815	2022-11-04			3.35238e+08	2022-11-04	1.06114e+07	1
2022-11-05	1.37756e+07	0		0	0.4	0	0	2.06634e+08	0	2.5		0	2022-11-05	0.616369		1	0	0	0.6	0	0	1	0.402638	1.12971	381100	0.011778	0		1.00026	1.00659	0.000277169	0.000200913	0.000276145	00:00:00	249815	2022-11-05			3.35243e+08	2022-11-05	1.06668e+07	1
2022-11-06	1.37756e+07	0		0	0.4	0	0	2.06634e+08	0	2.5		0	2022-11-06	0.616359		1	0	0	0.6	0	0	1	0.402739	1.12971	381400	0.011778	0		1.00025	1.00685	0.000276721	0.000200459	0.000275697	00:00:00	249815	2022-11-06			3.35249e+08	2022-11-06	1.07199e+07	1
2022-11-07	1.37756e+07	0		0	0.4	0	0	2.06634e+08	0	2.5		0	2022-11-07	0.616349		1	0	0	0.6	0	0	1	0.402836	1.12971	381700	0.011778	0		1.00024	1.00709	0.000276275	0.000200005	0.000275249	00:00:00	249815	2022-11-07			3.35254e+08	2022-11-07	1.07707e+07	1
2022-11-08	1.37756e+07	0		0	0.4	0	0	2.06634e+08	0	2.5		0	2022-11-08	0.616339		1	0	0	0.6	0	0	1	0.40293	1.12971	382000	0.011778	0		1.00023	1.00732	0.000275829	0.000199553	0.000274803	00:00:00	249815	2022-11-08			3.3526e+08	2022-11-08	1.08192e+07	1
2022-11-09	1.37756e+07	0		0	0.4	0	0	2.06634e+08	0	2.5		0	2022-11-09	0.616329		1	0	0	0.6	0	0	1	0.403019	1.12971	382300	0.011778	0		1.00022	1.00755	0.000275384	0.000199101	0.000274357	00:00:00	249815	2022-11-09			3.35265e+08	2022-11-09	1.08656e+07	1
2022-11-10	1.37756e+07	0		0	0.4	0	0	2.06634e+08	0	2.5		0	2022-11-10	0.616318		1	0	0	0.6	0	0	1	0.403105	1.12971	382600	0.011778	0		1.00021	1.00776	0.000274939	0.000198651	0.000273911	00:00:00	249815	2022-11-10			3.35271e+08	2022-11-10	1.09098e+07	1
2022-11-11	1.37756e+07	0		0	0.4	0	0	2.06634e+08	0	2.5		0	2022-11-11	0.616308		1	0	0	0.6	0	0	1	0.403187	1.12971	382900	0.011778	0		1.0002	1.00797	0.000274496	0.000198202	0.000273467	00:00:00	249815	2022-11-11			3.35276e+08	2022-11-11	1.09518e+07	1
2022-11-12	1.37756e+07	0		0	0.4	0	0	2.06634e+08	0	2.5		0	2022-11-12	0.616298		1	0	0	0.6	0	0	1	0.403265	1.12971	383200	0.011778	0		1.00019	1.00816	0.000274053	0.000197754	0.000273023	00:00:00	249815	2022-11-12			3.35282e+08	2022-11-12	1.09919e+07	1
2022-11-13	1.37756e+07	0		0	0.4	0	0	2.06634e+08	0	2.5		0	2022-11-13	0.616288		1	0	0	0.6	0	0	1	0.40334	1.12971	383500	0.011778	0		1.00019	1.00835	0.000273611	0.000197306	0.00027258	00:00:00	249815	2022-11-13			3.35288e+08	2022-11-13	1.103e+07	1
2022-11-14	1.37756e+07	0		0	0.4	0	0	2.06634e+08	0	2.5		0	2022-11-14	0.616278		1	0	0	0.6	0	0	1	0.403412	1.12971	383800	0.011778	0		1.00018	1.00853	0.00027317	0.00019686	0.000272138	00:00:00	249815	2022-11-14			3.35293e+08	2022-11-14	1.10662e+07	1
2022-11-15	1.37756e+07	0		0	0.4	0	0	2.06634e+08	0	2.5		0	2022-11-15	0.616268		1	0	0	0.6	0	0	1	0.403481	1.12971	384100	0.011778	0		1.00017	1.0087	0.000272729	0.000196415	0.000271697	00:00:00	249815	2022-11-15			3.35299e+08	2022-11-15	1.11005e+07	1
2022-11-16	1.37756e+07	0		0	0.4	0	0	2.06634e+08	0	2.5		0	2022-11-16	0.616258		1	0	0	0.6	0	0	1	0.403547	1.12971	384400	0.011778	0		1.00016	1.00887	0.00027229	0.000195972	0.000271256	00:00:00	249815	2022-11-16			3.35304e+08	2022-11-16	1.11331e+07	1
2022-11-17	1.37756e+07	0		0	0.4	0	0	2.06634e+08	0	2.5		0	2022-11-17	0.616247		1	0	0	0.6	0	0	1	0.403609	1.12971	384700	0.011778	0		1.00016	1.00902	0.000271851	0.000195529	0.000270817	00:00:00	249815	2022-11-17			3.3531e+08	2022-11-17	1.1164e+07	1
2022-11-18	1.37756e+07	0		0	0.4	0	0	2.06634e+08	0	2.5		0	2022-11-18	0.616237		1	0	0	0.6	0	0	1	0.403669	1.12971	385000	0.011778	0		1.00015	1.00917	0.000271413	0.000195087	0.000270378	00:00:00	249815	2022-11-18			3.35315e+08	2022-11-18	1.11933e+07	1
2022-11-19	1.37756e+07	0		0	0.4	0	0	2.06634e+08	0	2.5		0	2022-11-19	0.616227		1	0	0	0.6	0	0	1	0.403726	1.12971	385300	0.011778	0		1.00014	1.00932	0.000270975	0.000194646	0.000269939	00:00:00	249815	2022-11-19			3.35321e+08	2022-11-19	1.1221e+07	1
2022-11-20	1.37756e+07	0		0	0.4	0	0	2.06634e+08	0	2.5		0	2022-11-20	0.616217		1	0	0	0.6	0	0	1	0.403781	1.12971	385600	0.011778	0		1.00014	1.00945	0.000270539	0.000194206	0.000269502	00:00:00	249815	2022-11-20			3.35326e+08	2022-11-20	1.12472e+07	1
2022-11-21	1.37756e+07	0		0	0.4	0	0	2.06634e+08	0	2.5		0	2022-11-21	0.616207		1	0	0	0.6	0	0	1	0.403833	1.12971	385900	0.011778	0		1.00013	1.00958	0.000270103	0.000193767	0.000269065	00:00:00	249815	2022-11-21			3.35332e+08	2022-11-21	1.12719e+07	1
2022-11-22	1.37756e+07	0		0	0.4	0	0	2.06634e+08	0	2.5		0	2022-11-22	0.616197		1	0	0	0.6	0	0	1	0.403882	1.12971	386200	0.011778	0		1.00012	1.00971	0.000269668	0.00019333	0.000268629	00:00:00	249815	2022-11-22			3.35337e+08	2022-11-22	1.12953e+07	1
2022-11-23	1.37756e+07	0		0	0.4	0	0	2.06634e+08	0	2.5		0	2022-11-23	0.616187		1	0	0	0.6	0	0	1	0.40393	1.12971	386500	0.011778	0		1.00012	1.00982	0.000269234	0.000192893	0.000268194	00:00:00	249815	2022-11-23			3.35343e+08	2022-11-23	1.13174e+07	1
2022-11-24	1.37756e+07	0		0	0.4	0	0	2.06634e+08	0	2.5		0	2022-11-24	0.616177		1	0	0	0.6	0	0	1	0.403975	1.12971	386800	0.011778	0		1.00011	1.00994	0.0002688	0.000192457	0.00026776	00:00:00	249815	2022-11-24			3.35348e+08	2022-11-24	1.13383e+07	1
2022-11-25	1.37756e+07	0		0	0.4	0	0	2.06634e+08	0	2.5		0	2022-11-25	0.616166		1	0	0	0.6	0	0	1	0.404019	1.12971	387100	0.011778	0		1.00011	1.01005	0.000268367	0.000192023	0.000267326	00:00:00	249815	2022-11-25			3.35354e+08	2022-11-25	1.13579e+07	1
2022-11-26	1.37756e+07	0		0	0.4	0	0	2.06634e+08	0	2.5		0	2022-11-26	0.616156		1	0	0	0.6	0	0	1	0.40406	1.12971	387400	0.011778	0		1.0001	1.01015	0.000267935	0.000191589	0.000266893	00:00:00	249815	2022-11-26			3.35359e+08	2022-11-26	1.13765e+07	1
2022-11-27	1.37756e+07	0		0	0.4	0	0	2.06634e+08	0	2.5		0	2022-11-27	0.616146		1	0	0	0.6	0	0	1	0.404099	1.12971	387700	0.011778	0		1.0001	1.01025	0.000267504	0.000191157	0.000266461	00:00:00	249815	2022-11-27			3.35365e+08	2022-11-27	1.1394e+07	1
2022-11-28	1.37756e+07	0		0	0.4	0	0	2.06634e+08	0	2.5		0	2022-11-28	0.616136		1	0	0	0.6	0	0	1	0.404137	1.12971	388000	0.011778	0		1.00009	1.01034	0.000267074	0.000190725	0.00026603	00:00:00	249815	2022-11-28			3.3537e+08	2022-11-28	1.14105e+07	1
2022-11-29	1.37756e+07	0		0	0.4	0	0	2.06634e+08	0	2.5		0	2022-11-29	0.616126		1	0	0	0.6	0	0	1	0.404173	1.12971	388300	0.011778	0		1.00009	1.01043	0.000266644	0.000190295	0.0002656	00:00:00	249815	2022-11-29			3.35376e+08	2022-11-29	1.1426e+07	1
2022-11-30	1.37756e+07	0		0	0.4	0	0	2.06634e+08	0	2.5		0	2022-11-30	0.616116		1	0	0	0.6	0	0	1	0.404208	1.12971	388600	0.011778	0		1.00009	1.01052	0.000266215	0.000189865	0.00026517	00:00:00	249815	2022-11-30			3.35381e+08	2022-11-30	1.14406e+07	1
2022-12-01	1.37756e+07	0		0	0.4	0	0	2.06634e+08	0	2.5		0	2022-12-01	0.616106		1	0	0	0.6	0	0	1	0.404242	1.12971	388900	0.011778	0		1.00008	1.01061	0.000265787	0.000189437	0.000264741	00:00:00	249815	2022-12-01			3.35387e+08	2022-12-01	1.14549e+07	1
2022-12-02	1.37756e+07	0		0	0.4	0	0	2.06634e+08	0	2.5		0	2022-12-02	0.616096		1	0	0	0.6	0	0	1	0.404275	1.12971	389200	0.011778	0		1.00008	1.01069	0.000265359	0.000189009	0.000264312	00:00:00	249815	2022-12-02			3.35392e+08	2022-12-02	1.14686e+07	1
2022-12-03	1.37756e+07	0		0	0.4	0	0	2.06634e+08	0	2.5		0	2022-12-03	0.616085		1	0	0	0.6	0	0	1	0.404307	1.12971	389500	0.011778	0		1.00008	1.01077	0.000264932	0.000188583	0.000263885	00:00:00	249815	2022-12-03			3.35398e+08	2022-12-03	1.14817e+07	1
2022-12-04	1.37756e+07	0		0	0.4	0	0	2.06634e+08	0	2.5		0	2022-12-04	0.616075		1	0	0	0.6	0	0	1	0.404338	1.12971	389800	0.011778	0		1.00008	1.01085	0.000264506	0.000188157	0.000263458	00:00:00	249815	2022-12-04			3.35403e+08	2022-12-04	1.14944e+07	1
2022-12-05	1.37756e+07	0		0	0.4	0	0	2.06634e+08	0	2.5		0	2022-12-05	0.616065		1	0	0	0.6	0	0	1	0.404369	1.12971	390100	0.011778	0		1.00008	1.01092	0.000264081	0.000187733	0.000263032	00:00:00	249815	2022-12-05			3.35409e+08	2022-12-05	1.15066e+07	1
2022-12-06	1.37756e+07	0		0	0.4	0	0	2.06634e+08	0	2.5		0	2022-12-06	0.616055		1	0	0	0.6	0	0	1	0.404399	1.12971	390400	0.011778	0		1.00007	1.011	0.000263657	0.000187309	0.000262607	00:00:00	249815	2022-12-06			3.35414e+08	2022-12-06	1.15185e+07	1
2022-12-07	1.37756e+07	0		0	0.4	0	0	2.06634e+08	0	2.5		0	2022-12-07	0.616045		1	0	0	0.6	0	0	1	0.404428	1.12971	390700	0.011778	0		1.00007	1.01107	0.000263233	0.000186887	0.000262182	00:00:00	249815	2022-12-07			3.3542e+08	2022-12-07	1.153e+07	1
2022-12-08	1.37756e+07	0		0	0.4	0	0	2.06634e+08	0	2.5		0	2022-12-08	0.616035		1	0	0	0.6	0	0	1	0.404456	1.12971	391000	0.011778	0		1.00007	1.01114	0.00026281	0.000186465	0.000261758	00:00:00	249815	2022-12-08			3.35425e+08	2022-12-08	1.15411e+07	1
2022-12-09	1.37756e+07	0		0	0.4	0	0	2.06634e+08	0	2.5		0	2022-12-09	0.616025		1	0	0	0.6	0	0	1	0.404484	1.12971	391300	0.011778	0		1.00007	1.01121	0.000262387	0.000186045	0.000261335	00:00:00	249815	2022-12-09			3.35431e+08	2022-12-09	1.1552e+07	1
2022-12-10	1.37756e+07	0		0	0.4	0	0	2.06634e+08	0	2.5		0	2022-12-10	0.616015		1	0	0	0.6	0	0	1	0.404512	1.12971	391600	0.011778	0		1.00007	1.01128	0.000261966	0.000185625	0.000260913	00:00:00	249815	2022-12-10			3.35436e+08	2022-12-10	1.15625e+07	1
2022-12-11	1.37756e+07	0		0	0.4	0	0	2.06634e+08	0	2.5		0	2022-12-11	0.616004		1	0	0	0.6	0	0	1	0.404539	1.12971	391900	0.011778	0		1.00007	1.01135	0.000261545	0.000185207	0.000260491	00:00:00	249815	2022-12-11			3.35442e+08	2022-12-11	1.15728e+07	1
2022-12-12	1.37756e+07	0			0.4	0	0	2.06634e+08	0	2.5		0	2022-12-12	0.615994		1	0	0	0.6	0	0	1	0.404566	1.12971	392200	0.011778	0		1.00007	1.01141	0.000261545	0.000185207	0.000260491	00:00:00	249815	2022-12-12			3.35447e+08	2022-12-12	1.15827e+07	1
2022-12-13	1.37756e+07	0			0.4	0	0	2.06634e+08	0	2.5		0	2022-12-13	0.615984		1	0	0	0.6	0	0	1	0.404592	1.12971	392500	0.011778	0		1.00006	1.01148	0.000261545	0.000185207	0.000260491	00:00:00	249815	2022-12-13			3.35453e+08	2022-12-13	1.15924e+07	1
2022-12-14	1.37756e+07	0			0.4	0	0	2.06634e+08	0	2.5		0	2022-12-14	0.615974		1	0	0	0.6	0	0	1	0.404617	1.12971	392800	0.011778	0		1.00006	1.01154	0.000261545	0.000185207	0.000260491	00:00:00	249815	2022-12-14			3.35458e+08	2022-12-14	1.16019e+07	1
2022-12-15	1.37756e+07	0			0.4	0	0	2.06634e+08	0	2.5		0	2022-12-15	0.615964		1	0	0	0.6	0	0	1	0.404643	1.12971	393100	0.011778	0		1.00006	1.01161	0.000261545	0.000185207	0.000260491	00:00:00	249815	2022-12-15			3.35464e+08	2022-12-15	1.16111e+07	1
2022-12-16	1.37756e+07	0			0.4	0	0	2.06634e+08	0	2.5		0	2022-12-16	0.615954		1	0	0	0.6	0	0	1	0.404668	1.12971	393400	0.011778	0		1.00006	1.01167	0.000261545	0.000185207	0.000260491	00:00:00	249815	2022-12-16			3.35469e+08	2022-12-16	1.16201e+07	1
2022-12-17	1.37756e+07	0			0.4	0	0	2.06634e+08	0	2.5		0	2022-12-17	0.615944		1	0	0	0.6	0	0	1	0.404692	1.12971	393700	0.011778	0		1.00006	1.01173	0.000261545	0.000185207	0.000260491	00:00:00	249815	2022-12-17			3.35475e+08	2022-12-17	1.16288e+07	1
2022-12-18	1.37756e+07	0			0.4	0	0	2.06634e+08	0	2.5		0	2022-12-18	0.615934		1	0	0	0.6	0	0	1	0.404716	1.12971	394000	0.011778	0		1.00006	1.01179	0.000261545	0.000185207	0.000260491	00:00:00	249815	2022-12-18			3.3548e+08	2022-12-18	1.16374e+07	1
2022-12-19	1.37756e+07	0			0.4	0	0	2.06634e+08	0	2.5		0	2022-12-19	0.615923		1	0	0	0.6	0	0	1	0.40474	1.12971	394300	0.011778	0		1.00006	1.01185	0.000261545	0.000185207	0.000260491	00:00:00	249815	2022-12-19			3.35486e+08	2022-12-19	1.16457e+07	1
2022-12-20	1.37756e+07	0			0.4	0	0	2.06634e+08	0	2.5		0	2022-12-20	0.615913		1	0	0	0.6	0	0	1	0.404763	1.12971	394600	0.011778	0		1.00006	1.01191	0.000261545	0.000185207	0.000260491	00:00:00	249815	2022-12-20			3.35492e+08	2022-12-20	1.16538e+07	1
2022-12-21	1.37756e+07	0			0.4	0	0	2.06634e+08	0	2.5		0	2022-12-21	0.615903		1	0	0	0.6	0	0	1	0.404786	1.12971	394900	0.011778	0		1.00006	1.01197	0.000261545	0.000185207	0.000260491	00:00:00	249815	2022-12-21			3.35497e+08	2022-12-21	1.16617e+07	1
2022-12-22	1.37756e+07	0			0.4	0	0	2.06634e+08	0	2.5		0	2022-12-22	0.615893		1	0	0	0.6	0	0	1	0.404809	1.12971	395200	0.011778	0		1.00006	1.01202	0.000261545	0.000185207	0.000260491	00:00:00	249815	2022-12-22			3.35503e+08	2022-12-22	1.16694e+07	1
2022-12-23	1.37756e+07	0			0.4	0	0	2.06634e+08	0	2.5		0	2022-12-23	0.615883		1	0	0	0.6	0	0	1	0.404831	1.12971	395500	0.011778	0		1.00006	1.01208	0.000261545	0.000185207	0.000260491	00:00:00	249815	2022-12-23			3.35508e+08	2022-12-23	1.16769e+07	1
2022-12-24	1.37756e+07	0			0.4	0	0	2.06634e+08	0	2.5		0	2022-12-24	0.615873		1	0	0	0.6	0	0	1	0.404853	1.12971	395800	0.011778	0		1.00005	1.01213	0.000261545	0.000185207	0.000260491	00:00:00	249815	2022-12-24			3.35514e+08	2022-12-24	1.16842e+07	1
2022-12-25	1.37756e+07	0			0.4	0	0	2.06634e+08	0	2.5		0	2022-12-25	0.615863		1	0	0	0.6	0	0	1	0.404875	1.12971	396100	0.011778	0		1.00005	1.01219	0.000261545	0.000185207	0.000260491	00:00:00	249815	2022-12-25			3.35519e+08	2022-12-25	1.16913e+07	1
2022-12-26	1.37756e+07	0			0.4	0	0	2.06634e+08	0	2.5		0	2022-12-26	0.615853		1	0	0	0.6	0	0	1	0.404896	1.12971	396400	0.011778	0		1.00005	1.01224	0.000261545	0.000185207	0.000260491	00:00:00	249815	2022-12-26			3.35525e+08	2022-12-26	1.16983e+07	1
2022-12-27	1.37756e+07	0			0.4	0	0	2.06634e+08	0	2.5		0	2022-12-27	0.615842		1	0	0	0.6	0	0	1	0.404917	1.12971	396700	0.011778	0		1.00005	1.01229	0.000261545	0.000185207	0.000260491	00:00:00	249815	2022-12-27			3.3553e+08	2022-12-27	1.1705e+07	1
2022-12-28	1.37756e+07	0			0.4	0	0	2.06634e+08	0	2.5		0	2022-12-28	0.615832		1	0	0	0.6	0	0	1	0.404938	1.12971	397000	0.011778	0		1.00005	1.01234	0.000261545	0.000185207	0.000260491	00:00:00	249815	2022-12-28			3.35536e+08	2022-12-28	1.17117e+07	1
2022-12-29	1.37756e+07	0			0.4	0	0	2.06634e+08	0	2.5		0	2022-12-29	0.615822		1	0	0	0.6	0	0	1	0.404958	1.12971	397300	0.011778	0		1.00005	1.0124	0.000261545	0.000185207	0.000260491	00:00:00	249815	2022-12-29			3.35541e+08	2022-12-29	1.17181e+07	1
2022-12-30	1.37756e+07	0			0.4	0	0	2.06634e+08	0	2.5		0	2022-12-30	0.615812		1	0	0	0.6	0	0	1	0.404979	1.12971	397600	0.011778	0		1.00005	1.01245	0.000261545	0.000185207	0.000260491	00:00:00	249815	2022-12-30			3.35547e+08	2022-12-30	1.17243e+07	1
2022-12-31	1.37756e+07	0			0.4	0	0	2.06634e+08	0	2.5		0	2022-12-31	0.615802		1	0	0	0.6	0	0	1	0.404999	1.12971	397900	0.011778	0		1.00005	1.0125	0.000261545	0.000185207	0.000260491	00:00:00	249815	2022-12-31			3.35552e+08	2022-12-31	1.17305e+07	1
2023-01-01	1.37756e+07	0			0.4	0	0	2.06634e+08	0	2.5		0	2023-01-01	0.615792		1	0	0	0.6	0	0	1	0.405018	1.12971	398200	0.011778	0		1.00005	1.01255	0.000261545	0.000185207	0.000260491	00:00:00	249815	2023-01-01			3.35558e+08	2023-01-01	1.17364e+07	1
2023-01-02	1.37756e+07	0			0.4	0	0	2.06634e+08	0	2.5		0	2023-01-02	0.615782		1	0	0	0.6	0	0	1	0.405038	1.12971	398500	0.011778	0		1.00005	1.01259	0.000261545	0.000185207	0.000260491	00:00:00	249815	2023-01-02			3.35563e+08	2023-01-02	1.17422e+07	1
2023-01-03	1.37756e+07	0			0.4	0	0	2.06634e+08	0	2.5		0	2023-01-03	0.615772		1	0	0	0.6	0	0	1	0.405057	1.12971	398800	0.011778	0		1.00005	1.01264	0.000261545	0.000185207	0.000260491	00:00:00	249815	2023-01-03			3.35569e+08	2023-01-03	1.17478e+07	1
2023-01-04	1.37756e+07	0			0.4	0	0	2.06634e+08	0	2.5		0	2023-01-04	0.615761		1	0	0	0.6	0	0	1	0.405076	1.12971	399100	0.011778	0		1.00005	1.01269	0.000261545	0.000185207	0.000260491	00:00:00	249815	2023-01-04			3.35574e+08	2023-01-04	1.17533e+07	1
2023-01-05	1.37756e+07	0			0.4	0	0	2.06634e+08	0	2.5		0	2023-01-05	0.615751		1	0	0	0.6	0	0	1	0.405094	1.12971	399400	0.011778	0		1.00005	1.01274	0.000261545	0.000185207	0.000260491	00:00:00	249815	2023-01-05			3.3558e+08	2023-01-05	1.17587e+07	1
2023-01-06	1.37756e+07	0			0.4	0	0	2.06634e+08	0	2.5		0	2023-01-06	0.615741		1	0	0	0.6	0	0	1	0.405112	1.12971	399700	0.011778	0		1.00005	1.01278	0.000261545	0.000185207	0.000260491	00:00:00	249815	2023-01-06			3.35585e+08	2023-01-06	1.17639e+07	1
2023-01-07	1.37756e+07	0			0.4	0	0	2.06634e+08	0	2.5		0	2023-01-07	0.615731		1	0	0	0.6	0	0	1	0.405131	1.12971	400000	0.011778	0		1.00004	1.01283	0.000261545	0.000185207	0.000260491	00:00:00	249815	2023-01-07			3.35591e+08	2023-01-07	1.17689e+07	1
2023-01-08	1.37756e+07	0			0.4	0	0	2.06634e+08	0	2.5		0	2023-01-08	0.615721		1	0	0	0.6	0	0	1	0.405149	1.12971	400300	0.011778	0		1.00004	1.01287	0.000261545	0.000185207	0.000260491	00:00:00	249815	2023-01-08			3.35596e+08	2023-01-08	1.17739e+07	1
2023-01-09	1.37756e+07	0			0.4	0	0	2.06634e+08	0	2.5		0	2023-01-09	0.615711		1	0	0	0.6	0	0	1	0.405166	1.12971	400600	0.011778	0		1.00004	1.01292	0.000261545	0.000185207	0.000260491	00:00:00	249815	2023-01-09			3.35602e+08	2023-01-09	1.17787e+07	1
2023-01-10	1.37756e+07	0			0.4	0	0	2.06634e+08	0	2.5		0	2023-01-10	0.615701		1	0	0	0.6	0	0	1	0.405184	1.12971	400900	0.011778	0		1.00004	1.01296	0.000261545	0.000185207	0.000260491	00:00:00	249815	2023-01-10			3.35607e+08	2023-01-10	1.17833e+07	1
2023-01-11	1.37756e+07	0			0.4	0	0	2.06634e+08	0	2.5		0	2023-01-11	0.615691		1	0	0	0.6	0	0	1	0.405201	1.12971	401200	0.011778	0		1.00004	1.013	0.000261545	0.000185207	0.000260491	00:00:00	249815	2023-01-11			3.35613e+08	2023-01-11	1.17879e+07	1
2023-01-12	1.37756e+07	0			0.4	0	0	2.06634e+08	0	2.5		0	2023-01-12	0.61568		1	0	0	0.6	0	0	1	0.405218	1.12971	401500	0.011778	0		1.00004	1.01304	0.000261545	0.000185207	0.000260491	00:00:00	249815	2023-01-12			3.35618e+08	2023-01-12	1.17923e+07	1
2023-01-13	1.37756e+07	0			0.4	0	0	2.06634e+08	0	2.5		0	2023-01-13	0.61567		1	0	0	0.6	0	0	1	0.405235	1.12971	401800	0.011778	0		1.00004	1.01309	0.000261545	0.000185207	0.000260491	00:00:00	249815	2023-01-13			3.35624e+08	2023-01-13	1.17966e+07	1
2023-01-14	1.37756e+07	0			0.4	0	0	2.06634e+08	0	2.5		0	2023-01-14	0.61566		1	0	0	0.6	0	0	1	0.405251	1.12971	402100	0.011778	0		1.00004	1.01313	0.000261545	0.000185207	0.000260491	00:00:00	249815	2023-01-14			3.35629e+08	2023-01-14	1.18008e+07	1
2023-01-15	1.37756e+07	0			0.4	0	0	2.06634e+08	0	2.5		0	2023-01-15	0.61565		1	0	0	0.6	0	0	1	0.405268	1.12971	402400	0.011778	0		1.00004	1.01317	0.000261545	0.000185207	0.000260491	00:00:00	249815	2023-01-15			3.35635e+08	2023-01-15	1.18049e+07	1
2023-01-16	1.37756e+07	0			0.4	0	0	2.06634e+08	0	2.5		0	2023-01-16	0.61564		1	0	0	0.6	0	0	1	0.405284	1.12971	402700	0.011778	0		1.00004	1.01321	0.000261545	0.000185207	0.000260491	00:00:00	249815	2023-01-16			3.3564e+08	2023-01-16	1.18088e+07	1
2023-01-17	1.37756e+07	0			0.4	0	0	2.06634e+08	0	2.5		0	2023-01-17	0.61563		1	0	0	0.6	0	0	1	0.4053	1.12971	403000	0.011778	0		1.00004	1.01325	0.000261545	0.000185207	0.000260491	00:00:00	249815	2023-01-17			3.35646e+08	2023-01-17	1.18127e+07	1
2023-01-18	1.37756e+07	0			0.4	0	0	2.06634e+08	0	2.5		0	2023-01-18	0.61562		1	0	0	0.6	0	0	1	0.405316	1.12971	403300	0.011778	0		1.00004	1.01329	0.000261545	0.000185207	0.000260491	00:00:00	249815	2023-01-18			3.35651e+08	2023-01-18	1.18164e+07	1
2023-01-19	1.37756e+07	0			0.4	0	0	2.06634e+08	0	2.5		0	2023-01-19	0.61561		1	0	0	0.6	0	0	1	0.405331	1.12971	403600	0.011778	0		1.00004	1.01333	0.000261545	0.000185207	0.000260491	00:00:00	249815	2023-01-19			3.35657e+08	2023-01-19	1.18201e+07	1
2023-01-20	1.37756e+07	0			0.4	0	0	2.06634e+08	0	2.5		0	2023-01-20	0.615599		1	0	0	0.6	0	0	1	0.405347	1.12971	403900	0.011778	0		1.00004	1.01337	0.000261545	0.000185207	0.000260491	00:00:00	249815	2023-01-20			3.35663e+08	2023-01-20	1.18236e+07	1
2023-01-21	1.37756e+07	0			0.4	0	0	2.06634e+08	0	2.5		0	2023-01-21	0.615589		1	0	0	0.6	0	0	1	0.405362	1.12971	404200	0.011778	0		1.00004	1.01341	0.000261545	0.000185207	0.000260491	00:00:00	249815	2023-01-21			3.35668e+08	2023-01-21	1.1827e+07	1
2023-01-22	1.37756e+07	0			0.4	0	0	2.06634e+08	0	2.5		0	2023-01-22	0.615579		1	0	0	0.6	0	0	1	0.405377	1.12971	404500	0.011778	0		1.00004	1.01344	0.000261545	0.000185207	0.000260491	00:00:00	249815	2023-01-22			3.35674e+08	2023-01-22	1.18304e+07	1
2023-01-23	1.37756e+07	0			0.4	0	0	2.06634e+08	0	2.5		0	2023-01-23	0.615569		1	0	0	0.6	0	0	1	0.405392	1.12971	404800	0.011778	0		1.00004	1.01348	0.000261545	0.000185207	0.000260491	00:00:00	249815	2023-01-23			3.35679e+08	2023-01-23	1.18336e+07	1
2023-01-24	1.37756e+07	0			0.4	0	0	2.06634e+08	0	2.5		0	2023-01-24	0.615559		1	0	0	0.6	0	0	1	0.405407	1.12971	405100	0.011778	0		1.00004	1.01352	0.000261545	0.000185207	0.000260491	00:00:00	249815	2023-01-24			3.35685e+08	2023-01-24	1.18368e+07	1
2023-01-25	1.37756e+07	0			0.4	0	0	2.06634e+08	0	2.5		0	2023-01-25	0.615549		1	0	0	0.6	0	0	1	0.405422	1.12971	405400	0.011778	0		1.00004	1.01355	0.000261545	0.000185207	0.000260491	00:00:00	249815	2023-01-25			3.3569e+08	2023-01-25	1.18398e+07	1
2023-01-26	1.37756e+07	0			0.4	0	0	2.06634e+08	0	2.5		0	2023-01-26	0.615539		1	0	0	0.6	0	0	1	0.405437	1.12971	405700	0.011778	0		1.00004	1.01359	0.000261545	0.000185207	0.000260491	00:00:00	249815	2023-01-26			3.35696e+08	2023-01-26	1.18428e+07	1
2023-01-27	1.37756e+07	0			0.4	0	0	2.06634e+08	0	2.5		0	2023-01-27	0.615529		1	0	0	0.6	0	0	1	0.405451	1.12971	406000	0.011778	0		1.00004	1.01363	0.000261545	0.000185207	0.000260491	00:00:00	249815	2023-01-27			3.35701e+08	2023-01-27	1.18457e+07	1
2023-01-28	1.37756e+07	0			0.4	0	0	2.06634e+08	0	2.5		0	2023-01-28	0.615519		1	0	0	0.6	0	0	1	0.405465	1.12971	406300	0.011778	0		1.00004	1.01366	0.000261545	0.000185207	0.000260491	00:00:00	249815	2023-01-28			3.35707e+08	2023-01-28	1.18485e+07	1
2023-01-29	1.37756e+07	0			0.4	0	0	2.06634e+08	0	2.5		0	2023-01-29	0.615508		1	0	0	0.6	0	0	1	0.405479	1.12971	406600	0.011778	0		1.00003	1.0137	0.000261545	0.000185207	0.000260491	00:00:00	249815	2023-01-29			3.35712e+08	2023-01-29	1.18513e+07	1
2023-01-30	1.37756e+07	0			0.4	0	0	2.06634e+08	0	2.5		0	2023-01-30	0.615498		1	0	0	0.6	0	0	1	0.405493	1.12971	406900	0.011778	0		1.00003	1.01373	0.000261545	0.000185207	0.000260491	00:00:00	249815	2023-01-30			3.35718e+08	2023-01-30	1.18539e+07	1
2023-01-31	1.37756e+07	0			0.4	0	0	2.06634e+08	0	2.5		0	2023-01-31	0.615488		1	0	0	0.6	0	0	1	0.405507	1.12971	407200	0.011778	0		1.00003	1.01377	0.000261545	0.000185207	0.000260491	00:00:00	249815	2023-01-31			3.35723e+08	2023-01-31	1.18565e+07	1
2023-02-01	1.37756e+07	0			0.4	0	0	2.06634e+08	0	2.5		0	2023-02-01	0.615478		1	0	0	0.6	0	0	1	0.405521	1.12971	407500	0.011778	0		1.00003	1.0138	0.000261545	0.000185207	0.000260491	00:00:00	249815	2023-02-01			3.35729e+08	2023-02-01	1.18592e+07	1
2023-02-02	1.37756e+07	0			0.4	0	0	2.06634e+08	0	2.5		0	2023-02-02	0.615468		1	0	0	0.6	0	0	1	0.405535	1.12971	407800	0.011778	0		1.00003	1.01384	0.000261545	0.000185207	0.000260491	00:00:00	249815	2023-02-02			3.35734e+08	2023-02-02	1.18619e+07	1
2023-02-03	1.37756e+07	0			0.4	0	0	2.06634e+08	0	2.5		0	2023-02-03	0.615458		1	0	0	0.6	0	0	1	0.405549	1.12971	408100	0.011778	0		1.00003	1.01387	0.000261545	0.000185207	0.000260491	00:00:00	249815	2023-02-03			3.3574e+08	2023-02-03	1.18646e+07	1
2023-02-04	1.37756e+07	0			0.4	0	0	2.06634e+08	0	2.5		0	2023-02-04	0.615448		1	0	0	0.6	0	0	1	0.405563	1.12971	408400	0.011778	0		1.00003	1.01391	0.000261545	0.000185207	0.000260491	00:00:00	249815	2023-02-04			3.35745e+08	2023-02-04	1.18673e+07	1
2023-02-05	1.37756e+07	0			0.4	0	0	2.06634e+08	0	2.5		0	2023-02-05	0.615438		1	0	0	0.6	0	0	1	0.405578	1.12971	408700	0.011778	0		1.00003	1.01394	0.000261545	0.000185207	0.000260491	00:00:00	249815	2023-02-05			3.35751e+08	2023-02-05	1.18701e+07	1
2023-02-06	1.37756e+07	0			0.4	0	0	2.06634e+08	0	2.5		0	2023-02-06	0.615427		1	0	0	0.6	0	0	1	0.405592	1.12971	409000	0.011778	0		1.00004	1.01398	0.000261545	0.000185207	0.000260491	00:00:00	249815	2023-02-06			3.35756e+08	2023-02-06	1.18729e+07	1
2023-02-07	1.37756e+07	0			0.4	0	0	2.06634e+08	0	2.5		0	2023-02-07	0.615417		1	0	0	0.6	0	0	1	0.405606	1.12971	409300	0.011778	0		1.00004	1.01402	0.000261545	0.000185207	0.000260491	00:00:00	249815	2023-02-07			3.35762e+08	2023-02-07	1.18758e+07	1
2023-02-08	1.37756e+07	0			0.4	0	0	2.06634e+08	0	2.5		0	2023-02-08	0.615407		1	0	0	0.6	0	0	1	0.405621	1.12971	409600	0.011778	0		1.00004	1.01405	0.000261545	0.000185207	0.000260491	00:00:00	249815	2023-02-08			3.35767e+08	2023-02-08	1.18788e+07	1
2023-02-09	1.37756e+07	0			0.4	0	0	2.06634e+08	0	2.5		0	2023-02-09	0.615397		1	0	0	0.6	0	0	1	0.405636	1.12971	409900	0.011778	0		1.00004	1.01409	0.000261545	0.000185207	0.000260491	00:00:00	249815	2023-02-09			3.35773e+08	2023-02-09	1.18819e+07	1
2023-02-10	1.37756e+07	0			0.4	0	0	2.06634e+08	0	2.5		0	2023-02-10	0.615387		1	0	0	0.6	0	0	1	0.40565	1.12971	410200	0.011778	0		1.00004	1.01413	0.000261545	0.000185207	0.000260491	00:00:00	249815	2023-02-10			3.35778e+08	2023-02-10	1.18851e+07	1
2023-02-11	1.37756e+07	0			0.4	0	0	2.06634e+08	0	2.5		0	2023-02-11	0.615377		1	0	0	0.6	0	0	1	0.405665	1.12971	410500	0.011778	0		1.00004	1.01416	0.000261545	0.000185207	0.000260491	00:00:00	249815	2023-02-11			3.35784e+08	2023-02-11	1.18884e+07	1
2023-02-12	1.37756e+07	0			0.4	0	0	2.06634e+08	0	2.5		0	2023-02-12	0.615367		1	0	0	0.6	0	0	1	0.405681	1.12971	410800	0.011778	0		1.00004	1.0142	0.000261545	0.000185207	0.000260491	00:00:00	249815	2023-02-12			3.35789e+08	2023-02-12	1.18917e+07	1
2023-02-13	1.37756e+07	0			0.4	0	0	2.06634e+08	0	2.5		0	2023-02-13	0.615357		1	0	0	0.6	0	0	1	0.405696	1.12971	411100	0.011778	0		1.00004	1.01424	0.000261545	0.000185207	0.000260491	00:00:00	249815	2023-02-13			3.35795e+08	2023-02-13	1.18952e+07	1
2023-02-14	1.37756e+07	0			0.4	0	0	2.06634e+08	0	2.5		0	2023-02-14	0.615347		1	0	0	0.6	0	0	1	0.405712	1.12971	411400	0.011778	0		1.00004	1.01428	0.000261545	0.000185207	0.000260491	00:00:00	249815	2023-02-14			3.358e+08	2023-02-14	1.18989e+07	1
2023-02-15	1.37756e+07	0			0.4	0	0	2.06634e+08	0	2.5		0	2023-02-15	0.615336		1	0	0	0.6	0	0	1	0.405728	1.12971	411700	0.011778	0		1.00004	1.01432	0.000261545	0.000185207	0.000260491	00:00:00	249815	2023-02-15			3.35806e+08	2023-02-15	1.19026e+07	1
2023-02-16	1.37756e+07	0			0.4	0	0	2.06634e+08	0	2.5		0	2023-02-16	0.615326		1	0	0	0.6	0	0	1	0.405744	1.12971	412000	0.011778	0		1.00004	1.01436	0.000261545	0.000185207	0.000260491	00:00:00	249815	2023-02-16			3.35812e+08	2023-02-16	1.19065e+07	1
2023-02-17	1.37756e+07	0			0.4	0	0	2.06634e+08	0	2.5		0	2023-02-17	0.615316		1	0	0	0.6	0	0	1	0.40576	1.12971	412300	0.011778	0		1.00004	1.0144	0.000261545	0.000185207	0.000260491	00:00:00	249815	2023-02-17			3.35817e+08	2023-02-17	1.19105e+07	1
2023-02-18	1.37756e+07	0			0.4	0	0	2.06634e+08	0	2.5		0	2023-02-18	0.615306		1	0	0	0.6	0	0	1	0.405776	1.12971	412600	0.011778	0		1.00004	1.01444	0.000261545	0.000185207	0.000260491	00:00:00	249815	2023-02-18			3.35823e+08	2023-02-18	1.19147e+07	1
2023-02-19	1.37756e+07	0			0.4	0	0	2.06634e+08	0	2.5		0	2023-02-19	0.615296		1	0	0	0.6	0	0	1	0.405793	1.12971	412900	0.011778	0		1.00004	1.01448	0.000261545	0.000185207	0.000260491	00:00:00	249815	2023-02-19			3.35828e+08	2023-02-19	1.19191e+07	1
2023-02-20	1.37756e+07	0			0.4	0	0	2.06634e+08	0	2.5		0	2023-02-20	0.615286		1	0	0	0.6	0	0	1	0.40581	1.12971	413200	0.011778	0		1.00004	1.01453	0.000261545	0.000185207	0.000260491	00:00:00	249815	2023-02-20			3.35834e+08	2023-02-20	1.19236e+07	1
2023-02-21	1.37756e+07	0			0.4	0	0	2.06634e+08	0	2.5		0	2023-02-21	0.615276		1	0	0	0.6	0	0	1	0.405828	1.12971	413500	0.011778	0		1.00004	1.01457	0.000261545	0.000185207	0.000260491	00:00:00	249815	2023-02-21			3.35839e+08	2023-02-21	1.19282e+07	1
2023-02-22	1.37756e+07	0			0.4	0	0	2.06634e+08	0	2.5		0	2023-02-22	0.615266		1	0	0	0.6	0	0	1	0.405846	1.12971	413800	0.011778	0		1.00004	1.01461	0.000261545	0.000185207	0.000260491	00:00:00	249815	2023-02-22			3.35845e+08	2023-02-22	1.19331e+07	1
2023-02-23	1.37756e+07	0			0.4	0	0	2.06634e+08	0	2.5		0	2023-02-23	0.615256		1	0	0	0.6	0	0	1	0.405864	1.12971	414100	0.011778	0		1.00004	1.01466	0.000261545	0.000185207	0.000260491	00:00:00	249815	2023-02-23			3.3585e+08	2023-02-23	1.19381e+07	1
2023-02-24	1.37756e+07	0			0.4	0	0	2.06634e+08	0	2.5		0	2023-02-24	0.615245		1	0	0	0.6	0	0	1	0.405882	1.12971	414400	0.011778	0		1.00005	1.01471	0.000261545	0.000185207	0.000260491	00:00:00	249815	2023-02-24			3.35856e+08	2023-02-24	1.19434e+07	1
2023-02-25	1.37756e+07	0			0.4	0	0	2.06634e+08	0	2.5		0	2023-02-25	0.615235		1	0	0	0.6	0	0	1	0.405901	1.12971	414700	0.011778	0		1.00005	1.01475	0.000261545	0.000185207	0.000260491	00:00:00	249815	2023-02-25			3.35861e+08	2023-02-25	1.19488e+07	1
2023-02-26	1.37756e+07	0			0.4	0	0	2.06634e+08	0	2.5		0	2023-02-26	0.615225		1	0	0	0.6	0	0	1	0.40592	1.12971	415000	0.011778	0		1.00005	1.0148	0.000261545	0.000185207	0.000260491	00:00:00	249815	2023-02-26			3.35867e+08	2023-02-26	1.19545e+07	1
2023-02-27	1.37756e+07	0			0.4	0	0	2.06634e+08	0	2.5		0	2023-02-27	0.615215		1	0	0	0.6	0	0	1	0.405939	1.12971	415300	0.011778	0		1.00005	1.01485	0.000261545	0.000185207	0.000260491	00:00:00	249815	2023-02-27			3.35872e+08	2023-02-27	1.19604e+07	1
2023-02-28	1.37756e+07	0			0.4	0	0	2.06634e+08	0	2.5		0	2023-02-28	0.615205		1	0	0	0.6	0	0	1	0.405959	1.12971	415600	0.011778	0		1.00005	1.0149	0.000261545	0.000185207	0.000260491	00:00:00	249815	2023-02-28			3.35878e+08	2023-02-28	1.19665e+07	1
2023-03-01	1.37756e+07	0			0.4	0	0	2.06634e+08	0	2.5		0	2023-03-01	0.615195		1	0	0	0.6	0	0	1	0.405979	1.12971	415900	0.011778	0		1.00005	1.01495	0.000261545	0.000185207	0.000260491	00:00:00	249815	2023-03-01			3.35883e+08	2023-03-01	1.19728e+07	1
2023-03-02	1.37756e+07	0			0.4	0	0	2.06634e+08	0	2.5		0	2023-03-02	0.615185		1	0	0	0.6	0	0	1	0.406	1.12971	416200	0.011778	0		1.00005	1.015	0.000261545	0.000185207	0.000260491	00:00:00	249815	2023-03-02			3.35889e+08	2023-03-02	1.19794e+07	1
2023-03-03	1.37756e+07	0			0.4	0	0	2.06634e+08	0	2.5		0	2023-03-03	0.615175		1	0	0	0.6	0	0	1	0.406021	1.12971	416500	0.011778	0		1.00005	1.01505	0.000261545	0.000185207	0.000260491	00:00:00	249815	2023-03-03			3.35894e+08	2023-03-03	1.19863e+07	1
2023-03-04	1.37756e+07	0			0.4	0	0	2.06634e+08	0	2.5		0	2023-03-04	0.615164		1	0	0	0.6	0	0	1	0.406043	1.12971	416800	0.011778	0		1.00005	1.01511	0.000261545	0.000185207	0.000260491	00:00:00	249815	2023-03-04			3.359e+08	2023-03-04	1.19934e+07	1
2023-03-05	1.37756e+07	0			0.4	0	0	2.06634e+08	0	2.5		0	2023-03-05	0.615154		1	0	0	0.6	0	0	1	0.406065	1.12971	417100	0.011778	0		1.00005	1.01516	0.000261545	0.000185207	0.000260491	00:00:00	249815	2023-03-05			3.35905e+08	2023-03-05	1.20007e+07	1
2023-03-06	1.37756e+07	0			0.4	0	0	2.06634e+08	0	2.5		0	2023-03-06	0.615144		1	0	0	0.6	0	0	1	0.406087	1.12971	417400	0.011778	0		1.00006	1.01522	0.000261545	0.000185207	0.000260491	00:00:00	249815	2023-03-06			3.35911e+08	2023-03-06	1.20084e+07	1
2023-03-07	1.37756e+07	0			0.4	0	0	2.06634e+08	0	2.5		0	2023-03-07	0.615134		1	0	0	0.6	0	0	1	0.40611	1.12971	417700	0.011778	0		1.00006	1.01528	0.000261545	0.000185207	0.000260491	00:00:00	249815	2023-03-07			3.35916e+08	2023-03-07	1.20164e+07	1
2023-03-08	1.37756e+07	0			0.4	0	0	2.06634e+08	0	2.5		0	2023-03-08	0.615124		1	0	0	0.6	0	0	1	0.406134	1.12971	418000	0.011778	0		1.00006	1.01533	0.000261545	0.000185207	0.000260491	00:00:00	249815	2023-03-08			3.35922e+08	2023-03-08	1.20246e+07	1
2023-03-09	1.37756e+07	0			0.4	0	0	2.06634e+08	0	2.5		0	2023-03-09	0.615114		1	0	0	0.6	0	0	1	0.406158	1.12971	418300	0.011778	0		1.00006	1.01539	0.000261545	0.000185207	0.000260491	00:00:00	249815	2023-03-09			3.35927e+08	2023-03-09	1.20332e+07	1
2023-03-10	1.37756e+07	0			0.4	0	0	2.06634e+08	0	2.5		0	2023-03-10	0.615104		1	0	0	0.6	0	0	1	0.406183	1.12971	418600	0.011778	0		1.00006	1.01546	0.000261545	0.000185207	0.000260491	00:00:00	249815	2023-03-10			3.35933e+08	2023-03-10	1.20421e+07	1
2023-03-11	1.37756e+07	0			0.4	0	0	2.06634e+08	0	2.5		0	2023-03-11	0.615094		1	0	0	0.6	0	0	1	0.406208	1.12971	418900	0.011778	0		1.00006	1.01552	0.000261545	0.000185207	0.000260491	00:00:00	249815	2023-03-11			3.35939e+08	2023-03-11	1.20513e+07	1
2023-03-12	1.37756e+07	0			0.4	0	0	2.06634e+08	0	2.5		0	2023-03-12	0.615084		1	0	0	0.6	0	0	1	0.406233	1.12971	419200	0.011778	0		1.00006	1.01558	0.000261545	0.000185207	0.000260491	00:00:00	249815	2023-03-12			3.35944e+08	2023-03-12	1.20608e+07	1
2023-03-13	1.37756e+07	0			0.4	0	0	2.06634e+08	0	2.5		0	2023-03-13	0.615073		1	0	0	0.6	0	0	1	0.40626	1.12971	419500	0.011778	0		1.00006	1.01565	0.000261545	0.000185207	0.000260491	00:00:00	249815	2023-03-13			3.3595e+08	2023-03-13	1.20707e+07	1
2023-03-14	1.37756e+07	0			0.4	0	0	2.06634e+08	0	2.5		0	2023-03-14	0.615063		1	0	0	0.6	0	0	1	0.406287	1.12971	419800	0.011778	0		1.00007	1.01572	0.000261545	0.000185207	0.000260491	00:00:00	249815	2023-03-14			3.35955e+08	2023-03-14	1.2081e+07	1
2023-03-15	1.37756e+07	0			0.4	0	0	2.06634e+08	0	2.5		0	2023-03-15	0.615053		1	0	0	0.6	0	0	1	0.406314	1.12971	420100	0.011778	0		1.00007	1.01579	0.000261545	0.000185207	0.000260491	00:00:00	249815	2023-03-15			3.35961e+08	2023-03-15	1.20916e+07	1
2023-03-16	1.37756e+07	0			0.4	0	0	2.06634e+08	0	2.5		0	2023-03-16	0.615043		1	0	0	0.6	0	0	1	0.406342	1.12971	420400	0.011778	0		1.00007	1.01586	0.000261545	0.000185207	0.000260491	00:00:00	249815	2023-03-16			3.35966e+08	2023-03-16	1.21026e+07	1
2023-03-17	1.37756e+07	0			0.4	0	0	2.06634e+08	0	2.5		0	2023-03-17	0.615033		1	0	0	0.6	0	0	1	0.406371	1.12971	420700	0.011778	0		1.00007	1.01593	0.000261545	0.000185207	0.000260491	00:00:00	249815	2023-03-17			3.35972e+08	2023-03-17	1.2114e+07	1
2023-03-18	1.37756e+07	0			0.4	0	0	2.06634e+08	0	2.5		0	2023-03-18	0.615023		1	0	0	0.6	0	0	1	0.406401	1.12971	421000	0.011778	0		1.00007	1.016	0.000261545	0.000185207	0.000260491	00:00:00	249815	2023-03-18			3.35977e+08	2023-03-18	1.21257e+07	1
2023-03-19	1.37756e+07	0			0.4	0	0	2.06634e+08	0	2.5		0	2023-03-19	0.615013		1	0	0	0.6	0	0	1	0.406431	1.12971	421300	0.011778	0		1.00007	1.01608	0.000261545	0.000185207	0.000260491	00:00:00	249815	2023-03-19			3.35983e+08	2023-03-19	1.21379e+07	1
2023-03-20	1.37756e+07	0			0.4	0	0	2.06634e+08	0	2.5		0	2023-03-20	0.615003		1	0	0	0.6	0	0	1	0.406462	1.12971	421600	0.011778	0		1.00008	1.01615	0.000261545	0.000185207	0.000260491	00:00:00	249815	2023-03-20			3.35988e+08	2023-03-20	1.21505e+07	1
2023-03-21	1.37756e+07	0			0.4	0	0	2.06634e+08	0	2.5		0	2023-03-21	0.614993		1	0	0	0.6	0	0	1	0.406493	1.12971	421900	0.011778	0		1.00008	1.01623	0.000261545	0.000185207	0.000260491	00:00:00	249815	2023-03-21			3.35994e+08	2023-03-21	1.21636e+07	1
2023-03-22	1.37756e+07	0			0.4	0	0	2.06634e+08	0	2.5		0	2023-03-22	0.614983		1	0	0	0.6	0	0	1	0.406526	1.12971	422200	0.011778	0		1.00008	1.01631	0.000261545	0.000185207	0.000260491	00:00:00	249815	2023-03-22			3.35999e+08	2023-03-22	1.2177e+07	1
2023-03-23	1.37756e+07	0			0.4	0	0	2.06634e+08	0	2.5		0	2023-03-23	0.614972		1	0	0	0.6	0	0	1	0.406559	1.12971	422500	0.011778	0		1.00008	1.0164	0.000261545	0.000185207	0.000260491	00:00:00	249815	2023-03-23			3.36005e+08	2023-03-23	1.21909e+07	1
2023-03-24	1.37756e+07	0			0.4	0	0	2.06634e+08	0	2.5		0	2023-03-24	0.614962		1	0	0	0.6	0	0	1	0.406593	1.12971	422800	0.011778	0		1.00008	1.01648	0.000261545	0.000185207	0.000260491	00:00:00	249815	2023-03-24			3.3601e+08	2023-03-24	1.22053e+07	1
2023-03-25	1.37756e+07	0			0.4	0	0	2.06634e+08	0	2.5		0	2023-03-25	0.614952		1	0	0	0.6	0	0	1	0.406627	1.12971	423100	0.011778	0		1.00009	1.01657	0.000261545	0.000185207	0.000260491	00:00:00	249815	2023-03-25			3.36016e+08	2023-03-25	1.22201e+07	1
2023-03-26	1.37756e+07	0			0.4	0	0	2.06634e+08	0	2.5		0	2023-03-26	0.614942		1	0	0	0.6	0	0	1	0.406663	1.12971	423400	0.011778	0		1.00009	1.01666	0.000261545	0.000185207	0.000260491	00:00:00	249815	2023-03-26			3.36021e+08	2023-03-26	1.22354e+07	1
2023-03-27	1.37756e+07	0			0.4	0	0	2.06634e+08	0	2.5		0	2023-03-27	0.614932		1	0	0	0.6	0	0	1	0.406699	1.12971	423700	0.011778	0		1.00009	1.01675	0.000261545	0.000185207	0.000260491	00:00:00	249815	2023-03-27			3.36027e+08	2023-03-27	1.22511e+07	1
2023-03-28	1.37756e+07	0			0.4	0	0	2.06634e+08	0	2.5		0	2023-03-28	0.614922		1	0	0	0.6	0	0	1	0.406736	1.12971	424000	0.011778	0		1.00009	1.01684	0.000261545	0.000185207	0.000260491	00:00:00	249815	2023-03-28			3.36032e+08	2023-03-28	1.22674e+07	1
2023-03-29	1.37756e+07	0			0.4	0	0	2.06634e+08	0	2.5		0	2023-03-29	0.614912		1	0	0	0.6	0	0	1	0.406774	1.12971	424300	0.011778	0		1.00009	1.01694	0.000261545	0.000185207	0.000260491	00:00:00	249815	2023-03-29			3.36038e+08	2023-03-29	1.22841e+07	1
2023-03-30	1.37756e+07	0			0.4	0	0	2.06634e+08	0	2.5		0	2023-03-30	0.614902		1	0	0	0.6	0	0	1	0.406813	1.12971	424600	0.011778	0		1.0001	1.01703	0.000261545	0.000185207	0.000260491	00:00:00	249815	2023-03-30			3.36043e+08	2023-03-30	1.23013e+07	1
2023-03-31	1.37756e+07	0			0.4	0	0	2.06634e+08	0	2.5		0	2023-03-31	0.614892		1	0	0	0.6	0	0	1	0.406852	1.12971	424900	0.011778	0		1.0001	1.01713	0.000261545	0.000185207	0.000260491	00:00:00	249815	2023-03-31			3.36049e+08	2023-03-31	1.2319e+07	1
2023-04-01	1.37756e+07	0			0.4	0	0	2.06634e+08	0	2.5		0	2023-04-01	0.614881		1	0	0	0.6	0	0	1	0.406893	1.12971	425200	0.011778	0		1.0001	1.01723	0.000261545	0.000185207	0.000260491	00:00:00	249815	2023-04-01			3.36054e+08	2023-04-01	1.23373e+07	1
2023-04-02	1.37756e+07	0			0.4	0	0	2.06634e+08	0	2.5		0	2023-04-02	0.614871		1	0	0	0.6	0	0	1	0.406934	1.12971	425500	0.011778	0		1.0001	1.01734	0.000261545	0.000185207	0.000260491	00:00:00	249815	2023-04-02			3.3606e+08	2023-04-02	1.2356e+07	1
2023-04-03	1.37756e+07	0			0.4	0	0	2.06634e+08	0	2.5		0	2023-04-03	0.614861		1	0	0	0.6	0	0	1	0.406976	1.12971	425800	0.011778	0		1.0001	1.01744	0.000261545	0.000185207	0.000260491	00:00:00	249815	2023-04-03			3.36066e+08	2023-04-03	1.23752e+07	1
2023-04-04	1.37756e+07	0			0.4	0	0	2.06634e+08	0	2.5		0	2023-04-04	0.614851		1	0	0	0.6	0	0	1	0.407019	1.12971	426100	0.011778	0		1.00011	1.01755	0.000261545	0.000185207	0.000260491	00:00:00	249815	2023-04-04			3.36071e+08	2023-04-04	1.2395e+07	1
2023-04-05	1.37756e+07	0			0.4	0	0	2.06634e+08	0	2.5		0	2023-04-05	0.614841		1	0	0	0.6	0	0	1	0.407063	1.12971	426400	0.011778	0		1.00011	1.01766	0.000261545	0.000185207	0.000260491	00:00:00	249815	2023-04-05			3.36077e+08	2023-04-05	1.24152e+07	1
2023-04-06	1.37756e+07	0			0.4	0	0	2.06634e+08	0	2.5		0	2023-04-06	0.614831		1	0	0	0.6	0	0	1	0.407108	1.12971	426700	0.011778	0		1.00011	1.01777	0.000261545	0.000185207	0.000260491	00:00:00	249815	2023-04-06			3.36082e+08	2023-04-06	1.2436e+07	1
2023-04-07	1.37756e+07	0			0.4	0	0	2.06634e+08	0	2.5		0	2023-04-07	0.614821		1	0	0	0.6	0	0	1	0.407153	1.12971	427000	0.011778	0		1.00011	1.01788	0.000261545	0.000185207	0.000260491	00:00:00	249815	2023-04-07			3.36088e+08	2023-04-07	1.24573e+07	1
2023-04-08	1.37756e+07	0			0.4	0	0	2.06634e+08	0	2.5		0	2023-04-08	0.614811		1	0	0	0.6	0	0	1	0.4072	1.12971	427300	0.011778	0		1.00011	1.018	0.000261545	0.000185207	0.000260491	00:00:00	249815	2023-04-08			3.36093e+08	2023-04-08	1.24791e+07	1
2023-04-09	1.37756e+07	0			0.4	0	0	2.06634e+08	0	2.5		0	2023-04-09	0.614801		1	0	0	0.6	0	0	1	0.407247	1.12971	427600	0.011778	0		1.00012	1.01812	0.000261545	0.000185207	0.000260491	00:00:00	249815	2023-04-09			3.36099e+08	2023-04-09	1.25014e+07	1
2023-04-10	1.37756e+07	0			0.4	0	0	2.06634e+08	0	2.5		0	2023-04-10	0.61479		1	0	0	0.6	0	0	1	0.407295	1.12971	427900	0.011778	0		1.00012	1.01824	0.000261545	0.000185207	0.000260491	00:00:00	249815	2023-04-10			3.36104e+08	2023-04-10	1.25242e+07	1
2023-04-11	1.37756e+07	0			0.4	0	0	2.06634e+08	0	2.5		0	2023-04-11	0.61478		1	0	0	0.6	0	0	1	0.407344	1.12971	428200	0.011778	0		1.00012	1.01836	0.000261545	0.000185207	0.000260491	00:00:00	249815	2023-04-11			3.3611e+08	2023-04-11	1.25475e+07	1
2023-04-12	1.37756e+07	0			0.4	0	0	2.06634e+08	0	2.5		0	2023-04-12	0.61477		1	0	0	0.6	0	0	1	0.407394	1.12971	428500	0.011778	0		1.00012	1.01849	0.000261545	0.000185207	0.000260491	00:00:00	249815	2023-04-12			3.36115e+08	2023-04-12	1.25713e+07	1
2023-04-13	1.37756e+07	0			0.4	0	0	2.06634e+08	0	2.5		0	2023-04-13	0.61476		1	0	0	0.6	0	0	1	0.407445	1.12971	428800	0.011778	0		1.00012	1.01861	0.000261545	0.000185207	0.000260491	00:00:00	249815	2023-04-13			3.36121e+08	2023-04-13	1.25956e+07	1
2023-04-14	1.37756e+07	0			0.4	0	0	2.06634e+08	0	2.5		0	2023-04-14	0.61475		1	0	0	0.6	0	0	1	0.407496	1.12971	429100	0.011778	0		1.00013	1.01874	0.000261545	0.000185207	0.000260491	00:00:00	249815	2023-04-14			3.36126e+08	2023-04-14	1.26204e+07	1
2023-04-15	1.37756e+07	0			0.4	0	0	2.06634e+08	0	2.5		0	2023-04-15	0.61474		1	0	0	0.6	0	0	1	0.407549	1.12971	429400	0.011778	0		1.00013	1.01887	0.000261545	0.000185207	0.000260491	00:00:00	249815	2023-04-15			3.36132e+08	2023-04-15	1.26456e+07	1
2023-04-16	1.37756e+07	0			0.4	0	0	2.06634e+08	0	2.5		0	2023-04-16	0.61473		1	0	0	0.6	0	0	1	0.407602	1.12971	429700	0.011778	0		1.00013	1.019	0.000261545	0.000185207	0.000260491	00:00:00	249815	2023-04-16			3.36137e+08	2023-04-16	1.26713e+07	1
2023-04-17	1.37756e+07	0			0.4	0	0	2.06634e+08	0	2.5		0	2023-04-17	0.61472		1	0	0	0.6	0	0	1	0.407655	1.12971	430000	0.011778	0		1.00013	1.01914	0.000261545	0.000185207	0.000260491	00:00:00	249815	2023-04-17			3.36143e+08	2023-04-17	1.26974e+07	1
2023-04-18	1.37756e+07	0			0.4	0	0	2.06634e+08	0	2.5		0	2023-04-18	0.61471		1	0	0	0.6	0	0	1	0.40771	1.12971	430300	0.011778	0		1.00013	1.01927	0.000261545	0.000185207	0.000260491	00:00:00	249815	2023-04-18			3.36148e+08	2023-04-18	1.27239e+07	1
2023-04-19	1.37756e+07	0			0.4	0	0	2.06634e+08	0	2.5		0	2023-04-19	0.6147		1	0	0	0.6	0	0	1	0.407765	1.12971	430600	0.011778	0		1.00014	1.01941	0.000261545	0.000185207	0.000260491	00:00:00	249815	2023-04-19			3.36154e+08	2023-04-19	1.27509e+07	1
2023-04-20	1.37756e+07	0			0.4	0	0	2.06634e+08	0	2.5		0	2023-04-20	0.614689		1	0	0	0.6	0	0	1	0.407821	1.12971	430900	0.011778	0		1.00014	1.01955	0.000261545	0.000185207	0.000260491	00:00:00	249815	2023-04-20			3.36159e+08	2023-04-20	1.27782e+07	1
2023-04-21	1.37756e+07	0			0.4	0	0	2.06634e+08	0	2.5		0	2023-04-21	0.614679		1	0	0	0.6	0	0	1	0.407877	1.12971	431200	0.011778	0		1.00014	1.01969	0.000261545	0.000185207	0.000260491	00:00:00	249815	2023-04-21			3.36165e+08	2023-04-21	1.28059e+07	1
2023-04-22	1.37756e+07	0			0.4	0	0	2.06634e+08	0	2.5		0	2023-04-22	0.614669		1	0	0	0.6	0	0	1	0.407934	1.12971	431500	0.011778	0		1.00014	1.01984	0.000261545	0.000185207	0.000260491	00:00:00	249815	2023-04-22			3.36171e+08	2023-04-22	1.2834e+07	1
2023-04-23	1.37756e+07	0			0.4	0	0	2.06634e+08	0	2.5		0	2023-04-23	0.614659		1	0	0	0.6	0	0	1	0.407992	1.12971	431800	0.011778	0		1.00014	1.01998	0.000261545	0.000185207	0.000260491	00:00:00	249815	2023-04-23			3.36176e+08	2023-04-23	1.28624e+07	1
2023-04-24	1.37756e+07	0			0.4	0	0	2.06634e+08	0	2.5		0	2023-04-24	0.614649		1	0	0	0.6	0	0	1	0.40805	1.12971	432100	0.011778	0		1.00014	1.02012	0.000261545	0.000185207	0.000260491	00:00:00	249815	2023-04-24			3.36182e+08	2023-04-24	1.28911e+07	1
2023-04-25	1.37756e+07	0			0.4	0	0	2.06634e+08	0	2.5		0	2023-04-25	0.614639		1	0	0	0.6	0	0	1	0.408108	1.12971	432400	0.011778	0		1.00014	1.02027	0.000261545	0.000185207	0.000260491	00:00:00	249815	2023-04-25			3.36187e+08	2023-04-25	1.29202e+07	1
2023-04-26	1.37756e+07	0			0.4	0	0	2.06634e+08	0	2.5		0	2023-04-26	0.614629		1	0	0	0.6	0	0	1	0.408167	1.12971	432700	0.011778	0		1.00014	1.02042	0.000261545	0.000185207	0.000260491	00:00:00	249815	2023-04-26			3.36193e+08	2023-04-26	1.29494e+07	1
2023-04-27	1.37756e+07	0			0.4	0	0	2.06634e+08	0	2.5		0	2023-04-27	0.614619		1	0	0	0.6	0	0	1	0.408227	1.12971	433000	0.011778	0		1.00015	1.02057	0.000261545	0.000185207	0.000260491	00:00:00	249815	2023-04-27			3.36198e+08	2023-04-27	1.2979e+07	1
2023-04-28	1.37756e+07	0			0.4	0	0	2.06634e+08	0	2.5		0	2023-04-28	0.614609		1	0	0	0.6	0	0	1	0.408287	1.12971	433300	0.011778	0		1.00015	1.02072	0.000261545	0.000185207	0.000260491	00:00:00	249815	2023-04-28			3.36204e+08	2023-04-28	1.30087e+07	1
2023-04-29	1.37756e+07	0			0.4	0	0	2.06634e+08	0	2.5		0	2023-04-29	0.614598		1	0	0	0.6	0	0	1	0.408347	1.12971	433600	0.011778	0		1.00015	1.02087	0.000261545	0.000185207	0.000260491	00:00:00	249815	2023-04-29			3.36209e+08	2023-04-29	1.30386e+07	1
2023-04-30	1.37756e+07	0			0.4	0	0	2.06634e+08	0	2.5		0	2023-04-30	0.614588		1	0	0	0.6	0	0	1	0.408407	1.12971	433900	0.011778	0		1.00015	1.02102	0.000261545	0.000185207	0.000260491	00:00:00	249815	2023-04-30			3.36215e+08	2023-04-30	1.30687e+07	1
2023-05-01	1.37756e+07	0			0.4	0	0	2.06634e+08	0	2.5		0	2023-05-01	0.614578		1	0	0	0.555556	0	0	1	0.408462	1.12971	434200	0.011778	0		1.00014	1.02116	0.000261545	0.000185207	0.000260491	00:00:00	249815	2023-05-01			3.3622e+08	2023-05-01	1.30959e+07	0.9
2023-05-02	1.37756e+07	0			0.4	0	0	2.06634e+08	0	2.5		0	2023-05-02	0.614568		1	0	0	0.555556	0	0	1	0.408517	1.12971	434500	0.011778	0		1.00013	1.02129	0.000261545	0.000185207	0.000260491	00:00:00	249815	2023-05-02			3.36226e+08	2023-05-02	1.31227e+07	0.9
2023-05-03	1.37756e+07	0			0.4	0	0	2.06634e+08	0	2.5		0	2023-05-03	0.614558		1	0	0	0.555556	0	0	1	0.408571	1.12971	434800	0.011778	0		1.00013	1.02143	0.000261545	0.000185207	0.000260491	00:00:00	249815	2023-05-03			3.36231e+08	2023-05-03	1.31491e+07	0.9
2023-05-04	1.37756e+07	0			0.4	0	0	2.06634e+08	0	2.5		0	2023-05-04	0.614548		1	0	0	0.555556	0	0	1	0.408624	1.12971	435100	0.011778	0		1.00013	1.02156	0.000261545	0.000185207	0.000260491	00:00:00	249815	2023-05-04			3.36237e+08	2023-05-04	1.31749e+07	0.9
2023-05-05	1.37756e+07	0			0.4	0	0	2.06634e+08	0	2.5		0	2023-05-05	0.614538		1	0	0	0.555556	0	0	1	0.408676	1.12971	435400	0.011778	0		1.00013	1.02169	0.000261545	0.000185207	0.000260491	00:00:00	249815	2023-05-05			3.36242e+08	2023-05-05	1.32001e+07	0.9
2023-05-06	1.37756e+07	0			0.4	0	0	2.06634e+08	0	2.5		0	2023-05-06	0.614528		1	0	0	0.555556	0	0	1	0.408727	1.12971	435700	0.011778	0		1.00012	1.02182	0.000261545	0.000185207	0.000260491	00:00:00	249815	2023-05-06			3.36248e+08	2023-05-06	1.32245e+07	0.9
2023-05-07	1.37756e+07	0			0.4	0	0	2.06634e+08	0	2.5		0	2023-05-07	0.614518		1	0	0	0.555556	0	0	1	0.408776	1.12971	436000	0.011778	0		1.00012	1.02194	0.000261545	0.000185207	0.000260491	00:00:00	249815	2023-05-07			3.36253e+08	2023-05-07	1.32479e+07	0.9
2023-05-08	1.37756e+07	0			0.4	0	0	2.06634e+08	0	2.5		0	2023-05-08	0.614508		1	0	0	0.555556	0	0	1	0.408824	1.12971	436300	0.011778	0		1.00012	1.02206	0.000261545	0.000185207	0.000260491	00:00:00	249815	2023-05-08			3.36259e+08	2023-05-08	1.32707e+07	0.9
2023-05-09	1.37756e+07	0			0.4	0	0	2.06634e+08	0	2.5		0	2023-05-09	0.614497		1	0	0	0.555556	0	0	1	0.408871	1.12971	436600	0.011778	0		1.00011	1.02218	0.000261545	0.000185207	0.000260491	00:00:00	249815	2023-05-09			3.36264e+08	2023-05-09	1.32929e+07	0.9
2023-05-10	1.37756e+07	0			0.4	0	0	2.06634e+08	0	2.5		0	2023-05-10	0.614487		1	0	0	0.555556	0	0	1	0.408916	1.12971	436900	0.011778	0		1.00011	1.02229	0.000261545	0.000185207	0.000260491	00:00:00	249815	2023-05-10			3.3627e+08	2023-05-10	1.33144e+07	0.9
2023-05-11	1.37756e+07	0			0.4	0	0	2.06634e+08	0	2.5		0	2023-05-11	0.614477		1	0	0	0.555556	0	0	1	0.408961	1.12971	437200	0.011778	0		1.00011	1.0224	0.000261545	0.000185207	0.000260491	00:00:00	249815	2023-05-11			3.36276e+08	2023-05-11	1.33352e+07	0.9
2023-05-12	1.37756e+07	0			0.4	0	0	2.06634e+08	0	2.5		0	2023-05-12	0.614467		1	0	0	0.555556	0	0	1	0.409004	1.12971	437500	0.011778	0		1.00011	1.02251	0.000261545	0.000185207	0.000260491	00:00:00	249815	2023-05-12			3.36281e+08	2023-05-12	1.33553e+07	0.9
2023-05-13	1.37756e+07	0			0.4	0	0	2.06634e+08	0	2.5		0	2023-05-13	0.614457		1	0	0	0.555556	0	0	1	0.409046	1.12971	437800	0.011778	0		1.0001	1.02262	0.000261545	0.000185207	0.000260491	00:00:00	249815	2023-05-13			3.36287e+08	2023-05-13	1.33747e+07	0.9
2023-05-14	1.37756e+07	0			0.4	0	0	2.06634e+08	0	2.5		0	2023-05-14	0.614447		1	0	0	0.555556	0	0	1	0.409087	1.12971	438100	0.011778	0		1.0001	1.02272	0.000261545	0.000185207	0.000260491	00:00:00	249815	2023-05-14			3.36292e+08	2023-05-14	1.33934e+07	0.9
2023-05-15	1.37756e+07	0			0.4	0	0	2.06634e+08	0	2.5		0	2023-05-15	0.614437		1	0	0	0.555556	0	0	1	0.409127	1.12971	438400	0.011778	0		1.0001	1.02282	0.000261545	0.000185207	0.000260491	00:00:00	249815	2023-05-15			3.36298e+08	2023-05-15	1.34116e+07	0.9
2023-05-16	1.37756e+07	0			0.4	0	0	2.06634e+08	0	2.5		0	2023-05-16	0.614427		1	0	0	0.555556	0	0	1	0.409166	1.12971	438700	0.011778	0		1.0001	1.02292	0.000261545	0.000185207	0.000260491	00:00:00	249815	2023-05-16			3.36303e+08	2023-05-16	1.34291e+07	0.9
2023-05-17	1.37756e+07	0			0.4	0	0	2.06634e+08	0	2.5		0	2023-05-17	0.614417		1	0	0	0.555556	0	0	1	0.409204	1.12971	439000	0.011778	0		1.00009	1.02301	0.000261545	0.000185207	0.000260491	00:00:00	249815	2023-05-17			3.36309e+08	2023-05-17	1.34459e+07	0.9
2023-05-18	1.37756e+07	0			0.4	0	0	2.06634e+08	0	2.5		0	2023-05-18	0.614407		1	0	0	0.555556	0	0	1	0.409241	1.12971	439300	0.011778	0		1.00009	1.0231	0.000261545	0.000185207	0.000260491	00:00:00	249815	2023-05-18			3.36314e+08	2023-05-18	1.34622e+07	0.9
2023-05-19	1.37756e+07	0			0.4	0	0	2.06634e+08	0	2.5		0	2023-05-19	0.614396		1	0	0	0.555556	0	0	1	0.409277	1.12971	439600	0.011778	0		1.00009	1.02319	0.000261545	0.000185207	0.000260491	00:00:00	249815	2023-05-19			3.3632e+08	2023-05-19	1.34779e+07	0.9
2023-05-20	1.37756e+07	0			0.4	0	0	2.06634e+08	0	2.5		0	2023-05-20	0.614386		1	0	0	0.555556	0	0	1	0.409311	1.12971	439900	0.011778	0		1.00009	1.02328	0.000261545	0.000185207	0.000260491	00:00:00	249815	2023-05-20			3.36325e+08	2023-05-20	1.3493e+07	0.9
2023-05-21	1.37756e+07	0			0.4	0	0	2.06634e+08	0	2.5		0	2023-05-21	0.614376		1	0	0	0.555556	0	0	1	0.409345	1.12971	440200	0.011778	0		1.00008	1.02336	0.000261545	0.000185207	0.000260491	00:00:00	249815	2023-05-21			3.36331e+08	2023-05-21	1.35075e+07	0.9
2023-05-22	1.37756e+07	0			0.4	0	0	2.06634e+08	0	2.5		0	2023-05-22	0.614366		1	0	0	0.555556	0	0	1	0.409378	1.12971	440500	0.011778	0		1.00008	1.02345	0.000261545	0.000185207	0.000260491	00:00:00	249815	2023-05-22			3.36336e+08	2023-05-22	1.35215e+07	0.9
2023-05-23	1.37756e+07	0			0.4	0	0	2.06634e+08	0	2.5		0	2023-05-23	0.614356		1	0	0	0.555556	0	0	1	0.40941	1.12971	440800	0.011778	0		1.00008	1.02353	0.000261545	0.000185207	0.000260491	00:00:00	249815	2023-05-23			3.36342e+08	2023-05-23	1.35349e+07	0.9
2023-05-24	1.37756e+07	0			0.4	0	0	2.06634e+08	0	2.5		0	2023-05-24	0.614346		1	0	0	0.555556	0	0	1	0.409441	1.12971	441100	0.011778	0		1.00008	1.0236	0.000261545	0.000185207	0.000260491	00:00:00	249815	2023-05-24			3.36347e+08	2023-05-24	1.35479e+07	0.9
2023-05-25	1.37756e+07	0			0.4	0	0	2.06634e+08	0	2.5		0	2023-05-25	0.614336		1	0	0	0.555556	0	0	1	0.409472	1.12971	441400	0.011778	0		1.00007	1.02368	0.000261545	0.000185207	0.000260491	00:00:00	249815	2023-05-25			3.36353e+08	2023-05-25	1.35603e+07	0.9
2023-05-26	1.37756e+07	0			0.4	0	0	2.06634e+08	0	2.5		0	2023-05-26	0.614326		1	0	0	0.555556	0	0	1	0.409501	1.12971	441700	0.011778	0		1.00007	1.02375	0.000261545	0.000185207	0.000260491	00:00:00	249815	2023-05-26			3.36358e+08	2023-05-26	1.35723e+07	0.9
2023-05-27	1.37756e+07	0			0.4	0	0	2.06634e+08	0	2.5		0	2023-05-27	0.614316		1	0	0	0.555556	0	0	1	0.40953	1.12971	442000	0.011778	0		1.00007	1.02382	0.000261545	0.000185207	0.000260491	00:00:00	249815	2023-05-27			3.36364e+08	2023-05-27	1.35837e+07	0.9
2023-05-28	1.37756e+07	0			0.4	0	0	2.06634e+08	0	2.5		0	2023-05-28	0.614306		1	0	0	0.555556	0	0	1	0.409558	1.12971	442300	0.011778	0		1.00007	1.02389	0.000261545	0.000185207	0.000260491	00:00:00	249815	2023-05-28			3.3637e+08	2023-05-28	1.35948e+07	0.9
2023-05-29	1.37756e+07	0			0.4	0	0	2.06634e+08	0	2.5		0	2023-05-29	0.614295		1	0	0	0.555556	0	0	1	0.409585	1.12971	442600	0.011778	0		1.00007	1.02396	0.000261545	0.000185207	0.000260491	00:00:00	249815	2023-05-29			3.36375e+08	2023-05-29	1.36053e+07	0.9
2023-05-30	1.37756e+07	0			0.4	0	0	2.06634e+08	0	2.5		0	2023-05-30	0.614285		1	0	0	0.555556	0	0	1	0.409611	1.12971	442900	0.011778	0		1.00006	1.02403	0.000261545	0.000185207	0.000260491	00:00:00	249815	2023-05-30			3.36381e+08	2023-05-30	1.36155e+07	0.9
2023-05-31	1.37756e+07	0			0.4	0	0	2.06634e+08	0	2.5		0	2023-05-31	0.614275		1	0	0	0.555556	0	0	1	0.409637	1.12971	443200	0.011778	0		1.00006	1.02409	0.000261545	0.000185207	0.000260491	00:00:00	249815	2023-05-31			3.36386e+08	2023-05-31	1.36252e+07	0.9
2023-06-01	1.37756e+07	0			0.4	0	0	2.06634e+08	0	2.5		0	2023-06-01	0.614265		1	0	0	0.5	0	0	1	0.409661	1.12971	443500	0.011778	0		1.00006	1.02415	0.000261545	0.000185207	0.000260491	00:00:00	249815	2023-06-01			3.36392e+08	2023-06-01	1.36335e+07	0.8
2023-06-02	1.37756e+07	0			0.4	0	0	2.06634e+08	0	2.5		0	2023-06-02	0.614255		1	0	0	0.5	0	0	1	0.409683	1.12971	443800	0.011778	0		1.00005	1.02421	0.000261545	0.000185207	0.000260491	00:00:00	249815	2023-06-02			3.36397e+08	2023-06-02	1.36413e+07	0.8
2023-06-03	1.37756e+07	0			0.4	0	0	2.06634e+08	0	2.5		0	2023-06-03	0.614245		1	0	0	0.5	0	0	1	0.409705	1.12971	444100	0.011778	0		1.00005	1.02426	0.000261545	0.000185207	0.000260491	00:00:00	249815	2023-06-03			3.36403e+08	2023-06-03	1.36487e+07	0.8
2023-06-04	1.37756e+07	0			0.4	0	0	2.06634e+08	0	2.5		0	2023-06-04	0.614235		1	0	0	0.5	0	0	1	0.409726	1.12971	444400	0.011778	0		1.00005	1.02431	0.000261545	0.000185207	0.000260491	00:00:00	249815	2023-06-04			3.36408e+08	2023-06-04	1.36556e+07	0.8
2023-06-05	1.37756e+07	0			0.4	0	0	2.06634e+08	0	2.5		0	2023-06-05	0.614225		1	0	0	0.5	0	0	1	0.409746	1.12971	444700	0.011778	0		1.00005	1.02436	0.000261545	0.000185207	0.000260491	00:00:00	249815	2023-06-05			3.36414e+08	2023-06-05	1.3662e+07	0.8
2023-06-06	1.37756e+07	0			0.4	0	0	2.06634e+08	0	2.5		0	2023-06-06	0.614215		1	0	0	0.5	0	0	1	0.409765	1.12971	445000	0.011778	0		1.00005	1.02441	0.000261545	0.000185207	0.000260491	00:00:00	249815	2023-06-06			3.36419e+08	2023-06-06	1.36679e+07	0.8
2023-06-07	1.37756e+07	0			0.4	0	0	2.06634e+08	0	2.5		0	2023-06-07	0.614205		1	0	0	0.5	0	0	1	0.409784	1.12971	445300	0.011778	0		1.00005	1.02446	0.000261545	0.000185207	0.000260491	00:00:00	249815	2023-06-07			3.36425e+08	2023-06-07	1.36733e+07	0.8
2023-06-08	1.37756e+07	0			0.4	0	0	2.06634e+08	0	2.5		0	2023-06-08	0.614194		1	0	0	0.5	0	0	1	0.409801	1.12971	445600	0.011778	0		1.00004	1.0245	0.000261545	0.000185207	0.000260491	00:00:00	249815	2023-06-08			3.3643e+08	2023-06-08	1.36784e+07	0.8
2023-06-09	1.37756e+07	0			0.4	0	0	2.06634e+08	0	2.5		0	2023-06-09	0.614184		1	0	0	0.5	0	0	1	0.409819	1.12971	445900	0.011778	0		1.00004	1.02455	0.000261545	0.000185207	0.000260491	00:00:00	249815	2023-06-09			3.36436e+08	2023-06-09	1.36831e+07	0.8
2023-06-10	1.37756e+07	0			0.4	0	0	2.06634e+08	0	2.5		0	2023-06-10	0.614174		1	0	0	0.5	0	0	1	0.409835	1.12971	446200	0.011778	0		1.00004	1.02459	0.000261545	0.000185207	0.000260491	00:00:00	249815	2023-06-10			3.36441e+08	2023-06-10	1.36875e+07	0.8
2023-06-11	1.37756e+07	0			0.4	0	0	2.06634e+08	0	2.5		0	2023-06-11	0.614164		1	0	0	0.5	0	0	1	0.409852	1.12971	446500	0.011778	0		1.00004	1.02463	0.000261545	0.000185207	0.000260491	00:00:00	249815	2023-06-11			3.36447e+08	2023-06-11	1.36915e+07	0.8
2023-06-12	1.37756e+07	0			0.4	0	0	2.06634e+08	0	2.5		0	2023-06-12	0.614154		1	0	0	0.5	0	0	1	0.409867	1.12971	446800	0.011778	0		1.00004	1.02467	0.000261545	0.000185207	0.000260491	00:00:00	249815	2023-06-12			3.36452e+08	2023-06-12	1.36953e+07	0.8
2023-06-13	1.37756e+07	0			0.4	0	0	2.06634e+08	0	2.5		0	2023-06-13	0.614144		1	0	0	0.5	0	0	1	0.409882	1.12971	447100	0.011778	0		1.00004	1.02471	0.000261545	0.000185207	0.000260491	00:00:00	249815	2023-06-13			3.36458e+08	2023-06-13	1.36987e+07	0.8
2023-06-14	1.37756e+07	0			0.4	0	0	2.06634e+08	0	2.5		0	2023-06-14	0.614134		1	0	0	0.5	0	0	1	0.409897	1.12971	447400	0.011778	0		1.00004	1.02474	0.000261545	0.000185207	0.000260491	00:00:00	249815	2023-06-14			3.36464e+08	2023-06-14	1.3702e+07	0.8
2023-06-15	1.37756e+07	0			0.4	0	0	2.06634e+08	0	2.5		0	2023-06-15	0.614124		1	0	0	0.5	0	0	1	0.409911	1.12971	447700	0.011778	0		1.00004	1.02478	0.000261545	0.000185207	0.000260491	00:00:00	249815	2023-06-15			3.36469e+08	2023-06-15	1.3705e+07	0.8
2023-06-16	1.37756e+07	0			0.4	0	0	2.06634e+08	0	2.5		0	2023-06-16	0.614114		1	0	0	0.5	0	0	1	0.409925	1.12971	448000	0.011778	0		1.00003	1.02481	0.000261545	0.000185207	0.000260491	00:00:00	249815	2023-06-16			3.36475e+08	2023-06-16	1.37077e+07	0.8
2023-06-17	1.37756e+07	0			0.4	0	0	2.06634e+08	0	2.5		0	2023-06-17	0.614104		1	0	0	0.5	0	0	1	0.409939	1.12971	448300	0.011778	0		1.00003	1.02485	0.000261545	0.000185207	0.000260491	00:00:00	249815	2023-06-17			3.3648e+08	2023-06-17	1.37103e+07	0.8
2023-06-18	1.37756e+07	0			0.4	0	0	2.06634e+08	0	2.5		0	2023-06-18	0.614094		1	0	0	0.5	0	0	1	0.409952	1.12971	448600	0.011778	0		1.00003	1.02488	0.000261545	0.000185207	0.000260491	00:00:00	249815	2023-06-18			3.36486e+08	2023-06-18	1.37127e+07	0.8
2023-06-19	1.37756e+07	0			0.4	0	0	2.06634e+08	0	2.5		0	2023-06-19	0.614083		1	0	0	0.5	0	0	1	0.409965	1.12971	448900	0.011778	0		1.00003	1.02491	0.000261545	0.000185207	0.000260491	00:00:00	249815	2023-06-19			3.36491e+08	2023-06-19	1.37149e+07	0.8
2023-06-20	1.37756e+07	0			0.4	0	0	2.06634e+08	0	2.5		0	2023-06-20	0.614073		1	0	0	0.5	0	0	1	0.409978	1.12971	449200	0.011778	0		1.00003	1.02495	0.000261545	0.000185207	0.000260491	00:00:00	249815	2023-06-20			3.36497e+08	2023-06-20	1.37169e+07	0.8
2023-06-21	1.37756e+07	0			0.4	0	0	2.06634e+08	0	2.5		0	2023-06-21	0.614063		1	0	0	0.5	0	0	1	0.409991	1.12971	449500	0.011778	0		1.00003	1.02498	0.000261545	0.000185207	0.000260491	00:00:00	249815	2023-06-21			3.36502e+08	2023-06-21	1.37188e+07	0.8
2023-06-22	1.37756e+07	0			0.4	0	0	2.06634e+08	0	2.5		0	2023-06-22	0.614053		1	0	0	0.5	0	0	1	0.410003	1.12971	449800	0.011778	0		1.00003	1.02501	0.000261545	0.000185207	0.000260491	00:00:00	249815	2023-06-22			3.36508e+08	2023-06-22	1.37206e+07	0.8
2023-06-23	1.37756e+07	0			0.4	0	0	2.06634e+08	0	2.5		0	2023-06-23	0.614043		1	0	0	0.5	0	0	1	0.410015	1.12971	450100	0.011778	0		1.00003	1.02504	0.000261545	0.000185207	0.000260491	00:00:00	249815	2023-06-23			3.36513e+08	2023-06-23	1.37222e+07	0.8
2023-06-24	1.37756e+07	0			0.4	0	0	2.06634e+08	0	2.5		0	2023-06-24	0.614033		1	0	0	0.5	0	0	1	0.410027	1.12971	450400	0.011778	0		1.00003	1.02507	0.000261545	0.000185207	0.000260491	00:00:00	249815	2023-06-24			3.36519e+08	2023-06-24	1.37237e+07	0.8
2023-06-25	1.37756e+07	0			0.4	0	0	2.06634e+08	0	2.5		0	2023-06-25	0.614023		1	0	0	0.5	0	0	1	0.410039	1.12971	450700	0.011778	0		1.00003	1.0251	0.000261545	0.000185207	0.000260491	00:00:00	249815	2023-06-25			3.36524e+08	2023-06-25	1.37251e+07	0.8
2023-06-26	1.37756e+07	0			0.4	0	0	2.06634e+08	0	2.5		0	2023-06-26	0.614013		1	0	0	0.5	0	0	1	0.41005	1.12971	451000	0.011778	0		1.00003	1.02513	0.000261545	0.000185207	0.000260491	00:00:00	249815	2023-06-26			3.3653e+08	2023-06-26	1.37264e+07	0.8
2023-06-27	1.37756e+07	0			0.4	0	0	2.06634e+08	0	2.5		0	2023-06-27	0.614003		1	0	0	0.5	0	0	1	0.410061	1.12971	451300	0.011778	0		1.00003	1.02515	0.000261545	0.000185207	0.000260491	00:00:00	249815	2023-06-27			3.36535e+08	2023-06-27	1.37276e+07	0.8
2023-06-28	1.37756e+07	0			0.4	0	0	2.06634e+08	0	2.5		0	2023-06-28	0.613993		1	0	0	0.5	0	0	1	0.410073	1.12971	451600	0.011778	0		1.00003	1.02518	0.000261545	0.000185207	0.000260491	00:00:00	249815	2023-06-28			3.36541e+08	2023-06-28	1.37287e+07	0.8
2023-06-29	1.37756e+07	0			0.4	0	0	2.06634e+08	0	2.5		0	2023-06-29	0.613983		1	0	0	0.5	0	0	1	0.410084	1.12971	451900	0.011778	0		1.00003	1.02521	0.000261545	0.000185207	0.000260491	00:00:00	249815	2023-06-29			3.36547e+08	2023-06-29	1.37297e+07	0.8
2023-06-30	1.37756e+07	0			0.4	0	0	2.06634e+08	0	2.5		0	2023-06-30	0.613972		1	0	0	0.5	0	0	1	0.410095	1.12971	452200	0.011778	0		1.00003	1.02524	0.000261545	0.000185207	0.000260491	00:00:00	249815	2023-06-30			3.36552e+08	2023-06-30	1.37306e+07	0.8
2023-07-01	1.37756e+07	0			0.4	0	0	2.06634e+08	0	2.5		0	2023-07-01	0.613962		1	0	0	0.5	0	0	1	0.410105	1.12971	452500	0.011778	0		1.00003	1.02526	0.000261545	0.000185207	0.000260491	00:00:00	249815	2023-07-01			3.36558e+08	2023-07-01	1.37315e+07	0.8
2023-07-02	1.37756e+07	0			0.4	0	0	2.06634e+08	0	2.5		0	2023-07-02	0.613952		1	0	0	0.5	0	0	1	0.410116	1.12971	452800	0.011778	0		1.00003	1.02529	0.000261545	0.000185207	0.000260491	00:00:00	249815	2023-07-02			3.36563e+08	2023-07-02	1.37323e+07	0.8
2023-07-03	1.37756e+07	0			0.4	0	0	2.06634e+08	0	2.5		0	2023-07-03	0.613942		1	0	0	0.5	0	0	1	0.410127	1.12971	453100	0.011778	0		1.00003	1.02532	0.000261545	0.000185207	0.000260491	00:00:00	249815	2023-07-03			3.36569e+08	2023-07-03	1.37331e+07	0.8
2023-07-04	1.37756e+07	0			0.4	0	0	2.06634e+08	0	2.5		0	2023-07-04	0.613932		1	0	0	0.5	0	0	1	0.410137	1.12971	453400	0.011778	0		1.00003	1.02534	0.000261545	0.000185207	0.000260491	00:00:00	249815	2023-07-04			3.36574e+08	2023-07-04	1.37338e+07	0.8
2023-07-05	1.37756e+07	0			0.4	0	0	2.06634e+08	0	2.5		0	2023-07-05	0.613922		1	0	0	0.5	0	0	1	0.410148	1.12971	453700	0.011778	0		1.00003	1.02537	0.000261545	0.000185207	0.000260491	00:00:00	249815	2023-07-05			3.3658e+08	2023-07-05	1.37344e+07	0.8
2023-07-06	1.37756e+07	0			0.4	0	0	2.06634e+08	0	2.5		0	2023-07-06	0.613912		1	0	0	0.5	0	0	1	0.410158	1.12971	454000	0.011778	0		1.00003	1.02539	0.000261545	0.000185207	0.000260491	00:00:00	249815	2023-07-06			3.36585e+08	2023-07-06	1.3735e+07	0.8
2023-07-07	1.37756e+07	0			0.4	0	0	2.06634e+08	0	2.5		0	2023-07-07	0.613902		1	0	0	0.5	0	0	1	0.410168	1.12971	454300	0.011778	0		1.00002	1.02542	0.000261545	0.000185207	0.000260491	00:00:00	249815	2023-07-07			3.36591e+08	2023-07-07	1.37356e+07	0.8
2023-07-08	1.37756e+07	0			0.4	0	0	2.06634e+08	0	2.5		0	2023-07-08	0.613892		1	0	0	0.5	0	0	1	0.410178	1.12971	454600	0.011778	0		1.00002	1.02545	0.000261545	0.000185207	0.000260491	00:00:00	249815	2023-07-08			3.36596e+08	2023-07-08	1.37361e+07	0.8
2023-07-09	1.37756e+07	0			0.4	0	0	2.06634e+08	0	2.5		0	2023-07-09	0.613882		1	0	0	0.5	0	0	1	0.410188	1.12971	454900	0.011778	0		1.00002	1.02547	0.000261545	0.000185207	0.000260491	00:00:00	249815	2023-07-09			3.36602e+08	2023-07-09	1.37366e+07	0.8
2023-07-10	1.37756e+07	0			0.4	0	0	2.06634e+08	0	2.5		0	2023-07-10	0.613871		1	0	0	0.5	0	0	1	0.410198	1.12971	455200	0.011778	0		1.00002	1.0255	0.000261545	0.000185207	0.000260491	00:00:00	249815	2023-07-10			3.36607e+08	2023-07-10	1.3737e+07	0.8
2023-07-11	1.37756e+07	0			0.4	0	0	2.06634e+08	0	2.5		0	2023-07-11	0.613861		1	0	0	0.5	0	0	1	0.410208	1.12971	455500	0.011778	0		1.00002	1.02552	0.000261545	0.000185207	0.000260491	00:00:00	249815	2023-07-11			3.36613e+08	2023-07-11	1.37374e+07	0.8
2023-07-12	1.37756e+07	0			0.4	0	0	2.06634e+08	0	2.5		0	2023-07-12	0.613851		1	0	0	0.5	0	0	1	0.410218	1.12971	455800	0.011778	0		1.00002	1.02555	0.000261545	0.000185207	0.000260491	00:00:00	249815	2023-07-12			3.36618e+08	2023-07-12	1.37378e+07	0.8
2023-07-13	1.37756e+07	0			0.4	0	0	2.06634e+08	0	2.5		0	2023-07-13	0.613841		1	0	0	0.5	0	0	1	0.410228	1.12971	456100	0.011778	0		1.00002	1.02557	0.000261545	0.000185207	0.000260491	00:00:00	249815	2023-07-13			3.36624e+08	2023-07-13	1.37382e+07	0.8
2023-07-14	1.37756e+07	0			0.4	0	0	2.06634e+08	0	2.5		0	2023-07-14	0.613831		1	0	0	0.5	0	0	1	0.410238	1.12971	456400	0.011778	0		1.00002	1.0256	0.000261545	0.000185207	0.000260491	00:00:00	249815	2023-07-14			3.36629e+08	2023-07-14	1.37385e+07	0.8
2023-07-15	1.37756e+07	0			0.4	0	0	2.06634e+08	0	2.5		0	2023-07-15	0.613821		1	0	0	0.5	0	0	1	0.410248	1.12971	456700	0.011778	0		1.00002	1.02562	0.000261545	0.000185207	0.000260491	00:00:00	249815	2023-07-15			3.36635e+08	2023-07-15	1.37388e+07	0.8
2023-07-16	1.37756e+07	0			0.4	0	0	2.06634e+08	0	2.5		0	2023-07-16	0.613811		1	0	0	0.5	0	0	1	0.410258	1.12971	457000	0.011778	0		1.00002	1.02564	0.000261545	0.000185207	0.000260491	00:00:00	249815	2023-07-16			3.36641e+08	2023-07-16	1.37391e+07	0.8
2023-07-17	1.37756e+07	0			0.4	0	0	2.06634e+08	0	2.5		0	2023-07-17	0.613801		1	0	0	0.5	0	0	1	0.410268	1.12971	457300	0.011778	0		1.00002	1.02567	0.000261545	0.000185207	0.000260491	00:00:00	249815	2023-07-17			3.36646e+08	2023-07-17	1.37393e+07	0.8
2023-07-18	1.37756e+07	0			0.4	0	0	2.06634e+08	0	2.5		0	2023-07-18	0.613791		1	0	0	0.5	0	0	1	0.410277	1.12971	457600	0.011778	0		1.00002	1.02569	0.000261545	0.000185207	0.000260491	00:00:00	249815	2023-07-18			3.36652e+08	2023-07-18	1.37396e+07	0.8
2023-07-19	1.37756e+07	0			0.4	0	0	2.06634e+08	0	2.5		0	2023-07-19	0.613781		1	0	0	0.5	0	0	1	0.410287	1.12971	457900	0.011778	0		1.00002	1.02572	0.000261545	0.000185207	0.000260491	00:00:00	249815	2023-07-19			3.36657e+08	2023-07-19	1.37398e+07	0.8
2023-07-20	1.37756e+07	0			0.4	0	0	2.06634e+08	0	2.5		0	2023-07-20	0.613771		1	0	0	0.5	0	0	1	0.410297	1.12971	458200	0.011778	0		1.00002	1.02574	0.000261545	0.000185207	0.000260491	00:00:00	249815	2023-07-20			3.36663e+08	2023-07-20	1.374e+07	0.8
2023-07-21	1.37756e+07	0			0.4	0	0	2.06634e+08	0	2.5		0	2023-07-21	0.613761		1	0	0	0.5	0	0	1	0.410306	1.12971	458500	0.011778	0		1.00002	1.02577	0.000261545	0.000185207	0.000260491	00:00:00	249815	2023-07-21			3.36668e+08	2023-07-21	1.37402e+07	0.8
2023-07-22	1.37756e+07	0			0.4	0	0	2.06634e+08	0	2.5		0	2023-07-22	0.61375		1	0	0	0.5	0	0	1	0.410316	1.12971	458800	0.011778	0		1.00002	1.02579	0.000261545	0.000185207	0.000260491	00:00:00	249815	2023-07-22			3.36674e+08	2023-07-22	1.37404e+07	0.8
2023-07-23	1.37756e+07	0			0.4	0	0	2.06634e+08	0	2.5		0	2023-07-23	0.61374		1	0	0	0.5	0	0	1	0.410325	1.12971	459100	0.011778	0		1.00002	1.02581	0.000261545	0.000185207	0.000260491	00:00:00	249815	2023-07-23			3.36679e+08	2023-07-23	1.37405e+07	0.8
2023-07-24	1.37756e+07	0			0.4	0	0	2.06634e+08	0	2.5		0	2023-07-24	0.61373		1	0	0	0.5	0	0	1	0.410335	1.12971	459400	0.011778	0		1.00002	1.02584	0.000261545	0.000185207	0.000260491	00:00:00	249815	2023-07-24			3.36685e+08	2023-07-24	1.37407e+07	0.8
2023-07-25	1.37756e+07	0			0.4	0	0	2.06634e+08	0	2.5		0	2023-07-25	0.61372		1	0	0	0.5	0	0	1	0.410345	1.12971	459700	0.011778	0		1.00002	1.02586	0.000261545	0.000185207	0.000260491	00:00:00	249815	2023-07-25			3.3669e+08	2023-07-25	1.37408e+07	0.8
2023-07-26	1.37756e+07	0			0.4	0	0	2.06634e+08	0	2.5		0	2023-07-26	0.61371		1	0	0	0.5	0	0	1	0.410354	1.12971	460000	0.011778	0		1.00002	1.02589	0.000261545	0.000185207	0.000260491	00:00:00	249815	2023-07-26			3.36696e+08	2023-07-26	1.37409e+07	0.8
2023-07-27	1.37756e+07	0			0.4	0	0	2.06634e+08	0	2.5		0	2023-07-27	0.6137		1	0	0	0.5	0	0	1	0.410364	1.12971	460300	0.011778	0		1.00002	1.02591	0.000261545	0.000185207	0.000260491	00:00:00	249815	2023-07-27			3.36701e+08	2023-07-27	1.37411e+07	0.8
2023-07-28	1.37756e+07	0			0.4	0	0	2.06634e+08	0	2.5		0	2023-07-28	0.61369		1	0	0	0.5	0	0	1	0.410373	1.12971	460600	0.011778	0		1.00002	1.02593	0.000261545	0.000185207	0.000260491	00:00:00	249815	2023-07-28			3.36707e+08	2023-07-28	1.37412e+07	0.8
2023-07-29	1.37756e+07	0			0.4	0	0	2.06634e+08	0	2.5		0	2023-07-29	0.61368		1	0	0	0.5	0	0	1	0.410383	1.12971	460900	0.011778	0		1.00002	1.02596	0.000261545	0.000185207	0.000260491	00:00:00	249815	2023-07-29			3.36713e+08	2023-07-29	1.37413e+07	0.8
2023-07-30	1.37756e+07	0			0.4	0	0	2.06634e+08	0	2.5		0	2023-07-30	0.61367		1	0	0	0.5	0	0	1	0.410392	1.12971	461200	0.011778	0		1.00002	1.02598	0.000261545	0.000185207	0.000260491	00:00:00	249815	2023-07-30			3.36718e+08	2023-07-30	1.37414e+07	0.8
2023-07-31	1.37756e+07	0			0.4	0	0	2.06634e+08	0	2.5		0	2023-07-31	0.61366		1	0	0	0.5	0	0	1	0.410401	1.12971	461500	0.011778	0		1.00002	1.026	0.000261545	0.000185207	0.000260491	00:00:00	249815	2023-07-31			3.36724e+08	2023-07-31	1.37415e+07	0.8
2023-08-01	1.37756e+07	0			0.4	0	0	2.06634e+08	0	2.5		0	2023-08-01	0.61365		1	0	0	0.5	0	0	1	0.410411	1.12971	461800	0.011778	0		1.00002	1.02603	0.000261545	0.000185207	0.000260491	00:00:00	249815	2023-08-01			3.36729e+08	2023-08-01	1.37415e+07	0.8
2023-08-02	1.37756e+07	0			0.4	0	0	2.06634e+08	0	2.5		0	2023-08-02	0.613639		1	0	0	0.5	0	0	1	0.41042	1.12971	462100	0.011778	0		1.00002	1.02605	0.000261545	0.000185207	0.000260491	00:00:00	249815	2023-08-02			3.36735e+08	2023-08-02	1.37416e+07	0.8
2023-08-03	1.37756e+07	0			0.4	0	0	2.06634e+08	0	2.5		0	2023-08-03	0.613629		1	0	0	0.5	0	0	1	0.41043	1.12971	462400	0.011778	0		1.00002	1.02607	0.000261545	0.000185207	0.000260491	00:00:00	249815	2023-08-03			3.3674e+08	2023-08-03	1.37417e+07	0.8
2023-08-04	1.37756e+07	0			0.4	0	0	2.06634e+08	0	2.5		0	2023-08-04	0.613619		1	0	0	0.5	0	0	1	0.410439	1.12971	462700	0.011778	0		1.00002	1.0261	0.000261545	0.000185207	0.000260491	00:00:00	249815	2023-08-04			3.36746e+08	2023-08-04	1.37417e+07	0.8
2023-08-05	1.37756e+07	0			0.4	0	0	2.06634e+08	0	2.5		0	2023-08-05	0.613609		1	0	0	0.5	0	0	1	0.410449	1.12971	463000	0.011778	0		1.00002	1.02612	0.000261545	0.000185207	0.000260491	00:00:00	249815	2023-08-05			3.36751e+08	2023-08-05	1.37418e+07	0.8
2023-08-06	1.37756e+07	0			0.4	0	0	2.06634e+08	0	2.5		0	2023-08-06	0.613599		1	0	0	0.5	0	0	1	0.410458	1.12971	463300	0.011778	0		1.00002	1.02615	0.000261545	0.000185207	0.000260491	00:00:00	249815	2023-08-06			3.36757e+08	2023-08-06	1.37419e+07	0.8
2023-08-07	1.37756e+07	0			0.4	0	0	2.06634e+08	0	2.5		0	2023-08-07	0.613589		1	0	0	0.5	0	0	1	0.410467	1.12971	463600	0.011778	0		1.00002	1.02617	0.000261545	0.000185207	0.000260491	00:00:00	249815	2023-08-07			3.36762e+08	2023-08-07	1.37419e+07	0.8
2023-08-08	1.37756e+07	0			0.4	0	0	2.06634e+08	0	2.5		0	2023-08-08	0.613579		1	0	0	0.5	0	0	1	0.410477	1.12971	463900	0.011778	0		1.00002	1.02619	0.000261545	0.000185207	0.000260491	00:00:00	249815	2023-08-08			3.36768e+08	2023-08-08	1.3742e+07	0.8
2023-08-09	1.37756e+07	0			0.4	0	0	2.06634e+08	0	2.5		0	2023-08-09	0.613569		1	0	0	0.5	0	0	1	0.410486	1.12971	464200	0.011778	0		1.00002	1.02622	0.000261545	0.000185207	0.000260491	00:00:00	249815	2023-08-09			3.36773e+08	2023-08-09	1.3742e+07	0.8
2023-08-10	1.37756e+07	0			0.4	0	0	2.06634e+08	0	2.5		0	2023-08-10	0.613559		1	0	0	0.5	0	0	1	0.410496	1.12971	464500	0.011778	0		1.00002	1.02624	0.000261545	0.000185207	0.000260491	00:00:00	249815	2023-08-10			3.36779e+08	2023-08-10	1.3742e+07	0.8
2023-08-11	1.37756e+07	0			0.4	0	0	2.06634e+08	0	2.5		0	2023-08-11	0.613549		1	0	0	0.5	0	0	1	0.410505	1.12971	464800	0.011778	0		1.00002	1.02626	0.000261545	0.000185207	0.000260491	00:00:00	249815	2023-08-11			3.36784e+08	2023-08-11	1.37421e+07	0.8
2023-08-12	1.37756e+07	0			0.4	0	0	2.06634e+08	0	2.5		0	2023-08-12	0.613539		1	0	0	0.5	0	0	1	0.410514	1.12971	465100	0.011778	0		1.00002	1.02629	0.000261545	0.000185207	0.000260491	00:00:00	249815	2023-08-12			3.3679e+08	2023-08-12	1.37421e+07	0.8
2023-08-13	1.37756e+07	0			0.4	0	0	2.06634e+08	0	2.5		0	2023-08-13	0.613529		1	0	0	0.5	0	0	1	0.410524	1.12971	465400	0.011778	0		1.00002	1.02631	0.000261545	0.000185207	0.000260491	00:00:00	249815	2023-08-13			3.36796e+08	2023-08-13	1.37422e+07	0.8
2023-08-14	1.37756e+07	0			0.4	0	0	2.06634e+08	0	2.5		0	2023-08-14	0.613518		1	0	0	0.5	0	0	1	0.410533	1.12971	465700	0.011778	0		1.00002	1.02633	0.000261545	0.000185207	0.000260491	00:00:00	249815	2023-08-14			3.36801e+08	2023-08-14	1.37422e+07	0.8
2023-08-15	1.37756e+07	0			0.4	0	0	2.06634e+08	0	2.5		0	2023-08-15	0.613508		1	0	0	0.5	0	0	1	0.410542	1.12971	466000	0.011778	0		1.00002	1.02636	0.000261545	0.000185207	0.000260491	00:00:00	249815	2023-08-15			3.36807e+08	2023-08-15	1.37422e+07	0.8
2023-08-16	1.37756e+07	0			0.4	0	0	2.06634e+08	0	2.5		0	2023-08-16	0.613498		1	0	0	0.5	0	0	1	0.410552	1.12971	466300	0.011778	0		1.00002	1.02638	0.000261545	0.000185207	0.000260491	00:00:00	249815	2023-08-16			3.36812e+08	2023-08-16	1.37422e+07	0.8
2023-08-17	1.37756e+07	0			0.4	0	0	2.06634e+08	0	2.5		0	2023-08-17	0.613488		1	0	0	0.5	0	0	1	0.410561	1.12971	466600	0.011778	0		1.00002	1.0264	0.000261545	0.000185207	0.000260491	00:00:00	249815	2023-08-17			3.36818e+08	2023-08-17	1.37423e+07	0.8
2023-08-18	1.37756e+07	0			0.4	0	0	2.06634e+08	0	2.5		0	2023-08-18	0.613478		1	0	0	0.5	0	0	1	0.41057	1.12971	466900	0.011778	0		1.00002	1.02643	0.000261545	0.000185207	0.000260491	00:00:00	249815	2023-08-18			3.36823e+08	2023-08-18	1.37423e+07	0.8
2023-08-19	1.37756e+07	0			0.4	0	0	2.06634e+08	0	2.5		0	2023-08-19	0.613468		1	0	0	0.5	0	0	1	0.41058	1.12971	467200	0.011778	0		1.00002	1.02645	0.000261545	0.000185207	0.000260491	00:00:00	249815	2023-08-19			3.36829e+08	2023-08-19	1.37423e+07	0.8
2023-08-20	1.37756e+07	0			0.4	0	0	2.06634e+08	0	2.5		0	2023-08-20	0.613458		1	0	0	0.5	0	0	1	0.410589	1.12971	467500	0.011778	0		1.00002	1.02647	0.000261545	0.000185207	0.000260491	00:00:00	249815	2023-08-20			3.36834e+08	2023-08-20	1.37423e+07	0.8
2023-08-21	1.37756e+07	0			0.4	0	0	2.06634e+08	0	2.5		0	2023-08-21	0.613448		1	0	0	0.5	0	0	1	0.410598	1.12971	467800	0.011778	0		1.00002	1.0265	0.000261545	0.000185207	0.000260491	00:00:00	249815	2023-08-21			3.3684e+08	2023-08-21	1.37423e+07	0.8
2023-08-22	1.37756e+07	0			0.4	0	0	2.06634e+08	0	2.5		0	2023-08-22	0.613438		1	0	0	0.5	0	0	1	0.410608	1.12971	468100	0.011778	0		1.00002	1.02652	0.000261545	0.000185207	0.000260491	00:00:00	249815	2023-08-22			3.36845e+08	2023-08-22	1.37424e+07	0.8
2023-08-23	1.37756e+07	0			0.4	0	0	2.06634e+08	0	2.5		0	2023-08-23	0.613428		1	0	0	0.5	0	0	1	0.410617	1.12971	468400	0.011778	0		1.00002	1.02654	0.000261545	0.000185207	0.000260491	00:00:00	249815	2023-08-23			3.36851e+08	2023-08-23	1.37424e+07	0.8
2023-08-24	1.37756e+07	0			0.4	0	0	2.06634e+08	0	2.5		0	2023-08-24	0.613418		1	0	0	0.5	0	0	1	0.410626	1.12971	468700	0.011778	0		1.00002	1.02657	0.000261545	0.000185207	0.000260491	00:00:00	249815	2023-08-24			3.36856e+08	2023-08-24	1.37424e+07	0.8
2023-08-25	1.37756e+07	0			0.4	0	0	2.06634e+08	0	2.5		0	2023-08-25	0.613407		1	0	0	0.5	0	0	1	0.410636	1.12971	469000	0.011778	0		1.00002	1.02659	0.000261545	0.000185207	0.000260491	00:00:00	249815	2023-08-25			3.36862e+08	2023-08-25	1.37424e+07	0.8
2023-08-26	1.37756e+07	0			0.4	0	0	2.06634e+08	0	2.5		0	2023-08-26	0.613397		1	0	0	0.5	0	0	1	0.410645	1.12971	469300	0.011778	0		1.00002	1.02661	0.000261545	0.000185207	0.000260491	00:00:00	249815	2023-08-26			3.36868e+08	2023-08-26	1.37424e+07	0.8
2023-08-27	1.37756e+07	0			0.4	0	0	2.06634e+08	0	2.5		0	2023-08-27	0.613387		1	0	0	0.5	0	0	1	0.410654	1.12971	469600	0.011778	0		1.00002	1.02664	0.000261545	0.000185207	0.000260491	00:00:00	249815	2023-08-27			3.36873e+08	2023-08-27	1.37424e+07	0.8
2023-08-28	1.37756e+07	0			0.4	0	0	2.06634e+08	0	2.5		0	2023-08-28	0.613377		1	0	0	0.5	0	0	1	0.410664	1.12971	469900	0.011778	0		1.00002	1.02666	0.000261545	0.000185207	0.000260491	00:00:00	249815	2023-08-28			3.36879e+08	2023-08-28	1.37424e+07	0.8
2023-08-29	1.37756e+07	0			0.4	0	0	2.06634e+08	0	2.5		0	2023-08-29	0.613367		1	0	0	0.5	0	0	1	0.410673	1.12971	470200	0.011778	0		1.00002	1.02668	0.000261545	0.000185207	0.000260491	00:00:00	249815	2023-08-29			3.36884e+08	2023-08-29	1.37424e+07	0.8
2023-08-30	1.37756e+07	0			0.4	0	0	2.06634e+08	0	2.5		0	2023-08-30	0.613357		1	0	0	0.5	0	0	1	0.410682	1.12971	470500	0.011778	0		1.00002	1.02671	0.000261545	0.000185207	0.000260491	00:00:00	249815	2023-08-30			3.3689e+08	2023-08-30	1.37424e+07	0.8
2023-08-31	1.37756e+07	0			0.4	0	0	2.06634e+08	0	2.5		0	2023-08-31	0.613347		1	0	0	0.5	0	0	1	0.410692	1.12971	470800	0.011778	0		1.00002	1.02673	0.000261545	0.000185207	0.000260491	00:00:00	249815	2023-08-31			3.36895e+08	2023-08-31	1.37425e+07	0.8
2023-09-01	1.37756e+07	0			0.4	0	0	2.06634e+08	0	2.5		0	2023-09-01	0.613337		1	0	0	0.555556	0	0	1	0.410701	1.12971	471100	0.011778	0		1.00002	1.02675	0.000261545	0.000185207	0.000260491	00:00:00	249815	2023-09-01			3.36901e+08	2023-09-01	1.37425e+07	0.9
2023-09-02	1.37756e+07	0			0.4	0	0	2.06634e+08	0	2.5		0	2023-09-02	0.613327		1	0	0	0.555556	0	0	1	0.41071	1.12971	471400	0.011778	0		1.00002	1.02678	0.000261545	0.000185207	0.000260491	00:00:00	249815	2023-09-02			3.36906e+08	2023-09-02	1.37425e+07	0.9
2023-09-03	1.37756e+07	0			0.4	0	0	2.06634e+08	0	2.5		0	2023-09-03	0.613317		1	0	0	0.555556	0	0	1	0.41072	1.12971	471700	0.011778	0		1.00002	1.0268	0.000261545	0.000185207	0.000260491	00:00:00	249815	2023-09-03			3.36912e+08	2023-09-03	1.37425e+07	0.9
2023-09-04	1.37756e+07	0			0.4	0	0	2.06634e+08	0	2.5		0	2023-09-04	0.613307		1	0	0	0.555556	0	0	1	0.410729	1.12971	472000	0.011778	0		1.00002	1.02682	0.000261545	0.000185207	0.000260491	00:00:00	249815	2023-09-04			3.36917e+08	2023-09-04	1.37425e+07	0.9
2023-09-05	1.37756e+07	0			0.4	0	0	2.06634e+08	0	2.5		0	2023-09-05	0.613297		1	0	0	0.555556	0	0	1	0.410738	1.12971	472300	0.011778	0		1.00002	1.02685	0.000261545	0.000185207	0.000260491	00:00:00	249815	2023-09-05			3.36923e+08	2023-09-05	1.37425e+07	0.9
2023-09-06	1.37756e+07	0			0.4	0	0	2.06634e+08	0	2.5		0	2023-09-06	0.613287		1	0	0	0.555556	0	0	1	0.410748	1.12971	472600	0.011778	0		1.00002	1.02687	0.000261545	0.000185207	0.000260491	00:00:00	249815	2023-09-06			3.36928e+08	2023-09-06	1.37425e+07	0.9
2023-09-07	1.37756e+07	0			0.4	0	0	2.06634e+08	0	2.5		0	2023-09-07	0.613276		1	0	0	0.555556	0	0	1	0.410757	1.12971	472900	0.011778	0		1.00002	1.02689	0.000261545	0.000185207	0.000260491	00:00:00	249815	2023-09-07			3.36934e+08	2023-09-07	1.37425e+07	0.9
2023-09-08	1.37756e+07	0			0.4	0	0	2.06634e+08	0	2.5		0	2023-09-08	0.613266		1	0	0	0.555556	0	0	1	0.410766	1.12971	473200	0.011778	0		1.00002	1.02692	0.000261545	0.000185207	0.000260491	00:00:00	249815	2023-09-08			3.3694e+08	2023-09-08	1.37425e+07	0.9
2023-09-09	1.37756e+07	0			0.4	0	0	2.06634e+08	0	2.5		0	2023-09-09	0.613256		1	0	0	0.555556	0	0	1	0.410776	1.12971	473500	0.011778	0		1.00002	1.02694	0.000261545	0.000185207	0.000260491	00:00:00	249815	2023-09-09			3.36945e+08	2023-09-09	1.37425e+07	0.9
2023-09-10	1.37756e+07	0			0.4	0	0	2.06634e+08	0	2.5		0	2023-09-10	0.613246		1	0	0	0.555556	0	0	1	0.410785	1.12971	473800	0.011778	0		1.00002	1.02696	0.000261545	0.000185207	0.000260491	00:00:00	249815	2023-09-10			3.36951e+08	2023-09-10	1.37425e+07	0.9
2023-09-11	1.37756e+07	0			0.4	0	0	2.06634e+08	0	2.5		0	2023-09-11	0.613236		1	0	0	0.555556	0	0	1	0.410794	1.12971	474100	0.011778	0		1.00002	1.02699	0.000261545	0.000185207	0.000260491	00:00:00	249815	2023-09-11			3.36956e+08	2023-09-11	1.37425e+07	0.9
2023-09-12	1.37756e+07	0			0.4	0	0	2.06634e+08	0	2.5		0	2023-09-12	0.613226		1	0	0	0.555556	0	0	1	0.410804	1.12971	474400	0.011778	0		1.00002	1.02701	0.000261545	0.000185207	0.000260491	00:00:00	249815	2023-09-12			3.36962e+08	2023-09-12	1.37425e+07	0.9
2023-09-13	1.37756e+07	0			0.4	0	0	2.06634e+08	0	2.5		0	2023-09-13	0.613216		1	0	0	0.555556	0	0	1	0.410813	1.12971	474700	0.011778	0		1.00002	1.02703	0.000261545	0.000185207	0.000260491	00:00:00	249815	2023-09-13			3.36967e+08	2023-09-13	1.37425e+07	0.9
2023-09-14	1.37756e+07	0			0.4	0	0	2.06634e+08	0	2.5		0	2023-09-14	0.613206		1	0	0	0.555556	0	0	1	0.410822	1.12971	475000	0.011778	0		1.00002	1.02706	0.000261545	0.000185207	0.000260491	00:00:00	249815	2023-09-14			3.36973e+08	2023-09-14	1.37425e+07	0.9
2023-09-15	1.37756e+07	0			0.4	0	0	2.06634e+08	0	2.5		0	2023-09-15	0.613196		1	0	0	0.555556	0	0	1	0.410832	1.12971	475300	0.011778	0		1.00002	1.02708	0.000261545	0.000185207	0.000260491	00:00:00	249815	2023-09-15			3.36978e+08	2023-09-15	1.37425e+07	0.9
2023-09-16	1.37756e+07	0			0.4	0	0	2.06634e+08	0	2.5		0	2023-09-16	0.613186		1	0	0	0.555556	0	0	1	0.410841	1.12971	475600	0.011778	0		1.00002	1.0271	0.000261545	0.000185207	0.000260491	00:00:00	249815	2023-09-16			3.36984e+08	2023-09-16	1.37426e+07	0.9
2023-09-17	1.37756e+07	0			0.4	0	0	2.06634e+08	0	2.5		0	2023-09-17	0.613176		1	0	0	0.555556	0	0	1	0.41085	1.12971	475900	0.011778	0		1.00002	1.02713	0.000261545	0.000185207	0.000260491	00:00:00	249815	2023-09-17			3.36989e+08	2023-09-17	1.37426e+07	0.9
2023-09-18	1.37756e+07	0			0.4	0	0	2.06634e+08	0	2.5		0	2023-09-18	0.613166		1	0	0	0.555556	0	0	1	0.410859	1.12971	476200	0.011778	0		1.00002	1.02715	0.000261545	0.000185207	0.000260491	00:00:00	249815	2023-09-18			3.36995e+08	2023-09-18	1.37426e+07	0.9
2023-09-19	1.37756e+07	0			0.4	0	0	2.06634e+08	0	2.5		0	2023-09-19	0.613155		1	0	0	0.555556	0	0	1	0.410869	1.12971	476500	0.011778	0		1.00002	1.02717	0.000261545	0.000185207	0.000260491	00:00:00	249815	2023-09-19			3.37e+08	2023-09-19	1.37426e+07	0.9
2023-09-20	1.37756e+07	0			0.4	0	0	2.06634e+08	0	2.5		0	2023-09-20	0.613145		1	0	0	0.555556	0	0	1	0.410878	1.12971	476800	0.011778	0		1.00002	1.0272	0.000261545	0.000185207	0.000260491	00:00:00	249815	2023-09-20			3.37006e+08	2023-09-20	1.37426e+07	0.9
2023-09-21	1.37756e+07	0			0.4	0	0	2.06634e+08	0	2.5		0	2023-09-21	0.613135		1	0	0	0.555556	0	0	1	0.410887	1.12971	477100	0.011778	0		1.00002	1.02722	0.000261545	0.000185207	0.000260491	00:00:00	249815	2023-09-21			3.37012e+08	2023-09-21	1.37426e+07	0.9
2023-09-22	1.37756e+07	0			0.4	0	0	2.06634e+08	0	2.5		0	2023-09-22	0.613125		1	0	0	0.555556	0	0	1	0.410897	1.12971	477400	0.011778	0		1.00002	1.02724	0.000261545	0.000185207	0.000260491	00:00:00	249815	2023-09-22			3.37017e+08	2023-09-22	1.37426e+07	0.9
2023-09-23	1.37756e+07	0			0.4	0	0	2.06634e+08	0	2.5		0	2023-09-23	0.613115		1	0	0	0.555556	0	0	1	0.410906	1.12971	477700	0.011778	0		1.00002	1.02727	0.000261545	0.000185207	0.000260491	00:00:00	249815	2023-09-23			3.37023e+08	2023-09-23	1.37426e+07	0.9
2023-09-24	1.37756e+07	0			0.4	0	0	2.06634e+08	0	2.5		0	2023-09-24	0.613105		1	0	0	0.555556	0	0	1	0.410915	1.12971	478000	0.011778	0		1.00002	1.02729	0.000261545	0.000185207	0.000260491	00:00:00	249815	2023-09-24			3.37028e+08	2023-09-24	1.37426e+07	0.9
2023-09-25	1.37756e+07	0			0.4	0	0	2.06634e+08	0	2.5		0	2023-09-25	0.613095		1	0	0	0.555556	0	0	1	0.410925	1.12971	478300	0.011778	0		1.00002	1.02731	0.000261545	0.000185207	0.000260491	00:00:00	249815	2023-09-25			3.37034e+08	2023-09-25	1.37426e+07	0.9
2023-09-26	1.37756e+07	0			0.4	0	0	2.06634e+08	0	2.5		0	2023-09-26	0.613085		1	0	0	0.555556	0	0	1	0.410934	1.12971	478600	0.011778	0		1.00002	1.02733	0.000261545	0.000185207	0.000260491	00:00:00	249815	2023-09-26			3.37039e+08	2023-09-26	1.37426e+07	0.9
2023-09-27	1.37756e+07	0			0.4	0	0	2.06634e+08	0	2.5		0	2023-09-27	0.613075		1	0	0	0.555556	0	0	1	0.410943	1.12971	478900	0.011778	0		1.00002	1.02736	0.000261545	0.000185207	0.000260491	00:00:00	249815	2023-09-27			3.37045e+08	2023-09-27	1.37426e+07	0.9
2023-09-28	1.37756e+07	0			0.4	0	0	2.06634e+08	0	2.5		0	2023-09-28	0.613065		1	0	0	0.555556	0	0	1	0.410953	1.12971	479200	0.011778	0		1.00002	1.02738	0.000261545	0.000185207	0.000260491	00:00:00	249815	2023-09-28			3.3705e+08	2023-09-28	1.37426e+07	0.9
2023-09-29	1.37756e+07	0			0.4	0	0	2.06634e+08	0	2.5		0	2023-09-29	0.613055		1	0	0	0.555556	0	0	1	0.410962	1.12971	479500	0.011778	0		1.00002	1.0274	0.000261545	0.000185207	0.000260491	00:00:00	249815	2023-09-29			3.37056e+08	2023-09-29	1.37426e+07	0.9
2023-09-30	1.37756e+07	0			0.4	0	0	2.06634e+08	0	2.5		0	2023-09-30	0.613045		1	0	0	0.555556	0	0	1	0.410971	1.12971	479800	0.011778	0		1.00002	1.02743	0.000261545	0.000185207	0.000260491	00:00:00	249815	2023-09-30			3.37061e+08	2023-09-30	1.37426e+07	0.9
2023-10-01	1.37756e+07	0			0.4	0	0	2.06634e+08	0	2.5		0	2023-10-01	0.613035		1	0	0	0.6	0	0	1	0.41098	1.12971	480100	0.011778	0		1.00002	1.02745	0.000261545	0.000185207	0.000260491	00:00:00	249815	2023-10-01			3.37067e+08	2023-10-01	1.37426e+07	1
2023-10-02	1.37756e+07	0			0.4	0	0	2.06634e+08	0	2.5		0	2023-10-02	0.613024		1	0	0	0.6	0	0	1	0.41099	1.12971	480400	0.011778	0		1.00002	1.02747	0.000261545	0.000185207	0.000260491	00:00:00	249815	2023-10-02			3.37072e+08	2023-10-02	1.37426e+07	1
2023-10-03	1.37756e+07	0			0.4	0	0	2.06634e+08	0	2.5		0	2023-10-03	0.613014		1	0	0	0.6	0	0	1	0.410999	1.12971	480700	0.011778	0		1.00002	1.0275	0.000261545	0.000185207	0.000260491	00:00:00	249815	2023-10-03			3.37078e+08	2023-10-03	1.37426e+07	1
2023-10-04	1.37756e+07	0			0.4	0	0	2.06634e+08	0	2.5		0	2023-10-04	0.613004		1	0	0	0.6	0	0	1	0.411008	1.12971	481000	0.011778	0		1.00002	1.02752	0.000261545	0.000185207	0.000260491	00:00:00	249815	2023-10-04			3.37084e+08	2023-10-04	1.37426e+07	1
2023-10-05	1.37756e+07	0			0.4	0	0	2.06634e+08	0	2.5		0	2023-10-05	0.612994		1	0	0	0.6	0	0	1	0.411018	1.12971	481300	0.011778	0		1.00002	1.02754	0.000261545	0.000185207	0.000260491	00:00:00	249815	2023-10-05			3.37089e+08	2023-10-05	1.37426e+07	1
2023-10-06	1.37756e+07	0			0.4	0	0	2.06634e+08	0	2.5		0	2023-10-06	0.612984		1	0	0	0.6	0	0	1	0.411027	1.12971	481600	0.011778	0		1.00002	1.02757	0.000261545	0.000185207	0.000260491	00:00:00	249815	2023-10-06			3.37095e+08	2023-10-06	1.37426e+07	1
2023-10-07	1.37756e+07	0			0.4	0	0	2.06634e+08	0	2.5		0	2023-10-07	0.612974		1	0	0	0.6	0	0	1	0.411036	1.12971	481900	0.011778	0		1.00002	1.02759	0.000261545	0.000185207	0.000260491	00:00:00	249815	2023-10-07			3.371e+08	2023-10-07	1.37426e+07	1
2023-10-08	1.37756e+07	0			0.4	0	0	2.06634e+08	0	2.5		0	2023-10-08	0.612964		1	0	0	0.6	0	0	1	0.411046	1.12971	482200	0.011778	0		1.00002	1.02761	0.000261545	0.000185207	0.000260491	00:00:00	249815	2023-10-08			3.37106e+08	2023-10-08	1.37426e+07	1
2023-10-09	1.37756e+07	0			0.4	0	0	2.06634e+08	0	2.5		0	2023-10-09	0.612954		1	0	0	0.6	0	0	1	0.411055	1.12971	482500	0.011778	0		1.00002	1.02764	0.000261545	0.000185207	0.000260491	00:00:00	249815	2023-10-09			3.37111e+08	2023-10-09	1.37426e+07	1
2023-10-10	1.37756e+07	0			0.4	0	0	2.06634e+08	0	2.5		0	2023-10-10	0.612944		1	0	0	0.6	0	0	1	0.411064	1.12971	482800	0.011778	0		1.00002	1.02766	0.000261545	0.000185207	0.000260491	00:00:00	249815	2023-10-10			3.37117e+08	2023-10-10	1.37426e+07	1
2023-10-11	1.37756e+07	0			0.4	0	0	2.06634e+08	0	2.5		0	2023-10-11	0.612934		1	0	0	0.6	0	0	1	0.411074	1.12971	483100	0.011778	0		1.00002	1.02768	0.000261545	0.000185207	0.000260491	00:00:00	249815	2023-10-11			3.37122e+08	2023-10-11	1.37426e+07	1
2023-10-12	1.37756e+07	0			0.4	0	0	2.06634e+08	0	2.5		0	2023-10-12	0.612924		1	0	0	0.6	0	0	1	0.411083	1.12971	483400	0.011778	0		1.00002	1.02771	0.000261545	0.000185207	0.000260491	00:00:00	249815	2023-10-12			3.37128e+08	2023-10-12	1.37426e+07	1
2023-10-13	1.37756e+07	0			0.4	0	0	2.06634e+08	0	2.5		0	2023-10-13	0.612914		1	0	0	0.6	0	0	1	0.411092	1.12971	483700	0.011778	0		1.00002	1.02773	0.000261545	0.000185207	0.000260491	00:00:00	249815	2023-10-13			3.37133e+08	2023-10-13	1.37426e+07	1
2023-10-14	1.37756e+07	0			0.4	0	0	2.06634e+08	0	2.5		0	2023-10-14	0.612904		1	0	0	0.6	0	0	1	0.411101	1.12971	484000	0.011778	0		1.00002	1.02775	0.000261545	0.000185207	0.000260491	00:00:00	249815	2023-10-14			3.37139e+08	2023-10-14	1.37426e+07	1
2023-10-15	1.37756e+07	0			0.4	0	0	2.06634e+08	0	2.5		0	2023-10-15	0.612893		1	0	0	0.6	0	0	1	0.411111	1.12971	484300	0.011778	0		1.00002	1.02778	0.000261545	0.000185207	0.000260491	00:00:00	249815	2023-10-15			3.37145e+08	2023-10-15	1.37426e+07	1
2023-10-16	1.37756e+07	0			0.4	0	0	2.06634e+08	0	2.5		0	2023-10-16	0.612883		1	0	0	0.6	0	0	1	0.41112	1.12971	484600	0.011778	0		1.00002	1.0278	0.000261545	0.000185207	0.000260491	00:00:00	249815	2023-10-16			3.3715e+08	2023-10-16	1.37426e+07	1
2023-10-17	1.37756e+07	0			0.4	0	0	2.06634e+08	0	2.5		0	2023-10-17	0.612873		1	0	0	0.6	0	0	1	0.411129	1.12971	484900	0.011778	0		1.00002	1.02782	0.000261545	0.000185207	0.000260491	00:00:00	249815	2023-10-17			3.37156e+08	2023-10-17	1.37426e+07	1
2023-10-18	1.37756e+07	0			0.4	0	0	2.06634e+08	0	2.5		0	2023-10-18	0.612863		1	0	0	0.6	0	0	1	0.411139	1.12971	485200	0.011778	0		1.00002	1.02785	0.000261545	0.000185207	0.000260491	00:00:00	249815	2023-10-18			3.37161e+08	2023-10-18	1.37426e+07	1
2023-10-19	1.37756e+07	0			0.4	0	0	2.06634e+08	0	2.5		0	2023-10-19	0.612853		1	0	0	0.6	0	0	1	0.411148	1.12971	485500	0.011778	0		1.00002	1.02787	0.000261545	0.000185207	0.000260491	00:00:00	249815	2023-10-19			3.37167e+08	2023-10-19	1.37426e+07	1
2023-10-20	1.37756e+07	0			0.4	0	0	2.06634e+08	0	2.5		0	2023-10-20	0.612843		1	0	0	0.6	0	0	1	0.411157	1.12971	485800	0.011778	0		1.00002	1.02789	0.000261545	0.000185207	0.000260491	00:00:00	249815	2023-10-20			3.37172e+08	2023-10-20	1.37426e+07	1
2023-10-21	1.37756e+07	0			0.4	0	0	2.06634e+08	0	2.5		0	2023-10-21	0.612833		1	0	0	0.6	0	0	1	0.411167	1.12971	486100	0.011778	0		1.00002	1.02792	0.000261545	0.000185207	0.000260491	00:00:00	249815	2023-10-21			3.37178e+08	2023-10-21	1.37426e+07	1
2023-10-22	1.37756e+07	0			0.4	0	0	2.06634e+08	0	2.5		0	2023-10-22	0.612823		1	0	0	0.6	0	0	1	0.411176	1.12971	486400	0.011778	0		1.00002	1.02794	0.000261545	0.000185207	0.000260491	00:00:00	249815	2023-10-22			3.37183e+08	2023-10-22	1.37426e+07	1
2023-10-23	1.37756e+07	0			0.4	0	0	2.06634e+08	0	2.5		0	2023-10-23	0.612813		1	0	0	0.6	0	0	1	0.411185	1.12971	486700	0.011778	0		1.00002	1.02796	0.000261545	0.000185207	0.000260491	00:00:00	249815	2023-10-23			3.37189e+08	2023-10-23	1.37426e+07	1
2023-10-24	1.37756e+07	0			0.4	0	0	2.06634e+08	0	2.5		0	2023-10-24	0.612803		1	0	0	0.6	0	0	1	0.411194	1.12971	487000	0.011778	0		1.00002	1.02799	0.000261545	0.000185207	0.000260491	00:00:00	249815	2023-10-24			3.37194e+08	2023-10-24	1.37426e+07	1
2023-10-25	1.37756e+07	0			0.4	0	0	2.06634e+08	0	2.5		0	2023-10-25	0.612793		1	0	0	0.6	0	0	1	0.411204	1.12971	487300	0.011778	0		1.00002	1.02801	0.000261545	0.000185207	0.000260491	00:00:00	249815	2023-10-25			3.372e+08	2023-10-25	1.37426e+07	1
2023-10-26	1.37756e+07	0			0.4	0	0	2.06634e+08	0	2.5		0	2023-10-26	0.612783		1	0	0	0.6	0	0	1	0.411213	1.12971	487600	0.011778	0		1.00002	1.02803	0.000261545	0.000185207	0.000260491	00:00:00	249815	2023-10-26			3.37205e+08	2023-10-26	1.37426e+07	1
2023-10-27	1.37756e+07	0			0.4	0	0	2.06634e+08	0	2.5		0	2023-10-27	0.612773		1	0	0	0.6	0	0	1	0.411222	1.12971	487900	0.011778	0		1.00002	1.02806	0.000261545	0.000185207	0.000260491	00:00:00	249815	2023-10-27			3.37211e+08	2023-10-27	1.37427e+07	1
2023-10-28	1.37756e+07	0			0.4	0	0	2.06634e+08	0	2.5		0	2023-10-28	0.612762		1	0	0	0.6	0	0	1	0.411232	1.12971	488200	0.011778	0		1.00002	1.02808	0.000261545	0.000185207	0.000260491	00:00:00	249815	2023-10-28			3.37217e+08	2023-10-28	1.37427e+07	1
2023-10-29	1.37756e+07	0			0.4	0	0	2.06634e+08	0	2.5		0	2023-10-29	0.612752		1	0	0	0.6	0	0	1	0.411241	1.12971	488500	0.011778	0		1.00002	1.0281	0.000261545	0.000185207	0.000260491	00:00:00	249815	2023-10-29			3.37222e+08	2023-10-29	1.37427e+07	1
2023-10-30	1.37756e+07	0			0.4	0	0	2.06634e+08	0	2.5		0	2023-10-30	0.612742		1	0	0	0.6	0	0	1	0.41125	1.12971	488800	0.011778	0		1.00002	1.02813	0.000261545	0.000185207	0.000260491	00:00:00	249815	2023-10-30			3.37228e+08	2023-10-30	1.37427e+07	1
2023-10-31	1.37756e+07	0			0.4	0	0	2.06634e+08	0	2.5		0	2023-10-31	0.612732		1	0	0	0.6	0	0	1	0.41126	1.12971	489100	0.011778	0		1.00002	1.02815	0.000261545	0.000185207	0.000260491	00:00:00	249815	2023-10-31			3.37233e+08	2023-10-31	1.37427e+07	1
2023-11-01	1.37756e+07	0			0.4	0	0	2.06634e+08	0	2.5		0	2023-11-01	0.612722		1	0	0	0.6	0	0	1	0.411269	1.12971	489400	0.011778	0		1.00002	1.02817	0.000261545	0.000185207	0.000260491	00:00:00	249815	2023-11-01			3.37239e+08	2023-11-01	1.37427e+07	1
2023-11-02	1.37756e+07	0			0.4	0	0	2.06634e+08	0	2.5		0	2023-11-02	0.612712		1	0	0	0.6	0	0	1	0.411278	1.12971	489700	0.011778	0		1.00002	1.0282	0.000261545	0.000185207	0.000260491	00:00:00	249815	2023-11-02			3.37244e+08	2023-11-02	1.37427e+07	1
2023-11-03	1.37756e+07	0			0.4	0	0	2.06634e+08	0	2.5		0	2023-11-03	0.612702		1	0	0	0.6	0	0	1	0.411288	1.12971	490000	0.011778	0		1.00002	1.02822	0.000261545	0.000185207	0.000260491	00:00:00	249815	2023-11-03			3.3725e+08	2023-11-03	1.37427e+07	1
2023-11-04	1.37756e+07	0			0.4	0	0	2.06634e+08	0	2.5		0	2023-11-04	0.612692		1	0	0	0.6	0	0	1	0.411297	1.12971	490300	0.011778	0		1.00002	1.02824	0.000261545	0.000185207	0.000260491	00:00:00	249815	2023-11-04			3.37255e+08	2023-11-04	1.37427e+07	1
2023-11-05	1.37756e+07	0			0.4	0	0	2.06634e+08	0	2.5		0	2023-11-05	0.612682		1	0	0	0.6	0	0	1	0.411306	1.12971	490600	0.011778	0		1.00002	1.02827	0.000261545	0.000185207	0.000260491	00:00:00	249815	2023-11-05			3.37261e+08	2023-11-05	1.37427e+07	1
2023-11-06	1.37756e+07	0			0.4	0	0	2.06634e+08	0	2.5		0	2023-11-06	0.612672		1	0	0	0.6	0	0	1	0.411315	1.12971	490900	0.011778	0		1.00002	1.02829	0.000261545	0.000185207	0.000260491	00:00:00	249815	2023-11-06			3.37266e+08	2023-11-06	1.37427e+07	1
2023-11-07	1.37756e+07	0			0.4	0	0	2.06634e+08	0	2.5		0	2023-11-07	0.612662		1	0	0	0.6	0	0	1	0.411325	1.12971	491200	0.011778	0		1.00002	1.02831	0.000261545	0.000185207	0.000260491	00:00:00	249815	2023-11-07			3.37272e+08	2023-11-07	1.37427e+07	1
2023-11-08	1.37756e+07	0			0.4	0	0	2.06634e+08	0	2.5		0	2023-11-08	0.612652		1	0	0	0.6	0	0	1	0.411334	1.12971	491500	0.011778	0		1.00002	1.02834	0.000261545	0.000185207	0.000260491	00:00:00	249815	2023-11-08			3.37278e+08	2023-11-08	1.37427e+07	1
2023-11-09	1.37756e+07	0			0.4	0	0	2.06634e+08	0	2.5		0	2023-11-09	0.612642		1	0	0	0.6	0	0	1	0.411343	1.12971	491800	0.011778	0		1.00002	1.02836	0.000261545	0.000185207	0.000260491	00:00:00	249815	2023-11-09			3.37283e+08	2023-11-09	1.37427e+07	1
2023-11-10	1.37756e+07	0			0.4	0	0	2.06634e+08	0	2.5		0	2023-11-10	0.612632		1	0	0	0.6	0	0	1	0.411353	1.12971	492100	0.011778	0		1.00002	1.02838	0.000261545	0.000185207	0.000260491	00:00:00	249815	2023-11-10			3.37289e+08	2023-11-10	1.37427e+07	1
2023-11-11	1.37756e+07	0			0.4	0	0	2.06634e+08	0	2.5		0	2023-11-11	0.612621		1	0	0	0.6	0	0	1	0.411362	1.12971	492400	0.011778	0		1.00002	1.0284	0.000261545	0.000185207	0.000260491	00:00:00	249815	2023-11-11			3.37294e+08	2023-11-11	1.37427e+07	1
2023-11-12	1.37756e+07	0			0.4	0	0	2.06634e+08	0	2.5		0	2023-11-12	0.612611		1	0	0	0.6	0	0	1	0.411371	1.12971	492700	0.011778	0		1.00002	1.02843	0.000261545	0.000185207	0.000260491	00:00:00	249815	2023-11-12			3.373e+08	2023-11-12	1.37427e+07	1
2023-11-13	1.37756e+07	0			0.4	0	0	2.06634e+08	0	2.5		0	2023-11-13	0.612601		1	0	0	0.6	0	0	1	0.411381	1.12971	493000	0.011778	0		1.00002	1.02845	0.000261545	0.000185207	0.000260491	00:00:00	249815	2023-11-13			3.37305e+08	2023-11-13	1.37427e+07	1
2023-11-14	1.37756e+07	0			0.4	0	0	2.06634e+08	0	2.5		0	2023-11-14	0.612591		1	0	0	0.6	0	0	1	0.41139	1.12971	493300	0.011778	0		1.00002	1.02847	0.000261545	0.000185207	0.000260491	00:00:00	249815	2023-11-14			3.37311e+08	2023-11-14	1.37427e+07	1
2023-11-15	1.37756e+07	0			0.4	0	0	2.06634e+08	0	2.5		0	2023-11-15	0.612581		1	0	0	0.6	0	0	1	0.411399	1.12971	493600	0.011778	0		1.00002	1.0285	0.000261545	0.000185207	0.000260491	00:00:00	249815	2023-11-15			3.37316e+08	2023-11-15	1.37427e+07	1
2023-11-16	1.37756e+07	0			0.4	0	0	2.06634e+08	0	2.5		0	2023-11-16	0.612571		1	0	0	0.6	0	0	1	0.411408	1.12971	493900	0.011778	0		1.00002	1.02852	0.000261545	0.000185207	0.000260491	00:00:00	249815	2023-11-16			3.37322e+08	2023-11-16	1.37427e+07	1
2023-11-17	1.37756e+07	0			0.4	0	0	2.06634e+08	0	2.5		0	2023-11-17	0.612561		1	0	0	0.6	0	0	1	0.411418	1.12971	494200	0.011778	0		1.00002	1.02854	0.000261545	0.000185207	0.000260491	00:00:00	249815	2023-11-17			3.37327e+08	2023-11-17	1.37427e+07	1
2023-11-18	1.37756e+07	0			0.4	0	0	2.06634e+08	0	2.5		0	2023-11-18	0.612551		1	0	0	0.6	0	0	1	0.411427	1.12971	494500	0.011778	0		1.00002	1.02857	0.000261545	0.000185207	0.000260491	00:00:00	249815	2023-11-18			3.37333e+08	2023-11-18	1.37427e+07	1
2023-11-19	1.37756e+07	0			0.4	0	0	2.06634e+08	0	2.5		0	2023-11-19	0.612541		1	0	0	0.6	0	0	1	0.411436	1.12971	494800	0.011778	0		1.00002	1.02859	0.000261545	0.000185207	0.000260491	00:00:00	249815	2023-11-19			3.37339e+08	2023-11-19	1.37427e+07	1
2023-11-20	1.37756e+07	0			0.4	0	0	2.06634e+08	0	2.5		0	2023-11-20	0.612531		1	0	0	0.6	0	0	1	0.411446	1.12971	495100	0.011778	0		1.00002	1.02861	0.000261545	0.000185207	0.000260491	00:00:00	249815	2023-11-20			3.37344e+08	2023-11-20	1.37427e+07	1
2023-11-21	1.37756e+07	0			0.4	0	0	2.06634e+08	0	2.5		0	2023-11-21	0.612521		1	0	0	0.6	0	0	1	0.411455	1.12971	495400	0.011778	0		1.00002	1.02864	0.000261545	0.000185207	0.000260491	00:00:00	249815	2023-11-21			3.3735e+08	2023-11-21	1.37427e+07	1
2023-11-22	1.37756e+07	0			0.4	0	0	2.06634e+08	0	2.5		0	2023-11-22	0.612511		1	0	0	0.6	0	0	1	0.411464	1.12971	495700	0.011778	0		1.00002	1.02866	0.000261545	0.000185207	0.000260491	00:00:00	249815	2023-11-22			3.37355e+08	2023-11-22	1.37427e+07	1
2023-11-23	1.37756e+07	0			0.4	0	0	2.06634e+08	0	2.5		0	2023-11-23	0.612501		1	0	0	0.6	0	0	1	0.411473	1.12971	496000	0.011778	0		1.00002	1.02868	0.000261545	0.000185207	0.000260491	00:00:00	249815	2023-11-23			3.37361e+08	2023-11-23	1.37427e+07	1
2023-11-24	1.37756e+07	0			0.4	0	0	2.06634e+08	0	2.5		0	2023-11-24	0.612491		1	0	0	0.6	0	0	1	0.411483	1.12971	496300	0.011778	0		1.00002	1.02871	0.000261545	0.000185207	0.000260491	00:00:00	249815	2023-11-24			3.37366e+08	2023-11-24	1.37427e+07	1
2023-11-25	1.37756e+07	0			0.4	0	0	2.06634e+08	0	2.5		0	2023-11-25	0.612481		1	0	0	0.6	0	0	1	0.411492	1.12971	496600	0.011778	0		1.00002	1.02873	0.000261545	0.000185207	0.000260491	00:00:00	249815	2023-11-25			3.37372e+08	2023-11-25	1.37427e+07	1
2023-11-26	1.37756e+07	0			0.4	0	0	2.06634e+08	0	2.5		0	2023-11-26	0.61247		1	0	0	0.6	0	0	1	0.411501	1.12971	496900	0.011778	0		1.00002	1.02875	0.000261545	0.000185207	0.000260491	00:00:00	249815	2023-11-26			3.37377e+08	2023-11-26	1.37427e+07	1
2023-11-27	1.37756e+07	0			0.4	0	0	2.06634e+08	0	2.5		0	2023-11-27	0.61246		1	0	0	0.6	0	0	1	0.411511	1.12971	497200	0.011778	0		1.00002	1.02878	0.000261545	0.000185207	0.000260491	00:00:00	249815	2023-11-27			3.37383e+08	2023-11-27	1.37427e+07	1
2023-11-28	1.37756e+07	0			0.4	0	0	2.06634e+08	0	2.5		0	2023-11-28	0.61245		1	0	0	0.6	0	0	1	0.41152	1.12971	497500	0.011778	0		1.00002	1.0288	0.000261545	0.000185207	0.000260491	00:00:00	249815	2023-11-28			3.37388e+08	2023-11-28	1.37427e+07	1
2023-11-29	1.37756e+07	0			0.4	0	0	2.06634e+08	0	2.5		0	2023-11-29	0.61244		1	0	0	0.6	0	0	1	0.411529	1.12971	497800	0.011778	0		1.00002	1.02882	0.000261545	0.000185207	0.000260491	00:00:00	249815	2023-11-29			3.37394e+08	2023-11-29	1.37427e+07	1
2023-11-30	1.37756e+07	0			0.4	0	0	2.06634e+08	0	2.5		0	2023-11-30	0.61243		1	0	0	0.6	0	0	1	0.411539	1.12971	498100	0.011778	0		1.00002	1.02885	0.000261545	0.000185207	0.000260491	00:00:00	249815	2023-11-30			3.374e+08	2023-11-30	1.37427e+07	1
2023-12-01	1.37756e+07	0			0.4	0	0	2.06634e+08	0	2.5		0	2023-12-01	0.61242		1	0	0	0.6	0	0	1	0.411548	1.12971	498400	0.011778	0		1.00002	1.02887	0.000261545	0.000185207	0.000260491	00:00:00	249815	2023-12-01			3.37405e+08	2023-12-01	1.37427e+07	1
2023-12-02	1.37756e+07	0			0.4	0	0	2.06634e+08	0	2.5		0	2023-12-02	0.61241		1	0	0	0.6	0	0	1	0.411557	1.12971	498700	0.011778	0		1.00002	1.02889	0.000261545	0.000185207	0.000260491	00:00:00	249815	2023-12-02			3.37411e+08	2023-12-02	1.37427e+07	1
2023-12-03	1.37756e+07	0			0.4	0	0	2.06634e+08	0	2.5		0	2023-12-03	0.6124		1	0	0	0.6	0	0	1	0.411566	1.12971	499000	0.011778	0		1.00002	1.02892	0.000261545	0.000185207	0.000260491	00:00:00	249815	2023-12-03			3.37416e+08	2023-12-03	1.37427e+07	1
2023-12-04	1.37756e+07	0			0.4	0	0	2.06634e+08	0	2.5		0	2023-12-04	0.61239		1	0	0	0.6	0	0	1	0.411576	1.12971	499300	0.011778	0		1.00002	1.02894	0.000261545	0.000185207	0.000260491	00:00:00	249815	2023-12-04			3.37422e+08	2023-12-04	1.37427e+07	1
2023-12-05	1.37756e+07	0			0.4	0	0	2.06634e+08	0	2.5		0	2023-12-05	0.61238		1	0	0	0.6	0	0	1	0.411585	1.12971	499600	0.011778	0		1.00002	1.02896	0.000261545	0.000185207	0.000260491	00:00:00	249815	2023-12-05			3.37427e+08	2023-12-05	1.37427e+07	1
2023-12-06	1.37756e+07	0			0.4	0	0	2.06634e+08	0	2.5		0	2023-12-06	0.61237		1	0	0	0.6	0	0	1	0.411594	1.12971	499900	0.011778	0		1.00002	1.02899	0.000261545	0.000185207	0.000260491	00:00:00	249815	2023-12-06			3.37433e+08	2023-12-06	1.37427e+07	1
2023-12-07	1.37756e+07	0			0.4	0	0	2.06634e+08	0	2.5		0	2023-12-07	0.61236		1	0	0	0.6	0	0	1	0.411604	1.12971	500200	0.011778	0		1.00002	1.02901	0.000261545	0.000185207	0.000260491	00:00:00	249815	2023-12-07			3.37438e+08	2023-12-07	1.37427e+07	1
2023-12-08	1.37756e+07	0			0.4	0	0	2.06634e+08	0	2.5		0	2023-12-08	0.61235		1	0	0	0.6	0	0	1	0.411613	1.12971	500500	0.011778	0		1.00002	1.02903	0.000261545	0.000185207	0.000260491	00:00:00	249815	2023-12-08			3.37444e+08	2023-12-08	1.37427e+07	1
2023-12-09	1.37756e+07	0			0.4	0	0	2.06634e+08	0	2.5		0	2023-12-09	0.61234		1	0	0	0.6	0	0	1	0.411622	1.12971	500800	0.011778	0		1.00002	1.02906	0.000261545	0.000185207	0.000260491	00:00:00	249815	2023-12-09			3.37449e+08	2023-12-09	1.37427e+07	1
2023-12-10	1.37756e+07	0			0.4	0	0	2.06634e+08	0	2.5		0	2023-12-10	0.61233		1	0	0	0.6	0	0	1	0.411632	1.12971	501100	0.011778	0		1.00002	1.02908	0.000261545	0.000185207	0.000260491	00:00:00	249815	2023-12-10			3.37455e+08	2023-12-10	1.37427e+07	1
2023-12-11	1.37756e+07	0			0.4	0	0	2.06634e+08	0	2.5		0	2023-12-11	0.612319		1	0	0	0.6	0	0	1	0.411641	1.12971	501400	0.011778	0		1.00002	1.0291	0.000261545	0.000185207	0.000260491	00:00:00	249815	2023-12-11			3.37461e+08	2023-12-11	1.37427e+07	1
2023-12-12	1.37756e+07	0			0.4	0	0	2.06634e+08	0	2.5		0	2023-12-12	0.612309		1	0	0	0.6	0	0	1	0.41165	1.12971	501700	0.011778	0		1.00002	1.02913	0.000261545	0.000185207	0.000260491	00:00:00	249815	2023-12-12			3.37466e+08	2023-12-12	1.37427e+07	1
2023-12-13	1.37756e+07	0			0.4	0	0	2.06634e+08	0	2.5		0	2023-12-13	0.612299		1	0	0	0.6	0	0	1	0.411659	1.12971	502000	0.011778	0		1.00002	1.02915	0.000261545	0.000185207	0.000260491	00:00:00	249815	2023-12-13			3.37472e+08	2023-12-13	1.37427e+07	1
2023-12-14	1.37756e+07	0			0.4	0	0	2.06634e+08	0	2.5		0	2023-12-14	0.612289		1	0	0	0.6	0	0	1	0.411669	1.12971	502300	0.011778	0		1.00002	1.02917	0.000261545	0.000185207	0.000260491	00:00:00	249815	2023-12-14			3.37477e+08	2023-12-14	1.37427e+07	1
2023-12-15	1.37756e+07	0			0.4	0	0	2.06634e+08	0	2.5		0	2023-12-15	0.612279		1	0	0	0.6	0	0	1	0.411678	1.12971	502600	0.011778	0		1.00002	1.02919	0.000261545	0.000185207	0.000260491	00:00:00	249815	2023-12-15			3.37483e+08	2023-12-15	1.37427e+07	1
2023-12-16	1.37756e+07	0			0.4	0	0	2.06634e+08	0	2.5		0	2023-12-16	0.612269		1	0	0	0.6	0	0	1	0.411687	1.12971	502900	0.011778	0		1.00002	1.02922	0.000261545	0.000185207	0.000260491	00:00:00	249815	2023-12-16			3.37488e+08	2023-12-16	1.37427e+07	1
2023-12-17	1.37756e+07	0			0.4	0	0	2.06634e+08	0	2.5		0	2023-12-17	0.612259		1	0	0	0.6	0	0	1	0.411697	1.12971	503200	0.011778	0		1.00002	1.02924	0.000261545	0.000185207	0.000260491	00:00:00	249815	2023-12-17			3.37494e+08	2023-12-17	1.37427e+07	1
2023-12-18	1.37756e+07	0			0.4	0	0	2.06634e+08	0	2.5		0	2023-12-18	0.612249		1	0	0	0.6	0	0	1	0.411706	1.12971	503500	0.011778	0		1.00002	1.02926	0.000261545	0.000185207	0.000260491	00:00:00	249815	2023-12-18			3.37499e+08	2023-12-18	1.37427e+07	1
2023-12-19	1.37756e+07	0			0.4	0	0	2.06634e+08	0	2.5		0	2023-12-19	0.612239		1	0	0	0.6	0	0	1	0.411715	1.12971	503800	0.011778	0		1.00002	1.02929	0.000261545	0.000185207	0.000260491	00:00:00	249815	2023-12-19			3.37505e+08	2023-12-19	1.37427e+07	1
2023-12-20	1.37756e+07	0			0.4	0	0	2.06634e+08	0	2.5		0	2023-12-20	0.612229		1	0	0	0.6	0	0	1	0.411724	1.12971	504100	0.011778	0		1.00002	1.02931	0.000261545	0.000185207	0.000260491	00:00:00	249815	2023-12-20			3.3751e+08	2023-12-20	1.37427e+07	1
2023-12-21	1.37756e+07	0			0.4	0	0	2.06634e+08	0	2.5		0	2023-12-21	0.612219		1	0	0	0.6	0	0	1	0.411734	1.12971	504400	0.011778	0		1.00002	1.02933	0.000261545	0.000185207	0.000260491	00:00:00	249815	2023-12-21			3.37516e+08	2023-12-21	1.37427e+07	1
2023-12-22	1.37756e+07	0			0.4	0	0	2.06634e+08	0	2.5		0	2023-12-22	0.612209		1	0	0	0.6	0	0	1	0.411743	1.12971	504700	0.011778	0		1.00002	1.02936	0.000261545	0.000185207	0.000260491	00:00:00	249815	2023-12-22			3.37522e+08	2023-12-22	1.37427e+07	1
2023-12-23	1.37756e+07	0			0.4	0	0	2.06634e+08	0	2.5		0	2023-12-23	0.612199		1	0	0	0.6	0	0	1	0.411752	1.12971	505000	0.011778	0		1.00002	1.02938	0.000261545	0.000185207	0.000260491	00:00:00	249815	2023-12-23			3.37527e+08	2023-12-23	1.37427e+07	1
2023-12-24	1.37756e+07	0			0.4	0	0	2.06634e+08	0	2.5		0	2023-12-24	0.612189		1	0	0	0.6	0	0	1	0.411762	1.12971	505300	0.011778	0		1.00002	1.0294	0.000261545	0.000185207	0.000260491	00:00:00	249815	2023-12-24			3.37533e+08	2023-12-24	1.37427e+07	1
2023-12-25	1.37756e+07	0			0.4	0	0	2.06634e+08	0	2.5		0	2023-12-25	0.612179		1	0	0	0.6	0	0	1	0.411771	1.12971	505600	0.011778	0		1.00002	1.02943	0.000261545	0.000185207	0.000260491	00:00:00	249815	2023-12-25			3.37538e+08	2023-12-25	1.37427e+07	1
2023-12-26	1.37756e+07	0			0.4	0	0	2.06634e+08	0	2.5		0	2023-12-26	0.612168		1	0	0	0.6	0	0	1	0.41178	1.12971	505900	0.011778	0		1.00002	1.02945	0.000261545	0.000185207	0.000260491	00:00:00	249815	2023-12-26			3.37544e+08	2023-12-26	1.37427e+07	1
2023-12-27	1.37756e+07	0			0.4	0	0	2.06634e+08	0	2.5		0	2023-12-27	0.612158		1	0	0	0.6	0	0	1	0.41179	1.12971	506200	0.011778	0		1.00002	1.02947	0.000261545	0.000185207	0.000260491	00:00:00	249815	2023-12-27			3.37549e+08	2023-12-27	1.37427e+07	1
2023-12-28	1.37756e+07	0			0.4	0	0	2.06634e+08	0	2.5		0	2023-12-28	0.612148		1	0	0	0.6	0	0	1	0.411799	1.12971	506500	0.011778	0		1.00002	1.0295	0.000261545	0.000185207	0.000260491	00:00:00	249815	2023-12-28			3.37555e+08	2023-12-28	1.37427e+07	1
2023-12-29	1.37756e+07	0			0.4	0	0	2.06634e+08	0	2.5		0	2023-12-29	0.612138		1	0	0	0.6	0	0	1	0.411808	1.12971	506800	0.011778	0		1.00002	1.02952	0.000261545	0.000185207	0.000260491	00:00:00	249815	2023-12-29			3.3756e+08	2023-12-29	1.37427e+07	1
2023-12-30	1.37756e+07	0			0.4	0	0	2.06634e+08	0	2.5		0	2023-12-30	0.612128		1	0	0	0.6	0	0	1	0.411817	1.12971	507100	0.011778	0		1.00002	1.02954	0.000261545	0.000185207	0.000260491	00:00:00	249815	2023-12-30			3.37566e+08	2023-12-30	1.37427e+07	1
2023-12-31	1.37756e+07	0			0.4	0	0	2.06634e+08	0	2.5		0	2023-12-31	0.612118		1	0	0	0.6	0	0	1	0.411827	1.12971	507400	0.011778	0		1.00002	1.02957	0.000261545	0.000185207	0.000260491	00:00:00	249815	2023-12-31			3.37572e+08	2023-12-31	1.37427e+07	1
2024-01-01	1.37756e+07	0			0.4	0	0	2.06634e+08	0	2.5		0	2024-01-01	0.612108		1	0	0	0.6	0	0	1	0.411836	1.12971	507700	0.011778	0		1.00002	1.02959	0.000261545	0.000185207	0.000260491	00:00:00	249815	2024-01-01			3.37577e+08	2024-01-01	1.37427e+07	1
2024-01-02	1.37756e+07	0			0.4	0	0	2.06634e+08	0	2.5		0	2024-01-02	0.612098		1	0	0	0.6	0	0	1	0.411845	1.12971	508000	0.011778	0		1.00002	1.02961	0.000261545	0.000185207	0.000260491	00:00:00	249815	2024-01-02			3.37583e+08	2024-01-02	1.37427e+07	1
2024-01-03	1.37756e+07	0			0.4	0	0	2.06634e+08	0	2.5		0	2024-01-03	0.612088		1	0	0	0.6	0	0	1	0.411855	1.12971	508300	0.011778	0		1.00002	1.02964	0.000261545	0.000185207	0.000260491	00:00:00	249815	2024-01-03			3.37588e+08	2024-01-03	1.37427e+07	1
2024-01-04	1.37756e+07	0			0.4	0	0	2.06634e+08	0	2.5		0	2024-01-04	0.612078		1	0	0	0.6	0	0	1	0.411864	1.12971	508600	0.011778	0		1.00002	1.02966	0.000261545	0.000185207	0.000260491	00:00:00	249815	2024-01-04			3.37594e+08	2024-01-04	1.37427e+07	1
2024-01-05	1.37756e+07	0			0.4	0	0	2.06634e+08	0	2.5		0	2024-01-05	0.612068		1	0	0	0.6	0	0	1	0.411873	1.12971	508900	0.011778	0		1.00002	1.02968	0.000261545	0.000185207	0.000260491	00:00:00	249815	2024-01-05			3.37599e+08	2024-01-05	1.37427e+07	1
2024-01-06	1.37756e+07	0			0.4	0	0	2.06634e+08	0	2.5		0	2024-01-06	0.612058		1	0	0	0.6	0	0	1	0.411882	1.12971	509200	0.011778	0		1.00002	1.02971	0.000261545	0.000185207	0.000260491	00:00:00	249815	2024-01-06			3.37605e+08	2024-01-06	1.37427e+07	1
2024-01-07	1.37756e+07	0			0.4	0	0	2.06634e+08	0	2.5		0	2024-01-07	0.612048		1	0	0	0.6	0	0	1	0.411892	1.12971	509500	0.011778	0		1.00002	1.02973	0.000261545	0.000185207	0.000260491	00:00:00	249815	2024-01-07			3.3761e+08	2024-01-07	1.37427e+07	1
2024-01-08	1.37756e+07	0			0.4	0	0	2.06634e+08	0	2.5		0	2024-01-08	0.612038		1	0	0	0.6	0	0	1	0.411901	1.12971	509800	0.011778	0		1.00002	1.02975	0.000261545	0.000185207	0.000260491	00:00:00	249815	2024-01-08			3.37616e+08	2024-01-08	1.37427e+07	1
2024-01-09	1.37756e+07	0			0.4	0	0	2.06634e+08	0	2.5		0	2024-01-09	0.612028		1	0	0	0.6	0	0	1	0.41191	1.12971	510100	0.011778	0		1.00002	1.02978	0.000261545	0.000185207	0.000260491	00:00:00	249815	2024-01-09			3.37621e+08	2024-01-09	1.37427e+07	1
2024-01-10	1.37756e+07	0			0.4	0	0	2.06634e+08	0	2.5		0	2024-01-10	0.612018		1	0	0	0.6	0	0	1	0.41192	1.12971	510400	0.011778	0		1.00002	1.0298	0.000261545	0.000185207	0.000260491	00:00:00	249815	2024-01-10			3.37627e+08	2024-01-10	1.37427e+07	1
2024-01-11	1.37756e+07	0			0.4	0	0	2.06634e+08	0	2.5		0	2024-01-11	0.612008		1	0	0	0.6	0	0	1	0.411929	1.12971	510700	0.011778	0		1.00002	1.02982	0.000261545	0.000185207	0.000260491	00:00:00	249815	2024-01-11			3.37633e+08	2024-01-11	1.37427e+07	1
2024-01-12	1.37756e+07	0			0.4	0	0	2.06634e+08	0	2.5		0	2024-01-12	0.611997		1	0	0	0.6	0	0	1	0.411938	1.12971	511000	0.011778	0		1.00002	1.02985	0.000261545	0.000185207	0.000260491	00:00:00	249815	2024-01-12			3.37638e+08	2024-01-12	1.37427e+07	1
2024-01-13	1.37756e+07	0			0.4	0	0	2.06634e+08	0	2.5		0	2024-01-13	0.611987		1	0	0	0.6	0	0	1	0.411947	1.12971	511300	0.011778	0		1.00002	1.02987	0.000261545	0.000185207	0.000260491	00:00:00	249815	2024-01-13			3.37644e+08	2024-01-13	1.37427e+07	1
2024-01-14	1.37756e+07	0			0.4	0	0	2.06634e+08	0	2.5		0	2024-01-14	0.611977		1	0	0	0.6	0	0	1	0.411957	1.12971	511600	0.011778	0		1.00002	1.02989	0.000261545	0.000185207	0.000260491	00:00:00	249815	2024-01-14			3.37649e+08	2024-01-14	1.37427e+07	1
2024-01-15	1.37756e+07	0			0.4	0	0	2.06634e+08	0	2.5		0	2024-01-15	0.611967		1	0	0	0.6	0	0	1	0.411966	1.12971	511900	0.011778	0		1.00002	1.02992	0.000261545	0.000185207	0.000260491	00:00:00	249815	2024-01-15			3.37655e+08	2024-01-15	1.37427e+07	1
2024-01-16	1.37756e+07	0			0.4	0	0	2.06634e+08	0	2.5		0	2024-01-16	0.611957		1	0	0	0.6	0	0	1	0.411975	1.12971	512200	0.011778	0		1.00002	1.02994	0.000261545	0.000185207	0.000260491	00:00:00	249815	2024-01-16			3.3766e+08	2024-01-16	1.37427e+07	1
2024-01-17	1.37756e+07	0			0.4	0	0	2.06634e+08	0	2.5		0	2024-01-17	0.611947		1	0	0	0.6	0	0	1	0.411985	1.12971	512500	0.011778	0		1.00002	1.02996	0.000261545	0.000185207	0.000260491	00:00:00	249815	2024-01-17			3.37666e+08	2024-01-17	1.37427e+07	1
2024-01-18	1.37756e+07	0			0.4	0	0	2.06634e+08	0	2.5		0	2024-01-18	0.611937		1	0	0	0.6	0	0	1	0.411994	1.12971	512800	0.011778	0		1.00002	1.02998	0.000261545	0.000185207	0.000260491	00:00:00	249815	2024-01-18			3.37671e+08	2024-01-18	1.37427e+07	1
2024-01-19	1.37756e+07	0			0.4	0	0	2.06634e+08	0	2.5		0	2024-01-19	0.611927		1	0	0	0.6	0	0	1	0.412003	1.12971	513100	0.011778	0		1.00002	1.03001	0.000261545	0.000185207	0.000260491	00:00:00	249815	2024-01-19			3.37677e+08	2024-01-19	1.37427e+07	1
2024-01-20	1.37756e+07	0			0.4	0	0	2.06634e+08	0	2.5		0	2024-01-20	0.611917		1	0	0	0.6	0	0	1	0.412012	1.12971	513400	0.011778	0		1.00002	1.03003	0.000261545	0.000185207	0.000260491	00:00:00	249815	2024-01-20			3.37683e+08	2024-01-20	1.37427e+07	1
2024-01-21	1.37756e+07	0			0.4	0	0	2.06634e+08	0	2.5		0	2024-01-21	0.611907		1	0	0	0.6	0	0	1	0.412022	1.12971	513700	0.011778	0		1.00002	1.03005	0.000261545	0.000185207	0.000260491	00:00:00	249815	2024-01-21			3.37688e+08	2024-01-21	1.37427e+07	1
2024-01-22	1.37756e+07	0			0.4	0	0	2.06634e+08	0	2.5		0	2024-01-22	0.611897		1	0	0	0.6	0	0	1	0.412031	1.12971	514000	0.011778	0		1.00002	1.03008	0.000261545	0.000185207	0.000260491	00:00:00	249815	2024-01-22			3.37694e+08	2024-01-22	1.37427e+07	1
2024-01-23	1.37756e+07	0			0.4	0	0	2.06634e+08	0	2.5		0	2024-01-23	0.611887		1	0	0	0.6	0	0	1	0.41204	1.12971	514300	0.011778	0		1.00002	1.0301	0.000261545	0.000185207	0.000260491	00:00:00	249815	2024-01-23			3.37699e+08	2024-01-23	1.37427e+07	1
2024-01-24	1.37756e+07	0			0.4	0	0	2.06634e+08	0	2.5		0	2024-01-24	0.611877		1	0	0	0.6	0	0	1	0.41205	1.12971	514600	0.011778	0		1.00002	1.03012	0.000261545	0.000185207	0.000260491	00:00:00	249815	2024-01-24			3.37705e+08	2024-01-24	1.37427e+07	1
2024-01-25	1.37756e+07	0			0.4	0	0	2.06634e+08	0	2.5		0	2024-01-25	0.611867		1	0	0	0.6	0	0	1	0.412059	1.12971	514900	0.011778	0		1.00002	1.03015	0.000261545	0.000185207	0.000260491	00:00:00	249815	2024-01-25			3.3771e+08	2024-01-25	1.37427e+07	1
2024-01-26	1.37756e+07	0			0.4	0	0	2.06634e+08	0	2.5		0	2024-01-26	0.611857		1	0	0	0.6	0	0	1	0.412068	1.12971	515200	0.011778	0		1.00002	1.03017	0.000261545	0.000185207	0.000260491	00:00:00	249815	2024-01-26			3.37716e+08	2024-01-26	1.37427e+07	1
2024-01-27	1.37756e+07	0			0.4	0	0	2.06634e+08	0	2.5		0	2024-01-27	0.611847		1	0	0	0.6	0	0	1	0.412077	1.12971	515500	0.011778	0		1.00002	1.03019	0.000261545	0.000185207	0.000260491	00:00:00	249815	2024-01-27			3.37721e+08	2024-01-27	1.37427e+07	1
2024-01-28	1.37756e+07	0			0.4	0	0	2.06634e+08	0	2.5		0	2024-01-28	0.611837		1	0	0	0.6	0	0	1	0.412087	1.12971	515800	0.011778	0		1.00002	1.03022	0.000261545	0.000185207	0.000260491	00:00:00	249815	2024-01-28			3.37727e+08	2024-01-28	1.37427e+07	1
2024-01-29	1.37756e+07	0			0.4	0	0	2.06634e+08	0	2.5		0	2024-01-29	0.611826		1	0	0	0.6	0	0	1	0.412096	1.12971	516100	0.011778	0		1.00002	1.03024	0.000261545	0.000185207	0.000260491	00:00:00	249815	2024-01-29			3.37732e+08	2024-01-29	1.37427e+07	1
[truncated: 3,586 more rows]

## Sheet: US-daily
2020-05-15	2020-07-01	2040-09-01	2020-07-01	2020-06-01	2020-08-15	2021-02-01	scale all unlocks by	0-main region, 1-subregion, 2-without sub	Set Z2 to 100% to run normally, less to use daily intermittent	UNLOCK ALL->1	Initial & Unlocked R0	Total / Known case ratio	Mortality as % of vent cases enter at right	FINAL CASES	Econ Cost % 18-month lock down	Total Est. Deaths	Use proportional vent. alloc.	Initial Known Cases on Vent.	Vents per capita	Spreading Window (Days)	Case Duration	Vents avail for current region	Vents main region	Vents subregion (if not auto alloc)	Pre-Peak Vent. Util. Target	MWFSa or late Vent. Util. Target	TTSu Vent. Util. Target	Population	Population main region	Population subregion (e.g. NY St.)	Name of main region	Name of sub-region	Ventil mfg rate/day	Change per day in crit cases on vent (.01%=half in 1 yr.)	region mortality % of vent cases	sub-region mortality % of vent cases	region w/o sub-region mortality % vent cases	immunity wears off (days)	population growth rate	RECURRENT EPIDEMIC 02/10/21	economic efficiency of unlock	low season start month	low season duration (months)	low season R0 max reduction
[truncated: 4,998 more rows]

[truncated: 7 more sheets: endemic plots, World-likely, profiles, Analysis, US-exp, US-exp2, NYNJCT]
